# Supplementary material for: The lnc-FANCI-2 intrinsically restricts RAS signaling in HPV16-infected cervical cancer
Source: bioRxiv preprint, doi:10.1101/2024.02.01.578320, version 4 (2025-04-21)
Supplement: Supplemental table S1 [file 578320_file02.xlsx]

## Sheet: Sheet1
Table S1. Genome-wide Effect of lnc-FANCI-2 KO in ΔPr-A9 and ΔYY1 cells on gene expression when compared with parental WT CaSki cells
		ΔPr-A9 VS WT					ΔYY1-D5 VS WT					WT_FPKM				ΔPr-A9_FPKM				ΔYY1-D5_FPKM
Ensembl ID	Gene Symbol	Fold Change	log2 Fold Change	p-Value (unadjusted)	FDR	GSEA Ranking Score	Fold Change	log2 Fold Change	p-Value (unadjusted)	FDR	GSEA Ranking Score	HBL_1_S1	HBL_2_S2	HBL_3_S3	HBL_4_S4	HBL_5_S5	HBL_6_S6	HBL_7_S7	HBL_8_S8	HBL_9_S9	HBL_10_S10	HBL_11_S11	HBL_12_S12
ENSG00000128274.17	A4GALT	-1.70431	-0.769187	0.0290182	0.0599966	-1.53733	-1.97774	-0.983856	0.00929183	0.0280527	-2.0319	0.14	0.23	0.35	0.26	0.18	0.07	0.12	0.12	0.11	0.15	0.13	0.04
ENSG00000094914.13	AAAS	1.04026	0.0569463	0.646533	0.730996	0.189409	-1.12557	-0.170652	0.174651	0.280283	-0.757829	25.42	26.29	18.7	19.67	20.98	21.88	24.05	23.75	18.22	19.8	19.12	18.87
ENSG00000081760.17	AACS	-1.09368	-0.129197	0.0258805	0.0546042	-1.58703	1.18877	0.249473	0.000291602	0.00188668	3.53521	8.88	9.57	9.23	10.27	8.68	8.76	8.01	8.38	10.75	10.35	10.79	10.74
ENSG00000109576.14	AADAT	1.7128	0.776359	0.00100245	0.00384511	2.99894	-56.8578	-5.82929	1.05e-08	1.54e-06	-7.97933	1.03	0.63	1.11	1	1.77	1.57	1.57	1.27	0	0	0	0
ENSG00000103591.12	AAGAB	-1.26539	-0.339582	0.00167305	0.00585694	-2.77649	1.11049	0.1512	0.0557679	0.115147	1.25362	34.91	34.13	32.81	30.96	25.21	25.31	27.06	28.05	33.69	34.93	35.13	35.52
ENSG00000115977.19	AAK1	-1.22943	-0.297987	0.426555	0.528008	-0.370025	-1.14714	-0.198045	0.529576	0.639361	-0.276072	10.56	10.95	20.43	27.65	17.53	14.35	9.38	10.01	13.35	12.44	10.79	13.08
ENSG00000087884.14	AAMDC	1.01626	0.0232735	0.928814	0.949636	0.0320711	1.03987	0.0564063	0.784211	0.848461	0.105567	10.93	11.47	9.57	6.24	6.72	7.96	10.4	11.8	8.39	7.83	9.83	8.62
ENSG00000127837.9	AAMP	-1.50124	-0.586156	0.0002913	0.00144498	-3.53566	1.46364	0.549557	0.000230031	0.00158049	3.63821	93.9	94.35	79.28	68.7	49.11	51.41	59.11	56.12	117.37	113.73	115.65	114.81
ENSG00000131043.12	AAR2	-1.04312	-0.0609073	0.305404	0.405644	-0.515125	-1.11623	-0.158635	0.024125	0.0595932	-1.61753	16.84	16.55	15.27	15.86	14.7	15.46	14.87	15.44	13.06	13.88	14.32	13.94
ENSG00000090861.15	AARS	-1.31554	-0.395658	5.43e-05	0.00039502	-4.26534	1.23585	0.305499	0.000339844	0.0021302	3.46872	53.88	49.32	56.22	61.78	42.9	41.26	41.22	40.98	67.76	66.16	72.43	65.52
ENSG00000124608.5	AARS2	1.14591	0.196495	0.00288454	0.00906336	2.53992	-1.09815	-0.13507	0.0138763	0.038466	-1.85772	12.06	11.19	11.3	11.58	13.35	12.47	13.19	12.8	9.93	10.65	10.29	10.2
ENSG00000266967.7	AARSD1	-1.17161	-0.228487	0.00310842	0.00961118	-2.50746	-1.20409	-0.267947	0.00103272	0.00497895	-2.98602	42.39	41.04	39.76	41.85	34.58	34.48	32.74	34.43	31.36	32.99	33.76	33.21
ENSG00000157426.14	AASDH	-1.35199	-0.435086	0.000118042	0.000710751	-3.92797	-1.36655	-0.450542	0.00120615	0.00563008	-2.9186	3.78	3.96	3.62	3.58	2.45	2.5	2.41	2.66	2.9	2.08	2.45	2.53
ENSG00000149313.11	AASDHPPT	1.05831	0.0817689	0.285549	0.384029	0.544319	-1.09516	-0.131141	0.0708027	0.138878	-1.14995	13.26	14.62	14.94	16.98	14.14	14.72	14.15	14.91	12.48	12.47	11.35	10.93
ENSG00000008311.15	AASS	2.37738	1.24937	4.77e-10	2.25e-07	9.32157	1.33902	0.421182	2.11e-05	0.000269649	4.67601	2.25	2.14	2.33	2.47	5.28	5.38	5.06	5.16	2.72	2.82	2.96	2.94
ENSG00000275700.5	AATF	-1.47919	-0.56481	0.000329038	0.00158461	-3.48275	-1.35169	-0.434769	0.00105821	0.00507739	-2.97543	213.97	224.13	180.83	174.12	122.43	125.19	134.38	131.89	138.59	138.84	134.71	133.25
ENSG00000183044.12	ABAT	1.04844	0.0682477	0.247967	0.342855	0.605606	1.19711	0.259552	0.000508614	0.0028846	3.29361	7.14	6.82	7.35	7.11	6.76	7.19	6.88	6.41	7.64	7.43	8.07	8.13
ENSG00000165029.16	ABCA1	1.02314	0.0329985	0.492799	0.5916	0.30733	1.2536	0.326073	1.74e-05	0.0002331	4.75827	8.76	8.93	9.8	9.5	10.06	10	8.74	8.87	11.87	11.23	11.04	10.99
ENSG00000251595.7	ABCA11P	1.02187	0.0312083	0.722452	0.791824	0.141191	-1.10949	-0.149901	0.0357076	0.0809979	-1.44724	4.94	4.87	5.12	5.14	5.54	5.21	4.54	4.22	4.26	4.1	4.43	4.07
ENSG00000144452.15	ABCA12	-2.0555	-1.03949	0.000300775	0.00148065	-3.52176	1.06328	0.0885222	0.694691	0.777377	0.158208	0.2	0.13	0.22	0.19	0.09	0.09	0.08	0.09	0.25	0.13	0.19	0.17
ENSG00000179869.15	ABCA13	1.76342	0.818378	7.4e-07	1.82e-05	6.131	1.4094	0.495079	1.02e-05	0.000161626	4.99064	3.13	2.95	3.34	3.27	5.44	5.85	5.21	5.5	4.19	4.36	4.29	4.45
ENSG00000238098.9	ABCA17P	1.53438	0.617659	0.000538384	0.00234186	3.26891	-2.0087	-1.00626	4.22e-05	0.000450929	-4.37446	0.87	1.17	1.27	1.18	1.38	1.88	1.4	1.62	0.39	0.51	0.4	0.58
ENSG00000107331.17	ABCA2	-1.00187	-0.00269237	0.987872	0.991731	-0.00529931	-1.25449	-0.327101	0.0948471	0.174878	-1.02298	2.84	3.19	3.03	4.81	3.29	4.28	3.31	3.41	2.57	2.94	2.82	2.96
ENSG00000167972.14	ABCA3	1.08652	0.119708	0.498378	0.596661	0.302441	-3.67159	-1.87641	1.27e-05	0.000187137	-4.8976	0.42	0.42	0.34	0.43	0.49	0.47	0.38	0.32	0.14	0.29	0.06	0.12
ENSG00000154265.16	ABCA5	1.39391	0.479135	0.00102581	0.00392089	2.98893	1.31161	0.391338	0.00211533	0.00877063	2.67462	3.42	3.5	4.71	3.76	5.65	5.93	5.07	4.62	4.95	4.42	4.33	5.54
ENSG00000064687.12	ABCA7	-1.08063	-0.111873	0.521187	0.617539	-0.283006	1.07668	0.106587	0.456844	0.572801	0.340232	2.55	2.46	3.04	3.6	2.22	1.81	1.98	1.92	2.18	2.53	1.75	2.41
ENSG00000135776.5	ABCB10	-1.03799	-0.0537869	0.453987	0.554629	-0.342957	-1.57128	-0.651945	5.46e-06	0.000104379	-5.26308	4.78	4.82	5.02	4.41	4.51	4.23	4.32	4.71	2.98	2.7	2.95	2.91
ENSG00000115657.14	ABCB6	-1.37824	-0.462829	1.31e-05	0.000137201	-4.88158	1.22921	0.297729	0.000595434	0.00327223	3.22517	22.69	22.25	24.84	23.98	16.71	16.73	17.68	15.09	26.4	27.2	28.08	31.44
ENSG00000131269.17	ABCB7	1.31073	0.390371	0.000559121	0.00241342	3.25249	1.02453	0.0349676	0.627794	0.722643	0.202183	23.11	23	21.04	19.61	26.08	32.22	29.96	31.69	26.44	21.97	21.27	24.3
ENSG00000197150.12	ABCB8	-1.60694	-0.684316	8.08e-06	9.68e-05	-5.09263	1.0088	0.0126387	0.840233	0.891284	0.0756005	13.94	16.3	15.36	16.11	9.77	8.21	9.57	9.7	13.15	14.64	15.27	14.45
ENSG00000150967.18	ABCB9	1.02595	0.036959	0.63622	0.722424	0.196393	-1.18817	-0.24874	0.00785548	0.0245649	-2.10483	3.87	4.66	4.93	5.51	4.99	4.24	4.4	4.75	4.01	3.98	3.3	3.18
ENSG00000103222.19	ABCC1	1.03184	0.0452213	0.833106	0.877207	0.0792998	-1.12352	-0.16803	0.359508	0.481431	-0.444291	8.75	9.07	15.69	16.63	15.81	12.96	9.6	9.5	10.99	9.1	9.07	9.48
ENSG00000124574.15	ABCC10	-1.22132	-0.288443	0.00406161	0.0119092	-2.3913	-1.23308	-0.302269	0.00181667	0.0077846	-2.74072	10.17	10.49	10.65	13.5	9.61	9.31	8.86	8.95	9.24	9.24	8.84	10.35
ENSG00000023839.11	ABCC2	1.06155	0.0861754	0.353094	0.455642	0.45211	1.24404	0.315038	0.00296951	0.0114402	2.52732	1.85	2.04	2.16	2.48	2.53	2.39	1.85	2.81	2.81	2.34	2.21	2.61
ENSG00000125257.15	ABCC4	-1.36941	-0.453552	1.65e-06	3.12e-05	-5.78208	-1.06209	-0.0868994	0.0542688	0.11271	-1.26545	12.34	13	14.4	14.41	10.21	9.92	8.84	10.04	11.68	11.64	12.52	11.64
ENSG00000114770.17	ABCC5	-1.12282	-0.167124	0.136607	0.212319	-0.864526	-1.31909	-0.399548	0.00180481	0.00774468	-2.74357	21.22	21.53	26.78	30.54	25.64	21.44	20.36	21.77	18.02	18.53	17.61	18.97
ENSG00000069431.11	ABCC9	34.9608	5.12767	3.13e-09	7.46e-07	8.50392	24.733	4.62836	8.05e-08	6.04e-06	7.09444	0.03	0.02	0.02	0.02	0.78	0.74	0.73	0.81	0.22	0.33	0.25	0.26
ENSG00000101986.12	ABCD1	1.12361	0.168142	0.381888	0.484212	0.418064	-1.45627	-0.54228	0.0186037	0.0484861	-1.7304	0.34	0.37	0.59	0.35	0.55	0.54	0.58	0.4	0.35	0.17	0.27	0.23
ENSG00000117528.13	ABCD3	1.3279	0.409147	2.12e-05	0.000195257	4.67439	1.25737	0.330405	5.62e-05	0.000558684	4.24994	26.68	28.71	27.56	25.71	33.54	35.19	33.9	35.34	34.84	30.7	31.81	32.02
ENSG00000119688.21	ABCD4	1.19928	0.262163	0.00558409	0.0155001	2.25305	1.19358	0.255293	0.00348613	0.0130075	2.45766	18.43	19.02	20.03	24.78	25.91	24.62	22.79	24.1	23.6	24.73	24.8	23.11
ENSG00000164163.11	ABCE1	1.39856	0.483938	0.000131065	0.000769703	3.88251	-1.10645	-0.145939	0.0841167	0.159025	-1.07512	71.74	68.18	63.48	64.2	84.95	86.51	87.98	93.77	58.03	54.07	55.41	58.23
ENSG00000204574.13	ABCF1	1.09824	0.135193	0.0820381	0.140395	1.08598	-1.00869	-0.0124801	0.836386	0.888441	-0.0775932	91.64	91.44	75.98	68.15	84.57	83.63	98.69	102.38	82.5	84.14	79.98	81.84
ENSG00000033050.9	ABCF2	-1.12786	-0.173586	0.164818	0.246419	-0.782995	1.17179	0.228709	0.049147	0.104128	1.3085	31.1	32.02	27.18	22.98	23.05	23.73	27.93	25.46	30.59	34.1	32.06	30.79
ENSG00000285292.1	ABCF2	-1.084	-0.116361	0.216223	0.307362	-0.665099	1.11906	0.162291	0.0737951	0.143638	1.13197	25.49	24.16	24.03	31.21	24.09	25.15	20.84	24.82	29.19	26.6	26.83	30.5
ENSG00000161204.11	ABCF3	1.00087	0.00126116	0.984748	0.990068	0.006675	-1.10237	-0.140604	0.0280551	0.0670037	-1.55199	43.95	43.24	42.93	43.57	40.8	40.44	47.96	44.57	39.08	38.32	39.06	40.26
ENSG00000160179.18	ABCG1	-1.81191	-0.857507	0.000377982	0.00177132	-3.42253	-1.46024	-0.546201	0.00381316	0.0139606	-2.41872	0.52	0.51	0.67	0.76	0.41	0.25	0.26	0.31	0.38	0.28	0.3	0.39
ENSG00000118777.12	ABCG2	-1.23997	-0.310308	0.15821	0.238509	-0.800765	1.68451	0.752327	0.00130687	0.00599527	2.88377	0.53	0.39	0.34	0.3	0.53	0.29	0.34	0.24	0.62	0.51	0.6	0.49
ENSG00000144827.9	ABHD10	1.02748	0.0391154	0.620512	0.708813	0.20725	-1.08053	-0.111735	0.138028	0.234812	-0.860033	12.79	14.17	12.93	12.53	12.77	12.73	13.71	14.17	10.77	11.34	12.51	12.03
ENSG00000106077.18	ABHD11	-1.11963	-0.163016	0.0406079	0.0790624	-1.39139	1.16213	0.21677	0.013629	0.037958	1.86554	9.34	9.74	9.5	9.27	8.43	7.46	9.01	8.75	10.07	9.91	10.91	11.22
ENSG00000100997.19	ABHD12	-1.38027	-0.464948	0.000107981	0.000666786	-3.96665	1.13906	0.187846	0.0200815	0.0515149	1.6972	42.22	42.11	38.92	38.06	27.85	27.46	29.96	29.67	43.08	45.69	46.04	47.25
ENSG00000139826.6	ABHD13	-1.28517	-0.361959	7e-05	0.000473682	-4.15521	1.06448	0.0901493	0.127974	0.221813	0.892877	3.95	3.93	3.84	3.88	2.99	2.78	2.85	2.89	4.13	3.8	3.96	3.78
ENSG00000248487.9	ABHD14A	-1.02405	-0.0342823	0.847721	0.888436	-0.0717472	-1.14635	-0.197051	0.298227	0.420235	-0.525453	3.82	3.87	3.18	2.72	2.81	2.65	3.04	2.89	2.3	2.21	2.37	2.98
ENSG00000114786.16	ABHD14A-ACY1	-2.72836	-1.44803	0.0382998	0.075366	-1.4168	-1.60802	-0.685284	0.316467	0.439013	-0.499671	0.25	0.36	0.34	2.73	0.16	0.22	0.24	0.22	0.33	0.36	0.06	0.47
ENSG00000114779.19	ABHD14B	-1.52231	-0.606263	0.00365928	0.0109636	-2.4366	-1.05847	-0.0819774	0.552625	0.659822	-0.25757	9.27	8.52	6.62	6.32	4.63	4.64	5.75	4.28	6.75	6.68	7.02	6.54
ENSG00000168792.5	ABHD15	-1.47464	-0.560365	1.76e-05	0.000169625	-4.75525	-1.41141	-0.497141	9.7e-05	0.000830804	-4.01303	3.72	3.72	3.95	4.62	2.65	2.48	2.58	2.45	2.45	2.62	2.88	2.49
ENSG00000204427.12	ABHD16A	-1.01742	-0.024917	0.735074	0.801721	-0.133669	-1.10577	-0.145046	0.0711219	0.139419	-1.148	12.46	12.17	10.6	12.54	11.68	11.67	11.1	11.59	9.34	9.55	10.2	11.14
ENSG00000129968.15	ABHD17A	-1.0377	-0.0533889	0.422074	0.524185	-0.374611	1.08587	0.118847	0.121799	0.213342	0.914355	10.89	9.66	9.64	11.33	11.17	9.08	10.83	9.5	9.64	11.3	11.3	9.36
ENSG00000107362.13	ABHD17B	-1.01457	-0.0208655	0.831056	0.87578	-0.0803695	1.21596	0.282101	0.0176287	0.0464368	1.75378	4.77	5.31	4.48	4.61	4.48	3.94	4.49	4.72	5.71	5.01	4.95	5.41
ENSG00000136379.12	ABHD17C	-1.05984	-0.0838464	0.414426	0.516589	-0.382553	-1.16306	-0.217929	0.0489077	0.10369	-1.31062	9.5	8.68	11.75	12.58	9.47	10.64	8.94	9.13	9.01	8.3	7.7	8.75
ENSG00000164074.15	ABHD18	1.16675	0.222501	0.0125714	0.0302937	1.90062	-1.28695	-0.363951	0.000976679	0.00477555	-3.01025	3.24	3.11	3.98	3.48	3.53	3.96	3.92	3.98	2.61	2.25	2.59	2.84
ENSG00000140526.18	ABHD2	1.18156	0.240695	0.0014881	0.00532922	2.82737	-1.03934	-0.0556713	0.277453	0.398083	-0.55681	12.79	13.25	14.63	17.83	19.17	21.86	21.61	16.33	13.61	14.72	12.76	13.9
ENSG00000158201.10	ABHD3	1.17366	0.231009	0.0026187	0.00838927	2.58191	1.2125	0.277986	0.000953476	0.00469314	3.02069	12.73	13.81	14.74	14.25	15.32	15.7	13.57	15.44	14.74	15.84	14.85	15.41
ENSG00000100439.10	ABHD4	-1.01187	-0.01702	0.802425	0.853767	-0.0955956	-1.06815	-0.0951078	0.141523	0.23937	-0.849172	5.08	5.69	5.37	6.26	5.03	5.16	5.2	5.37	4.34	4.95	4.63	4.61
ENSG00000011198.9	ABHD5	-1.02869	-0.0408047	0.633167	0.71953	-0.198482	-1.04869	-0.0685874	0.398539	0.520098	-0.39953	12.23	12.94	9.56	9.79	9.98	9.76	9.83	9.41	9.04	10.6	9.6	9.92
ENSG00000163686.14	ABHD6	1.06872	0.0958794	0.448602	0.549169	0.348139	1.18417	0.24388	0.0369098	0.0832879	1.43286	2.6	2.61	3.15	2.56	2.64	2.58	2.76	2.85	2.9	2.82	2.56	2.78
ENSG00000127220.6	ABHD8	1.29667	0.374808	0.0033953	0.010347	2.46912	1.14325	0.193137	0.101312	0.184008	0.994338	3.31	2.98	2.7	3.28	4.07	3.65	4.07	3.37	2.93	3.57	3.45	2.78
ENSG00000136754.17	ABI1	1.07906	0.109777	0.228325	0.321099	0.641446	1.1817	0.240869	0.0144368	0.0396078	1.84053	24.21	23.04	21.54	19.12	22.34	23.29	23.7	23.92	25.23	25.33	25.35	25.63
ENSG00000138443.16	ABI2	-1.60494	-0.682523	0.000710457	0.00292251	-3.14846	-1.19822	-0.260889	0.0546434	0.113267	-1.26246	13.44	15.11	14.75	16.59	11.22	11.29	9.59	10.24	12.28	15.17	13.89	13.75
ENSG00000097007.18	ABL1	1.19855	0.261291	0.00374165	0.0111711	2.42694	1.10644	0.14593	0.0457701	0.098487	1.33942	15.26	13.42	18.33	21.5	20.62	18.82	17.75	19.6	17.86	18.16	16.54	20.1
ENSG00000143322.20	ABL2	1.97998	0.985484	8.85e-07	2.05e-05	6.05311	1.32863	0.409938	6.93e-05	0.000645896	4.15897	28.44	30.81	30.97	30.9	64.86	65.79	55.91	61.17	39.55	38.82	36.91	41.64
ENSG00000099204.20	ABLIM1	-1.08688	-0.120191	0.0690575	0.121891	-1.16079	1.28315	0.359691	1.11e-05	0.000170153	4.95639	52.88	51.75	48.28	36.02	43.82	51.62	41.34	47.49	74.11	70.68	60.51	69.93
ENSG00000173210.19	ABLIM3	-1.1693	-0.225639	0.100174	0.165248	-0.999246	1.11303	0.154487	0.188103	0.295816	0.725603	8.39	8.52	11.86	13.07	10.09	9	7.41	7.48	11.72	11.3	9.82	10.29
ENSG00000159842.15	ABR	-1.01246	-0.0178582	0.78778	0.843023	-0.103595	-1.44315	-0.529216	4.92e-06	9.69e-05	-5.30818	18.37	19.03	22.11	20.08	18.98	19.48	19.11	16.7	13.96	13.35	12.94	14.98
ENSG00000146386.8	ABRACL	-1.11033	-0.150991	0.191328	0.27817	-0.718222	1.11866	0.161769	0.10928	0.195787	0.961461	38.69	33.94	34.07	29.61	25.83	27.97	30.02	33.22	37.95	33.32	38.14	35.53
ENSG00000163322.14	ABRAXAS1	-1.0775	-0.107684	0.305488	0.405674	-0.515006	1.23237	0.30143	0.0039572	0.0143696	2.40261	2.77	2.42	2.49	2.78	1.85	2.53	2.09	2.38	2.85	2.63	3.04	2.84
ENSG00000165660.8	ABRAXAS2	1.12339	0.167856	0.0709444	0.124678	1.14908	1.28862	0.365831	0.000342815	0.00214236	3.46494	10.51	9.73	9.15	8.87	9.54	10.26	10.56	11.26	11.79	11.47	11.94	11.83
ENSG00000146109.5	ABT1	1.02647	0.0376863	0.613656	0.703345	0.212075	1.01689	0.0241669	0.736649	0.810497	0.132739	12.51	12.72	11.14	11.01	11.77	11.5	11.69	12.35	11.54	11.72	11.15	11.68
ENSG00000114626.18	ABTB1	-1.24853	-0.320232	0.143853	0.221063	-0.842082	-1.26678	-0.341166	0.106169	0.191157	-0.974001	1.08	1.09	1.76	1.86	1.21	1.21	0.88	0.79	0.68	0.95	0.71	1.1
ENSG00000166016.6	ABTB2	1.85907	0.894585	6.12e-05	0.00042979	4.21297	1.26848	0.343101	0.0310843	0.0726966	1.50746	1.02	1	1.21	1.78	2.15	2.33	2.03	2.04	1.47	1.43	1.3	1.37
ENSG00000185065.6	AC000068.1	-1.782	-0.8335	0.0011719	0.00436488	-2.93111	-1.57219	-0.652779	0.00290795	0.0112546	-2.53641	0.99	1	0.79	0.92	0.54	0.49	0.42	0.55	0.48	0.56	0.52	0.51
ENSG00000235776.2	AC000089.1	1.34375	0.42627	0.0233168	0.0501557	1.63233	1.09835	0.135341	0.279596	0.400244	0.55347	4.09	5.09	5.67	4.38	6.91	6.19	7.08	4.62	4.78	4.69	4.77	4.49
ENSG00000243107.1	AC000120.1	-1.19992	-0.262933	0.0359648	0.0715628	-1.44412	1.18452	0.244302	0.0967842	0.177946	1.0142	1.43	1.45	1.72	1.68	1.47	1.18	1.25	1.18	1.4	1.88	1.39	1.94
ENSG00000285953.1	AC000120.3	-1.29373	-0.371539	0.340946	0.443277	-0.467315	1.58886	0.667996	0.0165342	0.0441723	1.78162	0.8	0.62	0.97	0.73	0.6	0.88	0.24	0.96	1.43	1.44	0.78	0.9
ENSG00000279265.1	AC000123.2	-1.50482	-0.589589	0.17405	0.257544	-0.759327	-1.29918	-0.377603	0.25342	0.37181	-0.59616	2.46	2.11	5.23	5.95	2.78	3.49	1.07	2.59	2.81	2.07	2.03	2.58
ENSG00000280347.1	AC000123.3	-1.35523	-0.438538	0.0478428	0.0904827	-1.32018	-1.12595	-0.171143	0.313179	0.435737	-0.504207	2.53	2.62	4.1	4.26	2.71	2.76	1.9	1.91	3.05	2.68	2.46	2.67
ENSG00000279591.1	AC002044.2	-2.79509	-1.48289	0.000943319	0.00366504	-3.02534	-1.49592	-0.581034	0.0943197	0.174216	-1.0254	0.72	1.29	1.27	1.89	0.5	0.65	0.25	0.31	1.09	0.87	0.45	0.54
ENSG00000280092.1	AC002044.3	-1.89099	-0.919145	0.0201492	0.0445373	-1.69574	-1.22002	-0.286904	0.309563	0.431908	-0.509252	1.6	1.34	2.77	3.14	1.67	1.36	0.55	0.85	1.79	1.53	1.36	1.11
ENSG00000237813.3	AC002066.1	-1.92384	-0.943992	0.0011408	0.00426967	-2.94279	1.03897	0.055152	0.755597	0.824869	0.12171	1.59	1.4	2.18	2.34	0.81	1.24	0.79	0.75	1.4	1.44	1.69	1.93
ENSG00000267698.1	AC002116.2	-1.04926	-0.0693674	0.678619	0.757081	-0.168374	1.2402	0.310578	0.131651	0.226577	0.880577	1.83	2.03	1.91	2.33	1.89	2.04	2.08	1.43	2.42	1.61	2.67	2.24
ENSG00000268947.1	AC002128.1	-1.02063	-0.0294645	0.908528	0.93456	-0.0416618	1.09062	0.125145	0.549729	0.657299	0.259851	0.55	1.02	1.1	1.12	1.08	0.69	0.67	1.05	0.9	0.79	0.83	0.92
ENSG00000235560.3	AC002310.1	-1.05356	-0.0752673	0.699458	0.774036	-0.155238	1.09383	0.129394	0.342914	0.465682	0.464815	2.11	1.62	1.63	1.62	1.5	1.73	1.44	2.19	1.61	1.62	1.84	1.97
ENSG00000278993.1	AC002350.1	1.13232	0.179285	0.346905	0.44959	0.45979	1.03405	0.0483086	0.76682	0.834387	0.115307	0.7	0.57	0.65	0.7	0.57	0.74	0.81	0.7	0.62	0.5	0.56	0.69
ENSG00000276851.1	AC002401.4	-1.05537	-0.0777482	0.724181	0.793102	-0.140153	-1.48274	-0.568266	0.0209569	0.0532395	-1.67867	1.36	1.47	1.39	1.14	1.57	0.99	1.23	1.17	0.63	0.75	0.7	0.8
ENSG00000241764.3	AC002467.1	-1.50346	-0.588282	0.145001	0.222279	-0.838629	1.15251	0.204774	0.493164	0.606947	0.307009	2.88	3.48	2.13	1.44	2.2	0.98	1.59	1.82	2.4	2.69	2.27	2.26
ENSG00000239291.1	AC002558.1	-1.25755	-0.33062	0.10066	0.165899	-0.997142	-1.63674	-0.710823	0.0129403	0.0365382	-1.88806	1.48	1.81	2.23	2.89	1.84	1.81	1.34	1.33	0.81	0.88	1.52	1.19
ENSG00000262265.2	AC002558.3	-1.05259	-0.0739431	0.705217	0.778281	-0.151677	-1.37919	-0.46382	0.0739814	0.143808	-1.13088	0.74	1.05	1.28	1.35	0.95	1.18	0.96	1.29	0.98	0.55	0.48	0.84
ENSG00000236453.5	AC003092.1	1.64633	0.71925	0.0660872	0.117649	1.17988	3.14117	1.6513	0.00168204	0.00733348	2.77416	0.77	0.7	0.47	0.42	1.15	1.43	0.78	0.62	1.69	1.97	0.9	1.53
ENSG00000006025.12	AC003665.1	-1.15171	-0.20378	0.0102519	0.0255902	-1.98919	1.03997	0.0565432	0.341285	0.463865	0.466882	4.23	4.07	4.46	5.59	3.34	3.65	3.21	3.89	4.35	4.21	4.77	4.51
ENSG00000228113.7	AC003991.1	-1.25335	-0.325786	0.286219	0.384674	-0.543302	1.15358	0.206121	0.423109	0.543221	0.373548	0.76	1.07	1.51	2.23	0.93	1.35	0.68	1	1.39	1.11	1.2	1.49
ENSG00000237903.1	AC004000.1	-1.46401	-0.549929	0.0825222	0.141009	-1.08343	-1.24024	-0.310616	0.317851	0.440283	-0.497777	2.2	1.07	2.32	2.27	1.19	1.21	0.99	1.33	1.01	1.53	1.03	1.28
ENSG00000196656.7	AC004057.1	1.40862	0.494281	0.0566557	0.103651	1.24676	1.32985	0.411265	0.0740132	0.143835	1.13069	14.94	11.56	10.23	7.28	12.44	13.79	17.01	16.4	12.72	12.97	11.6	14.8
ENSG00000276449.1	AC004076.2	1.4916	0.57686	0.0121088	0.0293802	1.9169	-1.42443	-0.510387	0.0466579	0.0999451	-1.33107	0.26	0.25	0.41	0.26	0.39	0.46	0.36	0.48	0.25	0.14	0.15	0.18
ENSG00000263272.1	AC004148.2	1.03226	0.0458047	0.760524	0.822335	0.118887	1.08126	0.112714	0.449031	0.565826	0.347724	0.56	0.62	0.77	0.68	0.64	0.6	0.73	0.59	0.61	0.68	0.51	0.69
ENSG00000270168.2	AC004233.2	-1.10218	-0.140362	0.483785	0.582897	-0.315347	-1.31836	-0.398742	0.088369	0.165567	-1.0537	0.51	0.58	0.61	0.48	0.55	0.6	0.34	0.48	0.43	0.25	0.43	0.35
ENSG00000272079.2	AC004233.3	-4.50909	-2.17284	0.0143103	0.0336466	-1.84435	-2.01679	-1.01206	0.0766272	0.147748	-1.11562	0.22	0.2	0.82	0.63	0.14	0.11	0	0.1	0.05	0.13	0.09	0.22
ENSG00000146677.7	AC004453.1	1.01085	0.0155672	0.886902	0.917972	0.0521242	1.04194	0.0592758	0.626543	0.721566	0.203049	32.9	39.87	34.43	30.45	35.21	33.11	34.6	29.29	31.08	38.1	29.01	35.25
ENSG00000281530.1	AC004461.2	-1.24763	-0.319188	0.185036	0.27078	-0.732745	1.0173	0.0247422	0.885253	0.924024	0.0529324	1.04	1.38	1.8	1.39	1.02	1.66	0.91	0.84	1.34	1.1	1.24	1.19
ENSG00000274737.1	AC004466.2	-1.23611	-0.305806	0.275552	0.373437	-0.559797	-1.09596	-0.132192	0.611763	0.709965	-0.213417	1.97	2	1.31	2.82	1.88	1.82	1.18	1.24	1.67	1.48	1.46	1.44
ENSG00000105705.16	AC004475.1	1.00823	0.011818	0.836932	0.880148	0.07731	1.03094	0.0439641	0.422841	0.543095	0.373822	15.89	16.28	18.72	20.71	19.21	16.2	18.91	16.2	16.28	19.42	17.39	17.33
ENSG00000263412.1	AC004477.1	-1.36602	-0.449982	0.00397168	0.0117218	-2.40103	-1.34638	-0.429082	0.00977319	0.0291972	-2.00996	1.83	1.45	1.58	1.82	1.21	1.23	1.03	1.09	0.71	1.07	1.12	1.06
ENSG00000278765.1	AC004477.3	-1.55339	-0.635419	0.033234	0.0671439	-1.47842	-1.44025	-0.526315	0.1374	0.233986	-0.862013	1	1.57	1.73	1.05	1.1	0.67	0.78	0.68	1.03	0.81	0.88	0.39
ENSG00000279996.1	AC004491.1	-1.63213	-0.70676	0.0347026	0.0695383	-1.45964	-1.12775	-0.173448	0.631419	0.725791	-0.199682	0.31	0.39	0.54	0.26	0.16	0.23	0.2	0.24	0.42	0.13	0.3	0.29
ENSG00000272072.1	AC004492.1	-2.34391	-1.22892	0.00325979	0.00999607	-2.48681	-1.53688	-0.620005	0.0173427	0.0458497	-1.76088	0.87	1.1	1.37	1.21	0.7	0.81	0.31	0.2	0.4	0.59	0.78	0.66
ENSG00000266088.5	AC004585.1	1.02009	0.0286964	0.944261	0.960636	0.024908	-1.07965	-0.11056	0.741719	0.814445	-0.12976	0.68	0.61	0.35	0.49	0.25	0.55	0.51	0.86	0.37	0.43	0.26	0.44
ENSG00000275468.1	AC004678.1	1.42813	0.514132	0.0194123	0.0431796	1.71192	1.02237	0.0319241	0.877045	0.918195	0.0569781	0.68	0.5	0.65	0.79	0.89	0.85	0.95	0.92	0.48	0.62	0.44	0.64
ENSG00000285897.1	AC004687.2	-2.29305	-1.19727	0.434431	0.535435	-0.362079	3.71637	1.89389	0.118885	0.209339	0.924872	0.13	0.09	0.04	0	0.05	0	0	0.07	0.04	0.09	0.08	0.37
ENSG00000282936.1	AC004706.3	-1.2025	-0.266041	0.0209681	0.0459335	-1.67844	1.02743	0.0390358	0.6707	0.757849	0.173471	1.15	1.29	1.3	1.26	1.1	0.97	0.86	1.05	1.08	1.13	1.11	1.29
ENSG00000282943.1	AC004784.1	1.68537	0.753061	0.023751	0.0509005	1.62432	1.43233	0.51836	0.0471212	0.100744	1.32678	0.68	0.8	1.07	1.33	2.44	1.49	0.72	1.17	1.37	1.16	0.95	1.46
ENSG00000240399.1	AC004801.2	1.4188	0.504669	0.0665165	0.118249	1.17707	1.70555	0.770239	0.0141673	0.0390694	1.84871	0.5	0.63	1.09	0.98	0.89	1.12	1.67	1.29	2	1.19	1.83	0.66
ENSG00000250132.6	AC004803.1	-1.32056	-0.401148	0.0562421	0.103034	-1.24994	-1.30593	-0.385082	0.068701	0.135688	-1.16304	0.56	1.29	0.8	1.39	1.08	0.91	1.03	0.58	0.67	0.96	0.72	0.7
ENSG00000277283.1	AC004812.2	-1.05353	-0.0752321	0.653052	0.736208	-0.185053	1.03931	0.0556264	0.739106	0.812412	0.131293	1.66	2.21	1.79	1.48	1.48	1.6	1.61	1.77	1.42	1.63	1.81	1.79
ENSG00000259153.1	AC004816.1	-1.08401	-0.116373	0.593528	0.684777	-0.226559	1.17325	0.230509	0.295627	0.417454	0.529256	2.95	3.44	2.11	2.37	2.33	2.16	2.41	2.34	2.16	3.48	2.32	2.63
ENSG00000269927.1	AC004817.3	1.29755	0.37579	0.16003	0.24073	0.7958	-1.19063	-0.251722	0.363795	0.485623	-0.439143	0.27	0.31	0.18	0.27	0.39	0.37	0.29	0.25	0.18	0.17	0.16	0.18
ENSG00000249590.7	AC004832.3	-6.64122	-2.73145	0.000728322	0.00298387	-3.13768	-1.06725	-0.0938935	0.859362	0.905689	-0.0658237	0.68	1.6	0.9	0.54	0.19	0.12	0.15	0.09	0.22	0.95	1.13	0.56
ENSG00000258944.1	AC004846.2	-1.00789	-0.0113422	0.973116	0.982219	-0.0118352	1.07995	0.110965	0.651163	0.742469	0.18631	0.54	0.63	1.09	0.88	1.21	0.41	0.91	0.55	0.51	0.87	0.56	0.76
ENSG00000272768.1	AC004854.2	1.22614	0.29412	0.257218	0.353114	0.589698	1.06844	0.0954996	0.68522	0.769309	0.16417	0.28	0.47	0.35	0.42	0.43	0.67	0.37	0.35	0.42	0.26	0.28	0.36
ENSG00000244198.6	AC004889.1	-1.73566	-0.795482	0.000467479	0.00209318	-3.33024	1.31483	0.39488	0.00483897	0.0168521	2.31525	2.67	2.48	4.45	3.49	1.87	2.28	1.43	1.55	3.6	3.4	3.99	3.74
ENSG00000244560.7	AC004890.2	1.18073	0.239681	0.187773	0.273969	0.726367	1.07698	0.106991	0.554754	0.661766	0.255899	1.5	1.86	2.34	2.57	2.9	2.15	1.93	1.71	1.91	2.64	1.61	1.41
ENSG00000243797.6	AC004917.1	1.27714	0.352919	0.0719973	0.126159	1.14268	1.33471	0.416528	0.0428149	0.0934483	1.36841	1.59	1.79	2.31	2.96	3.19	3.15	2.19	2.5	2.17	2.95	2.14	2.94
ENSG00000270157.1	AC004918.3	-2.43917	-1.28639	7.55e-06	9.26e-05	-5.12209	-1.63998	-0.713675	0.000346484	0.00215695	-3.46032	1.99	2.01	2.66	2.71	0.97	0.9	0.79	1	1.27	1.1	1.34	1.24
ENSG00000284292.1	AC004922.1	-1.49448	-0.579647	0.0117871	0.0287541	-1.92859	1.55057	0.632795	0.0155345	0.0420067	1.8087	1.71	1.79	1.79	1.34	0.85	1.04	1.28	1.03	1.96	3.12	2.67	1.74
ENSG00000259209.3	AC004943.1	-1.89503	-0.922223	0.0203923	0.044952	-1.69053	-1.05955	-0.0834467	0.79657	0.858406	-0.0987763	0.7	0.7	1.08	1.75	0.91	0.39	0.26	0.57	0.72	0.52	0.8	1.32
ENSG00000259768.5	AC004943.2	-1.76352	-0.81846	0.00020475	0.00109772	-3.68878	1.05439	0.0764129	0.541406	0.65011	0.266477	0.89	0.93	1.34	1.4	0.63	0.61	0.64	0.52	1.11	1.03	1.1	1.01
ENSG00000228434.1	AC004951.1	-1.03823	-0.0541312	0.803331	0.854359	-0.0951057	1.02544	0.0362494	0.85485	0.902276	0.0681103	4.14	4.6	5.95	9.39	5.87	6.06	4.43	4.63	5.36	5.39	5.52	5.26
ENSG00000273432.1	AC004951.4	1.0605	0.0847476	0.816851	0.865043	0.0878569	1.45772	0.543718	0.187626	0.295239	0.726707	0.32	0.28	0.15	0.51	0.28	0.24	0.31	0.35	0.25	0.45	0.45	0.29
ENSG00000285725.1	AC004967.2	-1.4942	-0.579377	0.0015944	0.00562935	-2.7974	1.14245	0.192135	0.158974	0.26088	0.798674	2.91	3.57	4.04	5.02	2.39	2.36	2.5	2.38	4.27	3.56	3.94	4
ENSG00000205485.13	AC004980.1	-1.05447	-0.0765155	0.730108	0.797919	-0.136613	1.16826	0.224359	0.259165	0.378223	0.586424	2.17	2.4	4.25	3.21	4.49	2.34	1.73	1.84	3.47	3.98	1.95	3.03
ENSG00000214243.3	AC004980.2	-1.45823	-0.544219	0.285626	0.384072	-0.544203	1.37362	0.457981	0.356017	0.477877	0.448529	0.45	0.62	2.27	1.68	0.77	0.79	0.65	0.18	1.43	0.75	0.94	1.04
ENSG00000272732.1	AC004982.1	-1.30972	-0.38926	0.141974	0.218966	-0.847791	-1.19113	-0.252327	0.314143	0.436666	-0.502872	0.36	0.34	0.44	0.45	0.35	0.18	0.36	0.28	0.41	0.3	0.17	0.27
ENSG00000272894.5	AC004982.2	-1.10103	-0.138859	0.53144	0.627291	-0.274546	-1.06939	-0.096785	0.600073	0.700464	-0.221796	3.44	3.79	3.04	4.54	4.31	0.88	1.36	3.04	2.92	2.48	3.06	3.55
ENSG00000228532.4	AC005000.1	-1.15665	-0.209954	0.329589	0.431502	-0.482027	1.1478	0.198876	0.427406	0.5465	0.369159	5.15	6.49	5.92	4.89	5.61	4.87	5.3	3.24	6.64	6.57	6.56	3.53
ENSG00000270696.1	AC005034.3	-1.75168	-0.808739	0.00206588	0.0069482	-2.6849	-1.71667	-0.779617	0.000781346	0.00402036	-3.10716	2.99	2.55	4.18	4.43	2.09	2.38	1.35	1.81	2.04	1.66	1.79	1.6
ENSG00000272183.1	AC005041.3	-1.78696	-0.837511	0.0176815	0.0399835	-1.75248	-1.03394	-0.0481546	0.819093	0.87547	-0.0866666	1.16	1.55	1.26	1.12	0.64	0.39	1	0.65	1.19	0.82	0.99	1.19
ENSG00000227331.1	AC005042.1	-1.11383	-0.155525	0.437217	0.538081	-0.359303	1.34263	0.425057	0.0636666	0.127636	1.19609	2.31	2.29	4.1	3.3	3.21	3.09	2.06	2.09	4.63	2.7	3.23	3.6
ENSG00000267052.2	AC005050.1	1.29947	0.377919	0.0247376	0.0525487	1.60664	1.61837	0.69454	0.000325932	0.00205776	3.48687	2.3	2.54	3.67	4	4.39	3.93	3.75	3.41	4.36	4.82	4.17	4.31
ENSG00000272918.1	AC005070.3	-1.18664	-0.24688	0.292024	0.390821	-0.534582	1.44945	0.535508	0.00696773	0.0224105	2.15691	0.77	0.97	1.25	1.16	0.97	1.29	0.56	0.7	1.48	1.21	1.06	1.58
ENSG00000272219.1	AC005072.1	-1.22506	-0.292855	0.388272	0.490674	-0.410863	-1.36828	-0.452359	0.185551	0.292868	-0.731536	0.67	0.6	1.33	1.76	0.92	1.04	0.76	0.48	0.62	0.72	0.41	0.79
ENSG00000231595.1	AC005224.1	1.78288	0.834206	0.00138627	0.00501453	2.85815	1.34713	0.429891	0.0390007	0.0869509	1.40893	0.41	0.49	0.46	0.39	0.69	0.85	0.84	0.64	0.51	0.52	0.43	0.58
ENSG00000266378.1	AC005224.3	1.52456	0.608392	0.0216154	0.047084	1.66524	1.44678	0.532849	0.0101502	0.0300148	1.99352	0.44	0.58	0.89	0.86	1.36	1.1	0.71	0.89	0.87	0.84	0.81	0.86
ENSG00000266709.1	AC005224.4	1.19527	0.257336	0.221593	0.313385	0.654444	1.236	0.305675	0.0240422	0.0594346	1.61903	1.78	1.88	2.25	2.53	3.24	3.15	1.85	1.74	2.52	2.01	2.2	2.52
ENSG00000258603.3	AC005225.2	1.2183	0.28487	0.162849	0.24398	0.788214	1.70121	0.766561	0.00187625	0.00798217	2.72671	1.22	1.25	1.24	1.02	1.33	1.62	1.27	1.36	1.74	2.2	1.49	1.72
ENSG00000279026.1	AC005225.4	1.83892	0.87886	0.00735202	0.0194886	2.13359	1.88901	0.917631	0.00097679	0.00477555	3.0102	0.16	0.13	0.22	0.15	0.22	0.33	0.25	0.36	0.26	0.25	0.22	0.26
ENSG00000273314.1	AC005229.4	-1.44622	-0.532286	0.010775	0.0266591	-1.96758	1.03822	0.0541065	0.686633	0.770551	0.163275	1.3	1.49	1.37	1.38	1.05	0.66	1.05	0.95	1.11	1.4	1.48	1.15
ENSG00000268205.1	AC005261.1	1.28027	0.356444	0.00230865	0.00758355	2.63664	-1.01887	-0.0269763	0.741199	0.814097	-0.130065	9.03	9.34	11.2	11.83	13.85	13.51	11.75	12.82	10.03	9.38	9.31	10.17
ENSG00000268713.1	AC005261.3	1.20844	0.273147	0.134674	0.209987	0.870716	-1.15859	-0.212365	0.242489	0.359663	-0.615308	1.09	1.67	1.64	2.24	1.74	2.25	1.72	1.89	1.18	1.12	1.39	1.2
ENSG00000251537.4	AC005324.3	-1.02387	-0.0340377	0.887774	0.91858	-0.0516977	-1.02679	-0.0381359	0.872645	0.915763	-0.0591621	0.4	0.24	0.23	0.28	0.38	0.28	0.22	0.22	0.21	0.32	0.25	0.21
ENSG00000255104.8	AC005324.4	1.54	0.62293	0.211691	0.302515	0.674297	1.28537	0.362182	0.454382	0.570632	0.342579	0.48	0.67	1.14	0.94	0.53	1.07	0.76	1.14	0.56	0.9	0.83	0.81
ENSG00000274561.1	AC005332.3	-1.62549	-0.700872	0.00188213	0.00643582	-2.72535	-1.27351	-0.348816	0.0643878	0.128727	-1.1912	4.9	5.69	5.74	6.27	3.72	4.27	3.29	2.42	3.19	4.99	4.4	3.34
ENSG00000274712.1	AC005332.4	-1.42956	-0.515568	0.0189061	0.0422802	-1.7234	-1.27685	-0.352592	0.0693745	0.136756	-1.1588	0.94	0.93	1.04	1.58	1.04	0.75	0.65	0.58	0.67	0.96	0.74	0.68
ENSG00000277476.1	AC005332.5	-1.48271	-0.568233	0.000231109	0.00120125	-3.63618	-1.04501	-0.0635212	0.54674	0.6545	-0.262219	1.68	1.77	2.03	2.32	1.48	1.21	1.21	1.11	1.45	1.8	1.59	1.88
ENSG00000278730.1	AC005332.6	-1.16509	-0.220446	0.00847685	0.0218758	-2.07177	-1.20762	-0.272167	0.00109535	0.0052118	-2.96045	8.36	8.24	9.07	10.02	7.67	7.89	7.02	6.85	6.88	7.18	6.68	7.12
ENSG00000258559.2	AC005519.1	1.24098	0.31148	0.179746	0.264433	0.745341	1.5785	0.658553	0.00735792	0.0233355	2.13324	1.23	1.1	1.03	2.23	1.45	1.98	1.58	1.4	1.62	1.88	1.94	1.97
ENSG00000258653.3	AC005520.1	1.28677	0.363749	0.258029	0.353956	0.588332	1.2273	0.295487	0.432559	0.550931	0.363955	0.22	0.23	0.19	0.39	0.37	0.18	0.29	0.44	0.14	0.25	0.27	0.51
ENSG00000279809.1	AC005538.2	-1.41873	-0.504596	0.0131263	0.0313509	-1.88186	1.61247	0.68927	0.000313498	0.00199899	3.50376	2.29	2.84	2.54	3.02	1.96	1.92	1.25	2.25	4.61	3.34	3.52	4.21
ENSG00000214719.12	AC005562.1	-1.43881	-0.524881	0.0006121	0.00259573	-3.21318	-1.1411	-0.190425	0.0569586	0.11696	-1.24444	7.73	7.94	7.67	8.88	4.79	6.43	5.01	5.41	5.56	6.35	6.81	6.97
ENSG00000261596.2	AC005632.2	-1.17024	-0.2268	0.402092	0.504711	-0.395675	-1.32472	-0.405683	0.116213	0.205812	-0.934745	0.71	0.83	1.28	1.48	1.12	1.17	0.68	0.55	0.52	0.72	0.79	0.57
ENSG00000262633.2	AC005670.2	-1.71232	-0.77595	0.095665	0.159075	-1.01925	-1.79638	-0.845095	0.0842283	0.159105	-1.07454	0.24	0.13	0.45	0.45	0.1	0.26	0.11	0.13	0.06	0.09	0.12	0.12
ENSG00000261490.1	AC005674.2	1.31291	0.392765	0.110056	0.178245	0.958387	-1.03718	-0.0526722	0.796554	0.858406	-0.0987846	0.41	0.25	0.44	0.41	0.59	0.55	0.32	0.47	0.38	0.27	0.29	0.3
ENSG00000267526.1	AC005702.2	1.02236	0.0319103	0.8454	0.886749	0.072938	-1.27675	-0.352473	0.109398	0.195912	-0.960989	0.34	0.42	0.47	0.52	0.45	0.48	0.39	0.39	0.28	0.24	0.22	0.4
ENSG00000258472.8	AC005726.1	-1.25396	-0.326487	0.212242	0.303088	-0.673169	1.20628	0.270567	0.248485	0.366314	0.6047	0.6	0.92	0.79	1.55	0.6	0.88	0.61	0.79	1.24	1.08	0.88	0.9
ENSG00000279203.1	AC005785.2	1.40155	0.487025	0.172872	0.256152	0.762275	-1.02061	-0.0294299	0.942531	0.963503	-0.0257042	0.48	0.83	1.77	1.64	1.27	1.56	1.53	1.29	0.5	1.16	0.74	0.95
ENSG00000235554.1	AC005822.1	-1.09872	-0.135818	0.593286	0.68457	-0.226736	1.0492	0.0692927	0.765017	0.832936	0.116329	0.8	0.82	0.88	0.52	0.79	0.79	0.46	0.62	0.69	0.72	0.61	0.66
ENSG00000280202.1	AC005831.1	1.08141	0.112916	0.416145	0.518253	0.380755	-1.88907	-0.917673	0.00032827	0.00207007	-3.48377	2.68	2.16	3.53	3.51	3.12	3.26	2.68	3.02	1.59	1.19	1.18	1.56
ENSG00000255639.3	AC005833.1	1.24344	0.31434	0.109641	0.177715	0.960028	-1.27753	-0.353362	0.172752	0.277849	-0.762576	2.51	2.34	2.21	3.59	2.54	2.98	1.93	1.92	0.51	2.12	1.18	1.78
ENSG00000261335.1	AC005837.1	-1.70252	-0.767676	0.00323473	0.00993617	-2.49016	-1.56588	-0.646977	0.0136526	0.0380104	-1.86479	0.99	0.85	0.75	1.18	0.45	0.59	0.55	0.5	0.56	0.46	0.68	0.41
ENSG00000279089.1	AC005839.1	-1.28362	-0.36022	0.0162223	0.0373408	-1.78989	-1.174	-0.231434	0.0539145	0.112266	-1.26829	1.22	1.54	1.64	1.69	1.28	1.3	0.89	1.09	1.34	1.14	1.09	1.09
ENSG00000256433.2	AC005840.2	-2.02269	-1.01628	0.000974518	0.00376214	-3.01121	-2.02266	-1.01625	0.00117357	0.0055107	-2.93049	0.51	0.56	0.75	1.02	0.41	0.32	0.24	0.34	0.26	0.29	0.22	0.39
ENSG00000256913.1	AC005840.3	-1.15175	-0.203824	0.427443	0.528865	-0.369122	-1.29737	-0.375587	0.250918	0.369049	-0.600469	0.18	0.3	0.37	0.29	0.3	0.29	0.24	0.13	0.16	0.25	0.09	0.27
ENSG00000205325.1	AC005863.1	-1.18376	-0.24338	0.218504	0.309708	-0.660541	-1.61656	-0.692925	0.0151712	0.041219	-1.81898	0.68	0.59	0.55	0.54	0.55	0.38	0.49	0.49	0.27	0.32	0.47	0.23
ENSG00000236908.2	AC005865.1	1.40578	0.491367	0.0646878	0.115654	1.18918	-1.12754	-0.173178	0.516455	0.62812	-0.286967	0.29	0.26	0.53	0.53	0.56	0.61	0.86	0.46	0.24	0.31	0.22	0.68
ENSG00000227081.5	AC005912.1	1.51076	0.59527	0.0334457	0.0674875	1.47566	1.35098	0.434002	0.102121	0.185056	0.990884	11.11	5.94	8.3	6.78	8.89	12.58	13.46	12.31	8.34	8.97	12.44	8.42
ENSG00000275850.1	AC005912.2	1.21672	0.283002	0.679121	0.757484	0.168053	1.25375	0.326251	0.674872	0.761219	0.170778	0.04	0.11	0.24	0.3	0.16	0.15	0.08	0.12	0.1	0.14	0.07	0.07
ENSG00000278963.1	AC005921.3	-1.15027	-0.201975	0.17368	0.257137	-0.760251	-1.39003	-0.475112	0.00208656	0.00868178	-2.68057	1.48	1.35	1.67	1.61	1.73	1.38	1.07	1.05	0.95	1.15	0.93	0.85
ENSG00000267059.2	AC005943.1	1.15862	0.212411	0.0850328	0.144573	1.07041	1.02832	0.0402914	0.695325	0.777857	0.157812	17.09	17.74	19.32	24.74	23.02	19.01	21.14	23.24	17.48	19.56	18.85	19.52
ENSG00000229180.7	AC006001.3	-1.07781	-0.1081	0.444067	0.544812	-0.352552	1.12538	0.170416	0.200382	0.310634	0.698142	7.78	7.62	8.81	11.53	9.24	8.58	8.07	7.53	9.84	10.03	9.5	9.83
ENSG00000244563.1	AC006011.1	-1.21317	-0.27878	0.175017	0.25855	-0.756919	1.1172	0.159891	0.341392	0.46397	0.466747	12.91	16.24	21.99	21.76	17.47	16.79	13.5	10.74	17.67	16.29	17.84	20.54
ENSG00000229591.1	AC006017.1	-1.72126	-0.783465	0.234327	0.327775	-0.630177	1.63071	0.705501	0.288335	0.409289	0.540103	0.22	0.44	1.14	1.19	0.18	0.68	0.25	0.11	0.34	0.61	0.63	1.03
ENSG00000264324.1	AC006030.1	-2.5073	-1.32613	0.186556	0.272512	-0.729191	1.41909	0.504968	0.389743	0.511302	0.409222	0.09	0.14	0.03	0.13	0	0.07	0.02	0.13	0.11	0.06	0.12	0.1
ENSG00000233264.2	AC006042.3	1.66102	0.732072	0.0108743	0.0268599	1.9636	1.09267	0.127857	0.601291	0.701323	0.220915	0.44	0.66	1.1	1.09	1.54	1.36	0.97	1.17	0.64	0.68	0.73	0.86
ENSG00000261786.1	AC006058.1	-4.22764	-2.07985	5.65e-06	7.57e-05	-5.24819	-3.74026	-1.90314	5.12e-06	9.92e-05	-5.29082	1.94	2.04	3.17	3.33	0.72	0.69	0.46	0.47	0.72	0.56	0.54	0.66
ENSG00000272121.1	AC006058.3	-2.22997	-1.15702	0.000549194	0.00237754	-3.26027	-3.00073	-1.58531	0.00108988	0.00519058	-2.96262	0.82	0.78	0.6	0.74	0.34	0.31	0.3	0.25	0.19	0.28	0.23	0.06
ENSG00000269968.1	AC006064.4	-1.28871	-0.365926	0.275629	0.373479	-0.559675	-1.52821	-0.611841	0.0761681	0.147182	-1.11823	1.84	2.23	2.42	5.11	2.48	1.52	1.55	2.67	1.17	2.06	1.4	1.23
ENSG00000276232.1	AC006064.5	1.23966	0.30994	0.124802	0.197446	0.903779	-1.21197	-0.277352	0.131271	0.22607	-0.881831	1958.36	1797.45	1355.7	902.42	1479.99	1729.93	1966.26	2188.75	1304.08	1088.39	1220.03	1254.91
ENSG00000285238.2	AC006064.6	1.42128	0.507195	0.0126459	0.0304369	1.89805	-1.19967	-0.262632	0.135099	0.230975	-0.869347	6.08	5.11	5.72	3.79	6.88	7.33	7.56	5.6	3.77	4.16	4.28	3.5
ENSG00000263235.1	AC006111.2	1.57588	0.656155	0.00249073	0.00806225	2.60367	1.51027	0.594805	0.0101845	0.0300833	1.99206	1.24	1.17	1.23	1.19	1.9	1.54	2.04	1.91	1.84	2.01	1.18	1.61
ENSG00000264895.1	AC006141.1	-1.17745	-0.235663	0.236349	0.330089	-0.626447	-1.21616	-0.282338	0.120794	0.212092	-0.917954	2.32	2.36	3.88	4.15	2.84	2.97	2.08	2.11	2.38	2.2	2.11	2.35
ENSG00000159905.14	AC006213.1	1.94474	0.959579	0.000614529	0.00260331	3.21146	2.34316	1.22845	0.000123972	0.00100078	3.90668	0.47	0.6	0.97	0.63	1.21	1.54	1.13	1.19	1.73	1.2	1.55	1.22
ENSG00000278917.1	AC006213.7	1.65333	0.725375	0.00304162	0.00944548	2.5169	1.63509	0.709369	0.00384633	0.0140563	2.41495	0.17	0.21	0.33	0.31	0.47	0.33	0.38	0.37	0.35	0.36	0.28	0.41
ENSG00000243224.1	AC006252.1	-1.22561	-0.293503	0.284331	0.382868	-0.546175	-1.06367	-0.0890508	0.735262	0.809243	-0.133558	0.58	0.49	0.55	0.43	0.45	0.28	0.47	0.38	0.41	0.31	0.29	0.55
ENSG00000243696.5	AC006254.1	-1.38093	-0.465645	0.199176	0.287577	-0.700764	-1.33062	-0.412104	0.150668	0.250517	-0.82198	0.22	0.13	0.21	0.34	0.08	0.21	0.17	0.11	0.13	0.14	0.14	0.16
ENSG00000268460.1	AC006262.1	-1.15264	-0.204939	0.255204	0.350943	-0.593112	1.14277	0.192534	0.263104	0.382438	0.579873	1.56	1.33	1.05	1.14	1	1.3	1.01	0.94	1.19	1.62	1.22	1.1
ENSG00000232445.1	AC006329.1	1.51283	0.597249	0.00462397	0.0132273	2.33499	1.46573	0.551622	0.00863727	0.0264611	2.06362	6.52	6.85	8.6	4.89	11.02	9.17	9.71	8.84	9.36	7.86	8.18	9.78
ENSG00000280388.1	AC006330.1	-1.37614	-0.460632	0.000379466	0.00177673	-3.42083	1.11358	0.155209	0.0796492	0.152435	1.09882	3.33	3.35	3.93	3.42	2.51	2.35	2.55	2.25	3.34	3.74	3.61	3.31
ENSG00000272686.1	AC006333.2	-1.94666	-0.961	0.00659613	0.0178115	-2.18071	1.14614	0.196784	0.405086	0.526164	0.392453	1.17	1.26	0.8	0.85	0.55	0.33	0.57	0.54	0.95	1.04	1.27	0.84
ENSG00000277182.1	AC006449.5	-1.55477	-0.6367	0.0643321	0.115107	-1.19157	-1.13246	-0.179463	0.599288	0.699753	-0.222364	0.29	0.32	0.19	0.25	0.17	0.13	0.19	0.11	0.22	0.23	0.2	0.11
ENSG00000283196.2	AC006453.2	-45.3004	-5.50145	4e-07	1.26e-05	-6.39796	1.46142	0.54737	0.0218537	0.0549159	1.66047	2.2	2.01	1.99	1.59	0.05	0	0	0	2.22	2.7	2.82	2.1
ENSG00000273448.1	AC006480.2	-1.37088	-0.455105	0.0536888	0.0991871	-1.27012	-1.24422	-0.315239	0.112754	0.200842	-0.947868	0.93	1.06	1.02	0.92	0.68	0.87	0.46	0.8	0.53	0.71	0.66	0.89
ENSG00000279539.1	AC006486.2	1.1389	0.187635	0.657778	0.740154	0.181921	-1.20041	-0.263523	0.566417	0.67157	-0.246864	0.26	0.18	0.12	0.31	0.13	0.2	0.31	0.27	0.14	0.07	0.14	0.14
ENSG00000267575.6	AC006504.5	-68.0394	-6.0883	1.15e-08	1.51e-06	-7.94103	-49.0921	-5.61742	6.57e-09	1.17e-06	-8.18211	2.71	2.38	2.41	2.05	0	0	0	0	0	0	0	0
ENSG00000255581.1	AC006511.2	-1.16781	-0.223804	0.260819	0.356936	-0.583661	1.43331	0.519349	0.0328628	0.0759563	1.4833	2.61	2.96	2.89	2.31	2.13	1.83	2.38	2.54	4.71	3.78	2.57	3.11
ENSG00000279865.1	AC006511.3	-1.56939	-0.650204	0.0593948	0.107749	-1.22625	-1.30484	-0.383875	0.27638	0.396828	-0.558493	0.6	0.33	0.3	0.35	0.21	0.26	0.23	0.2	0.19	0.17	0.32	0.28
ENSG00000256682.2	AC006518.2	1.51225	0.596692	0.0830651	0.141748	1.08058	-1.5976	-0.675909	0.0437656	0.0951311	-1.35887	0.6	0.87	1.62	1.66	1.9	2.94	1.16	1.23	0.51	0.84	0.61	0.52
ENSG00000261342.1	AC006538.1	-1.48033	-0.565919	0.0363582	0.0721947	-1.4394	-1.098	-0.134882	0.449965	0.566734	-0.346822	1.22	1.42	1.31	1.16	0.73	0.58	1.13	0.93	0.93	0.82	1.16	1.24
ENSG00000267001.1	AC006538.2	-1.16476	-0.22003	0.568522	0.661654	-0.245253	1.07184	0.100095	0.678103	0.76357	0.168704	3.29	1.56	2.94	3.08	3.51	1.81	1.04	3.27	2.87	2.38	1.98	2.63
ENSG00000279352.1	AC006557.6	-1.19101	-0.252191	0.28758	0.386029	-0.541241	-1.03187	-0.0452677	0.880511	0.920781	-0.0552653	1.72	2.03	3.57	2.38	2.27	1.13	1.8	1.87	1.58	2.09	0.9	2.58
ENSG00000273203.1	AC006946.2	1.27813	0.354036	0.112478	0.181533	0.948931	-1.32851	-0.409804	0.0638301	0.127836	-1.19497	0.26	0.37	0.43	0.45	0.69	0.42	0.41	0.35	0.19	0.32	0.22	0.25
ENSG00000218586.3	AC006971.1	1.57668	0.65689	0.00318983	0.00981824	2.49623	1.35169	0.434767	0.0182056	0.0476816	1.73979	0.33	0.57	0.63	0.55	0.81	0.87	0.78	0.62	0.56	0.6	0.62	0.63
ENSG00000235859.5	AC006978.1	-1.29416	-0.372014	0.00923925	0.0235024	-2.03436	-1.06493	-0.0907622	0.502872	0.615579	-0.298543	1.73	1.85	2.3	2.1	1.77	1.55	1.39	1.3	1.92	1.72	1.33	1.7
ENSG00000281593.1	AC006978.2	-1.02412	-0.0343862	0.798548	0.851113	-0.0976991	1.24487	0.315999	0.0321446	0.0746199	1.49289	9.26	6.4	7.46	8.26	7.5	8.26	6.32	7.32	8.44	9.06	9.66	8.01
ENSG00000213542.3	AC007000.1	-1.24178	-0.312415	0.496748	0.595331	-0.303864	1.50361	0.588431	0.231825	0.347813	0.634841	0.26	0.91	0.6	0.85	0.4	0.88	0.3	0.25	0.36	0.6	0.78	1.04
ENSG00000273320.1	AC007032.1	-1.4031	-0.488623	0.154571	0.233937	-0.810872	1.46099	0.546947	0.0969044	0.178041	1.01366	1.09	1.08	0.89	0.56	0.86	0.64	0.4	0.58	1.09	1.19	0.81	1.47
ENSG00000229127.1	AC007038.1	-1.54611	-0.628647	0.0339901	0.0683644	-1.46865	-1.24089	-0.311379	0.186009	0.293412	-0.730466	0.57	0.49	0.84	0.89	0.7	0.45	0.27	0.36	0.51	0.33	0.49	0.6
ENSG00000272807.1	AC007038.2	-1.39985	-0.485273	0.0288179	0.0596433	-1.54034	1.05401	0.0758948	0.628699	0.72332	0.201558	1.55	1.53	2.48	2.27	1.78	1.2	1.27	1.08	1.74	1.82	1.7	1.8
ENSG00000258881.6	AC007040.2	-1.32409	-0.404999	0.00137848	0.00499082	-2.8606	-1.18484	-0.244689	0.060626	0.122897	-1.21734	0.96	0.95	1.11	1.24	0.77	0.79	0.78	0.68	0.96	0.84	0.69	0.71
ENSG00000261094.2	AC007066.2	1.03781	0.0535414	0.630054	0.717133	0.200622	1.18181	0.240997	0.052497	0.109987	1.27987	2.22	2.11	2.82	2.38	2.29	2.37	2.63	2.06	2.67	2.21	2.82	2.13
ENSG00000213443.2	AC007068.1	1.00263	0.0037858	0.988587	0.991957	0.00498511	-1.03428	-0.0486329	0.809205	0.867928	-0.0919414	1.06	1.33	1.09	1.06	1.15	0.9	0.82	1.74	0.97	0.72	0.99	1.12
ENSG00000229970.3	AC007128.1	1.01078	0.0154623	0.948255	0.96367	0.0230749	1.14174	0.191233	0.466634	0.582	0.331024	0.27	0.38	0.61	0.47	0.39	0.33	0.39	0.51	0.33	0.58	0.46	0.32
ENSG00000283549.1	AC007161.3	-1.07955	-0.110428	0.668722	0.749205	-0.174755	1.02838	0.0403771	0.877642	0.918598	0.0566826	2.05	2.89	2.51	1.44	2.32	1.59	2.09	1.85	1.96	2.62	1.88	1.63
ENSG00000242951.1	AC007182.2	-1.03292	-0.0467345	0.835025	0.878714	-0.0783004	1.30133	0.379982	0.167713	0.271877	0.775433	5.04	4.61	4.23	3.4	3.28	4.05	3.91	5.23	5.73	6.49	5.53	3.2
ENSG00000279407.1	AC007191.1	1.36344	0.447253	0.000257485	0.00130647	3.58925	-1.10863	-0.148778	0.161876	0.264317	-0.790818	1.67	1.43	1.6	1.83	2.2	2.15	1.99	2.07	1.18	1.49	1.23	1.38
ENSG00000268173.3	AC007192.1	1.92883	0.947729	0.102174	0.167831	0.990658	1.46719	0.553056	0.33432	0.456558	0.475838	3.71	2.9	0.59	0.99	2	3.18	2.96	3.95	1.76	1.49	3.08	2.68
ENSG00000261560.1	AC007216.3	1.16726	0.223127	0.305497	0.405674	0.514993	1.16643	0.222096	0.284237	0.40509	0.546319	0.96	0.75	1.35	0.79	1.15	1.06	0.83	1.23	0.88	1.08	0.82	1.08
ENSG00000231043.3	AC007238.1	-1.01802	-0.025762	0.916703	0.940401	-0.0377714	-1.24133	-0.311888	0.234094	0.350373	-0.63061	0.89	1.23	0.99	0.62	1.06	0.68	0.91	0.86	0.67	0.51	0.69	0.74
ENSG00000213090.2	AC007256.1	-1.01378	-0.0197389	0.93594	0.954924	-0.0287521	1.03795	0.053742	0.776831	0.842927	0.109673	0.36	0.58	0.6	0.62	0.69	0.73	0.36	0.36	0.63	0.43	0.45	0.44
ENSG00000269318.1	AC007292.2	-1.39037	-0.475474	0.289627	0.38832	-0.53816	-1.01834	-0.0262137	0.942595	0.963503	-0.0256747	0.23	0.38	0.44	0.77	0.54	0.17	0.42	0.15	0.36	0.59	0.19	0.34
ENSG00000172974.11	AC007318.1	1.02686	0.0382463	0.777907	0.835727	0.109072	1.05019	0.0706455	0.754157	0.823804	0.122538	1.72	1.97	1.84	1.87	1.94	1.65	1.87	1.86	1.36	2.52	1.95	1.26
ENSG00000283809.1	AC007326.4	1.68007	0.748517	0.000482873	0.00214727	3.31617	-1.23366	-0.302939	0.0836116	0.158426	-1.07773	1.01	1.12	1.3	0.91	1.66	1.96	1.78	1.67	0.66	0.86	0.76	0.81
ENSG00000261997.1	AC007336.1	-1.48035	-0.565938	0.00184882	0.00635142	-2.73311	1.2449	0.316028	0.0405548	0.0896038	1.39196	1.03	1.19	1.55	1.34	0.93	0.97	0.67	0.75	1.64	1.45	1.14	1.5
ENSG00000279722.1	AC007342.7	-2.82191	-1.49667	0.000163964	0.000918279	-3.78525	-1.15813	-0.211802	0.453544	0.569762	-0.343381	0.31	0.44	0.62	0.55	0.21	0.21	0.1	0.11	0.28	0.25	0.32	0.6
ENSG00000227946.1	AC007383.2	-1.4981	-0.583135	0.0551852	0.101385	-1.25818	-1.15011	-0.20177	0.493765	0.607454	-0.306479	1.09	1.54	1.49	0.92	0.53	0.9	0.94	0.82	0.97	1.44	0.54	0.93
ENSG00000272054.1	AC007390.2	-1.11849	-0.161557	0.479631	0.578904	-0.319092	1.25203	0.324265	0.170235	0.274684	0.768952	0.21	0.21	0.36	0.43	0.28	0.24	0.19	0.29	0.41	0.32	0.25	0.3
ENSG00000261799.1	AC007406.5	-1.1036	-0.142212	0.213438	0.304489	-0.670729	-1.96582	-0.97513	1.17e-05	0.000177122	-4.93361	1.07	1.17	1.48	1.45	1.31	1.14	0.94	1.05	0.55	0.52	0.65	0.57
ENSG00000279059.1	AC007485.2	-1.2329	-0.302061	0.101596	0.167117	-0.993125	-1.36562	-0.44956	0.0186261	0.0485286	-1.72988	1.67	1.51	1.45	1.64	0.99	1.18	1.47	1.27	1.25	0.77	1.05	1.01
ENSG00000280392.1	AC007496.3	-1.61634	-0.69273	0.00603003	0.016517	-2.21968	-1.0317	-0.0450209	0.748225	0.819395	-0.125968	1.4	1.6	2.1	2.03	1.39	1.22	0.66	1.05	1.66	1.56	1.2	1.76
ENSG00000277595.1	AC007546.1	1.34512	0.427738	0.101618	0.167136	0.993031	1.30732	0.386608	0.0626649	0.12615	1.20298	1.23	1.42	1.94	1.3	2.7	1.61	2.16	1.39	1.63	1.82	1.57	1.55
ENSG00000279356.1	AC007610.4	-1.34811	-0.430934	0.0134197	0.0319386	-1.87226	1.08314	0.115216	0.457692	0.573577	0.339427	1.11	1.22	1.68	1.82	1.15	1.12	0.84	0.98	1.52	1.38	1.07	1.5
ENSG00000242539.2	AC007620.2	-1.2938	-0.371619	0.0608254	0.10995	-1.21591	-1.04507	-0.0636012	0.659734	0.749261	-0.180631	1.15	1.65	2.08	1.84	1.59	1.33	0.89	1.51	1.14	1.19	1.35	1.57
ENSG00000270571.2	AC007681.1	-1.80776	-0.854204	0.00858057	0.0220801	-2.06648	-1.07492	-0.104224	0.683625	0.767896	-0.165182	0.17	0.27	0.34	0.44	0.17	0.19	0.1	0.16	0.32	0.22	0.2	0.2
ENSG00000224415.1	AC007683.1	-1.25761	-0.330687	0.32268	0.424757	-0.491228	-1.1367	-0.184846	0.531254	0.640806	-0.274698	1.33	2.35	2.44	1.5	1.53	0.82	2.17	1.28	1.78	0.94	1.13	1.88
ENSG00000241352.3	AC007688.1	-1.03926	-0.0555633	0.844089	0.885673	-0.0736119	1.09809	0.135003	0.54295	0.6516	0.26524	2.11	2.14	1.99	1.34	1.35	1.89	2.51	1.43	1.47	1.85	2	2.02
ENSG00000260743.1	AC007823.1	-1.01408	-0.0201741	0.931558	0.951579	-0.0307901	-1.06734	-0.0940236	0.629812	0.724289	-0.200789	0.37	0.35	0.36	0.47	0.26	0.48	0.33	0.39	0.32	0.3	0.31	0.25
ENSG00000269069.1	AC007842.1	2.65319	1.40773	7.65e-05	0.000509179	4.11662	1.90166	0.927257	0.000650937	0.00349908	3.18646	0.24	0.4	0.35	0.37	1.1	1.06	0.64	0.81	0.65	0.47	0.59	0.54
ENSG00000284837.1	AC007846.1	2.516	1.33113	7.32e-08	4.44e-06	7.13524	1.4391	0.525169	0.000710457	0.00374477	3.14846	1.95	2.11	2.47	2.12	5.32	5.61	4.92	4.84	2.8	3.27	2.61	2.55
ENSG00000242795.2	AC007849.1	-1.52387	-0.607736	0.0545599	0.100533	-1.26313	-1.31448	-0.394496	0.06928	0.136646	-1.15939	2.15	2.51	3.36	3.21	1.81	3.03	1.72	0.92	2.28	1.58	1.4	2.09
ENSG00000281195.1	AC007878.1	-1.23076	-0.299544	0.0230341	0.0496532	-1.63763	-1.02753	-0.0391772	0.72791	0.803418	-0.137923	7.5	7.79	9.94	9.99	7.8	7.24	6.05	5.84	9.24	7.29	7	8.17
ENSG00000234902.6	AC007879.3	-1.82052	-0.864351	0.00546767	0.0152269	-2.2622	1.02274	0.0324465	0.886289	0.924682	0.0524247	1.47	1.44	1.67	1.18	0.8	0.78	0.5	0.93	0.99	1.31	1.59	1.17
ENSG00000270953.1	AC007938.3	-1.55834	-0.640013	0.0560362	0.102727	-1.25153	1.08405	0.116433	0.63843	0.731883	0.194887	0.62	0.79	1.33	1.18	0.82	0.76	0.45	0.31	0.95	0.93	0.7	0.72
ENSG00000140455.17	AC007950.1	-1.04216	-0.0595811	0.234553	0.328033	-0.62976	-1.05211	-0.0732923	0.143641	0.242004	-0.842722	15.44	16.5	16.77	17.77	17.05	17.38	14.64	16.18	16.31	13.91	14.42	15.86
ENSG00000262202.4	AC007952.4	2.33168	1.22137	1.25e-05	0.000133221	4.90143	1.33716	0.419171	0.00918746	0.0278321	2.0368	13.04	10.13	9.36	9.27	25.57	22.18	25.24	19.53	13.07	12.01	12.61	12.64
ENSG00000233762.3	AC007969.1	1.30973	0.389266	0.108784	0.176432	0.963436	1.0998	0.137241	0.603358	0.702965	0.219425	2.16	3.75	2.53	2.06	3.49	3.33	3.65	2.85	2.34	3.01	1.76	2.93
ENSG00000277534.1	AC007996.1	-1.34008	-0.422323	0.00304558	0.00945378	-2.51633	-1.00123	-0.00176741	0.985589	0.990472	-0.00630421	1.76	1.6	1.83	2.25	1.22	1.5	1.24	1.29	1.79	1.69	1.47	1.73
ENSG00000257261.5	AC008014.1	1.0036	0.00518665	0.97368	0.982724	0.0115836	1.20655	0.270894	0.110971	0.198064	0.954789	3.92	4.54	5.18	4.52	5.72	6.74	6.23	3.3	8.71	5.7	6.45	5.24
ENSG00000239246.3	AC008026.1	-1.06696	-0.0935074	0.613542	0.703345	-0.212155	1.04543	0.064098	0.746231	0.81749	0.127127	5.22	8.02	8.98	6.98	5.58	7.85	6.05	7.16	7.28	7.08	7.82	5.06
ENSG00000264546.1	AC008026.3	-1.05676	-0.079649	0.868837	0.90428	-0.0610619	-1.22161	-0.288781	0.443245	0.560346	-0.353356	0.42	0.23	0.79	0.82	0.77	0.75	0.19	0.39	0.38	0.32	0.27	0.41
ENSG00000283041.1	AC008038.1	1.0253	0.0360413	0.624032	0.712071	0.204793	-1.06381	-0.0892383	0.243447	0.360711	-0.613596	21.65	24.69	21.64	20.61	22.1	21.32	22.45	22.01	20.28	19.89	18.63	20.72
ENSG00000233175.2	AC008105.1	-1.55091	-0.633115	0.0128377	0.0308254	-1.89151	-1.41245	-0.498198	0.0358782	0.0812696	-1.44517	0.42	0.53	0.49	0.56	0.22	0.2	0.19	0.34	0.33	0.34	0.29	0.32
ENSG00000275560.1	AC008115.3	1.21418	0.279987	0.115797	0.185741	0.936302	-1.15692	-0.210288	0.350282	0.473197	-0.455583	2.83	3.21	2.55	2.49	3.26	3.4	3.43	2.94	1.83	1.72	2.87	2.1
ENSG00000273015.2	AC008124.1	1.23136	0.300253	0.028279	0.0587006	1.54854	1.08823	0.121978	0.321947	0.444533	0.492216	0.6	0.44	0.49	0.49	0.67	0.57	0.55	0.56	0.53	0.52	0.45	0.48
ENSG00000257298.1	AC008147.2	-1.01353	-0.0193822	0.899325	0.927155	-0.0460832	1.21987	0.286723	0.00258309	0.0102809	2.58786	1.84	1.91	2.09	2.42	2.5	2.1	1.4	1.81	2.29	2.24	2.28	2.39
ENSG00000142235.9	AC008403.1	1.07906	0.109771	0.424691	0.526425	0.371927	1.26012	0.333565	0.0184677	0.0482103	1.73359	1.7	1.91	2.56	2.91	2.56	2.11	2.19	2	2.69	2.69	2.54	2.56
ENSG00000253785.1	AC008429.2	1.03269	0.0464114	0.825079	0.871818	0.0835042	1.14558	0.196073	0.357502	0.479427	0.446721	1.15	1.88	1.64	2.46	1.9	1.38	1.8	1.85	1.42	1.77	1.71	2.17
ENSG00000233937.6	AC008443.1	-1.06656	-0.092963	0.711125	0.78304	-0.148054	-1.46668	-0.552556	0.0283122	0.067527	-1.54803	1.94	1.88	2.7	3.08	2.55	2.38	2.45	1.39	1.49	1.5	1.58	1.31
ENSG00000249476.1	AC008467.1	-1.31222	-0.392004	0.042067	0.0814422	-1.37606	-1.20314	-0.266808	0.141928	0.239825	-0.847933	0.12	0.13	0.13	0.15	0.13	0.1	0.09	0.07	0.11	0.08	0.09	0.1
ENSG00000266910.2	AC008507.1	1.09852	0.135555	0.502803	0.60086	0.298603	1.05392	0.0757686	0.672984	0.759786	0.171995	1.5	2.64	2.7	2.62	2.91	2.84	2.42	1.81	2.31	2.18	2.09	2.02
ENSG00000285000.1	AC008581.2	1.16892	0.225171	0.350687	0.453232	0.45508	1.34959	0.432526	0.00633255	0.0207791	2.19842	3.62	3.06	3.88	2.76	2.6	4.32	3.01	5.18	4.4	3.66	4.12	4.19
ENSG00000268108.1	AC008687.2	-1.3485	-0.43136	0.210004	0.300582	-0.677772	-1.29149	-0.369039	0.283594	0.404427	-0.547302	1.29	1.35	3.46	3.33	1.5	1.98	1.24	1.31	1.16	1.22	1.37	1.81
ENSG00000268287.1	AC008687.3	-1.16276	-0.217557	0.330532	0.432631	-0.480786	-1.20589	-0.270095	0.298152	0.420211	-0.525562	1.11	0.84	1.27	1.69	1.01	1.1	1.01	0.8	0.94	0.86	0.86	0.57
ENSG00000283663.1	AC008687.8	-1.30565	-0.384766	0.240365	0.334285	-0.619129	-1.16427	-0.219425	0.46133	0.577141	-0.335988	0.49	0.46	0.36	0.26	0.32	0.39	0.19	0.23	0.27	0.22	0.3	0.3
ENSG00000249738.10	AC008691.1	1.42892	0.514921	0.013006	0.0311215	1.88586	1.38587	0.470794	0.00444719	0.0157588	2.35191	0.83	0.78	1	1.27	1.69	1.37	0.93	0.82	0.92	1.33	1.01	0.9
ENSG00000267475.1	AC008736.2	-1.1109	-0.151735	0.464103	0.564305	-0.333386	1.23763	0.307584	0.0920203	0.170894	1.03612	1.62	1.73	2.2	2.29	1.71	1.26	1.98	1.86	2.03	2.63	1.86	1.93
ENSG00000130749.10	AC008755.1	1.15055	0.202322	0.247316	0.342014	0.606747	-1.14613	-0.196777	0.23418	0.350452	-0.630451	11.36	11.24	15.32	17.12	15.63	17.61	13.98	11.27	12.3	11.09	10.29	11.48
ENSG00000269680.1	AC008760.1	-1.01561	-0.0223417	0.938179	0.956569	-0.0277144	1.2311	0.299948	0.306318	0.428577	0.513828	0.81	1.11	0.64	1.04	0.95	0.72	0.63	1.15	0.83	0.76	1.22	0.79
ENSG00000279977.1	AC008764.10	1.10074	0.138468	0.472192	0.572336	0.325881	1.04574	0.064521	0.71647	0.79408	0.144802	0.96	1.37	1.81	2.05	1.81	1.84	1.49	1.26	1.42	1.36	1.21	1.48
ENSG00000269399.2	AC008764.6	-1.30028	-0.378817	0.0947875	0.157885	-1.02325	-1.13991	-0.188921	0.318546	0.441086	-0.496828	0.68	1.02	0.72	0.75	0.62	0.55	0.71	0.45	0.72	0.58	0.57	0.57
ENSG00000279529.1	AC008764.8	1.17856	0.23702	0.142577	0.219686	0.845951	1.16791	0.223932	0.104346	0.188384	0.981523	0.53	0.52	0.76	0.61	0.7	0.72	0.56	0.79	0.65	0.58	0.62	0.61
ENSG00000249042.5	AC008771.1	-1.70092	-0.766312	0.000230814	0.00120087	-3.63674	-1.42808	-0.514081	0.0049271	0.0170772	-2.30741	3.96	5.03	4.54	3.75	2.81	2.45	2.38	2.26	2.55	2.84	3.08	2.51
ENSG00000260751.2	AC008870.2	1.10319	0.141686	0.622563	0.710704	0.205817	1.10991	0.150447	0.649334	0.741157	0.187532	0.64	0.6	0.6	1.55	0.79	0.76	0.9	0.81	0.79	0.49	0.94	0.69
ENSG00000279948.1	AC008895.1	1.08652	0.11972	0.62589	0.71331	0.203502	-1.25914	-0.332434	0.16214	0.26464	-0.790111	1.21	1.48	2.56	2.82	2.51	2.26	1.53	1.67	1.43	1.41	1.2	1.32
ENSG00000248734.2	AC008906.1	-1.07314	-0.101839	0.678224	0.756824	-0.168627	-1.22192	-0.289145	0.336347	0.458673	-0.473213	0.69	0.87	0.47	0.76	0.7	0.72	0.46	0.6	0.63	0.29	0.43	0.49
ENSG00000260136.5	AC008915.2	-1.2372	-0.307074	0.253151	0.348712	-0.596621	1.04705	0.0663265	0.812794	0.871142	0.0900195	1.67	1.69	1.25	1.21	1.01	1.1	1.42	1.03	0.94	1.51	1.57	1.46
ENSG00000279400.1	AC008957.3	-1.59912	-0.677279	0.0315841	0.0643648	-1.50053	-1.30616	-0.385327	0.130038	0.224309	-0.885929	0.92	1.06	1.87	1.8	1.11	1.16	0.57	0.58	1.06	0.84	0.67	1.14
ENSG00000247796.2	AC008966.1	-1.39456	-0.479806	0.00875378	0.0224473	-2.0578	-1.09192	-0.126861	0.38622	0.508124	-0.413166	0.95	1.11	0.94	0.97	0.65	0.62	0.7	0.84	0.94	0.84	0.78	0.69
ENSG00000176593.7	AC008969.1	1.31101	0.390683	0.00402924	0.0118463	2.39478	1.58675	0.666071	9.89e-05	0.000840642	4.00467	0.86	1.02	1.37	1.2	1.43	1.09	1.4	1.46	1.67	1.66	1.67	1.57
ENSG00000267751.5	AC009005.1	-1.62928	-0.704233	0.0134652	0.0320277	-1.87079	-1.58176	-0.661526	0.0307237	0.0720744	-1.51253	5.29	5.07	3.62	3.48	3.14	2.91	2.34	1.91	1.63	2.34	3.44	2.63
ENSG00000196696.12	AC009022.1	-1.60194	-0.679817	9.45e-05	0.000600646	-4.02463	-1.01029	-0.0147712	0.874502	0.916571	-0.0582391	6.79	7.23	9.44	10.05	5.17	5.09	4.36	5.43	8.03	7.76	7.23	7.46
ENSG00000274093.1	AC009032.1	-1.67403	-0.743323	0.0160942	0.0371041	-1.79333	-1.10807	-0.148046	0.567062	0.672136	-0.246369	2.44	4.2	6.07	5.3	2.51	2.93	2.29	2.13	4.06	3.42	2.59	3.54
ENSG00000214331.8	AC009053.1	-1.55166	-0.633812	0.0034991	0.0105974	-2.45604	-1.07272	-0.101269	0.469133	0.584388	-0.328704	11.47	10.69	14.24	17.27	9.46	8.67	7.49	7.31	12.44	12.18	11.09	11.96
ENSG00000270049.2	AC009061.2	-2.70404	-1.43512	0.0001326	0.000776104	-3.87746	-1.5892	-0.6683	0.00311322	0.0118782	-2.50679	1.85	1.73	1.9	2.17	0.34	0.84	0.56	0.67	0.78	0.88	1.2	1.21
ENSG00000280152.1	AC009078.3	-1.72728	-0.788498	0.000834922	0.00332797	-3.07835	-1.00478	-0.00688452	0.957361	0.973058	-0.0189241	1.97	2.23	2.76	3.35	1.69	1.55	1.14	1.19	2.43	2.22	2.28	2.27
ENSG00000279583.1	AC009086.3	1.11367	0.155316	0.492889	0.591664	0.307251	1.06332	0.0885742	0.615137	0.712794	0.211028	1.11	1.29	1.61	1.28	1.6	1.98	0.92	1.46	1.48	0.96	1.21	1.31
ENSG00000260060.1	AC009088.1	1.1595	0.213507	0.445086	0.545814	0.351557	-1.03213	-0.0456263	0.84772	0.896669	-0.0717476	0.91	1.15	2.08	1.81	2.31	1.96	1.32	1.05	1.07	1.39	0.94	1.34
ENSG00000279803.1	AC009090.5	-1.5925	-0.671293	0.0330673	0.0668701	-1.4806	1.06583	0.0919766	0.704222	0.784693	0.152291	0.25	0.34	0.39	0.64	0.36	0.22	0.22	0.16	0.28	0.42	0.4	0.32
ENSG00000284671.1	AC009093.9	1.16961	0.226034	0.404073	0.506766	0.39354	1.54876	0.631118	0.0189792	0.0492239	1.72172	0.54	0.89	0.58	0.69	0.49	0.93	0.82	0.84	1.2	0.84	0.68	1.05
ENSG00000260198.1	AC009102.1	-1.70554	-0.770227	0.00787736	0.0206179	-2.10362	-1.1833	-0.242811	0.415021	0.535675	-0.38193	0.6	0.73	0.98	1.22	0.7	0.57	0.37	0.36	0.9	0.57	0.35	0.86
ENSG00000279764.1	AC009102.3	-2.01854	-1.01331	0.00874705	0.0224407	-2.05814	-1.18635	-0.246528	0.441929	0.559124	-0.354648	0.47	0.65	1.17	1.29	0.44	0.56	0.3	0.29	0.82	0.52	0.7	0.42
ENSG00000259877.2	AC009113.1	-2.109	-1.07656	0.000171822	0.000950775	-3.76492	-1.07538	-0.104852	0.525318	0.635588	-0.279578	0.88	0.67	1.05	0.83	0.44	0.33	0.44	0.34	0.74	0.83	0.65	0.6
ENSG00000276131.1	AC009118.2	-1.71117	-0.774981	0.00233521	0.00765064	-2.63167	-1.25493	-0.327603	0.147251	0.246399	-0.831942	1.72	1.98	1.61	1.56	1.14	1.09	0.83	0.82	1.3	0.87	1.14	1.51
ENSG00000276259.1	AC009118.3	-1.14826	-0.199454	0.582215	0.673812	-0.234917	1.49944	0.58442	0.180667	0.286857	0.743121	0.39	0.35	0.9	0.94	0.61	0.48	0.57	0.28	0.8	1.31	0.52	0.46
ENSG00000239763.2	AC009120.1	-1.57695	-0.657139	0.00203607	0.00686873	-2.69121	-1.06383	-0.0892629	0.593172	0.694487	-0.22682	3.02	3.41	3.41	4.57	2.26	2.3	1.96	2.2	3.47	2.74	2.48	3.12
ENSG00000259972.2	AC009120.2	-1.39216	-0.477322	0.00652062	0.01764	-2.18571	-1.25069	-0.322721	0.00733259	0.0232757	-2.13474	3.4	3.15	3.58	4.69	3.59	2.8	1.71	2.44	2.86	2.81	2.41	2.93
ENSG00000275236.1	AC009120.5	-2.61881	-1.38891	0.00440355	0.0127098	-2.3562	-1.15791	-0.211528	0.597063	0.697766	-0.22398	0.31	0.17	0.49	0.46	0.09	0.17	0.1	0.06	0.11	0.3	0.26	0.23
ENSG00000250685.7	AC009123.1	-3.84078	-1.9414	7.74e-07	1.88e-05	-6.11106	-1.52147	-0.605468	0.00340982	0.0127734	-2.46727	1.5	1.34	0.93	1	0.24	0.24	0.21	0.28	0.66	0.56	0.64	0.46
ENSG00000247121.6	AC009126.1	-1.1394	-0.188276	0.367611	0.470035	-0.434611	-1.28186	-0.358242	0.137404	0.233986	-0.862001	0.26	0.32	0.26	0.26	0.22	0.28	0.2	0.22	0.16	0.17	0.14	0.32
ENSG00000238045.9	AC009133.1	1.00387	0.00556734	0.987481	0.991515	0.00547126	1.25139	0.32353	0.423412	0.543391	0.373237	0.41	0.47	0.95	0.87	0.6	0.61	0.63	0.61	0.5	0.63	0.7	1.05
ENSG00000260495.1	AC009148.1	-1.97363	-0.980849	0.000143901	0.000827381	-3.84194	-1.23262	-0.301728	0.0417416	0.0916057	-1.37943	0.67	0.86	0.9	1.07	0.55	0.37	0.34	0.43	0.66	0.55	0.58	0.68
ENSG00000261476.1	AC009163.3	-1.82895	-0.871016	0.00139233	0.00503197	-2.85626	-1.19643	-0.25873	0.179177	0.285199	-0.746718	1.81	2.15	2.29	3.28	1.75	1.09	1.13	1.02	1.53	1.76	2.1	1.46
ENSG00000274220.1	AC009163.6	-2.08813	-1.06221	0.000163196	0.000915559	-3.78729	1.0632	0.0884101	0.67924	0.764312	0.167977	0.75	0.58	0.66	0.65	0.32	0.29	0.26	0.34	0.62	0.79	0.69	0.43
ENSG00000227292.1	AC009229.1	3.33388	1.7372	4.94e-05	0.000367971	4.30615	1.94685	0.961144	0.00455188	0.0160338	2.34181	0.93	0.91	1.4	1.05	4.7	4.35	2.46	3.13	1.77	1.12	2.22	2.17
ENSG00000280276.1	AC009229.4	8.15272	3.02728	0.000124593	0.000739204	3.90451	3.53805	1.82296	0.0134513	0.0376597	1.87124	0.05	0.12	0.2	0.28	1.11	1.1	0.74	0.73	0.41	0.28	0.29	0.21
ENSG00000230383.1	AC009245.1	1.16071	0.21501	0.0800622	0.137595	1.09657	1.07785	0.108155	0.234636	0.350978	0.629605	17.54	21.78	21.89	18.62	21.53	23.35	24.25	18.46	19.63	20.89	18.89	21.06
ENSG00000274297.1	AC009269.5	-1.50991	-0.594459	0.327504	0.429501	-0.484784	1.45384	0.539868	0.209043	0.320703	0.679765	0.47	0.53	1.44	1.58	1.18	0.75	0.55	0.07	0.96	0.68	1.14	1.11
ENSG00000273297.1	AC009275.1	-1.40481	-0.490377	0.131246	0.205652	-0.881914	1.08746	0.120969	0.699973	0.781673	0.154919	1.98	1.22	1.27	0.96	0.84	0.66	0.8	0.86	1.04	1.23	1.5	0.99
ENSG00000273576.1	AC009283.1	-1.10523	-0.144343	0.497208	0.595745	-0.303462	-2.0806	-1.057	0.000824637	0.00420255	-3.08374	1.29	1.56	2.22	2.39	1.94	1.97	1.27	1.25	0.96	0.59	0.61	0.69
ENSG00000233868.1	AC009302.1	1.17922	0.23783	0.210862	0.301543	0.676001	1.10858	0.148717	0.536542	0.64587	0.270396	2.4	3.62	4.59	3.73	4.57	4.53	3.58	3.76	2.97	5.13	2.61	3.48
ENSG00000279227.1	AC009303.4	-1.51538	-0.599677	0.0203363	0.0448773	-1.69173	1.08045	0.111627	0.578851	0.682743	0.237433	0.51	0.63	0.65	0.5	0.39	0.28	0.35	0.43	0.44	0.5	0.5	0.7
ENSG00000274315.1	AC009318.3	1.34265	0.425086	0.211543	0.302338	0.674601	-1.43657	-0.522631	0.101521	0.184281	-0.993446	1.62	0.92	2	1.23	3.26	1.8	1.39	1.3	0.78	0.51	0.72	0.91
ENSG00000278500.1	AC009336.2	1.24644	0.317814	0.255703	0.351481	0.592264	-1.11103	-0.151898	0.682052	0.766538	-0.166182	0.16	0.13	0.21	0.11	0.23	0.19	0.2	0.12	0.17	0.04	0.15	0.1
ENSG00000216895.9	AC009403.1	-1.26006	-0.333489	0.0344336	0.0690678	-1.46302	1.21462	0.280501	0.0218408	0.054892	1.66073	7.92	9.05	7.93	6.48	5.56	4.56	6.2	5.8	10.46	10.05	8.64	9.9
ENSG00000236255.1	AC009404.1	-1.20434	-0.26824	0.263736	0.360107	-0.578831	1.13771	0.186129	0.433011	0.551286	0.363501	0.54	0.75	0.74	0.93	0.58	0.47	0.54	0.43	0.68	0.49	0.54	1.02
ENSG00000286075.1	AC009412.1	1.45481	0.540827	2.3e-05	0.000207951	4.6387	1.10463	0.143557	0.0256804	0.0625751	1.5904	9.21	9.07	8.9	8.59	12.35	11.59	13.46	12.56	9.19	9.43	9.24	9.24
ENSG00000226121.2	AC009487.2	1.24247	0.313214	0.0447517	0.0856066	1.34919	1.23937	0.309606	0.0815857	0.155342	1.08839	0.25	0.36	0.41	0.39	0.41	0.37	0.43	0.43	0.44	0.33	0.43	0.33
ENSG00000270437.1	AC009501.2	-2.18559	-1.12803	0.0156667	0.0362733	-1.80502	-1.87769	-0.908961	0.0134232	0.0376009	-1.87214	0.41	0.5	0.56	0.67	0.08	0.44	0.29	0.19	0.47	0.16	0.13	0.2
ENSG00000227308.2	AC009502.1	-1.16459	-0.219827	0.19985	0.28829	-0.699296	1.56109	0.642556	0.000335987	0.0021129	3.47368	3.27	4.2	4.3	4.24	5.12	4.44	2.79	3.15	5.58	7.28	6.26	6.72
ENSG00000224152.1	AC009506.1	-1.40589	-0.491481	0.0142124	0.0334759	-1.84733	-1.15758	-0.211112	0.361674	0.483522	-0.441683	0.65	0.79	0.83	0.95	0.53	0.51	0.48	0.64	0.57	0.6	0.87	0.42
ENSG00000111788.10	AC009533.1	1.01272	0.0182297	0.827964	0.873669	0.0819884	-1.43045	-0.516471	0.000195871	0.00140705	-3.70803	2.35	2.49	2.79	3.15	2.79	2.64	2.3	2.51	1.83	1.76	1.69	1.57
ENSG00000258056.2	AC009779.2	-1.02842	-0.040431	0.812371	0.861472	-0.0902457	-1.30336	-0.382238	0.0249855	0.061293	-1.60231	2.53	2.2	2.39	2.06	1.96	1.75	2.49	2.29	1.54	1.65	1.72	1.32
ENSG00000258311.5	AC009779.3	-1.22144	-0.288583	0.17802	0.262315	-0.749532	1.29494	0.37289	0.0647286	0.129344	1.1889	0.4	0.43	0.68	0.4	0.33	0.25	0.33	0.45	0.36	0.6	0.82	0.55
ENSG00000270277.1	AC009948.2	-1.33439	-0.416185	0.023243	0.0500369	-1.63371	1.12728	0.172841	0.204478	0.315485	0.689354	1.75	1.98	2.73	2.54	1.83	2	1.28	1.38	2.48	2	2.06	2.46
ENSG00000270956.1	AC009948.3	-1.68395	-0.751852	0.0214915	0.0468897	-1.66773	1.26195	0.335654	0.156608	0.257874	0.805187	3.13	1.52	2.98	2.74	1.58	1.48	1	1.73	2.99	2.83	2.91	2.42
ENSG00000279598.1	AC009948.4	-1.2775	-0.353325	0.0463986	0.0881116	-1.3335	1.03038	0.0431796	0.668414	0.756121	0.174954	1.34	1.42	1.84	1.82	1.46	1.42	0.86	1.07	1.43	1.55	1.31	1.57
ENSG00000279166.1	AC009951.1	1.37353	0.457886	0.0665192	0.118249	1.17705	1.28582	0.362689	0.120672	0.211902	0.918393	0.32	0.25	0.47	0.4	0.67	0.52	0.34	0.4	0.43	0.3	0.36	0.5
ENSG00000226266.6	AC009961.1	-1.22255	-0.289888	0.126812	0.200118	-0.89684	-1.14122	-0.190572	0.347864	0.470567	-0.458591	1.17	1.35	1.14	1.42	0.94	0.59	0.6	0.22	1.01	0.71	0.91	0.47
ENSG00000260742.1	AC009962.1	-1.54124	-0.62409	0.0214545	0.0468279	-1.66848	-1.08352	-0.115724	0.678688	0.763906	-0.16833	0.16	0.21	0.16	0.15	0.14	0.11	0.08	0.1	0.21	0.09	0.13	0.13
ENSG00000259659.1	AC009996.1	1.22509	0.292893	0.237207	0.330888	0.624873	1.33523	0.41709	0.261193	0.380211	0.583038	1.04	0.79	0.87	0.72	1.15	0.84	1.1	0.94	1.24	1.22	0.44	1.18
ENSG00000256646.7	AC010132.3	1.0625	0.0874573	0.319475	0.421395	0.495563	-1.1575	-0.211013	0.0775156	0.149066	-1.11061	6.27	7.15	6.25	5.94	6.71	6.13	6.06	6.72	5.75	4.91	5.6	4.45
ENSG00000214772.2	AC010168.1	1.24528	0.316475	0.0521896	0.0969929	1.28242	1.01316	0.0188588	0.914182	0.944733	0.0389675	2	2.59	2.35	2.2	2.9	2.56	2.69	2.78	2.58	2.02	1.67	1.9
ENSG00000261324.2	AC010168.2	1.00071	0.00102761	0.990994	0.99351	0.00392884	-1.299	-0.377397	0.00391514	0.0142459	-2.40725	0.57	0.68	0.75	0.73	0.7	0.68	0.63	0.59	0.5	0.47	0.4	0.48
ENSG00000256594.8	AC010186.2	-1.95189	-0.96487	8.3e-05	0.000543082	-4.08083	-1.46009	-0.546062	0.00138344	0.00626742	-2.85904	1	1.44	1.41	1.65	0.84	0.65	0.52	0.68	0.83	0.93	0.53	0.72
ENSG00000257027.1	AC010186.3	-1.80638	-0.853101	0.000884718	0.0034785	-3.0532	-2.04311	-1.03077	0.00149383	0.00666557	-2.8257	1.15	0.78	0.98	0.89	0.52	0.43	0.49	0.55	0.25	0.53	0.48	0.4
ENSG00000285517.1	AC010198.2	1.19129	0.252528	0.0154852	0.0359251	1.81008	-1.42984	-0.515858	0.000176849	0.00129971	-3.7524	7.94	10.52	9.7	11.93	10.61	11.05	9.11	11.29	6.81	6.35	5.79	6.65
ENSG00000257803.2	AC010200.1	1.15437	0.207105	0.234921	0.328464	0.629078	-1.02087	-0.0298035	0.867991	0.911958	-0.0614847	1.37	1.45	2.04	2.23	2.44	2.17	1.47	1.89	2	1.25	1.4	1.45
ENSG00000257489.6	AC010203.1	-1.33998	-0.422214	0.011382	0.0279106	-1.94378	1.31845	0.39884	0.00766714	0.0240984	2.11537	2.86	2.89	3.75	2.63	1.97	1.74	2.07	1.51	3.75	3.22	3.02	3.24
ENSG00000260633.1	AC010207.1	-1.08834	-0.122134	0.596057	0.687301	-0.224712	-1.1942	-0.256049	0.18138	0.287761	-0.741411	0.48	0.6	0.75	0.57	0.38	0.63	0.63	0.48	0.42	0.45	0.52	0.36
ENSG00000270804.1	AC010326.4	1.16646	0.222138	0.294135	0.393225	0.531453	-1.01741	-0.024903	0.908037	0.940476	-0.0418963	3.66	3.16	2.19	4.11	3.77	4.45	3.35	3.96	2.48	3.34	2.31	3.46
ENSG00000267577.1	AC010327.3	1.28051	0.356718	0.130285	0.204503	0.885105	-1.01633	-0.023371	0.915486	0.945594	-0.0383485	1.08	0.91	0.73	0.75	0.97	1.02	1.07	1.25	0.61	0.73	0.82	0.83
ENSG00000276570.1	AC010327.5	-1.14883	-0.200163	0.163852	0.245255	-0.785549	1.00591	0.00849591	0.94002	0.962037	0.026863	1.03	1.13	1.16	1.56	1.25	1.02	0.98	0.8	1.11	1.09	0.97	1.15
ENSG00000214248.2	AC010336.1	1.03457	0.0490301	0.785348	0.841255	0.104938	-1.09114	-0.125839	0.528148	0.637974	-0.277245	0.27	0.39	0.27	0.37	0.3	0.33	0.29	0.36	0.22	0.29	0.31	0.22
ENSG00000286138.1	AC010336.8	1.29456	0.372464	0.188899	0.275278	0.72377	1.38298	0.467776	0.123959	0.216225	0.906721	0.36	0.75	0.76	0.49	0.91	0.61	0.79	0.55	0.68	0.8	0.72	0.47
ENSG00000240376.1	AC010343.1	1.02391	0.0340887	0.795664	0.849195	0.0992701	1.05406	0.0759534	0.576937	0.681114	0.238872	3.57	4.91	4.51	4.41	4.48	4.26	4.78	3.83	3.55	4.72	3.85	4.22
ENSG00000269242.1	AC010422.3	-1.34665	-0.429377	0.155696	0.235332	-0.807722	-1.61098	-0.687937	0.148571	0.247933	-0.828067	0.96	1.05	1.25	0.64	0.46	0.78	0.74	0.67	0.82	0.42	0.75	0.15
ENSG00000269693.1	AC010422.6	-1.63099	-0.705744	0.431991	0.533229	-0.364525	1.44744	0.533506	0.296056	0.417913	0.528626	0.06	0.08	0.24	0.08	0.21	0.02	0.2	0	0.08	0.17	0.06	0.26
ENSG00000285589.1	AC010422.8	1.14489	0.195207	0.138281	0.214414	0.859237	1.25773	0.330819	0.0236677	0.0586176	1.62584	1.05	0.99	0.86	0.96	0.94	1.1	1.09	1.07	1.04	1.03	1.02	1.3
ENSG00000279557.1	AC010435.1	-1.54823	-0.630617	0.0204595	0.0450815	-1.68911	-1.20324	-0.266925	0.188038	0.295741	-0.725755	0.57	0.84	0.94	1.19	0.8	0.49	0.48	0.37	0.71	0.6	0.54	0.59
ENSG00000188242.4	AC010442.1	-1.12216	-0.166279	0.0417995	0.081036	-1.37883	-1.46125	-0.547198	8.2e-05	0.000727097	-4.08631	9.6	11.85	9.3	11.01	9.6	7.78	7.95	8.13	7.16	7.31	6.26	5.66
ENSG00000214784.4	AC010468.1	1.11063	0.151372	0.503211	0.601157	0.29825	-1.25637	-0.329265	0.160255	0.262314	-0.795187	1.14	0.95	1.32	1.09	1.17	0.87	1.28	1.49	0.8	1	0.74	0.52
ENSG00000261360.1	AC010491.1	-1.28592	-0.362799	0.0701177	0.1234	-1.15417	-1.66084	-0.731917	0.000231012	0.00158556	-3.63637	1.06	0.91	0.92	1.11	0.66	0.54	0.76	0.91	0.59	0.51	0.47	0.44
ENSG00000275234.1	AC010503.4	-1.55942	-0.641014	0.0167436	0.0382903	-1.77615	1.0473	0.0666783	0.724543	0.800744	0.139936	9.42	8.92	8.13	5.9	4.15	4.14	5.58	6.04	8.47	6.34	7.19	8.96
ENSG00000268750.6	AC010522.1	1.65197	0.724184	0.0869116	0.147026	1.06092	1.3345	0.416304	0.272177	0.392343	0.565149	1.09	1.08	0.59	0.56	1.54	1.31	2.1	0.74	0.52	1.13	1.06	0.78
ENSG00000226180.3	AC010536.1	-1.25744	-0.33049	0.160896	0.241794	-0.793456	-1.0505	-0.0710699	0.707984	0.787185	-0.149976	1.2	1.14	1.86	2.38	1.48	1.47	0.97	0.95	1.43	1.38	1.19	1.29
ENSG00000275734.2	AC010538.1	-2.50388	-1.32417	0.00113051	0.00424002	-2.94672	1.33322	0.414912	0.0565874	0.116422	1.24728	0.28	0.32	0.41	0.65	0.21	0.1	0.18	0.11	0.43	0.51	0.44	0.46
ENSG00000247324.2	AC010547.1	-1.39323	-0.478435	0.115757	0.185714	-0.936452	1.00574	0.00826322	0.977355	0.985696	0.00994758	0.2	0.6	0.12	0.19	0.1	0.12	0.14	0.08	0.32	0.12	0.61	0.12
ENSG00000261611.6	AC010547.4	-1.27214	-0.347256	0.416047	0.51817	-0.380858	2.10087	1.07099	0.0051011	0.0175661	2.29234	0.17	0.09	0.14	0.26	0.05	0.18	0.09	0.18	0.35	0.23	0.22	0.36
ENSG00000130313.7	AC010618.1	1.12983	0.176105	0.100336	0.165469	0.998542	-1.03666	-0.0519382	0.571392	0.675766	-0.243066	14.08	14.8	12.41	15.32	15.27	13.69	16.97	14.57	12.21	11.61	13.8	12.99
ENSG00000269439.5	AC010618.4	1.32513	0.406135	0.197712	0.285843	0.703966	1.16462	0.219859	0.434497	0.552558	0.362013	0.61	1.07	1.59	0.8	1.45	1.97	1.32	0.7	0.96	0.91	0.99	1.14
ENSG00000283103.2	AC010642.2	-1.07836	-0.108833	0.688493	0.764777	-0.1621	-1.17832	-0.236731	0.37176	0.493868	-0.429737	0.8	0.63	0.52	0.46	0.51	0.41	0.61	0.6	0.33	0.48	0.53	0.44
ENSG00000277369.1	AC010654.1	-1.06509	-0.0909742	0.70197	0.775714	-0.153681	-1.1378	-0.186243	0.350619	0.473525	-0.455164	2.8	1.71	2.26	2.42	2.54	1.94	2.54	1.36	1.55	1.57	1.72	2.2
ENSG00000232383.1	AC010677.1	-1.37184	-0.456111	0.116368	0.186437	-0.934166	-1.42558	-0.511551	0.183512	0.290336	-0.736336	2.28	4.08	2.66	2.07	1.91	1.72	2.06	1.7	0.73	1.67	2.44	1.86
ENSG00000270574.1	AC010680.2	-1.39928	-0.48468	0.0107977	0.0267114	-1.96667	-1.07758	-0.107792	0.37567	0.49774	-0.425193	1.42	1.44	1.82	1.55	1.31	1.33	0.78	0.99	1.31	1.09	1.39	1.34
ENSG00000271011.1	AC010680.3	1.11314	0.154636	0.474524	0.574474	0.323742	1.41333	0.499096	0.0570902	0.117155	1.24344	1.54	1.82	1.99	1.53	2.3	2.34	1.32	1.72	2.4	2.6	1.37	2.29
ENSG00000271141.1	AC010680.4	-1.12738	-0.172971	0.366265	0.468939	-0.436204	1.06418	0.0897416	0.638743	0.732137	0.194674	1.89	2.3	2.03	2.53	2.24	1.52	2.12	1.69	2.01	1.6	1.92	2.65
ENSG00000267520.2	AC010733.2	-1.27997	-0.356108	0.0162035	0.0373144	-1.79039	-1.08206	-0.113783	0.353805	0.476158	-0.451236	4.32	4.73	6.29	6.29	4.2	4.48	3.57	3.9	5.35	4.49	4.46	4.55
ENSG00000160602.14	AC010761.1	-2.26773	-1.18125	5.63e-05	0.000405098	-4.24913	-1.42001	-0.505899	0.00299592	0.0115253	-2.52347	0.9	1.21	1.01	1.35	0.97	0.51	0.53	0.52	0.69	0.79	0.66	0.72
ENSG00000253854.1	AC010834.3	1.29946	0.377911	0.0709215	0.124652	1.14922	1.44151	0.527578	0.0146623	0.0400968	1.8338	0.71	0.67	1.01	1.07	1.31	0.88	1.13	0.98	1.14	1.16	0.84	1.12
ENSG00000269973.1	AC010969.2	-1.39092	-0.476043	0.00210314	0.00704281	-2.67713	-2.33232	-1.22177	1.94e-05	0.000254672	-4.71156	0.57	0.72	0.72	0.7	0.52	0.5	0.43	0.44	0.26	0.2	0.24	0.31
ENSG00000279814.1	AC010997.6	-1.23341	-0.302654	0.216016	0.307123	-0.665514	-1.1413	-0.190679	0.365728	0.487679	-0.436841	0.86	1.04	1.72	1.58	1.07	1.45	0.78	0.75	1.02	0.9	0.77	1.2
ENSG00000230626.4	AC011005.1	1.20114	0.264401	0.244376	0.338844	0.611942	1.1512	0.20314	0.471314	0.586375	0.326689	0.77	0.86	1.04	1.7	1.09	1.21	1.44	1.06	0.74	1.67	0.9	1.07
ENSG00000249839.1	AC011330.1	-1.38081	-0.465511	0.0781422	0.134854	-1.10711	-1.34816	-0.430992	0.0191283	0.0495225	-1.71832	0.69	0.61	0.7	0.95	0.72	0.51	0.62	0.28	0.6	0.44	0.43	0.44
ENSG00000275601.1	AC011330.2	-1.69877	-0.764495	0.0254015	0.0537685	-1.59514	1.08886	0.122822	0.627088	0.722038	0.202672	0.78	0.89	1.43	1.69	0.79	0.94	0.54	0.37	1.05	1.15	0.74	1.29
ENSG00000254363.6	AC011379.2	-1.41811	-0.503965	0.108099	0.17555	-0.966178	-1.45538	-0.541391	0.113594	0.201978	-0.944646	0.06	0.08	0.11	0.14	0.17	0.07	0.1	0.04	0.08	0.15	0.05	0.04
ENSG00000224864.4	AC011447.1	1.10697	0.146621	0.407827	0.510327	0.389524	1.37414	0.458524	0.0442232	0.0958419	1.35435	2.76	4.38	3.63	3.89	4.02	3.73	4.21	3.5	4.11	5.66	3.46	4.85
ENSG00000258674.5	AC011448.1	1.34108	0.423398	0.341629	0.443713	0.466445	1.54305	0.625784	0.118885	0.209339	0.924873	0.24	0.27	0.58	0.53	0.68	0.2	0.57	0.69	0.27	0.87	0.41	0.57
ENSG00000105329.9	AC011462.1	-1.35774	-0.441208	0.0748011	0.129975	-1.12609	-1.12539	-0.170419	0.432256	0.550633	-0.364258	15.32	17.23	26.4	48.24	20.45	20.24	13.7	13	18.99	16.61	18.01	19.23
ENSG00000286177.1	AC011462.6	-1.19843	-0.26114	0.3026	0.402646	-0.519131	1.02584	0.0368043	0.861087	0.90673	0.0649529	0.36	0.29	0.51	0.68	0.38	0.44	0.25	0.36	0.44	0.38	0.36	0.4
ENSG00000269741.5	AC011473.4	-1.23137	-0.300261	0.262306	0.358805	-0.581192	1.03853	0.0545458	0.78512	0.849273	0.105064	0.69	0.52	0.49	0.62	0.49	0.45	0.3	0.61	0.5	0.58	0.47	0.51
ENSG00000267419.2	AC011477.1	1.19832	0.261009	0.347223	0.449895	0.459391	1.71271	0.776282	0.0178214	0.0468211	1.74906	1.39	1.57	1.17	0.84	1.55	1.45	1.41	1.08	1.8	1.28	1.84	1.93
ENSG00000269653.1	AC011479.3	1.36181	0.445527	0.10445	0.170841	0.981091	1.50101	0.585932	0.0112077	0.0325288	1.95048	0.58	0.69	0.95	1.14	1.66	1.28	0.8	0.77	1.26	1.23	0.85	1.02
ENSG00000130204.13	AC011481.1	1.07853	0.109068	0.0925412	0.154707	1.03366	1.24218	0.312879	0.000384238	0.00233109	3.4154	79.82	79.57	70.97	71.6	80.45	79.52	82.62	79.28	87.68	95.65	91.06	91.86
ENSG00000243829.1	AC011495.1	1.09133	0.126088	0.560547	0.654679	0.251388	-1.01513	-0.0216675	0.912579	0.943555	-0.0397296	1.42	1.53	1.22	1.45	1.64	1.85	1.41	1.03	1.25	1.09	1.02	1.32
ENSG00000269374.1	AC011497.2	1.26133	0.334943	0.101776	0.167322	0.992356	1.01807	0.0258345	0.873555	0.916059	0.0587097	2.77	3.41	3.02	3.12	3.23	3.58	5.03	3.54	2.55	2.44	2.65	3.62
ENSG00000280239.1	AC011498.7	1.2441	0.315097	0.111716	0.180446	0.951884	-1.01153	-0.0165426	0.934977	0.959086	-0.0291989	0.67	0.72	0.95	1.27	1.23	1.3	0.91	0.83	0.94	0.61	0.62	0.9
ENSG00000167807.15	AC011511.1	1.05631	0.0790357	0.74111	0.806403	0.130117	1.6711	0.740801	0.00569771	0.0191787	2.2443	0.29	0.37	0.25	0.39	0.41	0.41	0.23	0.27	0.46	0.62	0.43	0.38
ENSG00000267303.1	AC011511.4	1.14118	0.190523	0.0884844	0.14911	1.05313	-1.03221	-0.0457429	0.639723	0.732736	-0.194008	5.79	5.13	6.1	7.57	6.33	6.58	7.05	6.06	5.68	5.22	5.57	5.29
ENSG00000267607.1	AC011511.5	-1.02616	-0.0372555	0.909593	0.935359	-0.0411529	1.04504	0.0635538	0.873384	0.916003	0.0587946	0.12	0.14	0.13	0.38	0.18	0.2	0.13	0.13	0.15	0.07	0.18	0.2
ENSG00000065989.16	AC011529.1	1.9694	0.977754	0.00192223	0.00653841	2.71619	1.36555	0.449484	0.0319208	0.0742188	1.49593	0.15	0.11	0.19	0.16	0.42	0.33	0.17	0.24	0.22	0.21	0.15	0.17
ENSG00000280035.1	AC011676.5	-1.10837	-0.14844	0.617251	0.706084	-0.209538	-1.03452	-0.048958	0.811337	0.869806	-0.0907989	0.38	0.35	0.69	0.61	0.63	0.55	0.24	0.4	0.36	0.51	0.39	0.39
ENSG00000268573.1	AC011815.1	-1.14773	-0.198782	0.0569787	0.104066	-1.24429	1.15904	0.212935	0.0182357	0.0477448	1.73908	1.2	1.17	1.23	1.24	1.14	1.12	0.96	0.85	1.24	1.34	1.31	1.2
ENSG00000228007.1	AC011933.1	-1.14653	-0.197279	0.171974	0.255221	-0.764537	-1.00174	-0.00250711	0.984593	0.990276	-0.00674346	20.6	25.18	29	29.49	23.85	24.24	21.73	18.28	23.81	26.11	20.65	24.29
ENSG00000264853.1	AC011933.2	-1.10033	-0.137937	0.578035	0.670413	-0.238046	-1.29113	-0.36863	0.126933	0.220498	-0.896427	0.7	0.82	1.36	1.65	1.27	1.04	0.7	0.82	0.76	0.7	0.62	0.8
ENSG00000259924.1	AC011939.1	-1.01473	-0.0210961	0.894672	0.923416	-0.0483361	-1.12896	-0.175	0.24612	0.363531	-0.608853	3.47	3.65	5.13	4.86	4.58	4.96	3.66	3.05	4.18	3.2	2.87	3.11
ENSG00000261542.1	AC011978.2	1.40226	0.487759	0.0733155	0.127984	1.1348	1.1519	0.204021	0.318005	0.440459	0.497566	0.68	0.78	1.2	1.32	1.92	1.55	0.87	1.16	1.06	0.96	0.73	1.18
ENSG00000279277.2	AC012020.1	-1.20672	-0.271093	0.159867	0.24058	-0.796242	1.07359	0.10244	0.587291	0.689166	0.231147	0.32	0.32	0.51	0.52	0.41	0.29	0.29	0.29	0.39	0.38	0.31	0.42
ENSG00000213197.3	AC012066.1	-1.46111	-0.54707	0.00694504	0.0185925	-2.15833	1.25378	0.32628	0.147923	0.247223	0.829963	1.53	1.67	2.18	2.28	1.41	1.19	1.34	1.02	2.5	2.62	1.4	2.02
ENSG00000271936.1	AC012073.1	-1.12149	-0.165411	0.0711741	0.124942	-1.14768	1.07381	0.102744	0.260641	0.37958	0.583957	5.94	6.05	7.58	7.7	5.75	6.05	5.59	5.49	7.15	6.56	6.28	6.24
ENSG00000186076.5	AC012085.1	-1.45202	-0.538057	0.0324218	0.0657492	-1.48916	1.12898	0.175017	0.366438	0.488339	0.436	2.21	3.37	2.3	2.67	1.84	1.25	2.03	1.79	2.64	2.28	3.17	2.44
ENSG00000234327.7	AC012146.1	1.30509	0.384147	0.116803	0.186984	0.932546	-1.23735	-0.307256	0.154601	0.255543	-0.810788	3.22	2.87	1.96	2.15	3.26	3.55	4.76	3.93	1.32	1.82	2.26	2.55
ENSG00000261114.1	AC012181.1	-1.67556	-0.744639	0.00784541	0.0205575	-2.10538	-1.0056	-0.00805859	0.968784	0.980246	-0.0137732	0.99	0.93	1.14	0.96	0.39	0.57	0.53	0.68	0.85	1	0.59	1
ENSG00000261777.5	AC012184.3	-2.38126	-1.25172	0.00034382	0.00164067	-3.46367	-1.02602	-0.0370534	0.825892	0.880544	-0.0830765	0.71	0.48	0.75	1.14	0.38	0.26	0.33	0.28	0.58	0.66	0.75	0.7
ENSG00000280376.1	AC012186.3	-1.56788	-0.648815	0.0274395	0.0572588	-1.56162	1.0091	0.0130726	0.956104	0.972215	0.0194946	2.26	1.59	3.08	2.6	1.58	1	1.47	1.65	1.66	2.17	2.55	1.76
ENSG00000253477.5	AC012213.1	-1.28416	-0.36083	0.131142	0.205529	-0.882259	-1.2143	-0.280121	0.280882	0.401583	-0.551476	0.75	1.09	0.82	1.14	0.61	0.73	0.77	0.61	0.41	0.66	0.81	0.64
ENSG00000285667.1	AC012291.2	1.0322	0.0457206	0.839764	0.882382	0.0758427	-1.10807	-0.14805	0.571502	0.675846	-0.242982	0.3	0.57	0.56	0.55	0.55	0.51	0.35	0.52	0.25	0.34	0.43	0.48
ENSG00000272667.1	AC012306.2	-1.47531	-0.561018	0.0204755	0.0451045	-1.68877	1.29327	0.371024	0.0391474	0.0872172	1.4073	2.22	2.19	2.55	2.01	2.03	1.77	1.06	1.13	2.39	2.35	3.04	2.51
ENSG00000232098.3	AC012313.1	1.13978	0.188755	0.0622496	0.111975	1.20586	-1.42879	-0.514789	0.0015498	0.0068769	-2.80973	3.09	2.91	2.67	3.32	2.92	3.85	2.94	3.07	1.68	2.67	1.47	1.98
ENSG00000268543.1	AC012313.4	1.24304	0.313878	0.231288	0.324336	0.635847	-1.09127	-0.126005	0.663059	0.752138	-0.178448	1.05	1.46	2.71	1.84	2.58	1.75	2.05	1.77	0.89	1.4	1.07	1.7
ENSG00000269473.1	AC012313.8	1.12632	0.171611	0.183011	0.268303	0.737522	-1.73833	-0.7977	2.29e-05	0.000286069	-4.6409	1.01	0.81	1.02	1.12	1.12	0.92	0.97	1.22	0.46	0.5	0.54	0.51
ENSG00000260772.1	AC012321.1	-1.55694	-0.638717	0.00228794	0.00752775	-2.64056	-1.0854	-0.11823	0.274764	0.39513	-0.56104	7.85	9.27	11.24	10.97	7.31	7.12	4.61	5.15	8.81	8.17	7.72	8.75
ENSG00000231848.1	AC012354.2	1.47316	0.558918	0.0179409	0.0404738	1.74616	-1.05398	-0.0758444	0.780865	0.846043	-0.107424	1.58	2.91	2.61	2.7	3.96	3.16	3.64	3.19	1.59	2.76	2.39	1.43
ENSG00000272994.1	AC012360.3	-1.18751	-0.247945	0.15733	0.237469	-0.803188	1.12458	0.169381	0.27689	0.397382	0.557692	0.68	0.94	0.84	0.79	0.67	0.7	0.51	0.77	0.68	1	0.78	0.8
ENSG00000246863.2	AC012377.1	1.12167	0.165644	0.632793	0.719289	0.198738	1.29423	0.372098	0.231472	0.347477	0.635502	0.17	0.24	0.12	0.18	0.12	0.12	0.19	0.24	0.13	0.17	0.22	0.14
ENSG00000271976.1	AC012467.2	-1.09365	-0.129151	0.290325	0.388998	-0.537115	-1.31652	-0.396726	0.0398308	0.088346	-1.39978	0.77	0.72	0.99	0.93	0.87	0.79	0.65	0.71	0.51	0.43	0.7	0.63
ENSG00000273466.1	AC012510.1	-1.87269	-0.905116	0.00845239	0.0218266	-2.07302	1.47214	0.557912	0.0319808	0.0743368	1.49511	1.36	1.99	2.7	3.53	1.56	1.16	0.81	1.19	3.08	2.33	3.02	3.26
ENSG00000279348.1	AC012513.3	-1.39686	-0.48219	0.00343418	0.0104379	-2.46418	1.00144	0.0020789	0.981964	0.988641	0.00790426	3.66	3.37	4.41	4.33	3.51	2.53	2.33	2.42	3.91	3.45	3.26	3.64
ENSG00000260597.1	AC012531.1	-1.0967	-0.133171	0.710578	0.782598	-0.148388	-1.1518	-0.203891	0.503407	0.616009	-0.29808	0.3	0.34	0.59	0.94	0.69	0.54	0.35	0.25	0.36	0.33	0.3	0.47
ENSG00000261526.2	AC012615.1	-1.03052	-0.0433773	0.862766	0.899429	-0.0641072	1.08343	0.115611	0.542783	0.65147	0.265374	0.7	0.83	0.56	0.78	0.54	0.84	0.52	0.81	0.64	0.69	0.66	0.68
ENSG00000234773.7	AC012618.3	2.90154	1.53682	7.22e-05	0.000485185	4.14135	1.82752	0.869885	0.00258952	0.010304	2.58678	0.23	0.38	0.27	0.37	0.91	0.65	0.84	0.57	0.25	0.48	0.47	0.37
ENSG00000259802.1	AC012640.2	-1.27976	-0.355869	0.0910398	0.152638	-1.04077	-1.1595	-0.213509	0.254505	0.373022	-0.594304	1.72	2.19	1.93	1.55	1.46	1.77	1.33	1.11	1.62	1.33	1.28	1.4
ENSG00000258461.5	AC012651.1	1.02315	0.0330221	0.808985	0.859054	0.0920594	1.8318	0.873258	1.83e-05	0.000241354	4.73846	0.5	0.72	0.71	0.69	0.61	0.74	0.59	0.65	1.12	1.07	1.03	1.04
ENSG00000262712.1	AC012676.1	1.80946	0.855558	0.000769758	0.00311579	3.11365	1.53391	0.617212	0.0129605	0.036574	1.88738	0.27	0.26	0.28	0.39	0.56	0.45	0.52	0.52	0.33	0.48	0.42	0.33
ENSG00000277170.1	AC012676.3	-1.09736	-0.134043	0.57826	0.670577	-0.237877	-1.07287	-0.101481	0.554467	0.661555	-0.256124	2.22	2.71	2.26	2.75	3.62	1.74	2.08	1.78	2.08	2.31	1.82	1.89
ENSG00000280063.1	AC012676.5	-1.11804	-0.160972	0.765263	0.82622	-0.116189	-1.26526	-0.339433	0.496907	0.610146	-0.303725	0.69	0.54	2.02	3.06	1.94	1.42	0.67	0.66	1.04	0.71	0.63	1.07
ENSG00000279765.3	AC013394.1	-1.45416	-0.540187	0.000400761	0.00185498	-3.39711	1.13044	0.17689	0.0663594	0.131992	1.1781	2.9	2.77	3.57	2.75	2.25	1.97	1.64	2.27	3.27	3.04	3.05	3.45
ENSG00000259345.6	AC013652.1	1.00244	0.00351103	0.988113	0.991793	0.00519343	-1.14687	-0.197701	0.438376	0.556125	-0.358153	0.47	0.61	0.38	0.41	0.48	0.44	0.34	0.49	0.46	0.29	0.26	0.49
ENSG00000285542.1	AC013717.1	1.30729	0.386577	0.176684	0.260703	0.752802	1.75079	0.808005	0.00371073	0.0136575	2.43054	0.14	0.14	0.23	0.14	0.34	0.15	0.18	0.19	0.24	0.3	0.19	0.25
ENSG00000259583.2	AC015712.2	-1.42606	-0.51203	0.00138583	0.00501405	-2.85829	1.14071	0.189929	0.192073	0.300698	0.716533	0.93	1.16	0.89	1.06	0.67	0.73	0.63	0.65	0.96	0.82	1.01	1.07
ENSG00000272808.4	AC015712.6	-2.42313	-1.27687	0.00464641	0.0132821	-2.33288	-1.06804	-0.0949686	0.70277	0.783729	-0.153187	0.14	0.21	0.16	0.11	0.06	0.03	0.06	0.09	0.11	0.14	0.14	0.12
ENSG00000279432.1	AC015799.1	-1.01234	-0.0176879	0.887856	0.918607	-0.0516573	-1.08218	-0.113945	0.405488	0.526541	-0.392022	2.01	2.02	2.31	3.21	2.32	2.26	1.92	2.22	2.07	2.14	1.71	1.91
ENSG00000284526.1	AC015802.6	-1.29891	-0.377303	0.194974	0.282479	-0.710024	-1.08025	-0.111367	0.667435	0.755551	-0.175591	0.19	0.14	0.34	0.35	0.17	0.23	0.15	0.14	0.21	0.19	0.15	0.21
ENSG00000264112.1	AC015813.1	-1.11061	-0.151358	0.268771	0.365717	-0.570618	-1.16526	-0.220646	0.113567	0.201953	-0.944747	1.78	2.04	2.78	2.82	2.27	2.08	1.71	1.96	1.87	1.64	1.79	1.9
ENSG00000266086.2	AC015813.2	-1.23065	-0.299416	0.0426315	0.0822701	-1.37027	1.08925	0.12333	0.2893	0.410295	0.538652	6.41	5.91	5.23	4.94	3.84	3.95	4.66	4.69	6.04	5.57	5.06	6.05
ENSG00000279069.1	AC015813.5	-1.33995	-0.422183	0.205643	0.295617	-0.686886	-1.11888	-0.162052	0.535111	0.644514	-0.271556	0.76	0.76	0.82	0.45	0.43	0.39	0.46	0.74	0.56	0.62	0.46	0.49
ENSG00000279207.1	AC015813.6	1.06913	0.0964366	0.47484	0.574728	0.323453	1.0036	0.00518232	0.961378	0.975469	0.0171057	1.04	1.01	1.45	1.47	1.29	1.43	1	1.23	1.11	1.1	1.12	1.07
ENSG00000270977.1	AC015849.5	-2.34004	-1.22653	0.000450348	0.00203505	-3.34645	-2.24001	-1.1635	0.000999877	0.00485429	-3.00005	0.29	0.27	0.93	1.11	0.3	0.16	0.14	0.3	0.19	0.39	0.12	0.29
ENSG00000278600.1	AC015871.3	1.50599	0.590708	0.00447525	0.0128775	2.34918	1.13051	0.176969	0.269089	0.388698	0.570104	1.67	1.41	2.51	2.37	3.01	3.26	2.41	2.53	1.98	2.12	1.74	2.07
ENSG00000279394.1	AC015871.4	-1.00411	-0.00592066	0.987245	0.991409	-0.00557497	1.00732	0.0105151	0.971132	0.981814	0.0127218	0.19	0.24	0.57	0.45	0.62	0.35	0.23	0.2	0.27	0.32	0.23	0.33
ENSG00000279281.1	AC015883.1	-1.00573	-0.00824022	0.977833	0.985135	-0.00973521	-1.02538	-0.0361587	0.88902	0.926686	-0.0510883	0.61	0.77	1.13	1.82	1.2	1.23	0.63	0.88	0.92	0.87	0.69	0.94
ENSG00000279792.1	AC015909.5	-1.08847	-0.122298	0.469531	0.569581	-0.328335	-1.03266	-0.0463599	0.788495	0.851923	-0.103201	0.68	0.49	0.6	0.78	0.61	0.61	0.55	0.46	0.45	0.54	0.6	0.54
ENSG00000242660.1	AC015911.1	1.35947	0.443043	0.263604	0.360018	0.579048	1.28618	0.363094	0.364025	0.485771	0.438869	87.84	95.43	70.32	20.35	83.24	90.11	77.87	78.81	69.6	69.81	80.06	73.63
ENSG00000272606.1	AC015982.1	-1.2385	-0.308597	0.116828	0.187006	-0.932451	-1.08632	-0.119454	0.446522	0.563643	-0.350157	4.08	3.6	4.33	3.41	2.53	3.33	2.8	3.44	2.87	3.4	3.28	3.02
ENSG00000093100.13	AC016026.1	-1.31158	-0.391304	0.217828	0.308994	-0.661886	-1.29358	-0.371368	0.173192	0.278445	-0.761472	5.57	5.06	10.2	12.14	7.53	7.01	4.42	4.45	6.28	5.42	5.18	5.82
ENSG00000225335.3	AC016027.1	-1.55893	-0.640557	0.0306548	0.0627873	-1.5135	-1.13713	-0.185399	0.410983	0.531579	-0.386176	2.08	1.73	2.07	1.25	0.89	0.76	1.09	1.38	1.59	1.09	1.23	1.31
ENSG00000234913.1	AC016027.2	-1.97365	-0.980867	0.000999947	0.00383743	-3.00002	-1.40748	-0.493117	0.0276587	0.0662549	-1.55817	1.88	2.13	2.82	3.91	1.53	1.44	1.04	1.05	1.86	1.64	1.39	1.75
ENSG00000235445.1	AC016027.3	-1.6912	-0.75805	0.0495367	0.0930775	-1.30507	-1.56514	-0.646293	0.0263933	0.0638549	-1.57851	3.25	5.68	3.53	4.95	1.48	4.4	1.8	2.96	2.51	2.44	2.74	1.75
ENSG00000246089.3	AC016065.1	-1.27882	-0.354816	0.105022	0.171638	-0.978718	-1.39707	-0.482406	0.0252077	0.0616867	-1.59847	1.12	0.84	0.97	0.81	0.65	0.57	0.67	0.78	0.61	0.4	0.5	0.56
ENSG00000267374.1	AC016205.1	1.37056	0.454767	0.00140198	0.00505895	2.85326	1.34469	0.427271	0.0119303	0.0342838	1.92335	0.9	0.94	1.03	0.93	1.4	1.32	1.13	1.25	1.21	1.29	1.19	0.9
ENSG00000270964.1	AC016355.1	-1.44328	-0.529349	0.101163	0.166609	-0.994976	-1.06195	-0.0867185	0.796653	0.858438	-0.0987308	0.4	0.47	0.5	0.28	0.33	0.18	0.29	0.26	0.43	0.36	0.36	0.18
ENSG00000227540.1	AC016394.1	1.00531	0.00764583	0.975462	0.983725	0.0107898	1.53334	0.616674	0.00352715	0.0131267	2.45258	1.28	1.91	1.4	1.67	1.06	1.54	1.84	1.68	2.16	2.17	2.26	2.41
ENSG00000272599.2	AC016394.2	1.12361	0.168138	0.165578	0.247336	0.780997	1.26545	0.33965	0.0399971	0.0886533	1.39797	4.52	4.29	6.15	5.82	5.62	5.2	5.6	5.03	6.89	6.51	4.86	5.22
ENSG00000253372.5	AC016405.1	-1.08216	-0.113914	0.769775	0.829624	-0.113636	1.33534	0.417212	0.302626	0.424936	0.519093	0.51	0.8	1.61	1.52	1.21	1.06	0.51	0.86	1.46	1.49	0.73	0.95
ENSG00000280078.1	AC016526.3	2.3084	1.20689	0.00485293	0.0137873	2.314	1.18555	0.245552	0.553154	0.6603	0.257154	0.08	0.06	0.15	0.25	0.35	0.3	0.21	0.2	0.15	0.09	0.07	0.15
ENSG00000279502.1	AC016542.2	1.29734	0.375556	0.0896071	0.150782	1.04766	1.51263	0.597062	0.0318594	0.0741085	1.49676	1.31	1.84	2.08	2.74	2.74	3.13	1.97	2.02	2.93	2.95	1.64	2.98
ENSG00000280166.1	AC016542.3	1.24715	0.318635	0.296665	0.395985	0.527734	1.37783	0.462398	0.1408	0.238399	0.851397	0.87	0.8	1.75	1.47	1.99	1.74	0.84	1.39	1.28	1.69	0.88	1.82
ENSG00000267422.1	AC016582.2	-1.12994	-0.176244	0.538367	0.634542	-0.268922	1.55746	0.639197	0.0280993	0.0670892	1.55131	0.33	0.86	0.8	0.85	0.36	0.63	0.88	0.48	1.32	1.03	1.03	0.69
ENSG00000268670.1	AC016586.1	1.1495	0.201002	0.371836	0.474421	0.429648	1.15682	0.21016	0.452914	0.569284	0.343984	0.86	1.28	1	1.23	1.55	1.33	0.83	1.21	1.55	1.31	0.77	0.79
ENSG00000282393.1	AC016588.2	1.55779	0.639505	8.81e-05	0.000568915	4.05525	1.2326	0.301704	0.0438227	0.0951802	1.3583	0.64	0.75	0.9	0.87	1.22	1.24	1.1	1.13	1.04	0.83	0.73	0.82
ENSG00000286104.1	AC016629.3	-1.35122	-0.434259	0.0302125	0.0620697	-1.51981	-1.15607	-0.209224	0.2309	0.346816	-0.636576	1.2	1.29	1.36	1.19	1.45	0.8	1.09	1.08	0.91	0.82	0.74	0.72
ENSG00000235225.1	AC016712.1	-1.65115	-0.723474	0.00189273	0.00645841	-2.72291	-1.06192	-0.0866804	0.647982	0.739916	-0.188437	6.88	6.4	10	6.64	4.97	4.66	3.78	4.11	6.3	7.96	4.79	6.29
ENSG00000270820.5	AC016727.1	-1.66052	-0.731634	0.0164959	0.0378629	-1.78262	-1.54632	-0.62884	0.0135212	0.0377697	-1.86898	1.45	1.91	2.1	2.33	0.71	1.97	0.9	0.97	1.22	1.13	0.83	0.72
ENSG00000228305.2	AC016734.1	1.01601	0.0229134	0.932394	0.952213	0.0304006	-1.03013	-0.0428311	0.885819	0.924494	-0.0526548	2.47	2.25	1.66	1.3	1.97	2.16	1.39	2.06	1.25	1.79	1.2	2.42
ENSG00000223947.1	AC016738.1	1.1325	0.179517	0.546238	0.641624	0.262618	1.32946	0.41084	0.205079	0.31623	0.688079	0.15	0.15	0.09	0.1	0.12	0.15	0.12	0.13	0.13	0.13	0.15	0.11
ENSG00000218175.2	AC016739.1	-1.19084	-0.251984	0.113754	0.183189	-0.944035	-1.04935	-0.0695008	0.632897	0.727104	-0.198667	67.04	75.26	80.1	108.25	71.6	64.1	63.64	62.8	71.08	76.84	78.58	68.38
ENSG00000272563.1	AC016745.2	-1.38218	-0.466944	0.146371	0.223849	-0.834546	-1.00401	-0.00577766	0.983896	0.9899	-0.0070508	0.11	0.24	0.28	0.21	0.16	0.16	0.09	0.17	0.14	0.17	0.14	0.23
ENSG00000270195.2	AC016773.1	-1.1079	-0.147825	0.371752	0.474388	-0.429747	-1.23209	-0.301107	0.139854	0.237048	-0.854324	1.95	1.81	1.67	2.43	1.62	1.67	1.61	1.81	1.49	1.47	0.98	1.66
ENSG00000226380.9	AC016831.1	-1.60744	-0.684765	0.00734306	0.0194709	-2.13412	1.14026	0.189368	0.263824	0.382995	0.578686	5.04	5.28	7.7	8.11	4.88	4.52	3.18	3.19	7.94	7.36	5.61	7.33
ENSG00000271204.1	AC016831.5	-1.5085	-0.593117	0.0129218	0.030963	-1.88868	-1.07694	-0.106932	0.535437	0.64483	-0.271292	4.07	3.71	6.35	5.95	4.07	3.37	2.42	2.61	4.93	4.06	3.43	4.29
ENSG00000285106.1	AC016831.7	-1.5712	-0.651865	0.0247892	0.0526376	-1.60574	1.02134	0.0304691	0.881558	0.921249	0.0547492	1.96	2.36	3.32	4.25	2.38	1.95	1.37	1.42	2.84	2.69	2.23	2.95
ENSG00000233223.2	AC016876.1	1.06647	0.0928458	0.467015	0.566909	0.330669	1.05156	0.0725278	0.586556	0.688557	0.23169	5.07	5.59	6.45	4.85	4.46	5.53	7.64	5.41	4.47	5.68	7.26	5.69
ENSG00000264772.6	AC016876.2	1.25919	0.332491	0.0532444	0.0986248	1.27373	1.30005	0.378563	0.0289999	0.0688693	1.5376	1.05	1.05	0.95	0.75	1.05	1.2	1.08	1.25	1.08	1.02	1.08	1.27
ENSG00000253415.1	AC016877.2	1.22967	0.298277	0.336026	0.4386	0.473627	-1.13659	-0.184714	0.374369	0.496427	-0.4267	0.94	0.99	1.66	1.72	2.24	2.29	0.96	1.05	1	0.96	0.78	1.19
ENSG00000271930.1	AC016877.3	1.11635	0.158788	0.325465	0.427485	0.487496	1.16086	0.215194	0.152154	0.252464	0.817717	4.68	6.99	7.44	7.35	6.13	7.46	7.37	7.41	7.13	6.05	6.88	6.79
ENSG00000230732.4	AC016949.1	1.21134	0.27661	0.0881849	0.148714	1.05461	1.10911	0.149398	0.28822	0.409199	0.540275	2.91	3.05	4.37	4.54	5.29	4.28	3.58	3.84	4.2	3.49	3.4	3.51
ENSG00000224959.1	AC017002.1	1.21171	0.277044	0.170953	0.253959	0.767123	-1.05422	-0.0761696	0.693037	0.775906	-0.159244	4.65	5.91	8.29	8.02	9.19	9.27	6.09	6.39	6.64	5.54	4.12	6.5
ENSG00000259915.2	AC017071.1	-1.40956	-0.495244	0.172552	0.255818	-0.763081	1.11641	0.158871	0.52269	0.633343	0.281755	0.13	0.28	0.23	0.29	0.22	0.24	0.08	0.11	0.2	0.22	0.19	0.19
ENSG00000273064.1	AC017083.1	-1.12403	-0.168687	0.567412	0.660838	-0.246101	1.21567	0.281747	0.318178	0.440622	0.49733	1.48	1.04	1.44	0.7	0.83	1.1	0.89	1.06	1.01	1.3	1.31	1.16
ENSG00000273398.6	AC017083.3	-2.12336	-1.08635	0.267787	0.364563	-0.57221	1.25358	0.326049	0.299558	0.421516	0.523519	0.21	0.22	0.43	0.34	0.34	0.23	0.37	0	0.38	0.27	0.44	0.19
ENSG00000285596.1	AC017116.2	1.01591	0.0227786	0.910771	0.936172	0.0405906	-1.18522	-0.245154	0.22843	0.343809	-0.641247	0.91	1.03	1.44	1.96	1.42	1.52	0.98	1.12	0.95	1.08	0.79	0.99
ENSG00000235683.1	AC018442.1	1.25341	0.325855	0.240252	0.334185	0.619333	-1.08214	-0.113882	0.674159	0.760714	-0.171238	0.3	0.28	0.61	0.4	0.61	0.55	0.47	0.29	0.43	0.31	0.22	0.29
ENSG00000234520.5	AC018464.1	2.82051	1.49596	0.0040372	0.0118568	2.39392	3.69353	1.885	0.00141322	0.00637578	2.84979	0.66	0.44	0.72	0.22	1.08	1.34	1.2	1.42	1.29	1.19	1.19	1.26
ENSG00000264920.1	AC018521.5	-1.72481	-0.786439	0.00331213	0.010124	-2.47989	-1.02642	-0.0376249	0.777195	0.843095	-0.10947	4.41	4.18	3.79	2.85	1.37	2.41	2.44	2.24	3.45	3.38	3.49	4.38
ENSG00000279433.1	AC018529.3	-1.0249	-0.0354821	0.941364	0.958773	-0.0262425	-1.09716	-0.133773	0.759791	0.828543	-0.119306	0.19	0.15	0.56	0.51	0.48	0.5	0.18	0.14	0.32	0.13	0.18	0.33
ENSG00000277559.1	AC018553.1	-1.50479	-0.589566	0.0238053	0.0509898	-1.62333	-1.01123	-0.0161073	0.94305	0.96372	-0.0254653	0.4	0.29	0.53	0.49	0.35	0.24	0.21	0.26	0.26	0.41	0.32	0.41
ENSG00000283689.1	AC018553.2	-1.97945	-0.985103	0.00109954	0.00414187	-2.95879	1.00738	0.0106133	0.966	0.978582	0.0150228	0.58	0.57	0.5	0.71	0.27	0.27	0.22	0.28	0.44	0.71	0.49	0.36
ENSG00000279133.1	AC018628.1	1.04587	0.0647077	0.499431	0.597598	0.301524	1.06198	0.0867563	0.356071	0.477901	0.448464	2.69	2.78	2.39	3.33	2.8	2.85	2.56	2.72	2.78	2.64	2.66	2.79
ENSG00000275778.2	AC018630.2	1.29796	0.376243	0.0519481	0.0966772	1.28443	-1.53347	-0.616801	0.0132019	0.0370849	-1.87936	2.44	3.2	2.93	2.56	2.55	3.8	3.69	3.11	1.25	1.39	1.97	1.71
ENSG00000230715.3	AC018638.2	-1.58818	-0.667372	0.00700596	0.0187431	-2.15453	1.06818	0.0951506	0.614609	0.712375	0.211401	4.58	5.5	5.29	5.37	4.1	3.48	3.29	2.02	3.75	4.29	6.24	5.77
ENSG00000243302.3	AC018638.4	-1.53452	-0.617785	0.00042634	0.00195217	-3.37024	1.08337	0.115519	0.101369	0.184082	0.994094	8.32	8.57	9.65	8.68	6.62	5.97	4.25	5.22	8.99	8.66	8.6	9
ENSG00000243679.1	AC018638.5	-1.7748	-0.827654	0.0046008	0.013175	-2.33717	1.15305	0.205459	0.284984	0.405974	0.545179	2.46	3.45	4.22	4.91	2.09	1.75	2.64	1.49	3.16	4.5	3.98	3.42
ENSG00000271553.1	AC018638.7	-1.05368	-0.0754318	0.823199	0.870285	-0.0844951	1.24328	0.314155	0.356616	0.47844	0.447799	0.32	0.66	0.98	1.1	0.74	0.78	0.42	0.62	1.01	0.67	0.63	0.65
ENSG00000229677.1	AC018644.1	-2.2816	-1.19005	0.00292899	0.00916215	-2.53328	-1.04883	-0.0687758	0.823477	0.878698	-0.0843484	1.48	0.94	1.59	1.16	0.32	0.74	0.4	0.6	1.67	1.04	0.7	0.79
ENSG00000273014.1	AC018645.2	-1.208	-0.272626	0.407717	0.510245	-0.389641	1.10682	0.146423	0.662859	0.751964	0.178579	1.71	0.74	1.81	1.88	1.34	1.36	0.77	1.05	1.55	0.95	1.24	1.38
ENSG00000271122.1	AC018647.2	1.25318	0.325598	0.00235812	0.00771009	2.62743	-1.06309	-0.0882628	0.35379	0.476158	-0.451254	1.53	1.67	1.85	1.96	2.25	2.11	1.79	2.08	1.42	1.47	1.3	1.71
ENSG00000273306.1	AC018690.1	1.11774	0.160579	0.350313	0.452993	0.455543	1.09088	0.125492	0.471731	0.586711	0.326305	2.02	1.99	2.78	2.35	3.24	2.39	1.94	2.36	2.45	1.79	1.91	2.63
ENSG00000275393.1	AC018695.6	1.04252	0.0600816	0.749831	0.813544	0.125037	-1.22248	-0.289809	0.206462	0.317659	-0.685159	1.55	1.45	2.25	2.34	1.95	2.33	1.75	1.57	1.43	1.33	0.88	1.59
ENSG00000237039.1	AC018738.1	1.61108	0.688031	0.0461223	0.0877002	1.33609	1.17336	0.230643	0.355745	0.477632	0.448861	11.96	15.27	14.32	7.94	16.36	14.27	20.25	32.74	12.6	14.49	14.5	10.77
ENSG00000269982.1	AC018809.2	1.03887	0.0550096	0.834762	0.878563	0.0784372	-1.25584	-0.328654	0.219768	0.333826	-0.658036	0.47	0.56	1.03	1.22	0.97	0.91	0.63	0.59	0.61	0.58	0.47	0.48
ENSG00000231409.3	AC018868.1	1.04212	0.0595282	0.683069	0.760683	0.165535	1.05585	0.0784089	0.568138	0.673012	0.245546	67.5	99.07	93.9	86.86	90.44	94.49	87.99	72.72	80.09	95.48	80.32	92.1
ENSG00000279791.1	AC018892.3	-2.0421	-1.03006	0.00612393	0.0167431	-2.21297	-1.33312	-0.414805	0.101985	0.184873	-0.991463	0.29	0.33	0.45	0.27	0.08	0.21	0.17	0.15	0.14	0.26	0.21	0.24
ENSG00000233611.3	AC019068.1	-1.93132	-0.949587	0.0652178	0.116485	-1.18563	1.01964	0.028057	0.93109	0.956148	0.0310081	0.69	1.25	1.94	2.65	1.45	0.81	0.36	0.76	1.34	1.7	1.04	1.4
ENSG00000272711.1	AC019069.1	-1.87743	-0.90876	3.86e-05	0.000303738	-4.41354	-1.0703	-0.0980093	0.497215	0.610342	-0.303456	2.47	2.2	2.26	2.41	1.23	1.26	1.29	1	2.31	1.9	1.51	2.11
ENSG00000231822.1	AC019097.1	-1.18288	-0.242301	0.131079	0.20551	-0.882467	1.118	0.160921	0.279408	0.400062	0.553762	1.74	2.07	2.31	1.91	1.95	1.53	1.44	1.63	1.99	2.13	1.99	1.75
ENSG00000283321.1	AC019117.3	2.21378	1.14651	0.0492199	0.0926112	1.30786	2.83604	1.50388	0.0393249	0.0875273	1.40533	0.72	0.26	0.16	0.64	0.92	1.52	0.44	0.75	0.45	1.55	1.89	0.61
ENSG00000272777.1	AC019131.2	1.01319	0.0189081	0.943225	0.960065	0.0253846	1.76707	0.821363	0.00407051	0.0147027	2.39035	0.47	0.47	0.98	0.72	0.61	0.62	0.78	0.44	1.01	0.84	0.93	0.96
ENSG00000269210.2	AC019171.1	1.11565	0.157878	0.580988	0.673066	0.235833	-1.04615	-0.0650949	0.824619	0.879389	-0.0837465	1.6	1.71	0.78	1.64	1.58	1.28	1.62	1.41	1.2	1.41	1.08	0.97
ENSG00000229852.2	AC019205.1	1.0426	0.0601885	0.551677	0.646559	0.258315	1.11527	0.157395	0.0683282	0.135202	1.1654	2.78	2.83	3.39	3.12	3.76	3.11	3.1	2.97	3.19	3.28	3.19	3.34
ENSG00000281469.1	AC019226.1	-1.49139	-0.576659	0.12385	0.196355	-0.907106	-1.25523	-0.32795	0.286737	0.407743	-0.542517	0.99	2.01	1.32	1.92	0.54	1.28	1.41	0.67	1.01	0.66	1.31	0.88
ENSG00000283239.1	AC019257.8	1.53515	0.618379	0.70626	0.77925	0.151035	3.24614	1.69873	0.18165	0.288064	0.740764	0.06	0.21	0.08	0	0.14	0.22	0.18	0	0.1	0.07	0.14	0.48
ENSG00000257674.1	AC020629.1	-1.44665	-0.532716	0.0836132	0.142533	-1.07773	-1.44521	-0.531278	0.106769	0.192107	-0.971556	0.47	0.65	0.91	1.34	0.6	0.68	0.38	0.45	0.34	0.69	0.5	0.39
ENSG00000260648.3	AC020658.3	1.14965	0.20119	0.387858	0.490304	0.411327	-1.82033	-0.864203	0.00761291	0.0239751	-2.11845	0.13	0.14	0.22	0.17	0.28	0.19	0.14	0.14	0.09	0.06	0.1	0.05
ENSG00000279409.1	AC020658.6	-2.5649	-1.3589	9.58e-05	0.000606577	-4.0187	-1.60235	-0.680192	0.00673834	0.0218182	-2.17145	1.27	1.07	1.98	1.61	0.59	0.54	0.4	0.65	0.57	0.91	0.89	0.83
ENSG00000279537.1	AC020658.7	-1.66434	-0.734951	0.000493767	0.0021873	-3.30648	-1.31234	-0.392145	0.0104321	0.0306936	-1.98163	1.01	1.06	1.18	1.28	0.53	0.75	0.61	0.75	0.79	0.63	0.87	0.74
ENSG00000251161.3	AC020661.1	-2.21135	-1.14492	0.000957229	0.00370866	-3.01898	1.17398	0.231404	0.122149	0.213838	0.913109	0.65	0.84	0.89	0.8	0.32	0.22	0.43	0.41	0.81	0.92	0.73	0.81
ENSG00000280036.1	AC020661.4	1.09059	0.125104	0.645787	0.730214	0.189911	1.01491	0.0213449	0.93266	0.957503	0.0302764	0.34	0.35	0.65	0.77	0.78	0.58	0.39	0.41	0.53	0.46	0.34	0.41
ENSG00000275056.1	AC020663.3	1.04572	0.0644984	0.752329	0.815724	0.123592	1.06212	0.0869506	0.707394	0.786748	0.150339	1.39	1.06	1.98	1.88	2.12	1.63	1.21	1.38	1.43	1.11	1.97	1.28
ENSG00000224722.3	AC020688.1	-1.35026	-0.43324	0.225489	0.317745	-0.646875	-1.03989	-0.0564308	0.872889	0.9159	-0.059041	0.2	0.18	0.45	0.57	0.23	0.2	0.14	0.24	0.26	0.26	0.17	0.18
ENSG00000279122.1	AC020763.2	-1.28888	-0.366116	0.135248	0.210638	-0.86887	1.37528	0.45973	0.0380244	0.0851662	1.41994	0.67	1.09	1.13	1.02	0.98	0.54	0.59	0.81	1.19	1.5	1.05	0.98
ENSG00000213757.3	AC020898.1	-1.13958	-0.188498	0.463138	0.563572	-0.33429	-1.45472	-0.54074	0.0159817	0.0429328	-1.79638	1.45	2.1	1.43	1.98	0.98	1.59	1.51	1.81	0.92	1.11	1.04	1.01
ENSG00000273654.1	AC020904.2	-1.03146	-0.0446896	0.770294	0.829907	-0.113343	-1.06714	-0.0937488	0.5421	0.650748	-0.26592	0.91	0.94	1.06	1.46	1.12	0.98	0.88	0.68	0.8	0.93	0.72	1.01
ENSG00000279329.1	AC020910.5	1.08307	0.115126	0.426382	0.527875	0.370201	1.52618	0.609925	0.00418728	0.0150411	2.37807	0.83	0.74	0.91	0.97	0.82	0.94	0.82	1.04	1.4	1.15	0.88	1.28
ENSG00000267216.1	AC020915.1	1.07219	0.100564	0.435553	0.536522	0.360959	-1.22884	-0.297299	0.0647706	0.129395	-1.18862	1.55	1.87	1.75	2.35	2.3	1.84	1.59	1.85	1.48	1.53	1.04	1.46
ENSG00000268201.1	AC020915.2	1.45747	0.54347	0.0453011	0.0864737	1.34389	-1.16872	-0.22493	0.437244	0.555173	-0.359276	1.71	1.38	2.07	2.73	4.23	2.31	2.28	2.41	0.91	1.94	1.82	1.08
ENSG00000268516.2	AC020915.3	1.96651	0.975635	6.48e-05	0.000447405	4.18861	1.08928	0.123375	0.428438	0.547207	0.368112	0.66	0.79	0.79	0.61	1.55	1.29	1.17	1.44	0.75	0.67	0.72	0.61
ENSG00000283515.1	AC020915.5	1.89848	0.924847	0.0842704	0.143469	1.07433	-1.67618	-0.745176	0.350851	0.473686	-0.454877	0.61	0.38	1.73	0.95	1.52	2.04	0.87	0.83	0.55	0.64	0.66	0.08
ENSG00000267519.6	AC020916.1	1.42474	0.510697	2.23e-06	3.85e-05	5.65178	1.1645	0.219713	0.00113988	0.0053811	2.94314	3.97	3.9	4.01	4.37	6.01	5.68	5.53	5.42	4.46	4.82	4.58	4.43
ENSG00000240418.1	AC020917.1	1.32938	0.410751	0.195726	0.283326	0.708351	1.42818	0.514181	0.201884	0.312418	0.694898	1.14	1.09	1.33	0.65	1.61	1.58	1.48	0.81	0.66	1.85	1.78	1.11
ENSG00000280332.1	AC020917.4	1.13678	0.184959	0.383956	0.486245	0.415718	1.07759	0.107808	0.573156	0.677401	0.241727	0.34	0.41	0.59	0.71	0.61	0.67	0.41	0.48	0.5	0.45	0.42	0.43
ENSG00000259797.1	AC020978.1	-1.70661	-0.771132	0.0744565	0.129473	-1.1281	1.15209	0.204249	0.540962	0.649869	0.266833	2.92	2.73	2.25	1.46	1.45	1.36	2.02	0.57	2.62	2.57	2.73	1.41
ENSG00000262160.1	AC020978.5	-1.98155	-0.986629	5.52e-06	7.47e-05	-5.258	-1.03174	-0.0450741	0.592798	0.694202	-0.227093	3.52	3.58	4.09	4.55	2.01	2.21	1.74	1.55	3.7	3.14	3.45	3.74
ENSG00000262514.1	AC020978.6	-1.37701	-0.46154	0.0988228	0.163503	-1.00514	1.04189	0.0592007	0.785843	0.849719	0.104664	0.48	0.82	1.06	0.96	0.63	0.81	0.44	0.41	0.72	0.82	0.58	0.76
ENSG00000263276.1	AC020978.7	-1.84252	-0.881676	0.00132323	0.00482422	-2.87837	-1.17969	-0.238407	0.176564	0.282446	-0.753098	0.4	0.33	0.51	0.59	0.23	0.31	0.18	0.2	0.29	0.33	0.31	0.37
ENSG00000279649.1	AC020978.9	-1.06197	-0.0867374	0.770885	0.830156	-0.113011	1.108	0.147958	0.570089	0.674723	0.244057	0.17	0.22	0.27	0.15	0.29	0.22	0.12	0.14	0.18	0.25	0.15	0.18
ENSG00000230580.1	AC021016.1	-1.22989	-0.298526	0.0501217	0.0939804	-1.29997	-1.13123	-0.177889	0.294107	0.415748	-0.531494	6.34	9.23	7.98	8.92	6.24	6.55	6.9	6.06	5.58	5.91	6.03	8.35
ENSG00000261338.2	AC021016.2	-1.60089	-0.67887	0.00312166	0.00964091	-2.50561	1.21662	0.28288	0.0421117	0.092203	1.3756	0.5	0.53	0.57	0.67	0.36	0.47	0.29	0.26	0.61	0.63	0.57	0.59
ENSG00000177406.4	AC021054.1	-1.27242	-0.347579	0.010825	0.0267583	-1.96557	-1.7969	-0.845509	3.63e-05	0.000404174	-4.43958	1.56	1.39	1.4	1.51	1.13	1.18	1	1.12	0.75	0.83	0.77	0.71
ENSG00000240950.1	AC021074.1	-1.26617	-0.340477	0.0892569	0.150271	-1.04936	1.09295	0.128225	0.46776	0.583042	0.329977	3.31	3.02	3.4	4.01	2.53	2.36	3.54	2.08	4.26	2.81	3.7	2.77
ENSG00000230551.4	AC021078.1	1.02897	0.0412065	0.744575	0.80936	0.128091	-1.19369	-0.255431	0.0352071	0.0801014	-1.45337	3.65	3.82	4.88	5.24	4.91	4.82	3.78	4.1	3.46	3.56	3.25	3.66
ENSG00000260774.1	AC021087.3	-1.136	-0.183965	0.139696	0.216235	-0.854816	-1.24483	-0.315945	0.0198824	0.0511025	-1.70153	1.23	1.44	1.8	1.86	1.55	1.29	1.2	1.23	1.07	1.19	1.03	1.22
ENSG00000286001.1	AC021087.5	1.40472	0.490288	0.139657	0.216195	0.854937	-1.61143	-0.688346	0.0308919	0.0723208	-1.51016	0.4	0.2	0.37	0.34	0.57	0.59	0.42	0.24	0.13	0.24	0.15	0.16
ENSG00000272661.1	AC021097.1	-2.52101	-1.334	0.000832664	0.00332224	-3.07953	1.06499	0.0908343	0.726214	0.801959	0.138935	2.09	2.25	2.09	1.33	0.69	0.7	0.57	0.85	1.28	2.1	1.77	2.03
ENSG00000249863.2	AC021106.1	-1.5675	-0.648467	0.040607	0.0790624	-1.3914	-1.46148	-0.547428	0.0762367	0.147279	-1.11784	1.13	0.79	0.88	1.7	0.93	0.52	0.53	0.72	0.85	0.47	0.5	0.75
ENSG00000271966.1	AC021321.1	1.11757	0.16036	0.456255	0.55677	0.340793	1.43643	0.522486	0.0147917	0.0403599	1.82998	0.69	0.86	0.63	0.87	0.78	0.88	0.66	1	1.07	0.91	0.99	0.85
ENSG00000272800.2	AC021851.1	1.11591	0.158223	0.558212	0.652423	0.253201	1.18727	0.247648	0.280292	0.400995	0.55239	0.4	0.38	0.69	0.51	0.9	0.41	0.4	0.5	0.59	0.41	0.4	0.6
ENSG00000279347.1	AC021945.1	1.01039	0.0149081	0.91636	0.940167	0.037934	1.04362	0.0615964	0.608591	0.707259	0.215674	1.64	2.09	2.2	2.28	1.85	2.56	1.69	1.89	2.11	1.9	1.6	1.99
ENSG00000237807.3	AC022034.1	1.65425	0.726181	0.00729395	0.0193632	2.13704	-1.52966	-0.613211	0.0162754	0.0435754	-1.78847	0.65	0.46	0.81	0.78	0.81	1.02	1.17	1.22	0.43	0.27	0.45	0.37
ENSG00000245648.1	AC022075.1	1.75107	0.808238	0.00937184	0.0237804	2.02818	-1.03948	-0.0558614	0.787612	0.851104	-0.103688	0.65	0.48	0.45	0.4	0.75	0.67	1.05	0.91	0.44	0.39	0.42	0.41
ENSG00000273989.1	AC022079.1	-1.33621	-0.418148	0.218678	0.309847	-0.660195	-1.48765	-0.573035	0.113393	0.201688	-0.945414	0.65	1.34	1.68	1.97	0.86	1.37	0.76	0.79	0.66	0.52	0.61	1.01
ENSG00000267169.1	AC022098.1	1.13072	0.177235	0.433301	0.534415	0.36321	1.04576	0.0645498	0.710431	0.789134	0.148478	0.74	0.7	1.18	0.88	0.73	0.83	0.74	1.07	0.45	1.04	0.55	0.62
ENSG00000280187.1	AC022107.1	-1.02582	-0.0367717	0.860893	0.897853	-0.0650506	1.22338	0.290868	0.137548	0.234146	0.861547	0.4	0.45	0.37	0.7	0.37	0.45	0.43	0.48	0.45	0.5	0.53	0.51
ENSG00000286261.1	AC022137.3	1.48339	0.568897	0.0219388	0.0476804	1.65879	1.26314	0.337011	0.0818857	0.155765	1.08679	1.09	1.23	0.87	0.75	1.24	1.59	1.35	1.78	1.13	1.07	1.21	1.02
ENSG00000269378.1	AC022149.1	1.29831	0.37663	0.0546275	0.100623	1.26259	1.1973	0.259785	0.213411	0.325936	0.670783	4.1	5.52	4.61	3.4	5.28	5.34	6.05	5.5	4.2	4.31	6.05	4.4
ENSG00000269825.1	AC022150.4	1.81145	0.857143	0.000119331	0.000716385	3.92325	1.09456	0.130353	0.328177	0.450737	0.483892	5.83	5.98	7.93	8.97	13.52	13.75	10.52	11.43	8	7.37	6.44	7.22
ENSG00000260276.2	AC022167.2	-1.48629	-0.571712	0.0223294	0.0483349	-1.65112	1.51684	0.601071	0.0101864	0.0300833	1.99198	2.12	1.12	1.65	2.72	1.15	1.01	1.28	1.47	2.78	2.81	2.54	2.19
ENSG00000255397.1	AC022182.3	1.08774	0.121335	0.660423	0.74215	0.180178	1.36512	0.449025	0.0703001	0.138113	1.15304	0.19	0.16	0.28	0.24	0.29	0.31	0.12	0.19	0.24	0.18	0.24	0.3
ENSG00000213399.3	AC022210.1	-1.05563	-0.0781077	0.552252	0.646998	-0.257863	1.14228	0.191917	0.226724	0.342182	0.644503	4.68	6.44	7.49	6.16	5.71	5.36	5.72	5.39	5.15	7.42	5.98	6.89
ENSG00000263786.1	AC022211.1	1.20976	0.274722	0.119184	0.190144	0.923781	1.24573	0.316987	0.0783516	0.150438	1.10595	3.69	2.85	3.35	5.18	4.32	4.31	3.85	4.73	3.8	4.66	4.12	3.66
ENSG00000263843.1	AC022211.2	-1.38562	-0.470532	0.02358	0.0505941	-1.62746	-1.38384	-0.468682	0.0366371	0.0827893	-1.43608	0.81	0.6	0.77	0.87	0.5	0.43	0.56	0.6	0.49	0.51	0.48	0.68
ENSG00000279035.1	AC022211.4	1.40794	0.49359	0.0224479	0.0485707	1.64882	-1.0309	-0.043902	0.882333	0.921698	-0.0543677	0.2	0.27	0.3	0.24	0.4	0.37	0.27	0.34	0.25	0.26	0.1	0.24
ENSG00000280042.1	AC022336.3	-1.0527	-0.0740914	0.8481	0.888644	-0.0715527	-1.1652	-0.220581	0.423072	0.543221	-0.373586	0.28	0.25	0.32	0.66	0.44	0.53	0.14	0.27	0.24	0.27	0.19	0.28
ENSG00000247934.4	AC022364.1	1.15776	0.211335	0.251421	0.346919	0.599599	-1.36912	-0.45325	0.115282	0.204413	-0.938237	0.65	0.48	0.51	0.84	0.9	0.68	0.63	0.46	0.41	0.44	0.69	0.26
ENSG00000272410.5	AC022384.1	1.11801	0.16093	0.23653	0.330256	0.626115	1.08368	0.115935	0.452624	0.569098	0.344263	2.55	3.26	3.56	4.27	4.17	3.69	3.25	3.23	3.93	3.37	2.65	3.41
ENSG00000242288.9	AC022400.3	-4.43726	-2.14967	0.0507507	0.094907	-1.29456	-1.93636	-0.953347	0.272816	0.393051	-0.564131	0.14	0.13	0.13	0.22	0.21	0	0.14	0	0	0.09	0.07	0.31
ENSG00000271816.1	AC022400.5	-1.26762	-0.342126	0.021111	0.046184	-1.67549	1.12172	0.165717	0.339326	0.461672	0.469383	1.31	1.26	1.67	1.64	1.14	0.96	1.14	1.19	1.06	1.63	1.8	1.39
ENSG00000272140.2	AC022400.6	-1.16403	-0.219125	0.121448	0.193116	-0.915611	1.17246	0.229543	0.220188	0.334307	0.657206	2.24	2.33	2.25	2.63	2.29	2.36	1.61	1.73	2.27	2.05	1.5	3.26
ENSG00000272916.5	AC022400.7	-1.08819	-0.121927	0.624077	0.712071	-0.204762	1.01647	0.0235631	0.917928	0.947126	0.0371914	0.17	0.31	0.25	0.3	0.2	0.35	0.18	0.2	0.25	0.24	0.3	0.18
ENSG00000279088.1	AC022400.8	-1.13818	-0.186725	0.203077	0.292242	-0.69234	1.30088	0.379484	0.0116891	0.0337117	1.93222	3.23	2.91	2.94	2.48	2.57	2.73	2.17	2.36	3.34	3.37	3.29	3.45
ENSG00000279689.1	AC022400.9	-1.64375	-0.716988	0.00590199	0.0162239	-2.229	1.56001	0.641558	0.00673978	0.0218182	2.17135	0.19	0.26	0.18	0.23	0.14	0.15	0.11	0.1	0.26	0.29	0.35	0.28
ENSG00000279923.1	AC022417.1	-1.35324	-0.436421	0.0480094	0.0907131	-1.31867	-1.40939	-0.495073	0.048498	0.103081	-1.31428	0.48	0.62	0.63	0.61	0.56	0.32	0.39	0.39	0.22	0.39	0.45	0.33
ENSG00000280399.1	AC022497.1	-1.15383	-0.20643	0.498565	0.59684	-0.302278	-1.21592	-0.282044	0.391847	0.51343	-0.406883	0.14	0.11	0.18	0.09	0.13	0.15	0.08	0.08	0.05	0.09	0.09	0.1
ENSG00000279891.1	AC022498.2	1.02997	0.0426001	0.831156	0.87578	0.0803176	-1.18179	-0.240977	0.086843	0.163234	-1.06127	1.94	2.17	2.81	3.02	3.18	3.04	1.73	1.97	1.92	2.07	1.54	1.98
ENSG00000259644.1	AC022613.3	-1.12861	-0.17455	0.34364	0.445857	-0.463896	1.08448	0.116998	0.5088	0.621124	0.293453	1.2	1.46	1.98	2.17	1.86	1.51	1.09	1.36	1.95	1.29	1.51	1.63
ENSG00000267940.1	AC022762.2	-2.09279	-1.06543	0.00951521	0.0241059	-2.02158	-1.3788	-0.463413	0.0888503	0.166167	-1.05134	0.5	0.36	0.63	0.8	0.28	0.44	0.12	0.23	0.26	0.37	0.39	0.29
ENSG00000248538.7	AC022784.1	2.89194	1.53204	1.96e-07	7.97e-06	6.70679	1.56926	0.650088	0.000215574	0.00150752	3.6664	2.77	2.59	2.91	2.78	7.46	8.18	8.06	7.89	4.03	4.39	3.75	3.69
ENSG00000259921.1	AC022819.1	-2.50593	-1.32534	0.00226794	0.00747105	-2.64437	1.07447	0.103626	0.622889	0.719264	0.205589	0.13	0.13	0.16	0.19	0.03	0.1	0.03	0.07	0.16	0.1	0.14	0.16
ENSG00000258677.2	AC022826.2	3.59924	1.84769	0.0698837	0.123028	1.15562	3.26552	1.70731	0.0981245	0.179584	1.00822	2.18	1.46	0.41	0.01	1.12	2.34	1.91	2.5	1.77	1.58	0.68	2.96
ENSG00000253636.1	AC022893.1	1.26539	0.339584	0.126307	0.199439	0.898571	1.10521	0.14432	0.464115	0.579876	0.333375	0.44	0.53	0.62	0.99	0.87	0.96	0.61	0.62	0.66	0.69	0.51	0.54
ENSG00000266947.1	AC022916.1	-1.21757	-0.284006	0.35975	0.462211	-0.443999	-1.55556	-0.637438	0.110589	0.197531	-0.956287	0.26	0.21	0.17	0.25	0.32	0.16	0.23	0.1	0.1	0.18	0.15	0.05
ENSG00000260747.1	AC022968.1	1.33105	0.412566	0.0938826	0.156626	1.02742	1.16312	0.218002	0.244678	0.361936	0.611405	2.23	2.99	3.03	3.26	2.64	4.92	4.49	3.33	2.7	2.75	2.58	3.91
ENSG00000279970.1	AC023024.2	-3.40518	-1.76773	0.000256752	0.00130398	-3.59049	-1.48698	-0.572383	0.0503179	0.10615	-1.29828	0.41	0.22	0.33	0.48	0.13	0.1	0.07	0.04	0.2	0.16	0.19	0.18
ENSG00000279077.1	AC023090.2	1.07478	0.104037	0.704918	0.778111	0.151861	1.27537	0.350918	0.0874414	0.164204	1.05828	0.18	0.25	0.35	0.31	0.48	0.22	0.24	0.21	0.27	0.27	0.29	0.3
ENSG00000276900.1	AC023157.3	1.56246	0.643823	0.00693466	0.0185739	2.15898	1.00963	0.0138278	0.95062	0.969021	0.0219928	0.45	0.56	0.39	0.46	0.63	0.87	0.64	0.7	0.49	0.34	0.32	0.5
ENSG00000259488.2	AC023355.1	-1.17192	-0.22887	0.0972826	0.161413	-1.01196	-1.14368	-0.193686	0.139641	0.236811	-0.854988	0.59	0.54	0.53	0.58	0.45	0.53	0.42	0.47	0.41	0.47	0.44	0.4
ENSG00000265713.1	AC023389.2	-1.36606	-0.450025	0.179893	0.264593	-0.744987	-1.60075	-0.678751	0.0655332	0.130627	-1.18354	1.29	1.35	2.75	3.09	2.26	0.98	1.39	1.1	1.29	1.06	0.59	1.5
ENSG00000257379.1	AC023509.1	-1.30236	-0.381126	0.400241	0.502973	-0.397679	1.33926	0.421437	0.422254	0.54269	0.374426	0.12	0.49	0.25	0.42	0.23	0.11	0.22	0.25	0.36	0.43	0.1	0.43
ENSG00000278434.1	AC023830.3	1.15974	0.213796	0.303351	0.403314	0.518054	1.20373	0.267511	0.180511	0.286638	0.743496	0.59	0.98	0.88	1.18	1.35	0.93	0.84	0.9	1.09	0.86	0.94	0.85
ENSG00000242327.1	AC023906.1	-1.09674	-0.133219	0.613951	0.703552	-0.211866	-1.1456	-0.196099	0.479555	0.594058	-0.319161	2.64	5.74	5.48	4.34	4.07	3.48	4.85	3.08	3	4.86	3.14	2.76
ENSG00000261136.1	AC023908.3	-1.54638	-0.628899	0.00207195	0.00696427	-2.68362	-1.10875	-0.148929	0.442035	0.559208	-0.354543	0.55	0.53	0.63	0.7	0.45	0.33	0.31	0.43	0.62	0.52	0.32	0.51
ENSG00000267904.1	AC024075.1	1.00366	0.00527137	0.982733	0.988894	0.00756459	1.11299	0.154445	0.465781	0.581254	0.331818	2.4	1.91	1.53	2.18	1.48	2	2.1	2.2	2.07	2.19	1.7	1.83
ENSG00000269044.2	AC024075.2	-1.26094	-0.334503	0.0244605	0.0520968	-1.61153	-1.15283	-0.205177	0.163034	0.265855	-0.787722	1.8	2.35	2.11	2.73	1.91	1.76	1.45	1.73	1.86	1.46	1.58	1.94
ENSG00000244313.3	AC024293.1	-1.07921	-0.10998	0.481488	0.580604	-0.317414	-1.10126	-0.139158	0.150652	0.250517	-0.822024	10.25	10.05	11.02	9.98	10.55	6.79	10.08	10.02	7.97	8.44	8.64	8.9
ENSG00000269924.1	AC024451.4	1.08653	0.119731	0.680097	0.75826	0.167429	1.14706	0.197939	0.333104	0.455476	0.47742	1.28	1.41	2.58	2.11	3.11	2.29	1.38	1.25	1.46	1.92	1.75	1.95
ENSG00000253558.1	AC024568.1	-1.03008	-0.042751	0.815956	0.864491	-0.0883331	-1.14503	-0.195386	0.413896	0.534654	-0.383109	0.39	0.5	0.68	0.73	0.52	0.67	0.44	0.46	0.51	0.59	0.31	0.35
ENSG00000267740.5	AC024592.3	1.90379	0.928877	0.00113155	0.00424101	2.94633	1.2218	0.289006	0.285078	0.406035	0.545037	1.34	1.55	1.35	1.13	2.87	2.69	2.02	3.04	0.98	1.94	1.61	1.28
ENSG00000275097.1	AC024940.6	1.68208	0.750246	0.0697998	0.122907	1.15615	1.17925	0.237865	0.535964	0.64532	0.270864	10.84	10.4	6.81	2.96	9.28	11.38	12.28	13.64	6.87	6.5	8.79	7.93
ENSG00000275481.1	AC025031.4	1.00437	0.0062917	0.967316	0.978008	0.0144314	1.00606	0.00872082	0.952724	0.970077	0.0210328	0.44	0.53	0.67	0.63	0.7	0.5	0.57	0.45	0.55	0.49	0.54	0.42
ENSG00000278896.1	AC025031.5	-1.07301	-0.101662	0.55776	0.652035	-0.253553	-1.07404	-0.103042	0.620185	0.71667	-0.207479	0.72	0.69	0.56	0.66	0.57	0.67	0.52	0.63	0.72	0.6	0.43	0.46
ENSG00000259388.1	AC025040.2	1.29396	0.37179	0.0895043	0.150625	1.04816	1.26075	0.334287	0.11364	0.202039	0.944467	0.23	0.42	0.39	0.42	0.42	0.44	0.43	0.49	0.35	0.43	0.34	0.43
ENSG00000267248.2	AC025048.2	-1.17178	-0.228705	0.342972	0.44517	-0.464742	1.23649	0.306249	0.195764	0.305047	0.708267	1.28	1.61	1.41	0.9	1.22	1.2	1.12	0.87	1.46	1.29	1.76	1.39
ENSG00000257815.5	AC025159.1	1.04954	0.0697567	0.691021	0.766796	0.160509	1.01936	0.0276598	0.872995	0.915952	0.0589881	3.39	3.27	3.51	2.63	2.57	3.47	3.84	3.55	3.14	3.18	3.68	2.49
ENSG00000177738.3	AC025171.1	1.29439	0.372277	0.000125123	0.000742075	3.90266	-1.04186	-0.0591607	0.312145	0.434752	-0.505643	8.25	7.56	9.8	9.34	10.12	10.41	8.99	10.49	9.5	9.04	8.43	9.98
ENSG00000215068.7	AC025171.2	-1.19265	-0.254172	0.0448107	0.0856993	-1.34862	-1.92847	-0.947459	5.09e-05	0.000514811	-4.2936	1.95	2.56	2.45	2.62	1.54	2.5	1.75	1.93	0.97	1.02	1.62	1.16
ENSG00000272086.1	AC025181.2	-1.44937	-0.535423	0.0421953	0.0816522	-1.37474	-1.14684	-0.197662	0.376546	0.498439	-0.424182	1.39	1.25	1.42	1	1.11	0.73	0.91	0.62	0.85	1.15	1.03	0.81
ENSG00000256664.1	AC025423.2	1.37573	0.460202	0.00141073	0.00508939	2.85056	-1.11416	-0.155951	0.237307	0.354079	-0.624689	30.32	26.7	36.78	35.63	43.85	45.84	37.98	41.42	31.45	23.15	24.68	28.02
ENSG00000285999.1	AC025442.2	1.17029	0.226867	0.356634	0.459405	0.447777	-1.36163	-0.445333	0.0339577	0.0779013	-1.46906	0.61	0.69	0.58	0.56	0.92	0.9	0.66	0.43	0.44	0.36	0.34	0.42
ENSG00000270558.1	AC025449.1	1.595	0.673558	0.0227972	0.0492146	1.64212	1.62941	0.704347	0.0187214	0.0487055	1.72766	3.62	3.32	4.05	1.75	5.17	4.47	4.69	4.95	3.95	4.59	4.82	4.53
ENSG00000258168.5	AC025569.1	3.96709	1.98808	5.72e-09	1.05e-06	8.24273	3.43777	1.78147	4.6e-08	4.04e-06	7.33706	1.42	0.86	1.3	1.17	3.61	4.07	3.35	4.16	2.85	3.32	3.63	3.57
ENSG00000275106.1	AC025594.2	-1.5202	-0.604265	0.144813	0.222096	-0.839191	1.05075	0.0714203	0.856431	0.903454	0.0673079	0.62	0.31	0.87	1.02	0.25	0.35	0.44	0.45	0.69	0.45	0.38	0.61
ENSG00000279092.1	AC025678.3	1.03477	0.0493075	0.853476	0.892792	0.0688086	1.02108	0.0300922	0.895794	0.931682	0.0477917	1.02	1.07	1.72	2.28	1.78	1.79	0.93	1.34	1.55	1.45	1.03	1.33
ENSG00000258012.1	AC026111.1	-1.89589	-0.922879	0.0820682	0.140417	-1.08583	-1.16643	-0.222098	0.564827	0.670478	-0.248084	0.24	0.24	0.61	0.65	0.3	0.33	0.05	0.16	0.36	0.24	0.15	0.26
ENSG00000250280.2	AC026124.1	1.89462	0.921907	0.000368844	0.00173603	3.43316	1.38588	0.470805	0.00156309	0.00692819	2.80602	0.81	0.83	1.21	1.01	2.17	2	1.33	1.51	1.25	1.19	1.14	1.14
ENSG00000276853.1	AC026124.2	-1.27536	-0.350902	0.0719241	0.126062	-1.14313	1.01202	0.0172399	0.928927	0.954778	0.0320186	1.83	1.97	2.29	2.07	1.27	1.47	1.66	1.74	2.53	1.79	1.35	1.73
ENSG00000245522.2	AC026250.1	-1.19342	-0.255103	0.209508	0.300046	-0.678799	1.09448	0.130248	0.528529	0.63829	0.276931	0.29	0.29	0.36	0.25	0.24	0.27	0.22	0.23	0.25	0.23	0.33	0.3
ENSG00000174977.8	AC026271.1	-1.0856	-0.118497	0.146279	0.223749	-0.834817	-1.04762	-0.0671105	0.428357	0.547207	-0.368195	5.96	6.2	6.46	5.94	5.81	5.13	5.12	5.29	5.65	5.6	4.9	5.03
ENSG00000264885.1	AC026271.3	-1.0036	-0.00518064	0.975827	0.983787	-0.0106271	1.05548	0.0778949	0.670119	0.75746	0.173848	0.54	0.75	0.64	0.96	0.76	0.7	0.57	0.68	0.68	0.59	0.76	0.58
ENSG00000286156.1	AC026273.1	1.22631	0.294324	0.250039	0.345346	0.601993	1.40044	0.485877	0.0211215	0.0535626	1.67528	0.96	1.57	1.49	1.96	1.88	2.49	1.7	1.07	1.94	1.7	1.45	2.14
ENSG00000268129.1	AC026304.1	1.05934	0.0831648	0.82111	0.868644	0.0855985	1.00031	0.00044086	0.998867	0.999305	0.000492159	0.94	1.77	1.55	0.89	0.95	0.88	1.43	1.97	0.66	1.09	1.29	1.12
ENSG00000274964.1	AC026356.1	1.39591	0.481203	0.265022	0.361467	0.576718	-1.2721	-0.347218	0.371921	0.494041	-0.429549	0.27	0.45	1.11	0.96	1.38	1.06	0.48	0.65	0.42	0.44	0.3	0.4
ENSG00000276115.1	AC026356.2	1.23391	0.303242	0.334292	0.436775	0.475874	-1.95552	-0.96755	0.0123199	0.0351258	-1.90939	0.45	0.31	0.44	0.89	0.75	0.81	0.38	0.51	0.26	0.14	0.24	0.18
ENSG00000256028.2	AC026362.1	-1.10068	-0.138394	0.39701	0.499688	-0.401199	1.11918	0.162445	0.396163	0.51777	0.402126	0.62	0.75	0.58	0.84	0.67	0.47	0.61	0.65	0.48	0.71	0.78	0.84
ENSG00000280381.1	AC026362.2	-1.4213	-0.50721	0.141879	0.218881	-0.848083	-1.30468	-0.383692	0.147976	0.247276	-0.829809	0.36	0.3	0.61	0.7	0.51	0.4	0.18	0.26	0.29	0.39	0.24	0.34
ENSG00000280206.1	AC026401.3	1.56551	0.646629	2.76e-05	0.000236446	4.55954	1.5043	0.589088	5.69e-05	0.000562803	4.24457	4.81	5.83	5.39	5.62	8.72	7.8	7.86	7.95	7.1	7.78	7.01	7.55
ENSG00000229119.3	AC026403.1	-1.00809	-0.0116296	0.927854	0.949074	-0.0325203	1.09783	0.134649	0.265294	0.384527	0.576272	39.32	36.6	31.28	34.82	28.91	34.66	39.93	34.9	38.78	41.39	31	35.42
ENSG00000248794.1	AC026436.1	1.31762	0.39794	0.13087	0.205302	0.883159	1.59558	0.674078	0.0266693	0.0643572	1.57399	19.75	21.96	13.12	10.21	19.29	20.13	22.74	20.7	17.38	25.96	25.55	24.69
ENSG00000234337.4	AC026462.1	-1.03776	-0.0534691	0.796717	0.849891	-0.0986959	-1.07896	-0.109641	0.519246	0.630412	-0.284627	2.44	3.52	3.08	2.53	2.41	3.77	2.77	2.09	2.03	2.36	2.53	2.6
ENSG00000260914.3	AC026464.4	-1.51814	-0.602301	0.000131746	0.00077286	-3.88026	1.03197	0.0454036	0.626338	0.721487	0.203191	22.29	20.96	25.11	28.79	16.72	15.82	13.57	15.24	23.17	23.77	22.22	26.47
ENSG00000272617.3	AC026464.6	-1.66964	-0.739533	6.28e-06	8.13e-05	-5.20174	1.01798	0.0257063	0.667941	0.755906	0.175262	21.43	20.23	23.25	23.58	11.54	11.83	12.55	14.11	22.13	20.23	20.78	21.31
ENSG00000102921.8	AC026470.1	-1.36428	-0.448137	2.83e-06	4.58e-05	-5.54813	1.13603	0.184005	0.00149572	0.00667212	2.82515	39.04	38.73	44.44	40.95	31.85	30.17	27.69	30.33	45.65	43.76	44.16	46.41
ENSG00000260267.1	AC026471.1	1.07421	0.10328	0.223614	0.315707	0.650501	-1.13544	-0.183256	0.0355578	0.0807217	-1.44906	1.98	2.05	2.02	2.42	2.32	2.06	2.2	1.96	1.75	1.57	1.67	1.71
ENSG00000280132.1	AC026471.6	-1.6441	-0.717298	0.04006	0.0782119	-1.39729	-1.1053	-0.144439	0.704726	0.78497	-0.15198	0.45	0.46	0.36	0.24	0.21	0.25	0.2	0.19	0.16	0.49	0.24	0.32
ENSG00000271781.1	AC026740.1	-1.15965	-0.213689	0.482391	0.581519	-0.316601	-1.91861	-0.940059	0.0202895	0.0519068	-1.69273	2.53	1.58	4.79	4.21	2.22	2.49	2.57	2.61	1.92	1.08	1.34	1.17
ENSG00000272103.2	AC026741.1	2.27204	1.18399	0.00108822	0.004109	2.96328	1.7709	0.824479	0.0107494	0.0314728	1.96862	0.12	0.3	0.23	0.26	0.59	0.41	0.48	0.4	0.31	0.35	0.27	0.32
ENSG00000240809.1	AC026877.1	1.2071	0.271548	0.303208	0.403205	0.518259	1.29215	0.369771	0.227704	0.343046	0.64263	0.57	0.76	0.55	0.48	0.51	0.69	0.76	0.75	0.39	0.96	0.65	0.69
ENSG00000285669.1	AC026979.4	1.36248	0.44624	0.0364951	0.0723955	1.43777	1.23241	0.301479	0.167508	0.271599	0.775966	0.19	0.34	0.32	0.4	0.37	0.48	0.39	0.37	0.38	0.28	0.28	0.39
ENSG00000254615.2	AC027031.2	2.5065	1.32567	1.04e-06	2.29e-05	5.98333	1.10526	0.14439	0.253188	0.37167	0.596558	1.39	1.39	1.48	1.72	3.89	3.21	3.89	3.23	1.7	1.46	1.38	1.3
ENSG00000267040.6	AC027097.1	1.15343	0.205935	0.430675	0.531848	0.365851	-1.12719	-0.172728	0.54505	0.65321	-0.263564	0.98	0.46	1.18	1.26	1.14	1.02	1.06	0.87	0.7	0.66	0.73	0.59
ENSG00000267787.6	AC027097.2	-1.04866	-0.0685515	0.828834	0.874359	-0.0815322	1.05366	0.0754065	0.690961	0.773907	0.160546	0.42	0.53	0.49	0.48	0.44	0.88	0.44	0.25	0.48	0.46	0.29	0.43
ENSG00000253671.2	AC027117.1	2.1137	1.07977	0.000561536	0.0024174	3.25062	1.61541	0.691901	0.0119562	0.0343329	1.92241	0.86	1.52	1.81	1	3.29	2.44	2.36	2.21	2.05	1.92	1.56	2.09
ENSG00000259426.5	AC027237.3	2.25989	1.17625	0.0149327	0.0348732	1.82586	2.01835	1.01317	0.0291723	0.0691864	1.53503	0.39	0.23	0.55	0.76	1.53	0.93	0.67	0.99	0.61	0.7	0.49	0.78
ENSG00000260816.2	AC027279.1	-1.25206	-0.324302	0.352888	0.455449	-0.452364	-1.40688	-0.492503	0.159607	0.261573	-0.796949	0.36	0.3	0.64	0.79	0.59	0.49	0.21	0.32	0.35	0.33	0.17	0.42
ENSG00000280190.1	AC027279.4	-1.14772	-0.198775	0.423372	0.525234	-0.373277	-1.57862	-0.658665	0.0196532	0.0506434	-1.70657	0.54	0.52	0.94	0.88	0.81	0.77	0.41	0.45	0.54	0.32	0.28	0.42
ENSG00000257894.2	AC027288.3	2.34876	1.2319	0.00044416	0.00201439	3.35246	1.51784	0.602019	0.0697515	0.137271	1.15645	0.31	0.29	0.28	0.31	1.32	0.65	0.69	0.71	0.39	0.44	0.56	0.26
ENSG00000280138.1	AC027290.2	1.01024	0.0146955	0.948553	0.963796	0.0229386	-1.2405	-0.310925	0.133922	0.229597	-0.873148	1.4	1.55	2.5	2.6	2.47	2.18	1.5	1.62	1.69	1.41	1.31	1.59
ENSG00000267317.2	AC027307.2	1.06342	0.0887081	0.456966	0.557501	0.340116	1.05138	0.0722811	0.565588	0.670985	0.2475	5.58	4.46	5.82	6.85	6.64	5.49	5.37	5.34	4.57	5.29	5.75	5.72
ENSG00000268798.1	AC027307.3	-1.3852	-0.47009	0.0343819	0.0689725	-1.46367	1.10526	0.144383	0.429851	0.548531	0.366682	1.05	0.81	0.87	1.08	0.56	0.73	0.66	0.69	1.09	0.95	0.81	0.83
ENSG00000285831.1	AC027329.1	1.18111	0.24014	0.0264957	0.0556772	1.57682	2.39317	1.25892	3.67e-08	3.44e-06	7.43566	1.02	1.06	1.03	1.03	1.1	1.22	1.15	1.19	2.21	2.24	2.16	2.43
ENSG00000260368.1	AC027373.1	2.26428	1.17905	0.000239733	0.00123655	3.62027	1.22973	0.298346	0.228447	0.343809	0.641215	1.12	0.78	1.75	1.49	3.26	3.09	2.31	2.28	1.62	1.31	0.98	1.51
ENSG00000266900.1	AC027514.1	1.35238	0.4355	0.0190271	0.0424805	1.72063	1.30972	0.389257	0.0474494	0.101256	1.32377	0.83	0.67	0.67	0.84	1.06	1.02	0.82	1.02	1.01	0.92	0.81	0.72
ENSG00000232531.3	AC027612.3	-1.07329	-0.102039	0.65694	0.739571	-0.182475	1.05163	0.0726212	0.726315	0.80199	0.138875	0.75	0.84	1.1	0.91	0.98	0.88	0.49	0.96	0.72	1.21	0.65	0.77
ENSG00000272831.1	AC027644.3	-1.31096	-0.390619	0.0241642	0.0515699	-1.61683	-1.0489	-0.0688751	0.60825	0.706995	-0.215918	5.09	5.14	4.53	4.64	3.27	3.89	3.42	3.91	3.72	4.24	4.18	4.4
ENSG00000284461.2	AC027644.4	1.37094	0.455168	0.129423	0.203498	0.887987	1.43293	0.518966	0.0623374	0.125681	1.20525	0.42	0.23	0.33	0.28	0.3	0.41	0.56	0.38	0.34	0.45	0.48	0.29
ENSG00000259804.1	AC027682.1	-2.43278	-1.2826	0.011807	0.0287773	-1.92786	1.01655	0.0236813	0.922782	0.950283	0.0349008	1.16	0.67	1.32	1.08	1.05	0.38	0.17	0.34	0.7	0.84	1.03	1.03
ENSG00000261386.2	AC027682.4	-1.98033	-0.985738	0.0100962	0.0252693	-1.99584	1.22623	0.294235	0.30577	0.428035	0.514605	0.75	1.49	1.43	1.7	0.55	0.97	0.38	0.51	0.94	1.75	1.27	1.03
ENSG00000280214.1	AC027682.7	-1.55494	-0.636863	0.00704602	0.0188347	-2.15206	1.24975	0.321638	0.0579044	0.118416	1.23729	0.96	1.28	1.1	1.21	1.03	0.53	0.59	0.74	1.25	1.63	1.12	1.08
ENSG00000260588.1	AC027702.1	1.1961	0.258335	0.61026	0.700214	0.214485	1.32657	0.407697	0.456704	0.572799	0.340365	0.08	0.35	0.19	0.41	0.28	0.13	0.26	0.29	0.16	0.26	0.16	0.23
ENSG00000262304.2	AC027796.3	-2.69353	-1.4295	0.178821	0.263328	-0.747581	-1.59185	-0.670706	0.157433	0.25882	-0.802905	0.13	0.14	0.34	0.42	0.32	0	0.13	0.16	0.13	0.1	0.23	0.06
ENSG00000274340.1	AC032011.1	-1.47043	-0.556241	0.170649	0.253624	-0.767895	-1.07557	-0.1051	0.755339	0.824687	-0.121858	0.39	0.39	0.26	0.23	0.13	0.31	0.25	0.12	0.18	0.16	0.28	0.29
ENSG00000260093.1	AC034111.1	1.13719	0.185476	0.384748	0.487171	0.414824	-1.43536	-0.521408	0.0492157	0.104246	-1.3079	0.11	0.22	0.21	0.18	0.21	0.2	0.19	0.17	0.11	0.09	0.11	0.09
ENSG00000271998.1	AC034229.3	-1.51276	-0.597179	0.75409	0.816974	-0.122577	1.3003	0.378843	0.816046	0.873507	0.0882856	0	0.26	0.33	0	0	0.95	0	0	0.21	0.21	0	0
ENSG00000249572.1	AC034231.1	-1.41591	-0.501733	0.0168764	0.0385234	-1.77272	-1.2342	-0.303573	0.074883	0.145164	-1.12562	2.62	2.94	2.8	3.35	2.7	1.8	2.02	1.56	2.44	1.86	1.81	2.17
ENSG00000185641.6	AC034236.1	-1.10515	-0.144237	0.302272	0.402345	-0.519601	-1.27491	-0.350395	0.0975461	0.178773	-1.01079	5.37	5.25	5.56	6.01	5.55	4.31	4.56	4.82	5.31	3.9	2.82	3.56
ENSG00000271918.1	AC034236.2	-1.28232	-0.358757	0.141647	0.218544	-0.848794	-1.14169	-0.191176	0.344511	0.467233	-0.462797	0.64	0.67	0.56	0.74	0.44	0.49	0.68	0.36	0.62	0.4	0.54	0.44
ENSG00000267430.1	AC036176.2	1.33242	0.414049	0.0646972	0.115658	1.18911	1.08117	0.112596	0.594847	0.696092	0.225595	0.91	0.8	1.37	0.99	1.12	1.72	1.08	1.35	1.11	0.99	0.66	1.09
ENSG00000272518.1	AC036214.2	1.3295	0.410879	0.0174747	0.0396097	1.75759	1.46915	0.554982	0.00296183	0.0114161	2.52844	3.7	3.63	4.77	3.16	5.03	4.58	4.36	5.44	5.32	5.25	5.04	4.35
ENSG00000276107.1	AC037198.1	1.08844	0.122257	0.540386	0.636227	0.267296	1.03096	0.0439861	0.820805	0.876703	0.08576	3.34	3.83	6.03	5.76	5.99	5.95	4.09	3.84	4.64	3.63	3.44	5.24
ENSG00000253200.1	AC037459.3	1.20821	0.272866	0.0356316	0.071022	1.44816	1.34032	0.422574	0.00173759	0.00752236	2.76005	1.06	1.11	1.07	1.26	1.52	1.46	1.17	1.09	1.5	1.37	1.28	1.23
ENSG00000278493.1	AC039056.2	-1.8033	-0.850636	0.00973912	0.0245541	-2.01148	1.1727	0.229836	0.415821	0.536578	0.381094	1.83	2.04	2.58	1.29	1.09	1.02	1.05	0.76	2.13	1.5	1.56	2.59
ENSG00000262691.1	AC040160.1	-6.30789	-2.65716	1.04e-05	0.00011672	-4.98226	1.02565	0.0365401	0.80729	0.866583	0.0929705	0.36	0.32	0.46	0.49	0.04	0.05	0.04	0.11	0.32	0.39	0.35	0.37
ENSG00000261884.2	AC040162.1	-2.21382	-1.14654	6.02e-05	0.000423715	-4.22066	-1.23556	-0.305169	0.0258558	0.0628876	-1.58744	2.77	1.69	2.64	1.93	0.77	0.4	0.8	0.66	2.05	1.36	1.52	1.2
ENSG00000263126.1	AC040162.3	-1.30561	-0.384719	0.0584621	0.106379	-1.23313	1.61704	0.693355	0.00233752	0.00950218	2.63125	0.33	0.25	0.39	0.47	0.29	0.3	0.21	0.24	0.49	0.48	0.43	0.62
ENSG00000274677.1	AC040169.3	-1.08357	-0.115788	0.682474	0.760231	-0.165914	-1.08722	-0.120638	0.600202	0.700564	-0.221703	0.82	1.31	1.84	1.35	1.53	1.7	0.8	0.83	1.04	0.89	0.9	1.17
ENSG00000253347.1	AC040934.1	-1.60148	-0.679403	0.0507301	0.0948794	-1.29473	-1.53175	-0.615181	0.155601	0.256613	-0.807987	0.74	1.13	1.5	1.65	0.99	1.01	0.52	0.42	1.35	0.5	0.23	0.56
ENSG00000253210.1	AC040970.1	-1.23088	-0.299689	0.357568	0.460457	-0.446641	-1.07089	-0.0988052	0.704182	0.784693	-0.152315	1.73	1.87	1.65	1.21	1.18	2.33	0.99	0.83	0.93	1.19	1.52	1.24
ENSG00000213862.4	AC044787.1	1.14707	0.197949	0.179655	0.264363	0.745561	1.12062	0.164293	0.239425	0.356441	0.62083	3.27	4.4	3.78	3.51	5.08	4.19	3.55	4.08	3.46	4.26	3.47	3.76
ENSG00000254951.7	AC044810.2	-1.53833	-0.621366	0.00243785	0.0079258	-2.61299	-1.14729	-0.198234	0.191977	0.300577	-0.716751	3	2.47	3.13	4.13	2.19	2.18	2.02	1.14	3.04	2.36	1.84	2.69
ENSG00000229212.8	AC044860.1	-1.10151	-0.13948	0.721497	0.791242	-0.141766	1.14137	0.190768	0.630119	0.724589	0.200578	2.11	0.9	0.88	2.06	1.31	1.4	1.35	0.5	2.12	0.99	1.39	0.94
ENSG00000236814.1	AC046176.1	1.20707	0.271509	0.156764	0.236747	0.804753	1.14436	0.194535	0.222587	0.337467	0.652501	2.8	2.73	2.57	2.14	2.54	2.66	3.32	3.4	2.8	3.02	2.25	2.4
ENSG00000279369.1	AC046185.3	1.40682	0.492439	2.04e-05	0.000189778	4.69048	-1.0923	-0.127365	0.0525712	0.110095	-1.27925	6.74	6.31	6.45	6.71	8.9	8.2	9.04	8.6	5.49	5.42	5.58	5.65
ENSG00000257354.2	AC048341.1	1.38143	0.466165	0.00609892	0.0166832	2.21475	1.15442	0.207169	0.24561	0.362823	0.609754	0.18	0.22	0.27	0.21	0.31	0.33	0.25	0.29	0.22	0.18	0.27	0.23
ENSG00000275180.1	AC048341.2	1.17976	0.23849	0.29932	0.399068	0.523865	1.15846	0.212211	0.365839	0.487745	0.43671	3.11	3.04	2.74	2.45	2.51	3.05	3.52	4.04	3.72	3.38	2.83	2.07
ENSG00000277342.1	AC048344.4	-1.26046	-0.333955	0.0619184	0.111552	-1.20818	-1.59749	-0.675803	0.00245382	0.00988948	-2.61016	2.06	2.64	2.88	3.17	1.99	2.47	1.86	1.85	1.22	1.35	1.57	1.54
ENSG00000278983.1	AC048380.2	-1.06682	-0.0933204	0.714033	0.785162	-0.146282	-1.09445	-0.130206	0.625404	0.720785	-0.20384	0.43	0.5	0.83	0.93	0.79	0.72	0.39	0.51	0.71	0.47	0.34	0.6
ENSG00000259244.1	AC048382.2	1.13666	0.184796	0.542621	0.63811	0.265503	1.40762	0.493255	0.119831	0.210772	0.921431	0.76	0.91	1.52	2.32	1.51	1.16	1.37	1.41	1.33	1.55	1.36	1.54
ENSG00000259932.1	AC051619.7	1.25577	0.328577	0.16039	0.241137	0.794823	1.35975	0.443339	0.155805	0.256834	0.807418	0.74	1.27	1.8	1.39	1.56	1.51	1.5	1.5	1.01	1.68	1.22	2.05
ENSG00000260035.1	AC051619.8	1.00203	0.00293251	0.981658	0.988066	0.00803977	1.26592	0.340181	0.0410793	0.0904503	1.38638	51.19	72.26	73.23	59.91	54.33	62.06	66.04	62.97	71.46	94.28	73.82	69.84
ENSG00000256973.1	AC053513.1	1.17889	0.237433	0.362129	0.464856	0.441136	-1.2683	-0.342901	0.206544	0.317753	-0.684988	1.02	1.44	2.59	2.16	1.94	2.07	1.46	2.32	1.4	1.28	0.97	1
ENSG00000247373.3	AC055713.1	-1.21396	-0.279716	0.178315	0.262654	-0.748813	-1.23802	-0.308034	0.108687	0.194944	-0.963824	0.43	0.33	0.56	0.65	0.48	0.43	0.28	0.34	0.33	0.38	0.36	0.29
ENSG00000278864.1	AC055811.4	-1.38742	-0.47241	0.0814549	0.13953	-1.08908	-1.54205	-0.624853	0.0253443	0.0619167	-1.59612	3.47	3.79	5.94	8	4.39	3.77	2.93	2.79	3.01	3.39	2.4	3.03
ENSG00000267253.1	AC055813.1	1.04717	0.0664899	0.837849	0.88077	0.0768342	1.35551	0.438832	0.143343	0.241655	0.843624	0.26	0.16	0.26	0.15	0.3	0.21	0.21	0.1	0.25	0.18	0.2	0.26
ENSG00000267102.1	AC060766.1	-1.09716	-0.133779	0.562141	0.656281	-0.250155	-1.06786	-0.0947191	0.701787	0.782743	-0.153795	4.59	5.34	2.77	4.38	3.79	3.64	3.48	3.96	3.33	4.37	3.54	2.76
ENSG00000267547.1	AC060766.4	-1.11931	-0.16261	0.452946	0.553566	-0.343954	-1.12189	-0.165932	0.511862	0.62391	-0.290847	1.39	1.66	1.4	1.37	1.1	1.37	1.04	1.48	1.34	0.7	0.87	1.42
ENSG00000267648.1	AC060766.5	1.09656	0.13298	0.756898	0.81907	0.120963	1.077	0.107017	0.791419	0.854267	0.101594	0.82	0.91	0.37	1.02	1.03	1.35	0.55	0.43	0.72	0.69	0.49	0.55
ENSG00000267745.1	AC060766.7	-1.02053	-0.0293229	0.784861	0.840956	-0.105207	-1.23889	-0.309054	0.0140208	0.0387536	-1.85323	3.3	3.15	4.42	4.08	3.66	3.64	3.09	3.51	2.63	2.62	2.63	2.77
ENSG00000267002.3	AC060780.1	-1.31563	-0.395754	0.00726314	0.0193004	-2.13888	-1.24434	-0.315377	0.0145182	0.0397902	-1.83809	3.63	3.6	3.96	4.44	3.05	2.94	2.57	2.5	3.18	3.32	2.81	2.82
ENSG00000268531.3	AC060814.3	-2.81779	-1.49456	1.3e-05	0.00013596	-4.88637	-1.98568	-0.989631	2.97e-06	6.71e-05	-5.52796	2.38	2.38	3.21	2.75	0.97	0.61	1.09	0.96	1.14	1.21	1.18	1.22
ENSG00000258033.1	AC063947.2	1.14518	0.195569	0.488639	0.587783	0.311012	1.29962	0.378086	0.256064	0.374826	0.591652	0.22	0.48	0.6	0.61	0.5	0.54	0.43	0.51	0.36	0.59	0.4	0.64
ENSG00000258230.2	AC063950.1	-1.11102	-0.151891	0.524001	0.620274	-0.280667	-1.1576	-0.211135	0.3166	0.43916	-0.499489	2.02	2.23	1.83	2.48	2.37	2.02	1.55	1.72	1.24	1.42	1.23	2.06
ENSG00000212664.5	AC064799.1	1.08369	0.115948	0.740098	0.805683	0.130711	1.14596	0.196553	0.510853	0.622917	0.291704	1.68	1.93	1.3	1	0.92	1.47	2.06	1.82	1.47	1.05	1.84	1.31
ENSG00000260586.2	AC064799.2	-1.00293	-0.00422206	0.987596	0.991515	-0.00542086	1.39276	0.477942	0.0639961	0.128088	1.19385	0.44	0.51	0.74	1.13	0.9	0.74	0.52	0.41	0.75	0.81	0.81	0.69
ENSG00000279236.1	AC064801.2	1.24013	0.310489	0.0905216	0.151879	1.04325	-1.18194	-0.241158	0.24617	0.363571	-0.608765	0.53	0.62	0.79	0.67	0.89	0.95	0.65	0.66	0.37	0.54	0.39	0.61
ENSG00000228801.5	AC064807.1	1.42193	0.50785	0.00553776	0.0153861	2.25667	1.26734	0.341801	0.0356444	0.0809005	1.44801	2.35	2.43	2.35	2.53	3.84	3.52	2.61	2.72	2.28	2.39	2.47	3.11
ENSG00000235651.1	AC064850.1	-1.35816	-0.441658	0.105864	0.172665	-0.975252	-1.20787	-0.272471	0.298926	0.420886	-0.524437	0.53	0.64	1.02	1.1	0.74	0.67	0.36	0.52	0.66	0.43	0.44	0.78
ENSG00000272631.1	AC067750.1	-1.51375	-0.598127	0.00104289	0.00397025	-2.98176	-1.07581	-0.105428	0.401235	0.522648	-0.396602	0.39	0.41	0.36	0.45	0.26	0.24	0.24	0.28	0.37	0.29	0.32	0.33
ENSG00000272338.2	AC067838.1	1.10396	0.142683	0.613635	0.703345	0.21209	-1.21259	-0.278092	0.123401	0.21558	-0.908683	1.38	1.69	1.56	1.7	2.81	1.39	1.06	2.03	1.06	1.04	1.24	1.08
ENSG00000266962.2	AC067852.2	-1.33786	-0.419928	0.000315012	0.0015321	-3.50167	-1.45348	-0.539508	2.67e-05	0.000318203	-4.57325	5.18	5.2	4.99	4.84	3.54	3.42	3.73	3.5	3.15	3.26	3.03	3.28
ENSG00000267632.1	AC067852.3	-1.09749	-0.134202	0.358564	0.461133	-0.445433	-1.05902	-0.0827285	0.61904	0.715741	-0.208281	1.77	1.41	2.25	2.3	1.92	1.67	1.42	1.63	1.49	1.65	1.26	1.95
ENSG00000279605.1	AC067930.5	-1.36199	-0.445718	0.131414	0.205875	-0.88136	1.17178	0.228704	0.428098	0.547166	0.368457	0.08	0.12	0.1	0.21	0.1	0.11	0.06	0.07	0.13	0.1	0.09	0.15
ENSG00000279766.1	AC067931.1	-1.05933	-0.0831569	0.670472	0.750682	-0.173619	-1.04224	-0.0596868	0.724585	0.800744	-0.139911	1.72	2.13	2.52	3.02	2.33	2.42	1.51	2.31	2.28	1.79	1.68	2.06
ENSG00000248113.2	AC067942.2	1.12362	0.168152	0.4904	0.589463	0.30945	1.05426	0.0762319	0.71929	0.796323	0.143096	0.49	0.42	0.49	0.75	0.72	0.42	0.56	0.63	0.59	0.44	0.44	0.41
ENSG00000267022.1	AC067968.1	1.8828	0.912879	0.671066	0.751191	0.173235	2.60286	1.3801	0.402699	0.524076	0.39502	0	0.2	0	0.33	0	0.63	0.37	0	0.14	0.19	0.1	0
ENSG00000251485.1	AC068134.3	-1.14964	-0.201183	0.505381	0.603393	-0.296382	1.38938	0.474444	0.201272	0.311627	0.696216	0.47	1.06	0.73	1.12	0.66	0.91	0.47	0.65	0.96	0.5	1.03	1.48
ENSG00000262879.5	AC068152.1	-1.09092	-0.125541	0.379936	0.482171	-0.42029	1.1958	0.257982	0.099783	0.181829	1.00094	6.58	5.89	7.47	5.36	5.13	6.37	5.36	6.01	5.61	6.67	7.87	7.81
ENSG00000283341.1	AC068205.2	1.1811	0.24013	0.129202	0.203296	0.88873	-1.19757	-0.260115	0.108618	0.194864	-0.9641	1.72	1.59	1.3	1.45	1.78	1.49	1.73	1.84	0.98	1.22	1.07	1.25
ENSG00000283393.1	AC068205.3	1.05175	0.0727933	0.768532	0.828599	0.114338	1.0286	0.0406782	0.864645	0.909482	0.0631621	8.1	9.68	10.04	4.67	8.57	8.61	8.68	6.53	6.68	6.84	7.32	8.04
ENSG00000283483.1	AC068205.4	1.31166	0.391388	0.187951	0.274155	0.725955	-1.97786	-0.983939	0.317548	0.440093	-0.498191	1	0.99	1.7	2.34	2.32	2.49	1.26	1.41	1.52	1.98	0.99	0
ENSG00000260274.1	AC068338.2	-1.12848	-0.17438	0.518529	0.615101	-0.285227	-1.12283	-0.167144	0.618074	0.715109	-0.20896	0.75	0.47	0.47	0.53	0.41	0.49	0.61	0.37	0.49	0.26	0.67	0.32
ENSG00000237161.4	AC068446.1	-1.55667	-0.638465	0.0821842	0.140586	-1.08521	-1.04663	-0.0657527	0.821765	0.877397	-0.0852526	0.29	0.21	0.45	0.53	0.24	0.35	0.18	0.12	0.2	0.34	0.3	0.27
ENSG00000274828.1	AC068473.5	-1.49712	-0.582188	0.0480093	0.0907131	-1.31867	-1.5115	-0.595979	0.0422313	0.0924142	-1.37437	0.75	0.54	0.8	0.56	0.34	0.35	0.59	0.4	0.39	0.38	0.53	0.25
ENSG00000270190.1	AC068491.3	-1.18541	-0.245382	0.428719	0.529958	-0.367828	-1.29879	-0.377172	0.137676	0.2343	-0.861141	4.3	4.48	9.83	7.44	7.56	6.74	3.66	3.51	4.08	4.14	3.75	4.82
ENSG00000279191.1	AC068491.4	1.04208	0.0594718	0.768163	0.828385	0.114547	1.02971	0.0422356	0.737033	0.810803	0.132513	13.03	15.28	19.93	16.57	21.5	20.81	12.41	13.13	17.43	16.39	13.33	17.07
ENSG00000249319.2	AC068533.4	-1.6934	-0.759919	0.00419412	0.0122003	-2.37736	1.37425	0.458644	0.0397234	0.0881902	1.40095	3.81	2.17	3.37	3.64	2.21	1.87	1.38	1.89	3.06	4.34	3.58	4.8
ENSG00000250644.3	AC068580.4	-1.44692	-0.532985	0.0161376	0.0371881	-1.79216	-1.65177	-0.724011	0.00430213	0.0153674	-2.36632	1.41	1.57	1.72	2.28	1.41	0.96	1.09	1.41	1.06	0.71	0.99	1.1
ENSG00000283674.2	AC068587.4	1.27039	0.345273	0.379263	0.481619	0.42106	-1.59427	-0.672893	0.0686129	0.135581	-1.16359	2.14	2.08	3.6	5.03	5.02	4.74	2.15	2.84	1.95	1.64	1.67	1.97
ENSG00000283149.1	AC068631.2	1.27245	0.347612	0.0190035	0.0424336	1.72117	-1.023	-0.0328108	0.785669	0.849694	-0.10476	66.64	64.46	61.32	44.99	65.26	76.42	77.82	72.03	54.45	53.81	58.63	52.52
ENSG00000269938.1	AC068790.2	-1.18538	-0.245346	0.366409	0.469048	-0.436034	-1.21591	-0.282038	0.158656	0.260389	-0.799542	2.26	2	3.05	2.77	2.79	3.16	1.38	1.4	1.86	1.9	1.3	2.13
ENSG00000284946.1	AC068831.7	-1.66191	-0.732838	9.13e-07	2.09e-05	-6.03974	-1.03467	-0.0491722	0.561452	0.667644	-0.250687	1.67	1.76	1.67	1.83	1	0.94	0.99	0.98	1.68	1.31	1.59	1.62
ENSG00000279266.1	AC068860.1	-2.32066	-1.21453	0.00304173	0.00944548	-2.51688	-1.94505	-0.959811	0.0245711	0.0604711	-1.60958	0.12	0.09	0.23	0.19	0.08	0.06	0.05	0.04	0.12	0.04	0.05	0.04
ENSG00000277782.1	AC068870.2	1.05832	0.0817748	0.699868	0.774258	0.154984	-1.06118	-0.0856747	0.699337	0.781264	-0.155313	3.21	3.75	5.59	5.45	5.15	4.99	3.24	4.85	2.85	3.44	3.37	5.04
ENSG00000279834.1	AC068870.3	2.63428	1.39741	2.5e-06	4.2e-05	5.60213	1.2505	0.32251	0.110611	0.197531	0.956202	0.31	0.34	0.39	0.51	1	1.13	0.87	0.89	0.4	0.34	0.38	0.55
ENSG00000257337.6	AC068888.1	-1.55016	-0.632414	0.00301106	0.0093718	-2.52128	-1.15314	-0.205563	0.12028	0.211353	-0.919806	1.76	2.65	2.31	2.32	1.69	2.39	1.42	1.34	1.99	1.68	2.04	1.72
ENSG00000258539.1	AC068896.1	1.04538	0.0640326	0.86077	0.897853	0.0651128	1.12639	0.171703	0.625494	0.720785	0.203777	0.17	0.2	0.51	0.6	0.4	0.39	0.21	0.33	0.3	0.23	0.37	0.34
ENSG00000284820.1	AC068946.2	-1.28244	-0.358886	0.24163	0.335756	-0.616849	1.91859	0.940046	0.000478766	0.00276048	3.31988	1.54	1.5	0.85	1.17	0.85	0.58	1.33	0.96	2.01	2.13	2.38	2.18
ENSG00000213169.3	AC069218.1	1.29384	0.37166	0.249686	0.344907	0.602607	1.40698	0.492599	0.121879	0.213436	0.91407	1.82	2.52	1.42	1.12	1.97	2.46	2.66	1.47	1.82	2.55	2.38	1.64
ENSG00000274272.1	AC069281.2	-1.27639	-0.352072	0.142798	0.219881	-0.845277	1.29376	0.371571	0.328244	0.450737	0.483803	0.22	0.13	0.21	0.16	0.14	0.13	0.15	0.12	0.22	0.13	0.13	0.4
ENSG00000286192.1	AC069288.1	1.34413	0.426673	0.00158005	0.00559305	2.80133	1.07093	0.098865	0.333546	0.455864	0.476844	4.25	4.42	3.54	3.55	4.93	5.42	4.86	5.22	3.99	4.17	3.74	4.1
ENSG00000241634.1	AC069499.1	-1.13614	-0.184137	0.351713	0.454222	-0.453812	-1.27068	-0.3456	0.139325	0.236426	-0.855972	1.76	2.21	2.5	2.79	1.92	2.6	1.51	1.95	1.97	1.34	1.02	1.96
ENSG00000256950.2	AC069503.2	1.20565	0.269809	0.232626	0.325986	0.633342	1.25366	0.326147	0.0856396	0.161427	1.06733	0.72	0.54	0.7	0.81	0.88	1.15	0.62	0.57	0.67	0.76	0.58	0.89
ENSG00000272853.1	AC069544.1	1.04476	0.0631766	0.767062	0.827581	0.115169	-1.13601	-0.183978	0.424998	0.544486	-0.371613	0.89	0.91	1.37	0.84	0.85	1.04	0.93	1.17	1.02	0.7	0.72	0.61
ENSG00000259826.1	AC072061.1	-1.11785	-0.160723	0.401435	0.504082	-0.396384	-1.08562	-0.118524	0.498215	0.611376	-0.302584	0.34	0.29	0.35	0.35	0.4	0.28	0.25	0.23	0.27	0.21	0.26	0.29
ENSG00000235499.1	AC073046.1	-1.58479	-0.664293	0.0255813	0.0540714	-1.59208	-1.20559	-0.269736	0.146209	0.245066	-0.835025	4.53	5.15	5.98	7.85	4.42	5.55	2.51	2.55	3.65	4.48	3.97	4.89
ENSG00000228446.2	AC073052.1	-1.01021	-0.0146533	0.951775	0.966459	-0.0214659	1.80479	0.851833	0.00035411	0.00219153	3.45086	1.73	1.31	1.6	1.97	1.86	2.4	1.06	1.29	2.51	2.88	2.21	2.84
ENSG00000179428.2	AC073072.1	1.61911	0.695198	0.0215025	0.0468948	1.66751	1.68076	0.74911	0.0108108	0.0316061	1.96614	0.32	0.41	0.32	0.24	0.61	0.54	0.52	0.35	0.44	0.42	0.41	0.49
ENSG00000272604.1	AC073073.2	-1.63409	-0.708488	0.00120939	0.00447569	-2.91744	1.05787	0.0811593	0.571673	0.675947	0.242853	0.93	0.69	0.93	1.18	0.6	0.54	0.47	0.56	0.86	0.95	0.82	0.79
ENSG00000284691.1	AC073111.5	-1.3004	-0.378956	0.0902855	0.151577	-1.04438	-1.00162	-0.00233522	0.990123	0.993415	-0.00431082	0.67	0.87	0.55	0.58	0.51	0.54	0.61	0.43	0.79	0.52	0.54	0.62
ENSG00000237870.6	AC073130.1	-2.0844	-1.05963	0.0109852	0.0270882	-1.95919	-1.12504	-0.169982	0.582613	0.685639	-0.23462	0.48	0.46	1.5	0.89	0.69	0.34	0.31	0.32	0.78	0.47	0.65	0.85
ENSG00000223559.1	AC073136.1	1.17109	0.227857	0.287897	0.386416	0.540764	1.22037	0.287319	0.197014	0.306384	0.705503	0.19	0.3	0.31	0.27	0.3	0.32	0.36	0.21	0.23	0.37	0.28	0.24
ENSG00000283537.2	AC073264.3	-1.66743	-0.737627	0.224969	0.317233	-0.647878	1.14008	0.189133	0.70557	0.785391	0.15146	1.3	1.03	0.91	0.63	0.53	0.3	0.45	0.75	0.52	1.24	0.61	0.82
ENSG00000225187.1	AC073283.1	1.00231	0.0033313	0.992484	0.994412	0.00327657	1.12368	0.168232	0.588011	0.689859	0.230615	0.48	0.39	0.83	1.1	0.93	0.89	0.36	0.44	0.53	0.61	0.45	0.78
ENSG00000268170.2	AC073342.2	-1.3597	-0.443291	0.609276	0.699283	-0.215186	1.11902	0.162237	0.836824	0.888789	0.0773657	0.05	0.15	0.38	0.39	0.28	0.11	0.02	0.12	0.09	0.1	0.13	0.13
ENSG00000268584.1	AC073389.1	1.14928	0.200725	0.446728	0.547372	0.349957	1.08908	0.123107	0.656326	0.746438	0.18288	1.06	0.78	1.54	1.21	1.08	0.94	1.4	1.52	0.63	1.43	1.09	1.12
ENSG00000236047.1	AC073410.1	-1.87247	-0.904943	0.00692091	0.0185463	-2.15984	-1.11707	-0.159719	0.541833	0.650525	-0.266135	0.94	0.79	1.51	1.65	0.52	0.82	0.48	0.47	0.82	1.01	0.63	0.98
ENSG00000279328.1	AC073439.1	1.18696	0.247274	0.363658	0.466352	0.439307	1.17768	0.235942	0.436485	0.554517	0.360031	0.18	0.3	0.56	0.35	0.36	0.4	0.37	0.34	0.24	0.41	0.27	0.36
ENSG00000261096.1	AC073476.3	-1.76582	-0.820338	0.0168904	0.0385499	-1.77236	1.03219	0.0457125	0.852837	0.90095	0.0691338	0.3	0.38	0.66	0.78	0.34	0.33	0.19	0.23	0.38	0.42	0.48	0.46
ENSG00000257509.1	AC073487.1	1.26019	0.333645	0.0779218	0.134556	1.10834	1.32281	0.403603	0.0311752	0.0728348	1.50619	2.44	1.85	2.28	2.37	2.84	2.72	3.13	2.23	2.66	2.53	2.22	2.99
ENSG00000264058.2	AC073508.2	-1.2626	-0.3364	0.274403	0.372193	-0.561611	-1.26926	-0.343984	0.187726	0.295339	-0.726475	0.31	0.19	0.29	0.44	0.17	0.19	0.2	0.3	0.17	0.18	0.18	0.16
ENSG00000278834.1	AC073508.3	-1.13827	-0.186842	0.0607141	0.109798	-1.21671	-1.43244	-0.518479	0.00111209	0.00527729	-2.95386	2.55	2.39	2.65	2.78	2.26	2.11	2.13	2.18	1.34	1.81	1.5	1.79
ENSG00000234129.7	AC073529.1	1.22743	0.295645	0.15411	0.233305	0.81217	-1.00107	-0.00154278	0.993567	0.995933	-0.00280292	1.08	1.01	1.4	0.97	1.37	1.47	0.88	1.37	0.83	1.14	1.02	1.24
ENSG00000279861.1	AC073548.1	1.23284	0.301985	0.202557	0.291676	0.693453	1.10691	0.146534	0.374805	0.496844	0.426195	0.35	0.38	0.5	0.45	0.41	0.76	0.53	0.39	0.37	0.38	0.37	0.48
ENSG00000277130.1	AC073569.3	1.18522	0.245157	0.213372	0.304459	0.670863	-1.12998	-0.176296	0.56549	0.670968	-0.247575	0.92	0.8	1.29	1.17	1.38	1.21	0.93	1.27	1.17	1.04	0.46	0.58
ENSG00000255624.3	AC073585.1	-1.15597	-0.209098	0.0586029	0.106568	-1.23208	1.24128	0.311833	0.00403151	0.0145864	2.39453	2.58	2.51	2.43	2.63	2.51	1.95	1.99	2.01	2.83	3.02	2.7	2.81
ENSG00000286088.1	AC073585.2	1.3419	0.424277	0.169305	0.251903	0.771331	2.32474	1.21707	0.00674246	0.0218182	2.17118	0.34	0.15	0.25	0.19	0.37	0.35	0.23	0.22	0.39	0.43	0.74	0.33
ENSG00000280120.1	AC073857.1	-1.11505	-0.157113	0.344053	0.446287	-0.463375	-1.42912	-0.515126	0.0146035	0.0399965	-1.83554	1.68	2.23	1.79	1.63	1.82	1.56	1.48	1.49	0.93	1.18	1.06	1.28
ENSG00000242299.1	AC073861.1	-1.01996	-0.0285076	0.817803	0.865541	-0.0873513	1.04962	0.0698677	0.593432	0.694742	0.226629	17.9	14.86	14.54	12.92	14.12	14.26	14.38	14.1	13.14	13.9	15.75	14.85
ENSG00000152117.17	AC073869.1	-1.29549	-0.3735	0.000639198	0.00268533	-3.19436	1.14405	0.194154	0.0097834	0.0292223	2.00951	4.51	4.59	4.3	5.13	3.74	3.37	3.2	3.06	4.96	4.87	4.81	5.2
ENSG00000144785.8	AC073896.1	1.55847	0.640129	0.158154	0.238489	0.800921	-1.12306	-0.167432	0.636448	0.730345	-0.196237	1.44	2.55	2.11	4.34	6.69	1.45	4.14	2.55	2.68	0.9	1.54	2.26
ENSG00000257303.1	AC073896.2	-1.03883	-0.0549596	0.89636	0.924923	-0.0475176	-1.06844	-0.0955057	0.818879	0.875368	-0.0867805	2.57	1.24	3.09	2.39	1.89	0.95	3.53	2.18	2.29	1.98	2.2	0.81
ENSG00000257607.1	AC073957.2	1.03734	0.0528895	0.864882	0.901288	0.063043	1.06365	0.0890274	0.711986	0.790425	0.147529	0.7	0.62	1.09	1.59	1.33	1.34	0.64	0.65	0.94	0.77	0.74	0.99
ENSG00000273151.1	AC073957.3	-2.4987	-1.32118	0.0148608	0.0347302	-1.82796	-2.55384	-1.35267	0.00607554	0.0201638	-2.21642	0.06	0.09	0.13	0.21	0.11	0.05	0.02	0.02	0.05	0.02	0.02	0.04
ENSG00000284902.1	AC074008.1	-1.18915	-0.249925	0.372085	0.474585	-0.429358	-1.30724	-0.386522	0.129129	0.223174	-0.888977	0.28	0.52	0.58	0.47	0.43	0.48	0.39	0.21	0.29	0.27	0.35	0.24
ENSG00000259080.1	AC074091.1	-2.29845	-1.20066	0.0529795	0.09824	-1.27589	-1.43262	-0.518658	0.405876	0.526848	-0.391607	0.07	0.28	0.36	0.51	0.08	0.08	0.1	0.08	0.08	0.08	0.13	0.14
ENSG00000234072.1	AC074117.1	-1.3829	-0.467698	0.0123064	0.0297658	-1.90987	-1.17988	-0.238639	0.0721542	0.141037	-1.14174	1.04	1.41	1.17	1.14	0.8	0.79	0.91	0.56	0.7	0.92	0.81	0.99
ENSG00000283236.1	AC074141.1	3.26183	1.70568	5.39e-06	7.4e-05	5.26833	3.22598	1.68974	4.71e-05	0.000486775	4.32708	0.09	0.1	0.09	0.13	0.32	0.32	0.35	0.31	0.27	0.25	0.33	0.22
ENSG00000140939.14	AC074143.1	-1.98311	-0.987761	5.49e-08	3.72e-06	-7.26047	-1.12472	-0.169572	0.0203907	0.0520991	-1.69057	18.54	17.88	18.99	18.52	7.78	9.31	8.1	9.51	14.59	15.8	15.81	16.76
ENSG00000283355.1	AC074194.2	-2.13576	-1.09475	0.0084136	0.021744	-2.07502	-1.74734	-0.805163	0.013503	0.0377386	-1.86957	0.25	0.17	0.38	0.3	0.1	0.17	0.16	0.05	0.15	0.11	0.08	0.13
ENSG00000259605.3	AC074212.1	-1.47398	-0.55972	0.137252	0.213083	-0.862483	-1.93719	-0.953966	0.0871018	0.163643	-1.05997	0.17	0.24	0.53	0.55	0.24	0.22	0.2	0.15	0.02	0.29	0.08	0.15
ENSG00000233716.1	AC074367.1	-1.68904	-0.756205	0.0168078	0.0384101	-1.77449	1.06027	0.0844275	0.737262	0.810998	0.132378	0.63	0.65	1.19	0.79	0.73	0.48	0.36	0.29	0.79	0.81	0.46	0.89
ENSG00000284644.1	AC074386.1	-2.58681	-1.37117	0.000109137	0.00067111	-3.96203	-1.19396	-0.255757	0.239519	0.356547	-0.62066	2.83	2.5	3.66	4.92	1.33	1.32	1.05	1.2	3.02	2.54	1.85	2.43
ENSG00000269984.1	AC078795.1	-1.5798	-0.659746	0.0288298	0.0596528	-1.54016	-1.97153	-0.979315	0.0172297	0.0456166	-1.76372	0.13	0.14	0.23	0.24	0.1	0.17	0.09	0.07	0.08	0.11	0.03	0.08
ENSG00000270096.1	AC078795.2	-1.09147	-0.126268	0.660182	0.742065	-0.180336	-1.11725	-0.159952	0.58585	0.688284	-0.232213	0.33	0.57	0.69	0.76	0.68	0.71	0.36	0.33	0.28	0.33	0.52	0.59
ENSG00000269889.1	AC078802.1	-1.03971	-0.0561778	0.884256	0.91617	-0.0534221	1.18269	0.24207	0.422742	0.543095	0.373925	0.57	0.97	0.76	0.52	0.32	0.73	1.04	0.54	0.42	0.75	0.74	0.84
ENSG00000230291.5	AC078817.1	1.05701	0.0799823	0.776354	0.834603	0.10994	1.30165	0.380347	0.0697783	0.13729	1.15628	1.59	2.07	1.81	2.38	2.58	1.43	1.55	2.96	2.43	1.92	2.17	2.18
ENSG00000216285.5	AC078819.1	-1.20223	-0.265715	0.120577	0.191984	-0.918736	1.33136	0.412902	0.0120846	0.0346151	1.91777	3.24	4.07	3.48	4.53	2.52	3.6	3.29	2.85	4.38	5.41	4.45	3.95
ENSG00000273329.1	AC078846.1	-1.70418	-0.769079	1.44e-05	0.000147988	-4.84039	-1.16028	-0.21447	0.0290501	0.068945	-1.53685	3.18	3.02	3.62	4.12	2.09	1.97	1.69	1.97	3.02	2.78	2.63	2.83
ENSG00000225205.5	AC078883.1	-1.80572	-0.852577	0.000627496	0.00264785	-3.20239	1.66263	0.73347	0.000815078	0.00416046	3.0888	1.05	0.97	0.98	1.31	0.57	0.74	0.48	0.46	1.63	1.36	1.67	1.24
ENSG00000213985.4	AC078899.1	-1.21796	-0.284464	0.303695	0.403705	-0.517562	-1.15995	-0.214058	0.434285	0.552381	-0.362225	0.62	0.91	0.77	1.69	0.69	0.73	0.61	0.85	0.8	0.68	0.53	0.76
ENSG00000250321.1	AC079140.2	1.05966	0.0836013	0.744484	0.80936	0.128145	1.04857	0.0684276	0.78052	0.845726	0.107616	119.31	235.26	152.7	160.78	184.74	201.76	141.94	187.13	185	168.95	151.99	165.95
ENSG00000277715.1	AC079174.2	2.22248	1.15217	0.053922	0.0994929	1.26823	2.73872	1.4535	0.0487573	0.103508	1.31196	0.2	0.06	0.29	0.1	0.18	0.44	0.24	0.31	0.15	0.18	0.3	0.3
ENSG00000230979.3	AC079250.1	1.03812	0.0539734	0.716866	0.787238	0.144562	-1.23028	-0.298984	0.138651	0.235482	-0.858078	6.16	5.96	5.02	5.91	6.2	5.46	6.59	5	2.94	5.39	4.16	4.42
ENSG00000279176.1	AC079316.2	-1.68548	-0.753162	0.00864416	0.0222155	-2.06328	-1.16727	-0.223134	0.258937	0.377925	-0.586806	0.38	0.45	0.69	0.58	0.45	0.25	0.25	0.23	0.32	0.37	0.36	0.42
ENSG00000259394.2	AC079328.1	1.55416	0.636138	0.0380781	0.0749844	1.41933	1.37138	0.455627	0.101821	0.184721	0.992164	1.05	1.66	1.07	0.81	1.68	2.17	1.87	1.21	1.51	1.07	1.39	1.47
ENSG00000276007.1	AC079414.3	-1.51867	-0.602811	0.00223683	0.00739485	-2.65037	1.16273	0.217521	0.202432	0.313023	0.693721	1.69	2.08	1.98	1.75	1.29	1.3	1.21	0.96	2.2	1.63	1.69	2.32
ENSG00000261056.2	AC079416.1	-1.3381	-0.420186	0.087867	0.148301	-1.05617	1.10958	0.150012	0.427645	0.546718	0.368917	0.91	0.88	1.28	1.78	1.22	0.89	0.63	0.69	0.96	1.26	1.07	1.25
ENSG00000248710.1	AC079594.2	1.32835	0.40964	0.127709	0.201376	0.89378	-1.29198	-0.369579	0.219236	0.333262	-0.659089	0.52	0.47	0.35	0.4	0.56	0.83	0.4	0.54	0.33	0.28	0.17	0.44
ENSG00000280228.1	AC079753.1	-1.46596	-0.55185	0.0952517	0.158485	-1.02113	-1.24462	-0.315701	0.263084	0.382438	-0.579906	0.24	0.2	0.4	0.47	0.25	0.27	0.11	0.21	0.24	0.26	0.14	0.24
ENSG00000284707.1	AC079781.5	-1.25516	-0.327869	0.423981	0.525787	-0.372654	-1.2498	-0.321696	0.338489	0.460985	-0.470455	0.42	0.49	0.64	0.39	0.53	0.1	0.42	0.68	0.14	0.48	0.48	0.19
ENSG00000272944.1	AC079834.2	-1.30519	-0.384255	0.275488	0.373382	-0.559898	1.89428	0.921648	0.0184086	0.04809	1.73498	0.29	0.39	0.17	0.28	0.17	0.17	0.19	0.23	0.33	0.42	0.4	0.58
ENSG00000266371.1	AC079915.1	-1.19967	-0.262636	0.115899	0.185868	-0.93592	-1.19414	-0.255969	0.145731	0.24447	-0.836447	0.56	0.5	0.58	0.81	0.6	0.51	0.42	0.42	0.5	0.49	0.35	0.44
ENSG00000237753.1	AC079922.2	-1.25599	-0.328822	0.115985	0.185971	-0.935596	1.06995	0.0975401	0.669448	0.756969	0.174283	0.42	0.51	0.35	0.44	0.36	0.31	0.32	0.33	0.41	0.52	0.4	0.3
ENSG00000240207.6	AC080013.1	1.51795	0.602124	0.0196523	0.0436176	1.70659	-1.13159	-0.178347	0.460279	0.576051	-0.336979	0.86	1.24	2	1.27	2.39	2.09	1.49	1.7	1.24	0.99	0.88	0.83
ENSG00000254554.1	AC080023.1	-1.03752	-0.0531433	0.854186	0.89308	-0.0684476	1.03196	0.0453845	0.877085	0.918195	0.0569582	0.91	0.99	0.71	1.69	1.4	0.78	0.79	0.88	0.94	0.88	1.11	0.64
ENSG00000011028.14	AC080038.1	-1.1536	-0.206139	0.0222539	0.0482089	-1.65259	-1.12217	-0.166293	0.0519069	0.108965	-1.28478	11.14	10.62	9.53	9.65	8.44	8.26	8.84	8.69	8.35	9.2	8.73	8.48
ENSG00000279713.1	AC080038.4	2.04169	1.02977	0.000836393	0.0033315	3.07759	1.34596	0.42864	0.169363	0.273773	0.771182	0.38	0.36	0.3	0.27	0.68	0.55	0.62	0.69	0.22	0.45	0.42	0.45
ENSG00000279048.1	AC080080.1	1.15254	0.20482	0.433519	0.534626	0.362992	1.21454	0.280412	0.244343	0.361741	0.612	0.29	0.17	0.28	0.38	0.39	0.24	0.24	0.33	0.3	0.29	0.27	0.25
ENSG00000266208.1	AC080112.1	-2.42947	-1.28064	4.46e-06	6.4e-05	-5.35021	-1.66096	-0.732013	6.18e-06	0.000114428	-5.20936	2.21	2.31	2.48	2.75	0.84	0.85	1	1.17	1.27	1.43	1.24	1.29
ENSG00000279384.1	AC080188.2	1.53415	0.61744	0.0719266	0.126062	1.14311	1.20784	0.272433	0.28786	0.408943	0.540819	1.05	0.75	1.66	1.69	2.23	2.95	1.17	1.51	1.52	1.06	1.13	1.36
ENSG00000272758.5	AC083798.2	-1.35542	-0.438738	0.0697961	0.122907	-1.15617	-1.13129	-0.177969	0.387703	0.50942	-0.411501	1.39	1.49	1.79	2.48	1.46	1.76	0.96	1.57	1.35	1.7	1.32	1.88
ENSG00000203644.3	AC083799.1	1.15317	0.205605	0.0887868	0.149589	1.05165	-1.04505	-0.0635782	0.544078	0.652339	-0.264339	7.47	7.73	10.2	9.67	11.36	9.58	8.66	8.47	7.51	7.26	6.81	8.45
ENSG00000259820.1	AC083843.3	-1.31615	-0.396326	0.000476218	0.00212292	-3.32219	1.04911	0.0691672	0.402225	0.523558	0.395531	4.04	3.96	4.56	5.15	3.31	3.18	3.04	3.39	4.68	3.99	4.4	4.67
ENSG00000279518.1	AC083843.4	-1.11299	-0.154445	0.321508	0.42349	-0.492808	-1.15106	-0.202967	0.12539	0.218269	-0.901737	0.92	0.85	1.15	1.31	1.17	0.79	0.89	0.83	0.85	0.78	0.77	0.79
ENSG00000237821.1	AC083873.1	-1.38588	-0.470803	0.142825	0.219901	-0.845196	1.04878	0.0687127	0.816913	0.874143	0.0878243	0.64	0.55	0.33	0.61	0.36	0.29	0.43	0.35	0.48	0.36	0.53	0.39
ENSG00000204745.4	AC083899.1	-1.18357	-0.243142	0.0166349	0.0380901	-1.77898	1.10851	0.14862	0.0994108	0.181295	1.00257	1.19	1.33	1.37	1.53	1.11	1.11	1.14	0.97	1.33	1.44	1.22	1.43
ENSG00000274292.1	AC084018.2	1.44367	0.52974	0.0786558	0.135524	1.10427	-1.05678	-0.0796806	0.796346	0.85828	-0.0988984	0.26	0.3	0.17	0.21	0.27	0.32	0.3	0.38	0.23	0.12	0.21	0.16
ENSG00000253190.3	AC084082.1	1.35465	0.437918	0.0163235	0.0375311	1.78719	1.49089	0.576176	0.00649355	0.0211712	2.18752	3.41	3.83	3.16	3.53	4.35	4.82	5.46	3.64	3.62	6.05	4.85	4.33
ENSG00000261072.2	AC084783.1	-1.0055	-0.00791024	0.97937	0.986499	-0.009053	-1.07898	-0.109668	0.678394	0.763683	-0.168518	1.78	1.61	4.05	3.36	2.93	3.58	1.85	1.69	1.87	2.22	1.65	2.43
ENSG00000257511.1	AC084824.1	1.16891	0.225163	0.163689	0.245067	0.785981	-1.23157	-0.300501	0.117468	0.207391	-0.93008	1.9	2.53	2.58	2.3	3.43	2.73	2.11	2.58	2.08	1.4	1.92	1.38
ENSG00000274105.1	AC084824.3	1.18891	0.249642	0.398322	0.50095	0.399766	-1.24856	-0.320267	0.173682	0.279092	-0.760245	0.96	0.75	0.87	1.01	1.29	1.44	0.54	1.14	0.74	0.41	0.68	0.59
ENSG00000213144.2	AC084880.1	-1.75923	-0.814946	0.00196189	0.00665654	-2.70732	1.0994	0.136716	0.448003	0.564885	0.348719	2.71	3.41	2.81	3.2	1.29	1.88	1.77	1.68	2.27	3.11	3.43	3.07
ENSG00000263244.2	AC087190.3	1.18306	0.242528	0.0576013	0.105061	1.23957	1.47119	0.556981	2.93e-06	6.65e-05	5.53298	3.35	3.85	3.38	3.49	4.41	3.16	4.37	4.37	5.1	4.9	4.91	4.91
ENSG00000273691.1	AC087284.1	-1.38735	-0.472328	0.0655545	0.116958	-1.1834	-1.08662	-0.119853	0.601008	0.701198	-0.221119	0.53	0.68	0.99	1.18	0.66	0.66	0.42	0.47	0.77	0.57	0.53	0.67
ENSG00000132481.7	AC087289.1	-1.28288	-0.359384	0.000860427	0.00340033	-3.06529	-1.23008	-0.298756	0.000852894	0.00432039	-3.06911	11.67	12.97	11.06	13.03	7.76	9.39	10.51	8.93	10.67	9.19	10.22	8.26
ENSG00000235530.6	AC087294.1	1.2489	0.320656	0.366797	0.469387	0.435574	-1.40941	-0.495089	0.177888	0.283994	-0.749852	0.68	0.8	1.77	1.7	2.27	1.03	1.28	1.11	0.49	1.14	0.6	0.69
ENSG00000243181.2	AC087343.1	-1.09775	-0.13455	0.359075	0.461594	-0.444815	1.07171	0.0999107	0.511265	0.623325	0.291354	3.83	3.88	3.86	4.53	4.38	3.43	3.63	2.88	3.17	4.62	3.85	3.65
ENSG00000262003.1	AC087392.1	1.00959	0.0137747	0.950462	0.965367	0.0220654	-1.16771	-0.223683	0.382553	0.504227	-0.417308	4.65	3.14	2.68	2.62	3.58	3.14	2.76	3.18	2.79	2.7	1.76	2.69
ENSG00000262228.2	AC087392.3	1.32998	0.411404	0.269596	0.366655	0.569287	1.08805	0.12175	0.698022	0.780232	0.156131	0.2	0.37	0.64	0.58	0.67	0.87	0.31	0.45	0.51	0.37	0.34	0.32
ENSG00000270015.1	AC087481.3	-1.03466	-0.0491581	0.528712	0.624866	-0.276781	-1.06451	-0.0901925	0.274382	0.39473	-0.561645	3.81	4.45	4.35	4.32	4.12	3.89	3.78	3.53	3.87	3.42	3.47	3.55
ENSG00000259347.6	AC087482.1	-1.31428	-0.394268	0.172539	0.255818	-0.763113	-1.02287	-0.032624	0.881007	0.920914	-0.0550209	0.24	0.25	0.25	0.31	0.11	0.22	0.23	0.24	0.28	0.18	0.25	0.16
ENSG00000261879.6	AC087500.1	-1.09062	-0.125147	0.434285	0.535339	-0.362226	-1.00035	-0.00050682	0.998086	0.998648	-0.000832104	0.93	0.95	0.53	0.6	0.63	0.67	0.41	0.42	0.74	0.59	0.59	0.67
ENSG00000271851.1	AC087501.4	1.11582	0.158104	0.230083	0.322981	0.638116	1.2894	0.366696	0.0555881	0.114838	1.25502	0.69	0.7	0.74	0.87	0.73	0.88	0.81	0.84	1.03	0.62	0.89	0.92
ENSG00000272092.1	AC087623.2	1.57592	0.656195	0.0148449	0.0347037	1.82842	1.5662	0.64727	0.0107956	0.0315676	1.96675	0.47	0.32	0.45	0.51	0.89	0.69	0.59	0.48	0.57	0.48	0.56	0.6
ENSG00000259316.11	AC087632.1	-1.21528	-0.28129	0.170685	0.253633	-0.767804	-1.2271	-0.295248	0.0503078	0.10615	-1.29837	23.25	25.85	25.38	22.91	20.2	28.06	17.73	21.69	19.81	22.13	14.03	17.44
ENSG00000262580.5	AC087741.1	-1.40475	-0.49031	0.050532	0.0945635	-1.29643	-1.53783	-0.620891	0.0175361	0.0462462	-1.75607	0.94	1.31	1.43	2	1.13	1.15	0.59	1.14	0.87	0.55	0.75	1.09
ENSG00000279259.1	AC087741.3	-1.14311	-0.19296	0.41934	0.521549	-0.377434	1.10462	0.143555	0.493749	0.607454	0.306493	0.99	0.69	0.66	0.8	0.54	0.62	0.75	0.7	0.66	0.75	0.88	0.7
ENSG00000274598.1	AC087893.1	-1.04592	-0.0647748	0.876171	0.909947	-0.0574113	-1.24748	-0.31902	0.440702	0.558323	-0.355855	0.51	1	2.32	1.66	1.56	1.26	0.66	1.03	0.87	0.68	0.69	0.77
ENSG00000273270.1	AC090114.2	-1.23439	-0.303804	0.00315394	0.00972675	-2.50115	1.03221	0.0457304	0.570579	0.67507	0.243684	0.83	0.89	0.87	0.92	0.72	0.66	0.61	0.7	0.73	0.85	0.87	0.8
ENSG00000280828.1	AC090114.3	-1.34454	-0.427115	0.0917098	0.153539	-1.03758	-1.01541	-0.0220556	0.924131	0.951255	-0.0342666	1.33	1.24	2.26	2.73	1.61	1.31	1.17	1.08	1.95	1.45	1.35	1.41
ENSG00000167912.5	AC090152.1	2.61109	1.38465	0.000168963	0.00093852	3.77221	1.77201	0.82539	0.00454582	0.0160196	2.34239	0.81	0.73	0.48	0.71	1.6	1.54	1.6	2.01	0.95	0.94	1.13	1.04
ENSG00000269951.1	AC090181.2	1.07339	0.102178	0.576431	0.66908	0.239253	-1.07378	-0.102704	0.451241	0.567761	-0.345592	2.6	2.95	3.78	3.08	3.86	4.34	2.56	2.53	2.56	2.46	2.77	2.38
ENSG00000278991.1	AC090181.3	1.36806	0.452133	0.0687525	0.121527	1.16271	-1.14482	-0.195119	0.437192	0.555173	-0.359328	0.82	0.6	1.24	1.34	1.38	1.07	1.13	1.47	0.89	0.62	0.57	0.85
ENSG00000253106.1	AC090198.1	1.3598	0.443393	0.0061346	0.0167638	2.21221	1.0605	0.0847381	0.565728	0.671048	0.247392	0.83	0.83	1.01	0.76	1.18	1.28	1.03	1.08	0.7	0.96	0.76	0.82
ENSG00000266965.1	AC090220.1	1.01214	0.0174155	0.956061	0.969816	0.0195143	-1.09931	-0.136597	0.436034	0.554209	-0.36048	0.58	0.49	0.74	0.52	0.77	0.9	0.29	0.54	0.47	0.45	0.44	0.45
ENSG00000266997.2	AC090227.1	2.23627	1.16109	0.0240099	0.0513397	1.61961	-1.03961	-0.0560424	0.958207	0.97357	-0.0185407	0.29	1.29	0.64	0.31	1.43	0.77	1.5	1.1	0.9	0.8	1.27	0
ENSG00000267504.1	AC090236.2	1.81095	0.856744	0.0431041	0.0830732	1.36548	1.77214	0.825495	0.0739157	0.14376	1.13126	0.26	0.2	0.58	0.78	0.95	0.86	0.53	0.48	0.66	0.39	0.72	0.43
ENSG00000274776.1	AC090241.3	-1.0907	-0.125254	0.716882	0.787238	-0.144552	-2.02707	-1.0194	0.00617418	0.0203793	-2.20942	0.22	0.19	0.32	0.39	0.36	0.4	0.15	0.14	0.06	0.08	0.15	0.13
ENSG00000245975.2	AC090515.2	-1.22163	-0.288811	0.378595	0.480998	-0.421825	1.52833	0.611952	0.062334	0.125681	1.20528	0.37	0.48	0.58	0.23	0.32	0.4	0.28	0.25	0.57	0.54	0.48	0.5
ENSG00000274667.1	AC090517.2	-1.04767	-0.0671808	0.755946	0.818242	-0.121509	1.13868	0.187359	0.324444	0.446862	0.48886	0.76	1.07	1.06	1.05	1.14	0.91	0.64	1.05	1.12	0.88	0.93	0.85
ENSG00000285331.2	AC090517.5	-1.15308	-0.205497	0.0949699	0.158146	-1.02241	-1.151	-0.202882	0.120407	0.211529	-0.919347	1.94	2.01	2.63	2.11	1.95	2	1.72	1.69	1.86	1.8	1.45	1.76
ENSG00000250130.1	AC090519.1	-1.47638	-0.562066	0.102412	0.168152	-0.989651	1.2742	0.349589	0.136234	0.23239	0.865713	0.39	0.65	0.79	0.64	0.7	0.48	0.21	0.33	0.78	0.57	0.65	0.61
ENSG00000243403.1	AC090543.2	1.22986	0.298499	0.131109	0.205513	0.882369	1.1647	0.219954	0.206218	0.317436	0.685673	13.85	16.77	14.88	11.05	21.69	18.87	16.1	13.24	12.43	14.94	14.77	17.76
ENSG00000270072.1	AC090559.2	1.02307	0.0329073	0.859285	0.896898	0.0658629	-1.02287	-0.0326276	0.881363	0.921225	-0.0548454	2.67	3.35	3.4	4.23	2.88	4.29	3	3.37	3.28	3.32	1.87	3.34
ENSG00000270060.1	AC090589.3	-1.30227	-0.381026	0.123172	0.195441	-0.909487	-1.22734	-0.295531	0.181145	0.287417	-0.741973	1.11	1.34	1.12	1.33	0.96	1.11	0.51	0.92	0.73	0.84	0.91	0.63
ENSG00000259562.2	AC090607.2	1.21045	0.275548	0.123958	0.196456	0.906727	-1.08863	-0.122511	0.588699	0.690445	-0.230107	1.64	2.03	2.06	2.82	3.04	2.72	2.1	2.09	2.06	2.08	1.1	1.7
ENSG00000278867.1	AC090616.6	-1.2185	-0.285107	0.228583	0.321378	-0.640955	1.09335	0.128762	0.479131	0.593651	0.319546	0.32	0.31	0.49	0.58	0.26	0.44	0.28	0.32	0.36	0.39	0.35	0.43
ENSG00000239344.1	AC090686.1	1.22781	0.296082	0.167589	0.24981	0.775754	1.11114	0.152042	0.466268	0.581635	0.331364	0.77	1.22	1.18	1.45	1.64	1.7	1.06	1.15	0.89	0.96	1.1	1.37
ENSG00000254165.1	AC090739.1	1.62511	0.700535	0.0112284	0.027608	1.94968	1.28575	0.362607	0.0871435	0.163703	1.05976	2.47	2.79	5.03	4.51	7.47	6.29	4.15	4.92	4.23	3.39	4.48	4.03
ENSG00000249867.5	AC090833.1	1.38922	0.47427	0.0380346	0.074917	1.41982	1.59644	0.674858	0.00265061	0.0104948	2.57665	1	1.03	1	1.49	2.07	1.56	1.14	1.36	1.39	1.63	1.73	1.44
ENSG00000265936.1	AC091042.1	-1.01114	-0.0159813	0.916349	0.940167	-0.0379389	1.07313	0.101821	0.5411	0.649938	0.266722	75.98	85.21	72.53	81.08	95.44	78.92	77.71	66.85	94.96	68.44	97.48	68.73
ENSG00000187951.11	AC091057.1	1.04653	0.065607	0.677476	0.756423	0.169106	1.04205	0.05942	0.648426	0.74037	0.18814	2.24	2.44	3.17	3.63	3.3	3.2	2.44	2.45	2.85	2.63	2.51	2.95
ENSG00000247728.2	AC091057.2	-1.19522	-0.257282	0.122007	0.193877	-0.913616	-1.29102	-0.368506	0.03894	0.0868397	-1.4096	1.98	1.85	2.46	1.76	1.74	1.78	1.62	1.29	1.44	1.51	1.14	1.39
ENSG00000285077.2	AC091057.6	1.06036	0.08456	0.564568	0.658425	0.248284	1.00472	0.00678681	0.939409	0.96172	0.0271454	13.98	14.02	18.74	17.68	18.96	20.62	12.35	15.17	17.37	14.84	16.56	15.05
ENSG00000278986.1	AC091060.1	1.5105	0.595028	0.076552	0.13259	1.11604	1.1423	0.191942	0.553795	0.660819	0.256651	0.38	0.59	0.24	0.4	0.77	0.49	0.6	0.44	0.42	0.44	0.28	0.37
ENSG00000266918.1	AC091132.3	1.05658	0.0793978	0.801493	0.853298	0.0961002	-1.23375	-0.303051	0.309227	0.43159	-0.509722	0.42	0.6	1.1	1.27	0.97	1.12	0.62	0.55	0.69	0.5	0.51	0.49
ENSG00000267246.1	AC091132.5	-2.93347	-1.55261	0.00177299	0.00614305	-2.75129	-1.65432	-0.726239	0.032169	0.0746549	-1.49256	0.64	0.6	0.88	0.98	0.37	0.09	0.4	0.08	0.71	0.26	0.24	0.33
ENSG00000254061.1	AC091144.2	1.05932	0.0831359	0.75305	0.816107	0.123176	-1.05413	-0.0760589	0.784831	0.849017	-0.105224	1.32	2.03	2.09	3.11	3.2	2.06	1.68	1.78	2.12	1.53	1.75	1.17
ENSG00000267160.1	AC091152.2	1.11304	0.154509	0.433139	0.53432	0.363373	-1.0512	-0.0720367	0.714627	0.792611	-0.14592	0.32	0.48	0.66	0.53	0.49	0.6	0.43	0.57	0.37	0.43	0.32	0.47
ENSG00000279879.1	AC091152.4	-1.31164	-0.391376	0.146216	0.223675	-0.835006	-1.19445	-0.256344	0.323034	0.445471	-0.490752	0.18	0.19	0.22	0.18	0.14	0.16	0.19	0.08	0.09	0.11	0.2	0.15
ENSG00000213939.4	AC091153.1	1.55761	0.639336	0.283923	0.382509	0.546799	2.02254	1.01617	0.135079	0.230975	0.869411	3.77	4.26	4.87	0.54	4.72	4.15	4.43	3.17	3.19	6.52	4.22	4.98
ENSG00000279555.1	AC091181.1	1.05818	0.0815891	0.690053	0.76616	0.161118	1.0198	0.0282855	0.888689	0.926401	0.05125	0.92	1.19	1.79	1.83	1.9	1.48	1.1	1.27	1.56	1.13	1.02	1.29
ENSG00000253746.1	AC091182.2	1.19606	0.25829	0.0878036	0.148225	1.05649	1.42037	0.506269	0.00148195	0.00662362	2.82917	4.75	4.46	5.4	4.32	5.14	5.14	5.97	5.93	6.27	6.37	5.32	6.11
ENSG00000285581.1	AC091196.1	-1.32448	-0.405425	0.0356059	0.0709881	-1.44848	-1.25493	-0.327607	0.122447	0.214243	-0.912051	0.38	0.5	0.55	0.5	0.38	0.44	0.28	0.3	0.33	0.41	0.23	0.37
ENSG00000239969.5	AC091390.4	-1.16623	-0.221857	0.195624	0.283203	-0.708578	1.02761	0.0392872	0.799795	0.86049	0.0970213	5.52	6.55	7.43	9.96	7.37	6.3	5.48	4.55	7.21	7.57	5.15	6.01
ENSG00000229043.2	AC091729.3	-1.37136	-0.455611	0.00475076	0.013535	-2.32324	-1.12545	-0.170496	0.180698	0.286872	-0.743046	1.81	2.06	1.99	1.92	1.17	1.34	1.4	1.31	1.38	1.31	1.89	1.47
ENSG00000275740.1	AC091959.3	1.17715	0.235293	0.0469957	0.0890887	1.32794	1.07486	0.104151	0.274667	0.395042	0.561194	6.95	7.28	6.58	6.03	7.91	7.34	6.56	8.76	7.72	6.56	6.37	6.77
ENSG00000275765.5	AC091982.3	-1.20814	-0.272782	0.394692	0.497312	-0.403742	-1.47993	-0.565533	0.0630967	0.126812	-1.19999	1.59	1.72	1.24	1.08	0.83	0.89	1.26	1.57	0.72	0.6	0.8	1.12
ENSG00000234004.4	AC092017.2	1.02175	0.0310442	0.782576	0.839316	0.106473	-1.08739	-0.120874	0.278959	0.399562	-0.55446	11.73	10.84	11.99	13.06	12.69	13.96	10.7	11	9.99	10.78	9.42	9.16
ENSG00000273291.5	AC092042.3	1.941	0.956799	0.0062568	0.0170344	2.20365	1.7403	0.799336	0.0379602	0.0850939	1.42067	1.13	0.72	0.43	0.91	1.43	1.19	1.31	1.4	1.65	1.06	1.03	0.89
ENSG00000239557.1	AC092045.1	1.25085	0.322912	0.150059	0.228411	0.823738	1.00569	0.00818552	0.972031	0.982438	0.0123199	0.41	0.76	0.9	0.8	0.83	0.95	0.79	0.76	0.68	0.47	0.61	0.65
ENSG00000178386.13	AC092072.1	1.75949	0.815159	0.000153946	0.000873047	3.81263	1.84855	0.886391	2.8e-05	0.00033115	4.55341	2.29	2.24	2.87	2.04	3.89	3.79	3.61	4.35	4.14	3.62	3.83	4.01
ENSG00000260290.2	AC092115.1	-1.02189	-0.0312458	0.715569	0.786116	-0.145348	-1.14863	-0.199918	0.0967493	0.17792	-1.01435	2.41	2.49	2.66	2.85	2.68	2.38	2.26	2.44	2.14	2	2.25	1.72
ENSG00000276791.1	AC092117.1	-1.14767	-0.198713	0.396489	0.49911	-0.401769	-1.20316	-0.26683	0.118538	0.208865	-0.926143	0.82	0.8	0.62	0.8	0.51	0.53	0.88	0.62	0.5	0.55	0.62	0.52
ENSG00000279901.1	AC092117.2	1.08453	0.117074	0.47379	0.573715	0.324414	1.19205	0.25344	0.205831	0.317114	0.68649	0.76	0.63	1	0.97	1.08	0.86	0.73	0.83	0.88	0.85	1.09	0.68
ENSG00000274460.1	AC092119.2	-1.24505	-0.316203	0.245588	0.340233	-0.609794	-1.31427	-0.394264	0.113988	0.202589	-0.943141	0.72	0.55	0.99	0.57	0.39	0.56	0.58	0.63	0.53	0.42	0.49	0.38
ENSG00000260417.1	AC092127.1	-2.81514	-1.49321	0.000770624	0.00311812	-3.11316	-1.42111	-0.507021	0.0578658	0.118382	-1.23758	0.33	0.45	0.59	0.88	0.17	0.28	0.13	0.17	0.35	0.28	0.3	0.36
ENSG00000279294.1	AC092135.1	-1.81506	-0.860018	0.147146	0.224759	-0.832251	-1.48871	-0.574066	0.244678	0.361936	-0.611405	0.27	0.24	0.73	1.29	0.45	0.42	0.13	0.16	0.34	0.26	0.22	0.29
ENSG00000279841.1	AC092135.3	-1.76748	-0.821695	0.0510102	0.0953262	-1.29234	-1.05463	-0.0767387	0.8079	0.866877	-0.0926423	1.01	1.14	2.61	3.27	1.27	1.27	0.66	0.8	1.63	1.43	1.39	1.45
ENSG00000272923.1	AC092139.1	1.00109	0.00157139	0.996974	0.997837	0.00131617	1.51127	0.595758	0.0973353	0.178487	1.01173	2.98	3.89	3	1.23	1.47	2.95	3.15	2.96	3.29	4.04	2.78	4.08
ENSG00000279476.1	AC092139.3	-2.62445	-1.39201	0.00190016	0.00647285	-2.72121	-1.17381	-0.231196	0.283394	0.404213	-0.54761	1.92	2.38	3.73	4.01	1.58	1.7	0.65	0.71	2.53	2.01	1.98	2.4
ENSG00000198211.8	AC092143.1	5.68114	2.50618	0.191055	0.277881	0.718841	6.11521	2.6124	0.0692906	0.13665	1.15933	0	0.4	0.04	0	0.24	0	0.3	0.5	0.09	0.01	0.24	0.21
ENSG00000234432.4	AC092171.3	-1.31937	-0.399853	0.0117997	0.028768	-1.92813	-1.39355	-0.478762	0.00251467	0.0100788	-2.59952	1.1	0.94	1.06	1.36	0.94	0.81	0.82	0.66	0.68	0.75	0.66	0.69
ENSG00000273084.1	AC092171.5	-1.59124	-0.670154	0.00326693	0.0100142	-2.48586	-1.66471	-0.735273	0.00350575	0.0130624	-2.45522	2.37	2.74	3.34	4.53	2.1	1.87	2.06	1.59	1.24	1.94	1.65	1.88
ENSG00000282416.1	AC092299.1	1.2707	0.34562	0.199458	0.287854	0.700148	-1.15208	-0.204244	0.56565	0.67101	-0.247452	1.28	0.86	0.98	1.58	1.06	1.36	1.67	1.6	0.41	1.61	0.74	0.96
ENSG00000284428.1	AC092329.4	-1.27331	-0.348579	0.0182305	0.041013	-1.7392	-1.07628	-0.10606	0.330835	0.453167	-0.480388	18.59	19.17	23.25	24.36	16.87	15.97	13.76	15.55	19.98	18.99	16.63	19.02
ENSG00000140743.8	AC092338.1	1.14191	0.191443	0.00281721	0.00888978	2.55018	-1.00094	-0.00135212	0.978234	0.986338	-0.00955722	13.19	13.15	13.16	15.31	15.58	13.61	14.52	16.6	12.64	13.5	12.12	13.39
ENSG00000261512.2	AC092368.3	-1.076	-0.105672	0.513751	0.610774	-0.289248	1.22271	0.290083	0.0405838	0.0896349	1.39165	3.47	3	2.83	3.07	3.01	2.52	3.39	2.14	3.12	3.09	3.77	3.7
ENSG00000224593.1	AC092427.1	-1.22798	-0.296288	0.477954	0.577719	-0.320614	1.1589	0.212762	0.455507	0.571645	0.341505	1.48	1.91	3.08	4.14	3.4	2.28	0.78	2.2	2.73	2	2	3.39
ENSG00000227189.2	AC092535.1	-1.07796	-0.108308	0.766337	0.826909	-0.11558	-1.54273	-0.625483	0.0663467	0.131984	-1.17818	1.1	1.49	2.55	3.57	2.43	2.62	1.32	1.11	1.14	0.95	1.13	1.27
ENSG00000251639.2	AC092535.2	-1.08855	-0.122405	0.668967	0.749412	-0.174595	-1.09249	-0.127618	0.639854	0.73278	-0.193919	0.76	0.73	1.56	1.8	1.24	1.27	0.76	0.8	0.84	0.99	0.7	1.03
ENSG00000251652.1	AC092535.3	-1.04954	-0.0697503	0.867855	0.903629	-0.0615529	-1.65697	-0.728548	0.0838517	0.158655	-1.07649	1.65	2.62	5.32	6.1	5.73	3.83	1.58	2.44	2.14	1.27	1.34	2.51
ENSG00000242262.1	AC092597.1	-1.0913	-0.126048	0.362454	0.465163	-0.440747	-1.09463	-0.130447	0.307446	0.429667	-0.512231	5.22	5.65	7.09	6.57	6.73	4.64	5.66	4.84	4.45	5.7	4.3	5.41
ENSG00000251455.1	AC092611.1	1.53712	0.620227	0.011182	0.027508	1.95148	-1.51023	-0.594767	0.060263	0.1223	-1.21995	0.32	0.21	0.3	0.41	0.58	0.48	0.38	0.39	0.15	0.28	0.11	0.17
ENSG00000227542.1	AC092614.1	-1.97134	-0.979177	0.00974976	0.0245656	-2.01101	1.25502	0.327709	0.071961	0.140771	1.1429	0.78	0.73	0.97	1.24	0.45	0.21	0.57	0.53	0.99	0.94	0.98	1.02
ENSG00000249773.3	AC092647.5	1.18663	0.246866	0.186377	0.272373	0.729609	-1.07075	-0.0986271	0.49165	0.60555	-0.308344	0.93	1.27	1.61	1.34	1.26	1.35	1.53	1.72	1.06	1.14	0.97	1.05
ENSG00000273245.1	AC092653.1	-1.21407	-0.279856	0.285805	0.384246	-0.54393	-1.15024	-0.201937	0.417817	0.53813	-0.379014	1.49	2.53	3.19	3.75	2.23	2.61	1.84	1.67	1.76	1.81	1.99	2.21
ENSG00000280037.1	AC092653.2	-1.31239	-0.3922	0.141595	0.218509	-0.848953	-1.01021	-0.0146487	0.942535	0.963503	-0.0257026	2.07	3.16	3.98	2.66	2.8	2.85	1.72	1.51	2.79	2.4	2.1	2.82
ENSG00000230606.10	AC092683.1	1.74918	0.806677	0.00109531	0.00413095	2.96046	-1.22605	-0.294015	0.138544	0.235401	-0.858412	7.81	7.63	12.7	12.79	17.64	15.18	12.85	13.54	8.68	8.45	5.89	7.45
ENSG00000260643.2	AC092718.3	-1.85988	-0.89521	0.00398111	0.0117367	-2.4	1.13379	0.181151	0.505244	0.617584	0.296499	0.86	1.18	1.54	1.28	0.42	0.53	0.82	0.78	0.53	1.64	1.16	1.35
ENSG00000261061.1	AC092718.4	1.01814	0.0259343	0.790778	0.845586	0.101945	1.30927	0.388764	0.00173332	0.00751201	2.76112	34.11	32.62	27.42	27.47	28.33	27.96	30.91	29.92	39.58	34.68	38.8	37.5
ENSG00000278985.1	AC092718.7	-1.407	-0.492618	0.0379642	0.0748057	-1.42063	1.05957	0.0834807	0.638301	0.731829	0.194975	0.75	0.92	1.24	1.02	1.02	0.57	0.5	0.67	1.04	0.77	0.73	1.12
ENSG00000260750.5	AC092720.1	-1.63	-0.704869	0.00961324	0.0242972	-2.01713	-1.17297	-0.230168	0.316429	0.438998	-0.499724	1.14	1.77	1.72	1.55	0.82	1.05	0.84	0.69	1.05	1.24	0.75	1.28
ENSG00000275764.1	AC092747.4	-1.378	-0.46258	0.0237005	0.0508056	-1.62524	-1.55194	-0.634073	0.00218041	0.00898561	-2.66146	2.53	2.25	3.51	3.69	2.76	2.02	1.58	1.88	1.79	1.5	1.49	1.94
ENSG00000260805.2	AC092803.2	1.3659	0.449851	0.0362678	0.0720683	1.44048	-1.10385	-0.142538	0.567249	0.672258	-0.246226	0.51	0.45	0.52	0.44	0.56	0.58	0.74	0.62	0.53	0.27	0.44	0.31
ENSG00000282057.1	AC092807.3	1.48026	0.56585	0.00156172	0.00554272	2.8064	1.27962	0.35572	0.0212057	0.0537266	1.67355	1.28	1.2	0.93	1.33	1.77	2.1	1.27	2.07	1.8	1.13	1.63	1.43
ENSG00000214776.12	AC092821.1	-1.85345	-0.890211	0.000140828	0.000812887	-3.85131	-2.19642	-1.13515	1.37e-05	0.000197223	-4.86271	1.13	1.2	1.63	1.31	0.87	0.72	0.51	0.59	0.52	0.46	0.43	0.48
ENSG00000284634.1	AC092821.3	-2.0939	-1.06619	3.75e-05	0.000296711	-4.42603	-2.03261	-1.02333	5.65e-05	0.000561243	-4.24766	2.1	2.11	1.68	1.4	1.1	0.73	0.85	0.66	0.66	0.97	0.79	0.76
ENSG00000253284.2	AC092828.1	1.23628	0.306001	0.161565	0.242505	0.791652	-1.45792	-0.543912	0.00713651	0.0227844	-2.14651	2.04	2.44	3.63	3.13	4.42	3.65	2.51	2.7	1.87	1.65	1.53	1.95
ENSG00000243830.2	AC092865.1	1.24375	0.314697	0.0753021	0.130728	1.12319	1.12539	0.170426	0.358491	0.480391	0.445522	4.02	5.68	4.61	4.04	6.02	6.16	5.8	4.4	3.61	5.76	4.44	4.84
ENSG00000284624.1	AC092902.4	1.67417	0.743447	0.10204	0.167694	0.991231	1.13153	0.17828	0.668773	0.756473	0.174721	0.09	0.11	0.21	0.44	0.51	0.46	0.14	0.24	0.12	0.18	0.07	0.29
ENSG00000242622.1	AC092910.3	1.00477	0.00686169	0.965632	0.976732	0.0151885	1.06279	0.0878544	0.587758	0.689613	0.230801	1.75	2.05	2.75	2.99	2.22	1.95	2	2.49	2.43	2.28	2.2	1.95
ENSG00000279673.1	AC092919.2	-1.57776	-0.657873	0.0473635	0.0897021	-1.32456	1.00922	0.0132404	0.952044	0.969874	0.021343	0.84	0.64	0.63	0.56	0.25	0.5	0.4	0.5	0.49	0.56	0.71	0.58
ENSG00000225568.1	AC093155.1	-1.15434	-0.207064	0.237813	0.331476	-0.623765	1.06062	0.08491	0.653167	0.744031	0.184976	0.96	1.2	1.01	1.06	0.93	0.89	0.84	0.85	0.95	1.11	0.75	1.11
ENSG00000233184.6	AC093157.1	1.41554	0.501349	0.0589892	0.107121	1.22923	1.32309	0.403912	0.0525829	0.110095	1.27916	0.54	0.67	0.85	0.65	0.92	0.71	1.14	0.99	1.08	0.69	0.81	0.53
ENSG00000267152.1	AC093227.1	2.30892	1.20722	0.00570949	0.0157886	2.2434	2.62964	1.39486	0.00393509	0.0143088	2.40505	0.25	0.25	0.4	0.11	0.66	0.46	0.43	0.56	0.4	0.46	0.52	0.54
ENSG00000243160.1	AC093270.2	1.16222	0.216888	0.174112	0.257566	0.75917	1.14234	0.191992	0.217277	0.330797	0.662986	3.45	4.94	3.94	4.2	4.41	4.2	5.38	4.41	3.46	4.83	4.26	4.3
ENSG00000272335.1	AC093297.2	1.2051	0.269148	0.00887044	0.0227033	2.05205	1.02358	0.0336235	0.710425	0.789134	0.148482	4.89	4.68	5.29	5.5	6.29	6.45	5.03	5.43	5.53	4.37	4.28	5.16
ENSG00000170846.17	AC093323.1	-1.12534	-0.170366	0.052982	0.09824	-1.27587	-1.20523	-0.26931	0.00183937	0.00786505	-2.73533	14.04	14.57	12.45	14.53	11.74	11.07	12.65	12.84	11.23	11.21	11.07	10.65
ENSG00000279811.1	AC093330.2	1.17933	0.237962	0.293601	0.392608	0.532242	-1.08768	-0.121255	0.57996	0.683774	-0.236602	0.15	0.15	0.26	0.29	0.29	0.27	0.17	0.2	0.14	0.19	0.13	0.18
ENSG00000272979.1	AC093388.1	-1.43887	-0.524938	0.155736	0.235371	-0.80761	-1.63061	-0.705413	0.0382514	0.0855667	-1.41735	1.45	1.95	3.52	3.14	1.92	2.45	1.6	0.79	1.47	1.44	0.94	0.97
ENSG00000285043.1	AC093512.2	-1.36978	-0.453946	0.0267437	0.0561014	-1.57278	-1.07993	-0.11094	0.442715	0.559764	-0.353876	7	5.62	5.4	4.95	3.01	3.91	4.37	3.88	4.25	4.36	4.87	4.58
ENSG00000280402.1	AC093525.10	1.18583	0.245898	0.232332	0.325603	0.633891	1.19838	0.261088	0.400468	0.521989	0.397432	0.35	0.36	0.5	0.58	0.61	0.59	0.36	0.5	0.24	0.65	0.59	0.45
ENSG00000261613.2	AC093525.6	-1.23701	-0.306853	0.293157	0.392111	-0.5329	-2.11589	-1.08126	0.0016672	0.00728265	-2.77801	0.85	0.64	1.19	1.58	1.19	0.98	0.56	0.6	0.49	0.42	0.35	0.39
ENSG00000269937.1	AC093525.7	-1.20918	-0.274029	0.140695	0.217552	-0.851722	-1.77962	-0.831571	0.0011632	0.00547274	-2.93435	1.33	1.41	1.54	2.48	1.51	1.48	1.09	1.15	0.75	0.94	0.91	0.72
ENSG00000279520.1	AC093525.8	1.057	0.0799757	0.637356	0.723561	0.195618	1.19762	0.260172	0.152896	0.253379	0.815605	0.65	0.71	0.61	0.97	0.78	0.84	0.67	0.66	0.67	0.71	0.79	0.84
ENSG00000279118.1	AC093535.2	-1.20136	-0.264669	0.289421	0.38814	-0.53847	-1.11215	-0.153352	0.509675	0.621907	-0.292707	0.35	0.26	0.5	0.47	0.46	0.32	0.22	0.27	0.36	0.34	0.21	0.28
ENSG00000261668.1	AC093591.2	-1.0939	-0.12948	0.615564	0.704851	-0.210727	-1.41188	-0.497613	0.100738	0.183228	-0.996805	0.18	0.23	0.32	0.39	0.35	0.31	0.18	0.17	0.22	0.16	0.09	0.21
ENSG00000240859.2	AC093627.4	1.23025	0.298952	0.119837	0.191028	0.921411	-1.19448	-0.256382	0.171854	0.276683	-0.76484	1.47	1.66	1.61	1.26	1.42	1.71	2.06	1.78	1.01	1.3	0.95	1.02
ENSG00000242474.2	AC093627.5	-1.0726	-0.101112	0.51071	0.608187	-0.291825	-1.41778	-0.503631	0.0380833	0.0852621	-1.41927	3.73	3.18	3.07	4.42	3.32	3.63	3.52	2.61	1.52	3.18	2.21	2.27
ENSG00000284981.1	AC093668.3	-1.1258	-0.170955	0.45393	0.554602	-0.343011	-1.19712	-0.259571	0.222968	0.337807	-0.651757	4.3	5.83	6.4	9.9	7.01	6.27	4.32	4.35	5.6	4.52	4.08	4.97
ENSG00000232533.1	AC093673.1	-1.21597	-0.282111	0.117298	0.187683	-0.930711	1.10025	0.137832	0.409648	0.530238	0.387589	4.43	4.7	4.16	3.56	3.22	3.06	3.43	3.73	3.89	4.82	3.41	4.61
ENSG00000272760.1	AC093726.1	1.55142	0.633591	0.454276	0.554908	0.34268	1.93023	0.948772	0.244867	0.362047	0.611071	0.83	0.46	1.27	0.05	0.57	0.55	0.65	0.7	0.44	0.7	0.79	0.85
ENSG00000245958.6	AC093752.1	-1.00207	-0.00298387	0.971632	0.981268	-0.0124983	-1.60092	-0.678902	4.08e-05	0.000440448	-4.38887	7.34	8.08	8.01	9.45	7.55	8.44	7.42	7.46	4.66	4.53	4.91	5.65
ENSG00000250950.1	AC093752.2	-1.00068	-0.000985181	0.997552	0.998168	-0.00106465	-1.0018	-0.00258942	0.986262	0.990598	-0.00600768	1.84	1.74	1.92	2.1	2.93	2.31	0.83	2.1	1.81	1.69	1.46	1.61
ENSG00000273449.1	AC093788.1	1.41407	0.499856	0.00770827	0.0202868	2.11304	-1.13145	-0.178174	0.208501	0.320056	-0.680892	1.59	1.54	1.86	1.75	2.95	2.36	1.8	2.32	1.38	1.21	1.13	1.49
ENSG00000284968.1	AC093827.4	1.15621	0.209399	0.237636	0.331292	0.624088	1.84062	0.880188	8.3e-05	0.000735741	4.0808	0.83	0.9	0.97	1.09	1.09	1.12	0.99	0.87	1.67	1.18	1.29	1.15
ENSG00000285458.1	AC093827.5	-1.51261	-0.597038	0.0169519	0.038663	-1.77078	-1.18885	-0.249562	0.424775	0.544354	-0.371841	0.62	0.63	0.62	0.81	0.58	0.44	0.58	0.4	0.48	0.4	0.87	0.74
ENSG00000225356.3	AC093840.1	-1.65561	-0.727361	0.00732882	0.0194399	-2.13497	-1.36187	-0.445593	0.0660258	0.131411	-1.18029	8.28	12.44	12.2	7.71	7.21	6.65	4.98	5.25	5.64	7.06	8	5.7
ENSG00000242136.1	AC093904.2	-1.8179	-0.862276	0.0282268	0.0586223	-1.54934	-2.61273	-1.38556	0.00226638	0.00926246	-2.64467	1.35	1.84	2.54	2.09	1.03	1.08	0.47	1.87	0.54	0.15	0.74	0.99
ENSG00000261104.1	AC093904.4	-2.21605	-1.14799	4.62e-07	1.38e-05	-6.33513	-4.74146	-2.24533	9.62e-09	1.51e-06	-8.01661	1.74	1.76	1.73	2.03	0.95	0.76	0.7	0.76	0.29	0.29	0.39	0.37
ENSG00000280219.1	AC093908.1	1.49007	0.575379	0.00117736	0.00437858	2.92909	1.0943	0.130008	0.371146	0.493298	0.430455	0.75	0.75	0.85	1.05	1.39	1.36	0.96	1.09	0.84	0.96	0.63	0.95
ENSG00000180015.12	AC093909.1	-1.16276	-0.217557	0.471803	0.571906	-0.32624	1.31655	0.396758	0.180848	0.287043	0.742687	0.56	0.66	0.6	0.33	0.42	0.41	0.45	0.39	0.54	0.54	0.58	0.69
ENSG00000278974.1	AC093909.6	1.17178	0.228698	0.332649	0.435015	0.478014	-1.26814	-0.342712	0.217087	0.330539	-0.663367	0.96	0.56	0.87	1.05	1.03	0.97	1.16	0.7	0.56	0.34	0.72	0.54
ENSG00000260296.1	AC095057.3	-1.44297	-0.529038	0.110199	0.178423	-0.957824	-2.11756	-1.0824	0.0051301	0.01765	-2.28987	0.39	0.57	1	0.77	0.59	0.47	0.5	0.22	0.34	0.14	0.26	0.22
ENSG00000272936.1	AC096586.1	-1.26326	-0.337146	0.062778	0.112787	-1.20219	-1.20231	-0.265815	0.175446	0.281136	-0.755856	3.24	4.03	4.64	3.3	3.08	3.45	2.47	2.7	2.87	2.53	2.24	3.65
ENSG00000234488.1	AC096664.2	-1.19342	-0.255097	0.455966	0.556501	-0.341068	1.01568	0.0224419	0.913063	0.943879	0.0394992	1.86	2.53	2.99	2.18	3.23	0.87	2.09	2.23	2.58	1.71	1.85	2.35
ENSG00000279464.1	AC096720.2	-1.0051	-0.00734344	0.97645	0.984169	-0.0103502	-1.03031	-0.0430775	0.874292	0.91653	-0.0583437	0.26	0.34	0.52	0.47	0.57	0.27	0.36	0.31	0.32	0.28	0.22	0.52
ENSG00000261468.1	AC096921.2	1.39878	0.484168	0.0338737	0.0681811	1.47014	-1.03338	-0.0473774	0.805414	0.865225	-0.0939806	0.28	0.34	0.49	0.47	0.63	0.52	0.39	0.57	0.37	0.28	0.28	0.35
ENSG00000273486.1	AC096992.2	-1.03795	-0.0537367	0.836488	0.879853	-0.0775403	-1.17655	-0.234558	0.397599	0.519278	-0.400555	0.3	0.28	0.71	0.54	0.44	0.46	0.31	0.36	0.35	0.27	0.31	0.28
ENSG00000248932.5	AC097103.2	-1.16752	-0.223452	0.355476	0.458132	-0.44919	-1.18729	-0.247678	0.369945	0.492029	-0.431863	1.21	1.35	1.03	1.44	1.31	1.04	1.04	0.83	0.71	1.15	0.63	1.15
ENSG00000228519.3	AC097263.1	-1.56565	-0.646762	0.065616	0.117042	-1.18299	-1.17024	-0.226802	0.390301	0.511907	-0.408601	2.31	2.61	1.59	1.88	1.2	1.22	2.09	0.72	1.25	1.69	1.21	2.22
ENSG00000270194.1	AC097359.2	-1.50878	-0.593384	0.000915683	0.00357421	-3.03825	1.01548	0.0221651	0.875263	0.917188	0.0578613	0.76	0.86	0.82	0.81	0.52	0.53	0.5	0.52	0.74	0.78	0.81	0.61
ENSG00000273247.5	AC097376.2	1.21385	0.279585	0.0685928	0.121283	1.16372	-1.28044	-0.356635	0.0422829	0.0925145	-1.37383	1.54	2.13	2.48	2.5	3.05	3	2.2	2.27	1.77	1.43	1.53	1.41
ENSG00000250657.1	AC097451.1	1.25519	0.32791	0.299765	0.399563	0.52322	-2.22951	-1.15673	0.0100442	0.0297843	-1.99809	1.65	2.47	1.01	1.71	2.45	1.71	2.18	1.27	0.56	0.24	0.4	0.8
ENSG00000250403.1	AC097460.2	-1.55526	-0.637158	0.0176993	0.0400125	-1.75204	-1.14109	-0.190415	0.492529	0.606306	-0.307569	0.62	0.89	0.87	1.15	0.51	0.71	0.38	0.44	0.32	0.82	0.72	0.65
ENSG00000272644.1	AC097468.3	-1.42713	-0.51312	0.129072	0.20311	-0.88917	1.03645	0.0516494	0.841527	0.892302	0.0749318	2.11	1.96	2.13	1.54	0.87	1	1.45	2.03	1.84	2.41	1.51	1.27
ENSG00000251095.6	AC097478.1	1.35811	0.441604	0.00464263	0.0132737	2.33324	2.05889	1.04187	4.89e-07	2.08e-05	6.31084	1.29	1.28	1.33	1.44	1.5	1.93	1.87	1.88	2.57	2.43	2.51	2.44
ENSG00000272870.2	AC097534.2	-1.38695	-0.471912	0.0291901	0.0603065	-1.53477	-1.36455	-0.448426	0.0766945	0.147842	-1.11524	1.26	1.26	1.57	0.98	0.75	1.05	0.81	0.84	1.08	0.71	0.51	0.87
ENSG00000285602.1	AC097625.2	1.87919	0.91011	0.00540402	0.0150726	2.26728	1.40535	0.490931	0.250762	0.369025	0.600738	0.11	0.09	0.2	0.19	0.31	0.34	0.2	0.2	0.24	0.08	0.27	0.13
ENSG00000270562.1	AC097634.1	-3.05833	-1.61274	0.000523754	0.00229006	-3.28087	-1.2478	-0.319388	0.280897	0.401583	-0.551452	0.16	0.15	0.31	0.33	0.07	0.08	0.07	0.02	0.21	0.16	0.11	0.13
ENSG00000277728.1	AC097641.2	-1.20044	-0.263562	0.493465	0.59218	-0.306743	1.04901	0.0690239	0.869033	0.912813	0.0609637	0.88	0.67	2.48	1.71	1.16	1.08	0.7	0.89	1.09	0.58	1.1	1.04
ENSG00000228981.3	AC097658.1	-1.14576	-0.19631	0.450838	0.551573	-0.345979	1.06847	0.0955478	0.667696	0.755736	0.175421	1.84	2.63	1.57	1.6	1.47	1.24	1.73	1.89	1.53	1.69	1.83	2.1
ENSG00000232732.10	AC097717.1	-1.3657	-0.449641	0.135904	0.211417	-0.866767	-1.10959	-0.150029	0.679418	0.764459	-0.167863	1.42	0.68	1.29	1.16	1.15	0.5	0.7	0.56	0.45	1.6	0.45	1.28
ENSG00000232915.1	AC097721.1	-2.00758	-1.00546	0.0130446	0.0311925	-1.88457	-1.25265	-0.324988	0.180081	0.28606	-0.744532	0.6	0.95	0.91	1.31	0.2	0.59	0.52	0.46	0.67	0.51	0.52	0.81
ENSG00000283580.3	AC098484.3	-1.03361	-0.0476901	0.869472	0.904615	-0.0607443	-1.33139	-0.412929	0.15059	0.250467	-0.822204	1.37	1.7	1.84	3.24	1.24	1.74	2.3	2.23	1.19	0.78	1.28	1.87
ENSG00000285728.1	AC098484.4	1.00417	0.00600214	0.97457	0.983097	0.0111871	-1.07996	-0.110973	0.57155	0.675853	-0.242946	0.3	0.39	0.38	0.3	0.32	0.34	0.37	0.29	0.27	0.32	0.25	0.24
ENSG00000285713.1	AC098588.1	1.07331	0.102067	0.635717	0.722005	0.196736	-1.05417	-0.0761046	0.736442	0.810375	-0.132861	0.53	0.38	0.5	0.53	0.4	0.61	0.57	0.41	0.48	0.38	0.26	0.48
ENSG00000271943.2	AC098614.3	1.18805	0.24859	0.0511557	0.0955209	1.29111	1.59556	0.674064	6.08e-05	0.000588911	4.21637	7.16	8.94	7.84	6.97	9.28	9.69	8.73	7.73	11.14	11.97	10.44	10.96
ENSG00000283563.1	AC098650.1	1.49266	0.577884	0.00146437	0.0052548	2.83435	1.36586	0.449807	0.0154135	0.0417572	1.8121	0.31	0.44	0.49	0.45	0.68	0.64	0.54	0.58	0.61	0.53	0.43	0.49
ENSG00000251429.1	AC098679.2	-1.06489	-0.0907093	0.732808	0.799774	-0.13501	1.07552	0.105028	0.700505	0.78198	0.154589	0.52	0.75	0.68	1.18	0.73	0.91	0.66	0.45	0.8	0.82	0.52	0.49
ENSG00000232202.1	AC098824.1	-1.06606	-0.0922854	0.75156	0.815146	-0.124036	-1.18159	-0.240731	0.376006	0.497895	-0.424806	0.47	0.48	0.82	0.77	1.07	0.49	0.46	0.38	0.45	0.67	0.32	0.3
ENSG00000248795.1	AC098859.1	-2.21294	-1.14596	0.000684289	0.00283794	-3.16476	1.01661	0.0237697	0.911371	0.94269	0.0403047	0.43	0.38	0.48	0.5	0.14	0.14	0.21	0.21	0.39	0.36	0.27	0.5
ENSG00000214796.8	AC098934.1	-2.20175	-1.13865	0.000533135	0.00232543	-3.27316	-2.36104	-1.23942	0.000206567	0.00146558	-3.68494	1.82	2.23	1.26	1.73	0.78	0.54	0.93	0.8	0.86	0.91	0.47	0.79
ENSG00000234996.4	AC098934.2	-1.60254	-0.680358	0.075085	0.130398	-1.12445	-1.3527	-0.435839	0.226943	0.342273	-0.644083	0.31	0.43	0.23	0.39	0.17	0.14	0.33	0.19	0.09	0.32	0.11	0.19
ENSG00000227496.2	AC099066.2	4.87395	2.28509	2.68e-08	2.38e-06	7.57242	2.16177	1.11221	6.9e-05	0.000644504	4.16117	1.03	0.73	0.92	0.82	4.17	4.03	4.15	4.15	1.75	1.32	1.62	2.03
ENSG00000232626.3	AC099336.1	1.16083	0.215155	0.332148	0.434395	0.478668	-1.11474	-0.15671	0.506981	0.619424	-0.295008	1.68	0.91	2.66	1.16	1.97	1.88	2.03	1.5	0.96	1.13	1.26	1.35
ENSG00000236439.4	AC099336.2	1.23228	0.301334	0.151744	0.230412	0.818889	-1.024	-0.0342148	0.862152	0.907613	-0.0644159	20.65	16.82	14.19	11.48	17.4	20.56	20.84	18.16	13.63	14.81	13.7	13.62
ENSG00000270426.1	AC099343.2	-1.38715	-0.47212	0.0501553	0.0940167	-1.29968	-1.6548	-0.726659	0.0302177	0.0711775	-1.51974	0.7	0.74	1.11	0.98	0.48	0.66	0.54	0.66	0.61	0.16	0.41	0.47
ENSG00000271646.1	AC099343.3	-1.02095	-0.0299086	0.884527	0.916392	-0.0532888	-2.34911	-1.23212	0.00279999	0.0109457	-2.55284	0.31	0.29	0.37	0.53	0.27	0.38	0.36	0.35	0.1	0.06	0.23	0.14
ENSG00000260862.1	AC099506.1	-1.68364	-0.751587	0.0018571	0.00637177	-2.73116	-1.09094	-0.125571	0.415969	0.536708	-0.380939	1.26	1.37	1.84	1.97	1.26	1	0.72	0.68	1.61	1.28	1.04	1.33
ENSG00000280044.1	AC099506.2	-2.60631	-1.38201	0.0147471	0.0345194	-1.83129	-1.6733	-0.742692	0.0885267	0.165756	-1.05293	8.87	6.16	14.22	12.39	4.94	6.88	3.83	0.55	8.86	5.68	4.98	2.07
ENSG00000253882.6	AC099548.2	-1.5831	-0.662753	0.00147569	0.00529191	-2.831	1.19002	0.250984	0.0290695	0.0689732	1.53656	2.55	3.18	2.89	4.05	1.37	2.47	2.2	1.75	3.48	3.18	3.22	2.81
ENSG00000234287.1	AC099560.2	1.27401	0.349382	0.0202519	0.0447155	1.69353	-1.174	-0.231435	0.164829	0.267989	-0.782967	29.78	28.9	25.25	32.71	42.17	39.47	35.51	31.68	17.24	23.99	24.18	26.06
ENSG00000260236.1	AC099778.1	-1.07685	-0.106816	0.55338	0.648178	-0.256977	-1.07228	-0.100676	0.570788	0.675201	-0.243525	0.79	0.63	0.89	0.69	0.63	0.63	0.6	0.79	0.48	0.63	0.68	0.64
ENSG00000279570.1	AC099804.1	-1.49012	-0.575426	0.0520788	0.0968328	-1.28334	1.20371	0.26749	0.313845	0.436398	0.503285	0.97	0.7	1.22	0.87	0.85	0.57	0.65	0.36	0.99	0.62	0.96	1.24
ENSG00000236194.3	AC099811.1	-1.04514	-0.0636927	0.850296	0.89027	-0.0704301	-1.73553	-0.795378	0.0291374	0.0691138	-1.53555	0.71	0.83	1.51	1.81	1.54	1.59	0.65	0.75	0.65	0.56	0.33	0.78
ENSG00000278829.1	AC099811.5	-1.13332	-0.180552	0.379296	0.481623	-0.421022	-1.52305	-0.606964	0.0182256	0.0477261	-1.73932	1.23	1.8	2.54	2.43	1.89	1.86	1.5	1.34	1.22	0.99	0.92	1.25
ENSG00000273679.1	AC100757.1	1.0462	0.0651554	0.795763	0.849209	0.0992162	-1.37832	-0.462914	0.131868	0.226878	-0.879862	0.15	0.29	0.3	0.3	0.29	0.27	0.21	0.21	0.15	0.12	0.11	0.16
ENSG00000261529.1	AC100774.1	1.17532	0.23305	0.245019	0.339591	0.6108	1.07341	0.102207	0.374701	0.496784	0.426315	1.2	1.27	1.35	1.63	2.01	1.64	1.01	1.73	1.42	1.19	1.2	1.31
ENSG00000253982.1	AC100810.1	1.21513	0.281116	0.264796	0.36128	0.577089	-1.16103	-0.215405	0.426502	0.545787	-0.370079	3.87	3.67	2.42	2.51	4.2	3.43	4.1	4.22	2.58	2.44	3	2.11
ENSG00000272010.1	AC100814.1	1.63531	0.709565	0.0174006	0.039475	1.75944	1.15517	0.208107	0.429886	0.548531	0.366647	1.17	0.79	1.8	1.18	2.31	2.48	1.56	1.5	1.01	0.99	1.45	1.2
ENSG00000246582.2	AC100861.1	-1.04936	-0.0695062	0.672762	0.752517	-0.172139	1.19221	0.253639	0.0992267	0.181032	1.00337	2.44	2.57	1.8	1.91	1.67	2.09	2.04	2.11	2.29	2.5	2.7	2.4
ENSG00000250727.1	AC100871.1	-1.4597	-0.54567	0.032082	0.0652071	-1.49374	-1.08424	-0.116689	0.601387	0.701348	-0.220846	0.38	0.63	0.77	0.69	0.43	0.33	0.42	0.36	0.48	0.36	0.56	0.48
ENSG00000279041.1	AC102945.2	1.68768	0.755045	0.0309763	0.0633254	1.50897	1.19382	0.25558	0.259381	0.3784	0.586061	0.43	0.39	0.67	0.83	1.21	1.32	0.81	0.53	0.6	0.48	0.53	0.62
ENSG00000273230.1	AC102953.2	1.17739	0.235594	0.233694	0.3272	0.631352	1.31175	0.391489	0.0358899	0.0812846	1.44503	1.15	1.25	1.88	2.33	2.22	1.79	1.46	1.7	1.86	2	1.77	1.83
ENSG00000213560.4	AC103591.1	1.6912	0.758045	0.00390675	0.0115744	2.40818	1.66396	0.734621	0.0121567	0.0347844	1.91518	1.02	1.5	1.96	2.12	3.12	2.76	2.77	2.07	1.79	2.64	2.96	2.06
ENSG00000273338.1	AC103591.3	1.4641	0.550016	0.000709151	0.00291862	3.14926	1.39257	0.477748	0.00578289	0.019396	2.23785	40.54	32.28	39.16	33.84	58.19	53.18	50.41	53.96	59.34	43.59	41	47.52
ENSG00000257178.5	AC103702.1	1.14846	0.199703	0.504704	0.602675	0.296963	-1.13752	-0.185894	0.463665	0.579427	-0.333796	0.36	0.46	0.83	0.96	0.89	0.88	0.57	0.43	0.45	0.51	0.45	0.43
ENSG00000272763.1	AC103702.2	-1.40636	-0.491968	0.00305538	0.00947693	-2.51494	-1.35074	-0.433749	0.00114962	0.0054232	-2.93945	2.54	2.79	2.85	3.33	2.13	2.18	2.25	1.64	1.98	2.05	1.69	1.96
ENSG00000283045.1	AC103703.1	1.33995	0.422182	0.101628	0.167137	0.992986	1.09695	0.133498	0.603543	0.70313	0.219292	0.62	1.28	1.16	0.96	1.25	1.14	1.38	1.26	1.1	0.85	0.69	0.88
ENSG00000261220.2	AC103706.1	1.29966	0.378136	0.0569884	0.104072	1.24421	1.21317	0.278779	0.190287	0.298487	0.72059	1.69	1.88	1.48	2.29	2.35	2.32	2.57	1.83	1.74	2.65	1.75	1.71
ENSG00000285108.1	AC103718.1	1.44009	0.526155	0.0300407	0.0617716	1.52229	-1.24504	-0.316192	0.0945455	0.174532	-1.02436	2.57	2.77	4.32	4.53	6.2	5.51	3.94	4.1	2.77	2.59	2.38	2.8
ENSG00000261635.2	AC103988.1	1.03796	0.0537482	0.75228	0.815724	0.12362	1.09332	0.128718	0.483907	0.598133	0.315238	1.42	2.01	2.22	2.04	1.96	2.44	1.58	1.73	2.33	1.54	1.61	1.87
ENSG00000260328.1	AC104024.2	-1.42605	-0.512028	0.000735842	0.00300691	-3.13322	-2.14786	-1.1029	3.25e-05	0.000371066	-4.4877	1.22	1.07	1.31	1.26	0.91	0.8	0.7	0.85	0.36	0.53	0.61	0.51
ENSG00000259630.2	AC104046.1	1.45278	0.538816	0.00676381	0.0182066	2.16981	1.00471	0.00677274	0.974151	0.98381	0.0113735	3.09	4.2	5.18	5.19	6.66	6.69	5.65	5.48	4.42	3.2	2.98	4.78
ENSG00000273345.5	AC104109.4	1.18881	0.249523	0.479698	0.57892	0.319032	1.29053	0.367967	0.364933	0.48674	0.437787	0.17	0.31	0.17	0.5	0.24	0.32	0.28	0.28	0.24	0.2	0.22	0.36
ENSG00000271862.1	AC104118.1	1.02511	0.0357787	0.834521	0.878412	0.0785627	-1.27209	-0.347202	0.147162	0.246379	-0.832204	0.78	0.89	0.69	0.82	0.86	0.97	0.67	0.68	0.81	0.43	0.47	0.52
ENSG00000285399.2	AC104162.2	-1.0352	-0.0499068	0.709988	0.782243	-0.148749	-1.102	-0.140121	0.151236	0.251279	-0.820346	2.31	2.2	2.5	2.31	2.73	2.87	1.88	1.64	1.95	1.79	2	1.81
ENSG00000248858.7	AC104211.1	-1.9644	-0.974089	0.000454686	0.00205098	-3.34229	-1.31399	-0.393951	0.0330693	0.0763411	-1.48058	0.23	0.32	0.32	0.32	0.19	0.16	0.1	0.14	0.2	0.17	0.19	0.24
ENSG00000280173.1	AC104447.1	-1.11202	-0.153178	0.17409	0.257556	-0.759226	1.02507	0.0357171	0.758907	0.827792	0.119811	1.09	1.21	1.2	1.13	1.04	1.04	0.96	0.98	1.08	0.98	1.13	0.97
ENSG00000283189.2	AC104452.1	-9.64154	-3.26926	0.00172738	0.00600815	-2.76261	-1.36603	-0.449987	0.29872	0.420712	-0.524736	0.19	0.14	0.09	0.13	0.05	0.03	0	0	0.04	0.09	0.07	0.07
ENSG00000284952.1	AC104472.3	-1.0999	-0.137368	0.691383	0.767145	-0.160281	-1.33824	-0.420338	0.238538	0.35555	-0.622443	0.36	0.17	0.18	0.41	0.23	0.28	0.15	0.26	0.21	0.13	0.18	0.14
ENSG00000240036.4	AC104563.1	-1.06231	-0.0872052	0.599089	0.68989	-0.222509	-1.0069	-0.00992326	0.939618	0.961746	-0.0270488	9.81	8.22	10.04	8.08	6.76	9.37	9.67	8.01	8.78	8.43	7.08	8.38
ENSG00000264007.1	AC104564.2	-1.05115	-0.0719688	0.770572	0.83004	-0.113187	1.09976	0.13719	0.577035	0.68118	0.238798	2.62	2.23	2.83	1.41	2.37	1.93	1.94	1.93	2.08	1.92	2.14	2.5
ENSG00000265625.1	AC104564.5	-1.13813	-0.186667	0.370562	0.473206	-0.431139	-1.28414	-0.360799	0.0517028	0.108651	-1.28649	1.08	1.04	1.32	1.64	1.31	1.39	0.95	0.72	0.92	0.91	0.67	0.88
ENSG00000280046.1	AC104581.4	1.49383	0.579015	0.000916928	0.00357734	3.03766	1.58918	0.668286	0.00371785	0.0136774	2.42971	0.46	0.63	0.6	0.48	0.79	0.73	0.77	0.78	0.75	0.94	0.58	0.86
ENSG00000250144.1	AC104619.3	-1.03156	-0.0448264	0.749127	0.813053	-0.125444	-1.10156	-0.139543	0.258237	0.377317	-0.587981	23.55	33.74	29.53	31.19	28.93	30.87	30.13	21.75	23.51	29.63	23.04	26.28
ENSG00000270640.1	AC104695.4	-1.03313	-0.0470162	0.89057	0.920506	-0.050332	1.32098	0.401604	0.276879	0.397382	0.55771	2.16	2.52	4.85	6.6	3	4.39	3.2	2.89	5.33	3.26	3.1	4.59
ENSG00000279481.1	AC104791.2	1.32599	0.407065	0.0731295	0.127714	1.13591	-1.45118	-0.53723	0.0273907	0.0657509	-1.5624	0.51	0.37	0.68	0.6	0.84	0.89	0.53	0.55	0.37	0.29	0.24	0.38
ENSG00000260077.1	AC104794.2	-1.89501	-0.922209	0.00779385	0.0204522	-2.10825	-1.39596	-0.481262	0.186719	0.294289	-0.728811	0.4	0.38	0.36	0.27	0.22	0.22	0.14	0.12	0.08	0.31	0.2	0.23
ENSG00000251615.3	AC104825.1	-1.44076	-0.526826	0.00440298	0.0127098	-2.35625	-1.46104	-0.547	0.00352876	0.0131267	-2.45238	0.46	0.46	0.53	0.52	0.4	0.37	0.25	0.31	0.37	0.28	0.25	0.28
ENSG00000235400.1	AC104837.1	1.30017	0.378699	0.17841	0.26277	0.748582	1.34106	0.423373	0.0633652	0.127224	1.19815	0.25	0.4	0.54	0.47	0.69	0.39	0.61	0.39	0.43	0.45	0.49	0.47
ENSG00000261451.1	AC104964.3	1.22019	0.287103	0.266258	0.362855	0.574697	-2.12472	-1.08727	0.00282092	0.0109976	-2.54961	0.1	0.13	0.18	0.12	0.23	0.18	0.1	0.13	0.07	0.04	0.05	0.03
ENSG00000203392.3	AC105020.1	-1.29749	-0.375729	0.0672734	0.119271	-1.17216	-1.06	-0.0840701	0.70016	0.781801	-0.154803	0.4	0.53	0.61	0.77	0.51	0.48	0.34	0.36	0.48	0.62	0.45	0.34
ENSG00000260269.5	AC105036.3	1.12469	0.169533	0.473691	0.573713	0.324504	-1.15919	-0.213111	0.398557	0.520098	-0.39951	2.77	2.24	1.7	2.34	1.87	1.98	3.18	2.51	2.05	0.94	1.63	1.92
ENSG00000213385.3	AC105052.2	1.04741	0.0668221	0.675827	0.755163	0.170164	1.52166	0.605644	0.00104505	0.00502628	2.98086	2.72	2.43	2.82	2.26	2.92	2.57	2.91	2.1	3.43	3.16	3.47	3.74
ENSG00000267645.5	AC105052.3	-1.67193	-0.741514	0.000140727	0.000812593	-3.85162	1.30129	0.379941	0.00490123	0.0170244	2.30969	8.45	11.77	10.14	9.14	6.26	4.95	5.74	5.22	10.98	11.84	11.86	13.14
ENSG00000279168.2	AC105052.4	1.11174	0.152818	0.226581	0.319006	0.644776	1.4196	0.505488	0.00763405	0.0240228	2.11724	1.33	1.37	1.74	1.42	1.57	1.72	1.5	1.49	2.25	1.93	1.64	1.57
ENSG00000279319.1	AC105074.1	1.40747	0.493106	0.105921	0.172705	0.975019	1.57529	0.655619	0.00461728	0.0162142	2.33561	0.23	0.23	0.19	0.25	0.52	0.37	0.22	0.21	0.27	0.37	0.32	0.27
ENSG00000276744.1	AC105137.2	1.00247	0.00355483	0.986312	0.99084	0.00598573	-1.14603	-0.196641	0.322473	0.44499	-0.491506	0.91	0.73	1.1	0.85	0.83	1.06	0.97	0.65	0.8	0.55	0.64	0.69
ENSG00000177725.5	AC105206.1	1.09413	0.129786	0.455854	0.556501	0.341174	1.27884	0.354837	0.109461	0.19598	0.960741	0.83	0.57	0.82	0.95	1.07	0.88	0.71	0.7	1.25	0.86	0.76	0.72
ENSG00000181097.5	AC105219.1	1.04249	0.0600399	0.82962	0.874675	0.0811207	-1.01922	-0.0274592	0.944965	0.964814	-0.0245842	0.16	0.25	0.33	0.51	0.32	0.31	0.22	0.32	0.25	0.35	0.1	0.32
ENSG00000284606.1	AC105233.5	1.25922	0.332535	0.115009	0.184788	0.939268	1.08961	0.123805	0.524029	0.634572	0.280644	0.31	0.27	0.44	0.57	0.52	0.56	0.37	0.42	0.36	0.31	0.36	0.41
ENSG00000279786.1	AC105235.1	1.21109	0.276309	0.046505	0.088262	1.3325	1.14061	0.1898	0.172405	0.277431	0.763449	1.96	2.13	2.01	1.69	2.27	2.24	2.31	2.17	2.11	1.86	1.84	2.12
ENSG00000250746.1	AC105250.1	1.1295	0.175682	0.639185	0.72513	0.194373	-1.05822	-0.0816414	0.832744	0.886162	-0.0794887	0.13	0.16	0.29	0.57	0.37	0.33	0.17	0.22	0.16	0.19	0.25	0.13
ENSG00000245213.6	AC105285.1	-1.46526	-0.551161	0.058676	0.106678	-1.23154	-1.65709	-0.72865	0.0272278	0.0654384	-1.56499	1.26	1.51	1.44	2.28	1.2	1.73	1.23	0.53	0.39	0.98	1.42	0.74
ENSG00000252690.3	AC105339.2	1.45858	0.544565	0.000209432	0.0011169	3.67896	1.33541	0.417278	0.00246621	0.0099244	2.60797	1.19	1.11	1.02	1.13	1.53	1.61	1.48	1.52	1.38	1.33	1.21	1.45
ENSG00000276337.1	AC105429.1	-1.56534	-0.646476	0.151496	0.230166	-0.819598	-1.26431	-0.33835	0.376941	0.498679	-0.423727	0.29	0.36	0.86	1.14	0.53	0.46	0.24	0.25	0.48	0.34	0.4	0.36
ENSG00000227252.1	AC105760.2	-1.83934	-0.879185	0.0121342	0.029424	-1.91599	-1.09872	-0.135828	0.58851	0.690293	-0.230246	0.25	0.38	0.32	0.22	0.14	0.13	0.12	0.19	0.2	0.25	0.22	0.19
ENSG00000246792.2	AC106038.1	1.45309	0.539123	0.0412058	0.0800819	1.38504	1.37835	0.462939	0.147229	0.246388	0.832007	0.18	0.24	0.17	0.17	0.39	0.43	0.3	0.24	0.23	0.29	0.17	0.2
ENSG00000258130.8	AC106782.1	-1.33257	-0.414214	0.194057	0.281463	-0.712071	-1.7109	-0.774753	0.0141264	0.038985	-1.84997	0.49	0.34	0.7	0.54	0.85	0.52	0.32	0.55	0.1	0.28	0.2	0.42
ENSG00000260219.2	AC106782.2	-1.05076	-0.0714274	0.81561	0.864229	-0.0885173	1.04013	0.056758	0.845565	0.895159	0.0728532	0.63	0.4	0.84	0.61	0.45	0.49	0.84	0.44	0.55	0.3	0.66	0.59
ENSG00000170089.15	AC106795.1	1.12473	0.169581	0.0845994	0.143942	1.07263	-1.12551	-0.170573	0.0831842	0.157785	-1.07996	115.08	132.86	120.11	103.93	121.73	131.1	131.38	130.02	99.01	110.46	90.5	99.14
ENSG00000249779.1	AC106800.2	1.02466	0.0351426	0.91	0.935599	0.0409584	-1.20315	-0.26682	0.253589	0.371953	-0.595869	0.47	0.67	0.67	1.01	0.98	1.02	0.37	0.59	0.51	0.56	0.33	0.54
ENSG00000260293.2	AC106820.4	1.06496	0.0908007	0.435743	0.536714	0.36077	1.01322	0.0189493	0.891702	0.928554	0.0497803	0.36	0.36	0.46	0.52	0.48	0.42	0.44	0.39	0.34	0.45	0.31	0.42
ENSG00000282034.1	AC106886.5	1.02729	0.0388463	0.922757	0.944712	0.0349129	-1.20077	-0.263962	0.447808	0.564731	-0.348908	1.57	1.66	3.72	4.84	3.84	3.45	1.79	1.94	2.4	1.71	2	2.15
ENSG00000261051.1	AC107021.2	-1.03724	-0.0527481	0.734587	0.801409	-0.133956	-1.45529	-0.541308	0.0211138	0.0535531	-1.67543	0.33	0.4	0.37	0.41	0.36	0.35	0.37	0.33	0.27	0.16	0.2	0.26
ENSG00000261167.1	AC107027.3	1.22896	0.297443	0.0198127	0.0439014	1.70306	-1.20473	-0.26871	0.0687885	0.135844	-1.16248	0.7	0.64	0.77	0.76	0.98	0.89	0.72	0.83	0.63	0.49	0.43	0.57
ENSG00000243071.1	AC107032.1	-1.15065	-0.202452	0.553612	0.648404	-0.256794	1.31547	0.395583	0.244824	0.362018	0.611147	2.41	3.09	1.55	2.11	2.23	1.15	2.63	1.59	1.6	3.48	3.17	2.29
ENSG00000259959.1	AC107068.1	-1.39403	-0.479261	0.0662949	0.117967	-1.17852	-1.41237	-0.498123	0.0336575	0.0774128	-1.47292	1.06	1.18	2.08	1.69	1.34	1.26	0.72	0.78	1.17	0.89	0.74	0.94
ENSG00000251600.7	AC107223.1	1.52664	0.610358	0.0358586	0.0714305	1.44541	-2.03061	-1.02191	0.00230285	0.00939324	-2.63773	0.87	1.54	1.94	2.22	3.04	2.28	1.98	1.37	0.51	0.58	0.57	0.6
ENSG00000259891.1	AC107375.1	1.21103	0.276237	0.152076	0.230787	0.817939	1.1372	0.185482	0.266058	0.385329	0.575023	1.05	0.88	1.52	1.51	1.82	1.58	1.1	1.25	1.01	1.36	1.25	1.24
ENSG00000260007.3	AC107871.1	-1.17941	-0.238068	0.0237941	0.0509724	-1.62353	1.06513	0.0910313	0.304444	0.426665	0.516492	5.84	4.33	5.7	5.77	4.56	4.38	3.82	3.89	5.71	4.72	5.4	5.65
ENSG00000261549.2	AC107954.1	-1.40654	-0.492148	0.116149	0.186176	-0.934985	1.48413	0.569616	0.0234427	0.0581686	1.62999	1.49	1.57	0.97	1.3	1.27	0.84	0.58	1.11	1.53	1.86	1.64	1.85
ENSG00000197149.5	AC107956.1	-1.33979	-0.422005	0.230517	0.323396	-0.637296	1.05471	0.07685	0.806607	0.866187	0.093338	0.55	1.36	1.65	0.98	0.65	0.84	1.03	0.48	0.67	0.99	1.04	1.23
ENSG00000250111.3	AC107982.1	-2.69145	-1.42839	0.12894	0.203021	-0.889612	-4.08133	-2.02904	0.0423161	0.0925617	-1.37349	0.14	0.23	1	0.45	0	0.21	0.13	0.38	0	0.14	0	0.23
ENSG00000227077.3	AC107983.1	-1.77957	-0.831525	0.416902	0.519036	-0.379966	1.17336	0.230643	0.355745	0.477632	0.448861	11.96	15.27	14.32	7.94	16.36	14.27	20.25	0	12.6	14.49	14.5	10.77
ENSG00000242588.6	AC108010.1	-1.61629	-0.692685	0.0278864	0.0580719	-1.55461	1.04821	0.0679288	0.743652	0.815726	0.128631	6.27	6.65	11.31	12.92	7.28	6.2	3.96	4.03	9.23	8.42	7.73	8.86
ENSG00000261889.1	AC108134.2	-1.03316	-0.0470678	0.850709	0.89053	-0.070219	1.23403	0.30338	0.137726	0.23436	0.860985	1.19	1.42	1.04	1.31	1.49	0.8	1.02	1.41	1.13	1.5	1.18	1.54
ENSG00000271590.1	AC108463.3	3.31917	1.73082	0.00177539	0.00614875	2.75071	-1.53625	-0.619415	0.0981732	0.17962	-1.00801	0.43	0.33	0.7	1.06	2.8	2.52	1.01	1.68	0.43	0.34	0.25	0.22
ENSG00000242282.6	AC108488.1	-1.68743	-0.754825	0.0131141	0.0313264	-1.88226	-1.46271	-0.548648	0.0165551	0.0441986	-1.78107	2.23	3.39	2.32	3.06	0.98	1.83	1.95	1.99	1.69	2.03	1.62	1.39
ENSG00000243508.1	AC108688.1	-1.10449	-0.143378	0.752729	0.815838	-0.123361	-1.20089	-0.264101	0.480479	0.594769	-0.318326	1.22	1.56	3.93	4.41	3.56	2.74	1.02	1.97	1.94	1.39	1.64	1.95
ENSG00000239280.1	AC108693.1	1.23958	0.309855	0.211549	0.302338	0.67459	1.10531	0.144447	0.55642	0.663261	0.254597	2.54	3	5.12	3.6	5.95	4.14	3.07	4.01	2.58	4.39	2.68	4.06
ENSG00000279500.1	AC108704.2	1.17763	0.235889	0.124472	0.19704	0.90493	1.35373	0.43694	0.00476607	0.0166526	2.32184	0.93	0.77	0.98	1.04	1.02	1.31	0.93	0.99	1.06	1.15	1.11	1.12
ENSG00000241003.1	AC108860.1	-1.31377	-0.393713	0.195577	0.283161	-0.708681	1.08619	0.11927	0.620252	0.716695	0.207432	3.17	4.93	7.62	6.92	3.24	6.19	3.58	3.47	5.87	5.59	4.49	4.79
ENSG00000261437.1	AC108860.2	-1.70163	-0.766913	0.00152916	0.00544625	-2.81555	-1.09611	-0.132395	0.364443	0.486127	-0.43837	0.87	0.68	0.8	0.77	0.41	0.45	0.52	0.37	0.59	0.7	0.6	0.6
ENSG00000286010.1	AC108925.1	-2.19379	-1.13343	1.13e-05	0.000123648	-4.948	-1.26608	-0.340367	0.0261429	0.0634027	-1.58265	0.75	0.87	0.99	0.84	0.46	0.32	0.33	0.4	0.55	0.51	0.66	0.71
ENSG00000255224.1	AC109322.1	-1.335	-0.41684	0.09115	0.152744	-1.04024	1.0436	0.0615632	0.764457	0.832581	0.116647	0.62	0.66	0.76	0.58	0.39	0.62	0.36	0.56	0.59	0.56	0.75	0.49
ENSG00000279602.1	AC109326.1	1.65026	0.72269	0.000486822	0.00216245	3.31263	1.28292	0.35943	0.0318779	0.0741407	1.49651	4.19	3.46	3.09	3.1	4.97	5.34	5.5	5.75	3.5	4.49	3.98	4.14
ENSG00000261067.7	AC109460.3	-1.09618	-0.132486	0.463007	0.563481	-0.334412	-1.0884	-0.122209	0.500503	0.613336	-0.300593	0.21	0.16	0.23	0.24	0.16	0.17	0.21	0.18	0.14	0.15	0.16	0.22
ENSG00000277152.1	AC110048.2	-1.11236	-0.153624	0.405418	0.507981	-0.392096	-1.20178	-0.265168	0.175349	0.281072	-0.756097	0.29	0.25	0.46	0.4	0.36	0.35	0.23	0.26	0.27	0.19	0.25	0.28
ENSG00000260404.3	AC110079.1	-1.03725	-0.0527665	0.716257	0.786712	-0.144931	-1.10635	-0.145809	0.318568	0.441086	-0.496798	1.37	1.36	1.75	2.19	1.78	1.62	1.28	1.32	1.53	1.38	1.27	1.16
ENSG00000260578.1	AC110597.1	4.5879	2.19783	5.14e-05	0.000379652	4.28865	1.66252	0.733376	0.0212946	0.0538663	1.67173	0.12	0.13	0.11	0.25	0.8	0.91	0.43	0.64	0.19	0.16	0.22	0.23
ENSG00000270019.1	AC110769.2	-1.22318	-0.29064	0.16174	0.242723	-0.791182	-1.0273	-0.038855	0.838932	0.890259	-0.0762731	0.72	0.9	1.06	0.66	0.64	0.78	0.55	0.64	0.67	0.74	0.58	0.83
ENSG00000279957.1	AC110769.3	-1.15337	-0.20586	0.348044	0.450508	-0.458366	1.37647	0.460972	0.0223773	0.0559677	1.65019	0.95	1.18	1.73	1.16	1.15	1.44	0.86	0.77	1.68	1.41	1.26	1.62
ENSG00000282978.1	AC110994.2	1.15854	0.212311	0.456671	0.557194	0.340396	1.10222	0.14041	0.600643	0.700925	0.221384	3.41	4.45	3.46	2.15	3.67	3.24	3.06	5.17	3.29	3.09	2.49	4.15
ENSG00000279801.1	AC111170.3	-1.30935	-0.388848	0.280493	0.378744	-0.552078	-1.48439	-0.569867	0.0812268	0.154842	-1.0903	0.78	1.1	2.02	2.34	1.72	1.15	0.92	0.64	0.88	0.98	0.76	0.76
ENSG00000285943.1	AC112128.1	1.01862	0.0266093	0.765291	0.82622	0.116174	1.02644	0.0376506	0.700523	0.78198	0.154578	1.33	1.66	1.46	1.55	1.58	1.49	1.3	1.35	1.44	1.57	1.41	1.25
ENSG00000254373.1	AC112191.2	1.10819	0.148207	0.363278	0.466035	0.439761	1.18173	0.240904	0.216105	0.329452	0.665335	9.54	8.63	7.34	10.33	10.44	8.89	10.47	8.84	12.24	8.81	7.48	10.39
ENSG00000271643.2	AC112220.2	1.19256	0.25406	0.0572594	0.104508	1.24215	1.3433	0.425779	0.00292614	0.0113058	2.5337	1.35	1.39	1.47	1.13	1.59	1.36	1.44	1.6	1.67	1.68	1.49	1.65
ENSG00000214773.1	AC112512.1	1.29705	0.375237	0.183614	0.269041	0.736093	-1.04173	-0.0589879	0.818301	0.874985	-0.0870868	0.43	0.6	0.45	0.45	0.8	0.85	0.53	0.37	0.31	0.29	0.45	0.55
ENSG00000279837.1	AC112694.2	-1.01915	-0.0273604	0.941688	0.959044	-0.0260928	1.00531	0.00763985	0.984843	0.990276	0.00663301	0.65	0.87	0.4	0.95	0.77	0.52	0.42	0.94	0.52	0.56	0.39	0.54
ENSG00000256663.1	AC112777.1	-1.13989	-0.188901	0.197929	0.286055	-0.70349	-1.30307	-0.381912	0.026041	0.0631842	-1.58434	5.68	6.3	4.56	4.85	4.16	4.32	4.7	4.57	3.57	3.25	4.15	3.94
ENSG00000263826.1	AC112907.3	-1.21611	-0.282276	0.276724	0.374682	-0.557953	-1.01502	-0.0215142	0.922539	0.950167	-0.0350153	0.24	0.25	0.24	0.28	0.19	0.18	0.15	0.31	0.21	0.18	0.29	0.17
ENSG00000272884.1	AC113189.4	-1.5979	-0.67618	0.00534364	0.0149428	-2.27216	1.48559	0.571039	0.0014881	0.00664554	2.82737	0.4	0.39	0.43	0.6	0.33	0.36	0.25	0.17	0.69	0.52	0.57	0.59
ENSG00000254893.6	AC113404.3	-1.13491	-0.182575	0.433209	0.534366	-0.363302	1.10396	0.14269	0.484616	0.598732	0.314602	3.67	2.66	2.44	2.54	2.5	1.96	2.99	2.08	2.41	2.51	2.83	3.22
ENSG00000250020.1	AC113430.1	-1.44666	-0.532725	0.0740703	0.128959	-1.13036	-1.45286	-0.538895	0.0994939	0.181405	-1.0022	1.36	2.44	3.46	3.51	1.74	2.1	1.6	1.33	1.61	1.18	1.19	2.22
ENSG00000226084.5	AC113935.1	-1.05081	-0.0715038	0.491247	0.590297	-0.3087	-1.01591	-0.0227717	0.855226	0.902519	-0.0679192	12.95	13.04	13.15	11.21	11.08	12.22	11.15	11.95	9.53	11.73	10.85	13.45
ENSG00000274425.1	AC114271.1	1.20184	0.265242	0.134248	0.209474	0.872093	1.35255	0.435678	0.0174701	0.0461102	1.7577	0.44	0.31	0.47	0.54	0.52	0.49	0.44	0.55	0.52	0.55	0.48	0.49
ENSG00000271741.1	AC114490.2	1.08431	0.116776	0.428587	0.529836	0.367961	1.26538	0.339576	0.0426134	0.0931102	1.37045	1.95	1.38	1.56	2.32	1.84	1.81	1.97	1.63	2.31	1.96	2.01	1.77
ENSG00000284773.1	AC114490.3	-1.5985	-0.676718	0.126253	0.199372	-0.898759	1.02441	0.034793	0.926535	0.953008	0.0331381	0.26	0.09	0.22	0.2	0.04	0.17	0.13	0.09	0.13	0.26	0.15	0.11
ENSG00000224550.1	AC114491.1	1.42754	0.513531	0.0403145	0.0786046	1.39454	1.0789	0.109566	0.637598	0.731349	0.195453	10.26	14.05	16.15	8.01	17.14	14.94	18.97	15.71	12.65	10.11	10.39	13.37
ENSG00000241612.1	AC114728.1	-1.02983	-0.0424062	0.851622	0.891241	-0.0697532	1.05134	0.0722348	0.70725	0.786642	0.150427	4.65	6.64	7.9	5.26	4.82	8.32	5.76	4.52	5.15	7.36	4.96	5.73
ENSG00000214846.4	AC114744.1	1.21236	0.277823	0.347495	0.450068	0.459051	1.29167	0.369241	0.216841	0.330228	0.663858	0.9	1.21	0.79	0.83	0.74	1.44	1.01	1.19	1.09	1.13	1.17	0.66
ENSG00000228043.5	AC114763.1	-1.53043	-0.613934	0.010663	0.0264305	-1.97212	-1.15057	-0.20235	0.251709	0.370065	-0.599102	0.75	0.82	0.88	1.14	0.77	0.64	0.46	0.41	0.61	0.63	0.64	0.73
ENSG00000251023.1	AC114980.1	-1.71211	-0.775776	0.0112173	0.027585	-1.95011	1.06255	0.0875277	0.684931	0.76907	0.164353	0.17	0.18	0.24	0.24	0.19	0.14	0.07	0.09	0.26	0.17	0.14	0.2
ENSG00000243199.1	AC115223.1	1.08442	0.116927	0.350885	0.453333	0.454836	1.08478	0.117407	0.293496	0.415215	0.532397	8.73	10.62	8.4	8.82	9.58	11.18	8.36	8.79	9.28	8.58	9.68	8.45
ENSG00000253341.1	AC115837.1	1.20189	0.2653	0.737205	0.80329	0.132411	-1.10112	-0.138966	0.889708	0.927221	-0.0507525	0.43	0.13	1.08	2.24	1.21	0.74	0.42	0.43	0.41	0.33	0.19	0.4
ENSG00000259326.1	AC116158.1	1.27689	0.35263	0.161105	0.241952	0.79289	1.04846	0.0682767	0.762423	0.830903	0.117804	0.23	0.36	0.32	0.23	0.37	0.47	0.27	0.29	0.24	0.22	0.25	0.27
ENSG00000283782.2	AC116366.3	-1.43236	-0.518399	0.00857942	0.0220801	-2.06654	-1.29232	-0.369965	0.0343977	0.0786535	-1.46347	0.69	0.96	1.15	0.75	0.6	0.62	0.47	0.58	0.65	0.55	0.61	0.61
ENSG00000280033.1	AC116407.4	-1.23468	-0.304138	0.480167	0.579443	-0.318608	-1.33223	-0.413848	0.322295	0.444836	-0.491747	0.43	0.67	1.31	2.09	1.13	0.9	0.5	0.56	0.47	0.56	0.7	0.66
ENSG00000244398.1	AC116533.1	-1.01817	-0.0259854	0.740454	0.805908	-0.130502	1.01759	0.0251576	0.731596	0.806208	0.135728	184.34	190.94	164.11	146.14	159.93	156.64	166.3	178.16	168.65	170.68	175.28	168.7
ENSG00000284727.1	AC116562.4	-1.15467	-0.207484	0.338048	0.440475	-0.471021	-1.52481	-0.608631	0.0103732	0.0305616	-1.98409	0.8	0.76	0.96	1.5	1.15	0.84	0.71	0.62	0.64	0.52	0.47	0.59
ENSG00000261351.2	AC116913.1	-1.11832	-0.161338	0.514665	0.611547	-0.288476	-1.10048	-0.138136	0.603976	0.703582	-0.218981	0.56	0.55	0.33	0.44	0.38	0.48	0.39	0.34	0.37	0.38	0.27	0.48
ENSG00000285625.1	AC117378.1	-2.02921	-1.02092	0.00537161	0.0150029	-2.2699	-2.53036	-1.33934	0.124831	0.217482	-0.903676	1.33	1.37	2.04	2.14	0.39	0.68	0.84	1.13	0.84	0	1.31	1.44
ENSG00000240695.1	AC117382.1	1.01451	0.0207886	0.910789	0.936172	0.0405822	-1.18866	-0.249341	0.139342	0.23643	-0.855918	8.39	8.93	12.61	12.63	12.55	11.21	7.03	10.43	10.05	7.2	6.65	8.24
ENSG00000261758.1	AC117382.2	-1.19813	-0.260782	0.449922	0.550661	-0.346862	-1.15059	-0.202373	0.634566	0.728655	-0.197523	0.15	0.22	0.09	0.17	0.13	0.12	0.08	0.13	0.11	0.14	0.09	0.06
ENSG00000240854.1	AC117409.1	-1.2159	-0.282026	0.512121	0.609284	-0.290627	1.28928	0.36657	0.340594	0.463043	0.467763	0.71	0.85	0.87	0.25	0.6	0.64	0.46	0.29	0.69	0.73	0.68	0.7
ENSG00000205041.1	AC118344.1	-1.16022	-0.214402	0.37116	0.473745	-0.430439	-1.07779	-0.108083	0.505229	0.617584	-0.296512	0.84	1.23	1.45	1.51	1.65	0.95	0.72	0.98	1.06	0.98	1.06	0.93
ENSG00000279759.1	AC118344.2	-1.05027	-0.0707664	0.60098	0.691674	-0.22114	1.20742	0.271928	0.0453264	0.0977955	1.34365	0.92	1.13	1.29	1.62	1.23	1.19	0.95	1.04	1.26	1.38	1.35	1.25
ENSG00000036549.13	AC118549.1	1.25353	0.325995	9.39e-05	0.000597441	4.02752	1.10523	0.14435	0.0122024	0.034859	1.91355	19.52	20.87	21.54	20.23	25.36	25.51	24.34	25.58	21.75	21.15	21.59	22.36
ENSG00000283761.1	AC118553.2	1.54306	0.625791	0.00211364	0.00707277	2.67497	1.09439	0.130129	0.600859	0.701075	0.221228	0.45	0.46	0.57	0.78	0.83	1.19	0.75	0.73	0.62	0.31	0.64	0.75
ENSG00000183018.9	AC118754.1	-5.28201	-2.40109	0.00011906	0.000716011	-3.92424	-5.75946	-2.52593	0.000492684	0.00282199	-3.30743	0.33	0.42	0.25	0.39	0.11	0.05	0.02	0.04	0.04	0.13	0.08	0
ENSG00000282221.1	AC119427.1	1.39089	0.476003	0.0603151	0.109223	1.21957	-1.00453	-0.00652706	0.980204	0.987739	-0.00868344	4.08	2.65	2.27	3.43	4.32	3.9	4.94	3.4	2.91	2.64	3.44	1.92
ENSG00000271971.1	AC120053.1	1.21188	0.277243	0.303095	0.403139	0.518422	-1.08525	-0.118024	0.637442	0.731222	-0.19556	0.88	0.87	1.54	1.78	2.17	1.31	1.06	1.29	1.05	0.94	0.69	1.1
ENSG00000247735.2	AC120114.1	-1.33572	-0.417614	0.0688598	0.121649	-1.16203	-1.25506	-0.327751	0.239423	0.356441	-0.620835	0.59	0.66	0.47	0.57	0.52	0.44	0.4	0.31	0.28	0.43	0.6	0.33
ENSG00000279789.1	AC120114.3	1.07569	0.105262	0.505995	0.603904	0.295854	-1.10838	-0.148455	0.29611	0.417952	-0.528547	1.51	1.26	1.56	2.15	1.57	2.05	1.37	1.6	1.17	1.37	1.14	1.35
ENSG00000278385.1	AC121338.2	-1.25707	-0.330064	0.245359	0.340004	-0.610199	-1.3073	-0.386593	0.219968	0.334068	-0.65764	0.36	0.38	0.28	0.26	0.23	0.25	0.3	0.17	0.14	0.21	0.28	0.15
ENSG00000257497.2	AC121761.1	1.04256	0.0601353	0.784121	0.840441	0.105617	1.28895	0.366194	0.149391	0.248939	0.825675	0.37	0.39	0.3	0.36	0.39	0.42	0.28	0.31	0.28	0.4	0.41	0.43
ENSG00000279233.1	AC122688.3	-1.10666	-0.146213	0.32874	0.430738	-0.483148	1.41695	0.502788	0.00772063	0.0242237	2.11235	0.36	0.32	0.4	0.42	0.42	0.33	0.29	0.26	0.37	0.46	0.49	0.55
ENSG00000250461.1	AC122718.1	1.02895	0.0411694	0.844015	0.885673	0.0736501	1.19448	0.256383	0.212533	0.324873	0.672575	2.11	3.3	4.02	2.61	2.96	3.02	2.36	3.57	3.47	2.52	3.26	3.24
ENSG00000251682.1	AC122718.2	-1.38006	-0.464728	0.16719	0.249306	-0.77679	-1.35945	-0.443024	0.125543	0.218444	-0.901207	1.8	2.09	2.8	3.89	3.15	2.3	1.08	1.28	1.98	1.21	1.19	2.27
ENSG00000262728.5	AC123768.3	-1.11765	-0.160467	0.602754	0.693272	-0.21986	-1.29671	-0.374857	0.11031	0.197257	-0.957386	0.55	0.46	0.67	0.9	0.88	0.72	0.24	0.52	0.46	0.29	0.32	0.36
ENSG00000273156.2	AC124016.2	2.01193	1.00858	0.000622615	0.00262931	3.20578	1.0068	0.00977533	0.962755	0.97668	0.0164842	0.31	0.4	0.45	0.33	0.81	0.83	0.79	0.51	0.27	0.41	0.27	0.34
ENSG00000272077.1	AC124045.1	-1.10182	-0.139894	0.502813	0.60086	-0.298593	-1.03822	-0.0541073	0.772742	0.83928	-0.111965	0.42	0.6	0.73	0.78	0.77	0.48	0.43	0.54	0.42	0.63	0.52	0.5
ENSG00000254991.1	AC124276.1	-2.5178	-1.33216	0.00394944	0.0116795	-2.40346	-1.24775	-0.319325	0.21952	0.333576	-0.658527	0.86	0.89	0.62	0.69	0.13	0.3	0.27	0.38	0.54	0.5	0.46	0.44
ENSG00000262652.1	AC124283.3	-1.28251	-0.358966	0.58129	0.673216	-0.235607	-1.60595	-0.683428	0.294998	0.416897	-0.530181	0.46	0.58	2.35	3.05	1.82	1.18	0.54	0.4	0.68	0.47	0.56	0.39
ENSG00000173821.19	AC124319.1	-1.29084	-0.368307	0.0594368	0.107813	-1.22594	-1.6748	-0.743989	0.00109144	0.00519626	-2.962	17.11	15.94	25.94	26.97	18.06	18.29	14.25	14.17	12.07	10.93	11.55	11.99
ENSG00000280248.1	AC124319.5	-1.07716	-0.10723	0.709636	0.782092	-0.148964	-1.26678	-0.34117	0.227733	0.343058	-0.642574	0.18	0.23	0.41	0.52	0.37	0.24	0.2	0.31	0.18	0.21	0.2	0.21
ENSG00000260196.1	AC124798.1	-1.26688	-0.341277	0.0145076	0.0340178	-1.8384	-1.25011	-0.32206	0.0191171	0.0495095	-1.71858	1.04	0.86	1.05	1.1	0.75	0.73	0.79	0.79	0.77	0.66	0.74	0.67
ENSG00000260261.2	AC124944.3	-1.24498	-0.316127	0.0348996	0.0698407	-1.45718	1.06206	0.08686	0.470671	0.585802	0.327283	2.88	3.21	3.91	3.79	3.31	2.78	2.35	2.32	3.15	3.89	2.98	3.04
ENSG00000231259.5	AC125232.1	-1.88523	-0.914742	0.00258203	0.0082882	-2.58804	1.45554	0.541559	0.0192382	0.0497345	1.71584	2.52	1.53	3.34	3.05	1.13	1.35	1.36	1.22	3.29	3.5	3.53	2.76
ENSG00000285793.1	AC125232.2	-1.9744	-0.981413	3.52e-05	0.000283205	-4.45354	1.01665	0.0238296	0.819062	0.87547	0.0866832	2.59	3	2.64	3.11	1.75	1.59	1.14	1.1	2.48	2.68	2.26	2.96
ENSG00000259623.1	AC125257.1	1.11858	0.161668	0.421071	0.523261	0.375644	1.03618	0.0512809	0.776882	0.842927	0.109645	4.11	4.09	3	2.62	3.83	2.84	3.49	4.23	3.21	2.83	3.51	3.45
ENSG00000257954.1	AC125611.2	-1.53557	-0.618771	0.0789119	0.135878	-1.10286	-1.25864	-0.331867	0.249601	0.367854	-0.602754	2.39	2.24	4.55	5.61	3.16	2.81	1.43	1.66	2.76	2.42	1.76	2.74
ENSG00000257169.1	AC125612.1	-1.31517	-0.395244	0.0753338	0.130739	-1.12301	-1.04205	-0.059421	0.759715	0.828517	-0.119349	5.12	5.22	9.47	7.88	5.76	4.83	4.33	4.87	6.63	5.48	5.56	5.35
ENSG00000234589.4	AC125807.1	1.06609	0.092334	0.545543	0.640947	0.263171	-1.18689	-0.247186	0.14249	0.240547	-0.846216	5.86	7.55	5.58	5.48	5.76	6.62	6.5	6.14	4.59	4.07	4.4	5.22
ENSG00000250899.3	AC125807.2	1.09763	0.134393	0.0730673	0.127619	1.13628	-1.73888	-0.798154	2e-06	5.06e-05	-5.69801	3.13	3.11	3.36	3.91	3.45	3.55	3.45	3.4	1.76	1.71	1.88	1.67
ENSG00000264215.1	AC126365.1	-1.46509	-0.550992	0.0656891	0.117133	-1.18251	1.14097	0.190258	0.532862	0.642262	0.273385	0.24	0.42	0.29	0.52	0.32	0.27	0.16	0.16	0.19	0.47	0.33	0.4
ENSG00000279148.1	AC126474.1	1.35272	0.43586	0.0657289	0.117191	1.18224	1.12454	0.169333	0.54389	0.652167	0.264489	0.46	0.72	0.66	0.48	0.76	0.93	0.61	0.74	0.85	0.57	0.39	0.5
ENSG00000280088.1	AC126474.2	1.16019	0.214357	0.294293	0.393403	0.531221	-1.01543	-0.0220969	0.906139	0.939265	-0.0428052	1.12	1.36	0.87	1.08	1.06	1.47	1.21	1.22	0.83	1.01	1.04	0.94
ENSG00000205746.9	AC126755.1	1.24349	0.314399	0.116665	0.186782	0.933059	1.08812	0.121837	0.541569	0.650256	0.266346	2.63	2.84	3.5	4.7	4.38	3.82	3.02	2.95	3.01	3.23	2.67	3.48
ENSG00000275383.1	AC126773.4	-1.68013	-0.748576	0.00357598	0.0107638	-2.4466	-1.12492	-0.16982	0.416679	0.537251	-0.380199	0.2	0.2	0.2	0.31	0.15	0.14	0.1	0.11	0.15	0.21	0.13	0.18
ENSG00000263603.1	AC127024.2	1.0674	0.0941048	0.7503	0.813943	0.124765	1.11	0.150559	0.475851	0.590641	0.322529	0.71	1.1	1.16	1.07	1.14	1.2	0.56	1.45	0.73	1.17	0.89	1.09
ENSG00000266490.1	AC127024.5	1.0238	0.0339284	0.90711	0.933398	0.04234	-1.46394	-0.549856	0.101376	0.184082	-0.994063	3.83	1.53	3.44	3.23	2.77	3.48	2.21	2.98	1.3	1.77	1.66	1.91
ENSG00000280069.1	AC127024.8	-1.21822	-0.284773	0.112272	0.181253	-0.94973	-1.30107	-0.3797	0.0378162	0.0848544	-1.42232	2.86	3.21	4.15	4.77	3.03	3.55	2.82	2.19	2.9	2.76	1.98	2.64
ENSG00000278949.1	AC127070.4	2.17625	1.12184	0.00222868	0.00737926	2.65195	1.63686	0.710928	0.0369894	0.0834322	1.43192	0.21	0.12	0.32	0.38	0.63	0.47	0.46	0.44	0.3	0.4	0.29	0.31
ENSG00000260566.2	AC127459.1	2.57285	1.36337	0.0237732	0.0509412	1.62391	2.51037	1.3279	0.0385608	0.0861143	1.41385	0.22	0.45	0.51	0.06	0.53	0.83	0.48	0.79	0.64	0.4	0.41	0.81
ENSG00000280351.2	AC127496.7	1.06547	0.0914942	0.657466	0.739957	0.182127	1.18226	0.241545	0.167424	0.271491	0.776183	0.61	0.58	0.6	0.6	0.71	0.45	0.75	0.56	0.62	0.78	0.52	0.59
ENSG00000270055.1	AC127502.2	-1.05235	-0.0736145	0.663231	0.744635	-0.178335	-1.02373	-0.033832	0.749741	0.820661	-0.125089	1.12	1.14	1.11	1.36	1.33	1.12	0.76	1.23	1.07	1.11	0.9	0.98
ENSG00000262823.1	AC127521.1	-1.60546	-0.682988	0.116235	0.186292	-0.934665	1.24287	0.313675	0.299263	0.421176	0.523947	1.09	1.03	0.61	0.62	0.77	0.41	0.71	0.21	0.85	0.98	0.81	0.88
ENSG00000179094.16	AC129492.1	1.2709	0.345846	0.0560883	0.102785	1.25113	-1.24458	-0.315656	0.0903008	0.168545	-1.04431	2.21	2.76	3.21	4.15	3.33	4.54	4.36	2.77	1.85	2.08	2.46	1.94
ENSG00000214999.3	AC129492.2	1.48255	0.568076	0.054746	0.100776	1.26165	1.28701	0.364029	0.151266	0.251304	0.820257	0.59	0.53	0.53	0.39	0.84	0.49	0.78	0.84	0.53	0.49	0.75	0.52
ENSG00000280321.1	AC129502.1	-1.03086	-0.0438549	0.9126	0.937676	-0.0397197	-1.40485	-0.490419	0.207801	0.319349	-0.682353	0.29	0.38	0.9	0.76	0.72	0.66	0.23	0.54	0.51	0.2	0.22	0.38
ENSG00000275185.1	AC130324.3	-1.27247	-0.347629	0.0266565	0.0559496	-1.5742	-1.85902	-0.89454	0.00075971	0.00393779	-3.11935	3.87	4.31	5.86	4.99	3.74	3.46	3.63	3.54	2.79	1.6	2.36	2.29
ENSG00000276564.1	AC130650.2	-1.04938	-0.0695393	0.8441	0.885673	-0.0736062	-1.06151	-0.0861184	0.819317	0.875573	-0.0865483	0.59	0.71	1.72	1.38	1.33	1.32	0.74	0.55	1.17	0.74	0.46	1.19
ENSG00000273568.1	AC131009.3	1.22598	0.293931	0.200091	0.28856	0.698773	-1.12444	-0.169203	0.564867	0.670478	-0.248054	4.67	4.68	3.64	6.28	6.44	5	5.28	6.23	2.09	3.51	3.81	5.19
ENSG00000279283.1	AC131009.4	1.06765	0.0944323	0.74266	0.807863	0.12921	-1.01076	-0.0154373	0.960204	0.974772	-0.0176363	0.33	0.56	0.32	0.68	0.43	0.52	0.34	0.56	0.28	0.54	0.39	0.32
ENSG00000283765.1	AC131160.1	-1.06382	-0.0892504	0.537379	0.63347	-0.269719	1.07073	0.0985962	0.459593	0.575373	0.337626	4.57	5.66	4.39	4.05	4.09	3.33	4.48	4.5	4.65	3.88	4.91	5.1
ENSG00000279700.1	AC131212.2	1.01808	0.0258577	0.95066	0.965509	0.0219746	-1.02449	-0.0349094	0.929098	0.954893	-0.0319385	0.21	0.39	0.6	0.93	0.77	0.54	0.29	0.3	0.42	0.28	0.28	0.47
ENSG00000280287.1	AC131212.3	-1.11428	-0.156112	0.684167	0.761539	-0.164838	-1.04773	-0.0672651	0.832916	0.886227	-0.0793989	0.24	0.38	0.55	0.98	0.68	0.51	0.29	0.27	0.4	0.37	0.33	0.47
ENSG00000228205.1	AC131235.1	1.07705	0.107085	0.515602	0.612453	0.287686	1.05154	0.072506	0.646188	0.738501	0.189641	5.55	7.04	6.26	4.78	6.46	5.68	6.99	5.25	5.6	6.45	4.89	5.39
ENSG00000248964.6	AC131254.1	1.842	0.881275	0.00194075	0.00659309	2.71203	2.06039	1.04292	0.00102407	0.00494774	2.98967	0.2	0.29	0.35	0.24	0.46	0.46	0.59	0.4	0.45	0.59	0.32	0.42
ENSG00000198237.8	AC131392.1	-1.14516	-0.195547	0.201782	0.290715	-0.695118	-1.16558	-0.221044	0.108997	0.195369	-0.962585	7.2	9.31	10.9	11.53	9.83	7.04	8.07	7.31	7.79	7.18	7.02	7.7
ENSG00000279662.1	AC131649.2	1.39278	0.477965	0.157966	0.238318	0.801436	-1.08027	-0.111395	0.725814	0.801714	-0.139175	0.24	0.16	0.46	0.38	0.52	0.49	0.25	0.36	0.34	0.22	0.18	0.2
ENSG00000214135.8	AC132008.2	-1.1182	-0.161184	0.0353415	0.0705601	-1.45172	1.00524	0.00754311	0.900552	0.935231	0.0454912	9.9	10.03	10.11	11.84	9.44	8.8	8.18	8.99	9.61	9.76	9.5	10.11
ENSG00000279757.1	AC132068.1	-1.81657	-0.861219	0.00358748	0.0107884	-2.44521	-1.14536	-0.195805	0.317782	0.440283	-0.497871	1.89	2.23	2.53	2.94	1.18	1.87	0.8	1.2	1.52	2.28	1.58	1.83
ENSG00000268403.2	AC132192.2	-1.2389	-0.309061	0.049502	0.0930339	-1.30538	-1.3782	-0.462782	0.00874038	0.0267258	-2.05847	3.5	3.23	2.6	3.32	2.4	2.54	2.55	2.32	2.21	2.04	1.82	2.08
ENSG00000260563.3	AC132872.1	1.07194	0.100218	0.674024	0.753669	0.171325	-1.72193	-0.784023	0.0259868	0.0630718	-1.58525	0.42	0.45	0.52	0.92	0.77	0.57	0.46	0.51	0.25	0.27	0.35	0.16
ENSG00000279744.1	AC132938.5	-1.01177	-0.0168799	0.922184	0.944251	-0.0351822	-1.03715	-0.0526288	0.655237	0.745645	-0.183602	1.16	1.34	1.43	1.32	1.84	1.21	1.21	0.94	1.09	1.22	1.14	1.02
ENSG00000244245.1	AC133134.1	1.49466	0.579822	0.00178299	0.00616978	2.74885	1.4089	0.494566	0.00504204	0.0174114	2.29739	60.36	73.87	68.32	45.45	90.69	89.3	93.46	79.67	82.05	91.31	82.84	74.5
ENSG00000233597.3	AC133435.1	1.03413	0.0484192	0.817606	0.865532	0.087456	1.21271	0.278237	0.328292	0.450763	0.48374	1.73	1.43	1.19	1.71	1.82	1.47	1.31	1.33	2.05	1.04	1.3	1.9
ENSG00000236489.1	AC133473.1	-1.25007	-0.322006	0.303429	0.403385	-0.517943	-1.1927	-0.254229	0.426507	0.545787	-0.370074	3.75	6.93	5.45	3.59	5.61	3.79	3.74	2.35	5.2	2.28	3.89	2.91
ENSG00000284879.1	AC133644.3	-1.09134	-0.126094	0.126413	0.199566	-0.898208	1.22128	0.288391	0.00197288	0.00830925	2.7049	2.9	3.15	2.99	2.95	2.67	2.58	2.3	2.65	3.17	3.43	3.52	3.37
ENSG00000256712.1	AC134349.1	-1.15196	-0.204089	0.242652	0.337032	-0.615015	-1.69414	-0.76055	0.00048323	0.00277979	-3.31585	10.1	8.84	11.1	13.72	10.5	11.67	8.19	7.29	5.26	6.07	5.09	6.45
ENSG00000256981.1	AC134349.2	1.0541	0.0760102	0.579864	0.671908	0.236674	-1.68167	-0.749891	0.00050451	0.00286713	-3.29713	2.92	2.64	3.85	3.45	3.59	3.79	2.62	3.16	1.79	1.99	1.4	1.52
ENSG00000279880.1	AC134407.3	1.12643	0.171756	0.480761	0.579901	0.318071	-1.10868	-0.148849	0.560341	0.666565	-0.251548	0.33	0.36	0.59	0.86	0.57	0.56	0.56	0.42	0.41	0.36	0.42	0.32
ENSG00000262766.1	AC135050.5	1.11592	0.15824	0.491276	0.590297	0.308675	1.16239	0.217089	0.342942	0.465682	0.464779	3.25	2.74	2.27	2.28	2.9	3.62	3.07	2.07	3.41	2.66	2.07	2.95
ENSG00000278133.1	AC135050.6	1.03297	0.046801	0.701268	0.775245	0.154116	1.12644	0.171767	0.16662	0.270407	0.778272	9.3	10.6	12.89	11.83	10.54	12.42	12.62	9.95	10.1	11.76	11.41	11.91
ENSG00000251468.2	AC135352.1	1.58346	0.663078	0.0373824	0.0738841	1.42733	-1.19963	-0.262594	0.412843	0.53351	-0.384215	0.41	0.47	0.26	0.48	0.88	0.59	0.61	0.44	0.25	0.38	0.23	0.21
ENSG00000256982.1	AC135782.1	-1.5176	-0.601793	0.0839763	0.143002	-1.07584	1.49537	0.580507	0.0935672	0.173086	1.02888	0.26	0.16	0.2	0.37	0.15	0.09	0.14	0.18	0.27	0.44	0.19	0.31
ENSG00000223509.8	AC135983.2	1.1271	0.172621	0.0614134	0.110778	1.21174	-1.01004	-0.0144155	0.863144	0.908178	-0.0639166	18.23	11.68	10.99	16.63	15.36	16.24	13	12.87	9.56	12.25	9.59	15.91
ENSG00000255026.1	AC136475.3	-1.36955	-0.4537	0.0123193	0.0297837	-1.90941	-1.2612	-0.334803	0.0424462	0.0927956	-1.37216	4.63	3.89	5.99	4.96	3.62	4.16	3.61	2.88	2.65	2.67	3.22	4.63
ENSG00000218227.3	AC136632.1	-1.1738	-0.231191	0.10696	0.174032	-0.970778	-1.13338	-0.180636	0.247534	0.36535	-0.606365	9.57	12.57	10.77	9.21	8.91	8.55	8.97	7.8	7.08	10.19	8.43	8.19
ENSG00000238035.8	AC138035.1	-1.42061	-0.506515	0.0379462	0.0747793	-1.42083	1.13646	0.184552	0.298184	0.420211	0.525516	1.7	1.69	1.8	1.6	1.76	1.39	0.8	0.83	1.38	2.04	1.36	2.02
ENSG00000267288.2	AC138150.2	-1.83508	-0.875842	0.000152722	0.000867317	-3.8161	-1.87994	-0.910687	0.000263147	0.00174979	-3.5798	1.28	1.42	1.38	1.78	0.73	1.03	0.75	0.83	1.22	0.85	0.65	0.66
ENSG00000264456.1	AC138207.4	-1.09903	-0.136235	0.415714	0.517835	-0.381206	-1.28176	-0.35813	0.0449792	0.0972301	-1.34699	0.81	0.81	1.2	1.16	1.16	0.88	0.72	0.74	0.77	0.72	0.53	0.66
ENSG00000185495.10	AC138393.1	1.06083	0.0851952	0.473641	0.573705	0.324551	-1.0528	-0.0742253	0.466424	0.581784	-0.331219	2.02	2.21	2.41	3.08	2.68	2.22	2.01	2.82	1.79	2.06	2.34	2.21
ENSG00000278467.1	AC138393.3	1.56062	0.642123	0.0228005	0.0492152	1.64206	1.1913	0.252537	0.313311	0.435845	0.504024	1.01	1.82	1.83	2.51	2.12	2.51	2.95	2.77	1.62	2.16	1.95	1.45
ENSG00000215158.9	AC138409.2	-1.2224	-0.289719	0.111257	0.179867	-0.953672	-1.34541	-0.428049	0.0167206	0.0445512	-1.77675	15.24	15.61	25.42	18.78	17.1	14.54	12.76	11.59	14.93	14.02	9.2	16.02
ENSG00000279103.1	AC138470.1	1.22879	0.297233	0.179529	0.264202	0.745866	1.26025	0.33371	0.188935	0.296832	0.723687	0.31	0.33	0.59	0.58	0.51	0.64	0.5	0.41	0.37	0.46	0.64	0.43
ENSG00000235760.4	AC138655.1	-1.73291	-0.793196	0.427924	0.529244	-0.368634	1.3467	0.429427	0.627912	0.722727	0.202101	0.08	0.56	0.86	1.28	0.53	0.53	0.3	0.11	0.36	0.57	0.62	0.69
ENSG00000253816.3	AC138866.1	-1.34008	-0.422323	0.0437277	0.0840151	-1.35924	-1.65673	-0.72834	0.00936033	0.0282168	-2.02871	31.41	22.6	34.18	36.58	22.89	28.74	16.71	20.54	23.63	16.83	10.69	19.58
ENSG00000254701.3	AC138866.2	-1.45267	-0.538705	0.0489302	0.0921284	-1.31042	-1.06884	-0.0960485	0.710477	0.789134	-0.14845	10.45	12.18	20.86	20.53	9.95	7.56	11.93	11.34	11.19	13.08	19.4	10.51
ENSG00000261832.6	AC138894.1	-1.26079	-0.33433	0.0680644	0.12048	-1.16708	1.13291	0.180039	0.090501	0.168879	1.04335	3.19	2.91	2.69	3.45	2.64	2.22	2.79	1.66	3.15	2.93	3.45	3.03
ENSG00000183458.13	AC138932.1	1.15007	0.201721	0.475185	0.575003	0.323138	1.06699	0.0935426	0.701188	0.782185	0.154165	0.77	0.56	1.31	0.97	1.26	0.67	1.14	0.56	1.51	0.61	0.67	0.68
ENSG00000279107.1	AC138951.2	-1.15379	-0.206378	0.291294	0.39007	-0.535668	-1.28002	-0.356167	0.125252	0.218053	-0.902214	1.26	1.61	2.59	2.23	1.54	1.86	1.42	1.45	1.73	1.09	1.12	1.24
ENSG00000183889.12	AC138969.1	1.12312	0.167517	0.255415	0.351173	0.592754	1.14024	0.189339	0.173391	0.278709	0.760972	35.43	27.09	28.55	36.61	43.11	38.91	27.48	27.7	39.41	38.34	33.86	24.13
ENSG00000278000.1	AC139100.2	1.80642	0.85313	0.00347187	0.0105307	2.45944	1.32432	0.405247	0.0800414	0.153094	1.09669	1.36	2.23	1.65	2.56	3.87	4.43	2.51	2.98	2.38	1.71	2.35	2.43
ENSG00000270580.5	AC139256.2	-1.05625	-0.0789496	0.768723	0.828654	-0.11423	-1.53704	-0.620156	0.0244366	0.0602024	-1.61196	0.36	0.89	0.64	0.71	0.47	0.72	0.71	0.56	0.55	0.55	0.45	0.28
ENSG00000253366.3	AC139272.1	-5.9625	-2.57592	0.188281	0.274536	-0.725194	-10.2303	-3.35478	0.0470584	0.100623	-1.32736	3.02	1.5	1.12	0	0	2.02	0	0	0	0	0	0
ENSG00000262049.1	AC139530.2	-1.47308	-0.558835	0.00044288	0.00200972	-3.35371	-1.23384	-0.303157	0.0136554	0.0380118	-1.86469	1.37	1.51	1.55	1.85	1.07	1.03	1.07	0.91	1.03	1.19	1.13	1.11
ENSG00000184271.17	AC139768.1	-1.39161	-0.476758	0.139472	0.215929	-0.855514	1.18465	0.244461	0.270706	0.39068	0.567503	0.78	1.24	1.49	1.1	0.55	0.16	0.42	0.32	0.83	1.41	0.5	0.38
ENSG00000278900.1	AC139792.2	-2.06563	-1.04658	0.00883546	0.0226221	-2.05377	-1.43678	-0.522839	0.0312912	0.0730715	-1.50458	1.28	1.26	1.74	1.59	0.67	0.83	0.3	1.09	0.9	0.88	0.57	1.05
ENSG00000246596.7	AC139795.1	1.39997	0.485396	0.000221232	0.0011626	3.65515	-1.03711	-0.0525644	0.610908	0.709217	-0.214024	3.32	3.03	3.58	4.09	4.58	5.06	4.21	4.03	2.84	3.18	2.21	3.05
ENSG00000249592.5	AC139887.2	-1.15635	-0.209582	0.153119	0.232086	-0.814972	-1.48062	-0.566202	0.0036213	0.0134119	-2.44114	5.22	5.75	8.17	7.4	5.7	5.02	5.3	6.27	3.95	4.84	3.43	3.65
ENSG00000179978.11	AC140134.1	-1.33196	-0.413549	0.112105	0.181038	-0.950377	-1.49115	-0.576425	0.05783	0.118324	-1.23785	1.06	0.87	2.09	1.93	1.01	1.02	0.98	0.89	1.05	0.67	0.67	0.93
ENSG00000230650.1	AC140479.2	-1.01714	-0.0245183	0.885646	0.917376	-0.0527397	1.51619	0.600452	0.0160318	0.043053	1.79502	0.3	0.32	0.29	0.42	0.32	0.27	0.33	0.3	0.42	0.31	0.47	0.57
ENSG00000282304.1	AC140479.5	-1.24953	-0.321382	0.360843	0.463388	-0.442682	-3.27525	-1.71161	0.0365537	0.0826242	-1.43707	0.84	1.52	0.71	1.23	0.94	1.24	0.42	0.77	0.47	0	0.26	0.62
ENSG00000283167.2	AC140479.7	1.30923	0.388724	0.633837	0.720121	0.198023	1.48197	0.567519	0.491578	0.605508	0.308408	0.08	0.02	0.17	0.2	0.11	0.05	0.08	0.08	0.08	0.09	0.05	0.1
ENSG00000215154.6	AC141586.1	-1.04354	-0.0614918	0.69308	0.768562	-0.159216	-1.14364	-0.19363	0.207731	0.319272	-0.682499	2.89	2.87	4.09	4.91	3.46	3.65	2.97	2.89	2.99	2.91	2.79	2.77
ENSG00000277304.1	AC142086.6	-1.24657	-0.317968	0.0929008	0.155196	-1.03198	-1.83738	-0.877652	0.00121076	0.0056434	-2.91694	0.9	0.94	1.3	1.71	0.91	0.91	0.81	0.99	0.42	0.57	0.64	0.57
ENSG00000260628.5	AC142381.3	-1.66724	-0.73746	0.0303759	0.0623262	-1.51747	-1.57828	-0.658351	0.0162453	0.043524	-1.78927	1.08	1.42	1.03	1.31	1.18	1.31	0.59	0.4	0.47	0.51	0.47	0.77
ENSG00000276728.1	AC142472.1	-1.2413	-0.311847	0.0499944	0.0937851	-1.30108	-1.61084	-0.687815	0.00311979	0.0118875	-2.50587	0.65	0.8	0.85	0.8	0.62	0.54	0.61	0.59	0.43	0.33	0.36	0.56
ENSG00000258210.1	AC144548.1	1.21963	0.286448	0.437553	0.538452	0.35897	1.18544	0.245427	0.51991	0.630885	0.284072	0.81	0.87	0.37	0.96	0.67	1.32	0.66	0.75	0.45	0.92	0.72	0.74
ENSG00000273117.1	AC144652.1	-2.0082	-1.0059	0.00204584	0.00689601	-2.68913	-1.10506	-0.14413	0.505155	0.61757	-0.296575	1.63	1.75	1.09	1.24	0.69	0.61	0.66	0.72	1	1.14	1.24	1.13
ENSG00000279821.1	AC145098.2	1.52245	0.606399	0.000158274	0.000893211	3.80059	-1.2669	-0.3413	0.0179707	0.0471668	-1.74544	0.61	0.68	0.79	0.82	1.2	0.99	0.99	1.06	0.48	0.47	0.46	0.6
ENSG00000255495.1	AC145124.1	1.07204	0.100362	0.514328	0.611281	0.28876	1.27958	0.355667	0.0462087	0.0992039	1.33528	1.02	1.49	1.35	1.72	1.46	1.34	1.43	1.5	1.9	1.53	1.38	1.45
ENSG00000251634.2	AC145138.1	-1.19075	-0.251875	0.305803	0.406007	-0.514559	-1.81186	-0.857474	0.0114868	0.0332483	-1.9398	0.78	0.8	1.47	1.16	1.17	1.06	0.63	0.6	0.67	0.27	0.57	0.53
ENSG00000263731.1	AC145207.5	-1.31628	-0.396468	0.00013246	0.000776104	-3.87791	-1.02773	-0.0394658	0.504989	0.617509	-0.296718	6.93	7.47	6.81	7.42	5.25	5.13	4.77	5.44	6.31	6.68	6.72	6.38
ENSG00000278112.1	AC145423.3	-1.50748	-0.592135	0.132519	0.207367	-0.877721	-1.268	-0.342555	0.342368	0.465047	-0.465506	0.96	1.69	2.15	3.5	1.47	1.71	0.69	0.98	1.38	0.96	0.9	1.59
ENSG00000240729.1	AC146507.2	1.54886	0.631207	0.00980438	0.0246802	2.00858	1.11966	0.163063	0.401107	0.522566	0.39674	1.44	1.28	1.99	1.85	2.94	3	1.85	2.46	1.43	1.49	1.49	1.91
ENSG00000196302.5	AC146944.1	-2.87594	-1.52403	0.102829	0.168752	-0.987883	-3.1882	-1.67274	0.0386619	0.086307	-1.41272	1.51	1.81	4.72	3.64	2.99	0	1.92	0.8	0	0.64	0.98	1.86
ENSG00000269983.1	AC146944.4	-1.4685	-0.554342	0.0312016	0.0636986	-1.50582	-1.24176	-0.312389	0.174441	0.280058	-0.758352	1.47	1.17	1.37	1.54	0.93	0.64	0.9	1.16	0.75	1.09	0.75	1.31
ENSG00000256546.1	AC156455.1	2.19101	1.1316	0.000513411	0.00225519	3.28953	1.17122	0.228011	0.33835	0.460932	0.470634	2.96	1.15	1.75	2.34	4.24	3.32	4.65	4.06	2.51	1.93	2.27	2.5
ENSG00000277701.4	AC159540.2	1.3028	0.381615	0.137349	0.213213	0.862176	-1.06355	-0.0888848	0.501093	0.613864	-0.300082	1.53	1.37	1.95	1.75	2.62	3.18	2.79	1.76	1.48	1.61	1.29	1.04
ENSG00000285702.1	AC211476.5	-1.59062	-0.669591	0.00779579	0.020454	-2.10814	-1.06167	-0.0863388	0.578794	0.682743	-0.237476	2.72	2.83	3.7	4.73	2.17	2.27	2.58	1.4	2.65	3.08	2.53	3.17
ENSG00000146722.11	AC211486.1	-1.9168	-0.938697	0.00814392	0.0211991	-2.08917	-1.34641	-0.429119	0.120398	0.211529	-0.919381	1.56	2.13	1.21	1.2	0.58	0.77	0.72	0.77	1.01	0.76	1.21	0.84
ENSG00000273598.1	AC211486.3	-3.00197	-1.58591	0.00404918	0.0118876	-2.39263	-1.19503	-0.257044	0.300107	0.422103	-0.522724	1.45	1.48	3	1.62	0.91	0.48	0.17	1	1.02	1.33	1.2	1.65
ENSG00000282572.2	AC215522.2	-1.36652	-0.450503	0.284022	0.382515	-0.546648	-1.55943	-0.641019	0.0922721	0.171245	-1.03493	2.26	2.48	5.39	6.66	4.47	3.4	1.83	1.75	2.3	2.24	1.9	2.15
ENSG00000270012.1	AC232271.1	-1.04604	-0.0649351	0.686394	0.763231	-0.163427	-1.0665	-0.0928879	0.586363	0.688387	-0.231834	1.39	1.28	1.4	0.98	1.26	1.23	1.02	1.12	1.07	1.24	0.94	0.97
ENSG00000286181.1	AC232271.3	1.25209	0.324336	0.0162556	0.0373909	1.789	1.36839	0.452479	0.00234864	0.00953769	2.62918	0.45	0.66	0.75	0.63	0.86	1	0.8	0.65	0.77	0.94	0.87	0.76
ENSG00000229178.1	AC233280.1	-1.30323	-0.382097	0.188936	0.275294	-0.723685	-1.05758	-0.0807652	0.746108	0.817467	-0.127198	0.44	0.27	0.33	0.31	0.32	0.2	0.18	0.29	0.29	0.22	0.27	0.25
ENSG00000261499.2	AC233699.1	-1.77668	-0.829181	0.0753057	0.130728	-1.12317	-1.8114	-0.857103	0.320287	0.442912	-0.49446	0.18	0.62	0.72	0.36	0.29	0.19	0.15	0.17	0	0.65	0.21	0.23
ENSG00000274615.1	AC233968.1	-1.56315	-0.64446	0.0929544	0.155255	-1.03173	-2.60944	-1.38374	0.0137216	0.038156	-1.8626	0.58	0.74	1.43	1.74	0.44	0.67	0.54	0.89	0.78	0.1	0.36	0.25
ENSG00000179304.16	AC234031.1	1.08825	0.122013	0.223098	0.315062	0.651504	1.11704	0.159678	0.234197	0.350452	0.630418	5.46	4.79	4.5	4.69	5.78	4.11	4.67	4.28	5.37	5.84	4.39	5.89
ENSG00000269902.1	AC234772.2	1.3322	0.413806	0.0781845	0.134913	1.10688	1.40121	0.486668	0.0391571	0.087224	1.40719	3.16	4.26	4.48	7.21	7.35	6.77	4.64	5.28	6.3	6.42	4.39	6
ENSG00000237682.2	AC234775.2	1.13719	0.185467	0.412165	0.514501	0.384929	-1.03243	-0.0460466	0.810696	0.869177	-0.091142	0.48	0.4	0.5	0.43	0.41	0.45	0.5	0.63	0.29	0.36	0.41	0.44
ENSG00000261101.2	AC234775.3	1.03618	0.051271	0.892113	0.921656	0.0495802	1.39264	0.477823	0.234828	0.351199	0.629251	1.2	0.51	1.43	0.65	0.7	0.9	0.73	1.16	1.35	0.69	0.81	1.29
ENSG00000286019.1	AC239811.1	1.01596	0.0228495	0.862478	0.899187	0.0642522	-1.06607	-0.0923038	0.538647	0.64777	-0.268696	2.11	2.61	2.8	3.6	2.95	2.5	2.49	2.73	2.17	2.75	2.09	2.07
ENSG00000261716.2	AC239868.1	1.42291	0.508843	0.000165201	0.000922969	3.78199	-1.32532	-0.406337	0.0018002	0.00772886	-2.74468	0.73	0.83	0.97	1.03	1.24	1.18	1.1	1.24	0.66	0.57	0.56	0.61
ENSG00000264207.1	AC239868.2	-1.19238	-0.253838	0.216665	0.307748	-0.664212	-1.72374	-0.785539	0.0255147	0.0622747	-1.59321	1.66	1.17	1.12	1.54	1.09	1.15	0.95	1.22	0.79	0.36	1.07	0.65
ENSG00000280279.1	AC240565.2	-1.44958	-0.535636	0.100921	0.166244	-0.996018	-1.32574	-0.406794	0.224124	0.339187	-0.649512	0.51	0.79	0.96	1.73	0.57	0.82	0.55	0.49	0.87	0.48	0.46	0.64
ENSG00000223612.3	AC241585.1	1.17966	0.23837	0.0933672	0.155846	1.02981	1.16672	0.222455	0.0924404	0.171477	1.03414	4.2	4.04	4.8	4.81	5.06	4.96	5.92	4.67	4.2	4.71	5.19	4.56
ENSG00000281571.2	AC241585.2	-1.1631	-0.217976	0.388454	0.490866	-0.41066	-1.21625	-0.282434	0.327477	0.450225	-0.484819	1.05	1.31	0.81	1.06	0.69	1.06	1.01	0.7	0.72	0.45	0.77	1.1
ENSG00000275131.3	AC241952.1	1.11391	0.155634	0.19018	0.276758	0.720835	1.1155	0.157695	0.182142	0.288626	0.73959	1.97	1.93	2.6	2.75	2.79	2.49	2.34	2.32	2.85	2.24	2.14	2.52
ENSG00000237188.5	AC242426.2	1.39384	0.479061	0.0276457	0.0576373	1.55837	1.14372	0.193735	0.432024	0.550468	0.364492	2.77	3.2	2.44	2.94	4.29	4.45	4.8	4.14	3	3.39	2.76	1.67
ENSG00000286185.1	AC242842.3	1.40855	0.494214	0.0652033	0.116472	1.18573	1.08432	0.116785	0.572631	0.676881	0.242125	0.09	0.08	0.08	0.07	0.18	0.13	0.08	0.09	0.07	0.09	0.06	0.1
ENSG00000286219.1	AC242843.1	1.048	0.0676436	0.71044	0.782553	0.148472	-1.14339	-0.193321	0.230061	0.345816	-0.638157	4.87	5.47	7.22	9.03	7.59	7.2	5.48	5.88	5.7	5.01	5.08	5.49
ENSG00000268034.1	AC243960.2	1.07285	0.101453	0.613684	0.703345	0.212055	-1.06378	-0.089199	0.681207	0.765986	-0.166721	4.77	7.1	7.2	4.28	5.85	5.45	6.74	5.41	3.68	5.58	4.98	5.18
ENSG00000285184.2	AC244033.2	1.49046	0.575762	0.00712193	0.0190032	2.1474	1.14042	0.189561	0.32971	0.452051	0.481868	0.43	0.43	0.46	0.38	0.61	0.62	0.61	0.77	0.57	0.41	0.37	0.42
ENSG00000234981.1	AC244034.1	1.31073	0.390368	0.105112	0.171689	0.978347	1.29019	0.367578	0.0381958	0.0854901	1.41798	1.15	1.46	1.44	1.18	2.07	1.62	2.05	1.09	1.4	1.43	1.46	1.67
ENSG00000279946.1	AC244034.3	1.47183	0.557613	0.0890716	0.150006	1.05026	-1.55418	-0.636151	0.0157523	0.0424664	-1.80266	0.28	0.36	0.38	0.52	0.81	0.81	0.38	0.34	0.19	0.27	0.24	0.15
ENSG00000274308.1	AC244093.1	1.01325	0.01899	0.948596	0.963796	0.0229189	-1.27111	-0.34609	0.186279	0.293726	-0.729836	0.81	0.63	1.3	1.47	1.33	1.39	0.66	0.74	0.62	0.69	0.61	0.67
ENSG00000277579.1	AC244093.3	-1.3625	-0.446261	0.339675	0.442168	-0.468936	-1.18368	-0.243281	0.58448	0.687229	-0.233231	0.72	1.87	2.28	2.48	1.56	0.53	1.19	1.34	1.1	0.96	0.79	1.05
ENSG00000277589.1	AC244093.4	-1.31231	-0.392114	0.14273	0.219859	-0.845485	-1.29117	-0.368675	0.175416	0.281136	-0.755931	1.85	1.26	2.95	2.57	1.71	1.67	1.12	1.56	1.84	1.25	1.26	1.2
ENSG00000276170.4	AC244153.1	-1.36381	-0.447645	0.0105057	0.0261126	-1.97858	-1.85788	-0.893656	0.000178442	0.00130901	-3.7485	20.17	18.4	14.66	13.76	11.21	11.77	12.55	11.8	8.49	9.04	9.72	7.45
ENSG00000274487.2	AC244154.1	-1.33814	-0.420227	0.062877	0.112903	-1.20151	-1.50241	-0.587277	0.0130451	0.0367541	-1.88455	2.35	2.66	3.67	4.91	3.01	2.16	2.35	1.82	1.99	2.01	2.15	1.62
ENSG00000241489.8	AC244197.3	-1.09771	-0.134498	0.519706	0.616135	-0.284242	-1.59635	-0.674773	0.00946044	0.0284586	-2.02409	2.45	1.94	2.88	3.84	3.21	2.26	2.37	2.07	1.67	1.49	1.64	1.35
ENSG00000279458.2	AC244230.1	-1.18474	-0.244565	0.388585	0.490992	-0.410514	1.09533	0.131368	0.592969	0.694351	0.226968	10.1	5.38	9.7	10.84	10.33	9.51	5.86	4.76	7.41	10.04	9.52	8.12
ENSG00000223804.5	AC244669.1	1.06086	0.0852288	0.559631	0.653798	0.252098	1.14221	0.191822	0.136926	0.233309	0.863513	4.02	4.68	4.87	3.95	4.7	4.31	3.55	5.29	4.44	3.93	4.29	4.86
ENSG00000276216.1	AC245014.3	2.63729	1.39906	8.87e-06	0.000104016	5.05229	1.20065	0.263821	0.137623	0.234235	0.861308	43.01	40.86	27.47	26.65	79.15	77.51	93.23	96.48	39.07	34.12	38.39	39.55
ENSG00000273760.1	AC245041.1	1.02571	0.0366206	0.84315	0.885078	0.0740951	-1.04716	-0.0664853	0.645038	0.737248	-0.190415	7.29	8.21	11.43	11.48	11.38	11.26	7.18	7.58	9.23	7.18	8.54	7.6
ENSG00000276850.4	AC245041.2	1.20792	0.272527	0.00059618	0.00254287	3.22462	1.00367	0.00528312	0.921669	0.949828	0.035425	15.33	17.8	17.5	17.42	19.75	22.25	18.94	19.66	16.09	17.87	17.62	18.57
ENSG00000272779.1	AC245060.4	-1.22303	-0.290459	0.012586	0.0303153	-1.90011	-1.16305	-0.217915	0.0275403	0.0660406	-1.56003	22.19	22.83	21.41	18.21	15.18	16.44	17.22	17.01	17.4	17.38	16.81	16.95
ENSG00000274422.1	AC245060.5	-1.18438	-0.244137	0.458786	0.559227	-0.33839	-2.02011	-1.01443	0.00490662	0.0170394	-2.30922	1.09	1.22	2.42	2.52	1.76	2.09	1	0.88	0.94	0.57	0.75	0.72
ENSG00000286129.1	AC245060.7	1.04568	0.0644438	0.454284	0.554908	0.342673	1.04095	0.0579054	0.494028	0.607637	0.306249	5.28	5.68	5.18	4.61	5.09	5.12	5.06	5.14	4.89	5.04	5.04	5.16
ENSG00000225871.2	AC245100.2	1.49335	0.578551	0.0268755	0.0563218	1.57064	1.68695	0.75442	0.00663955	0.0215482	2.17786	0.27	0.21	0.21	0.31	0.33	0.41	0.31	0.39	0.31	0.34	0.33	0.39
ENSG00000280649.2	AC245100.8	-1.57403	-0.654466	0.0434125	0.0835186	-1.36238	-1.7919	-0.841489	0.00383022	0.0140092	-2.41678	1.93	1.71	1.56	1.22	0.99	0.64	0.97	1.4	0.8	0.8	0.64	0.87
ENSG00000280195.1	AC245140.2	-1.28489	-0.361641	0.0843771	0.143583	-1.07378	-1.48774	-0.573122	0.0171459	0.0454346	-1.76584	0.67	0.67	0.64	0.55	0.55	0.38	0.51	0.45	0.35	0.33	0.48	0.33
ENSG00000274265.4	AC245297.3	-1.15728	-0.210734	0.371829	0.474421	-0.429656	-1.33004	-0.411473	0.060393	0.122502	-1.21901	7.7	10.1	15.34	13.53	11.52	12.16	7.04	7.79	7.98	7.33	6.38	8.09
ENSG00000224086.5	AC245452.1	1.04285	0.0605333	0.634306	0.720553	0.197701	1.01785	0.0255224	0.888263	0.926078	0.0514584	0.07	0.07	0.06	0.07	0.06	0.08	0.07	0.06	0.09	0.05	0.05	0.05
ENSG00000269873.1	AC245884.10	-1.28848	-0.365669	0.262317	0.358805	-0.581173	-1.03952	-0.0559144	0.859924	0.905863	-0.06554	2.15	2.92	4.41	6.36	2.07	2.92	2.71	3.24	4.16	2.45	2.65	2.75
ENSG00000267838.2	AC245884.8	-1.36622	-0.450192	0.237096	0.330791	-0.625075	-1.19234	-0.253792	0.424263	0.54396	-0.372365	1.08	1.3	2.49	3.64	2.07	1.48	0.84	1.18	1.47	1.37	1.17	1.44
ENSG00000225200.2	AC246787.1	1.14487	0.195182	0.382631	0.484908	0.41722	1.23713	0.306993	0.177724	0.283819	0.750254	2.69	2.4	1.65	2.06	2.85	2.05	2.31	2.66	2.57	2.65	1.96	2.56
ENSG00000286106.1	AC253572.1	1.1316	0.178361	0.57216	0.665076	0.242483	1.73079	0.791429	0.00436225	0.0155405	2.36029	0.61	0.54	0.75	0.63	0.98	0.67	0.36	0.94	1.21	0.69	1.02	0.91
ENSG00000060971.18	ACAA1	-1.13314	-0.180321	0.062543	0.112408	-1.20382	-1.07865	-0.109231	0.228978	0.344447	-0.640207	15.48	14.95	18.88	20.78	14.25	14.02	13.76	13.18	13.83	14.77	14.22	15.32
ENSG00000167315.18	ACAA2	-1.45857	-0.544559	0.00457835	0.0131247	-2.33929	-1.81386	-0.859067	7e-05	0.000649803	-4.15509	2.07	2.53	2.33	2.26	1.2	1.47	1.78	1.74	0.87	1	0.92	1.08
ENSG00000278540.5	ACACA	-1.15813	-0.211798	0.162021	0.243032	-0.790428	-1.42633	-0.512313	0.00134494	0.00612595	-2.8713	22.61	25.14	31.67	31.63	30.06	27.75	19.45	22.28	21.18	18.69	17.84	18.97
ENSG00000076555.15	ACACB	-1.28087	-0.357122	0.00757568	0.0199704	-2.12058	-1.60221	-0.680066	0.000155042	0.00117788	-3.80955	1.84	1.95	3.3	3.25	2.41	2.02	2.33	2.65	1.35	2	2.18	1.52
ENSG00000111271.14	ACAD10	1.16071	0.215011	0.0256291	0.0541654	1.59127	1.01361	0.0195081	0.827947	0.882143	0.0819976	4.55	3.49	5.31	5.67	5.1	5.02	3.87	4.49	3.59	4.77	3.54	4.94
ENSG00000240303.8	ACAD11	-1.05537	-0.0777493	0.440433	0.541339	-0.35612	1.13022	0.176599	0.0391218	0.0871722	1.40758	6.55	7.11	9.79	9.23	7.43	5.88	6.6	7.62	9.2	7.62	8.51	9.66
ENSG00000151498.11	ACAD8	-1.18154	-0.240663	0.00317991	0.00979191	-2.49759	-1.09037	-0.124819	0.102731	0.185929	-0.988299	6.29	6.05	6.2	5.98	5.21	5.01	5	4.96	5.82	4.66	5.27	5.49
ENSG00000177646.19	ACAD9	-1.17805	-0.236396	0.00106975	0.00404966	-2.97072	-1.02901	-0.0412603	0.373436	0.495477	-0.427784	36.73	37.38	39.48	37.26	30.22	31.26	31.44	32.4	35.95	33.63	36.19	36.46
ENSG00000117054.13	ACADM	-1.06215	-0.0869877	0.314505	0.415856	-0.502372	1.01243	0.0178209	0.825923	0.880544	0.0830604	21.4	19.71	20.43	18.18	17.22	17.29	18.63	19.08	19.2	17.14	19.06	20.24
ENSG00000122971.9	ACADS	1.01393	0.0199562	0.904085	0.930644	0.0437905	1.10275	0.141111	0.433272	0.551575	0.363239	1.03	0.79	0.97	0.88	1	0.85	0.98	0.71	0.89	1.06	0.96	0.72
ENSG00000196177.12	ACADSB	1.3583	0.441802	0.000374892	0.0017599	3.42609	1.22755	0.295784	0.00250699	0.0100531	2.60085	1.95	1.67	2.02	2.08	2.28	2.72	2.32	2.09	2.25	2.15	1.84	1.89
ENSG00000072778.20	ACADVL	1.12963	0.175848	0.0488213	0.0919574	1.31139	-1.25203	-0.324272	0.00139535	0.0063142	-2.85532	83.3	82.19	73.92	67.92	81.7	79.36	91.71	88.42	57.77	60.38	63.05	61.66
ENSG00000114331.14	ACAP2	-1.05158	-0.0725622	0.192474	0.279593	-0.715628	-1.02068	-0.0295257	0.55735	0.664069	-0.253872	28.83	26.26	29.28	29.09	27.79	28.71	24.39	26.3	26.53	23.43	23.89	24.77
ENSG00000229325.1	ACAP2-IT1	-1.05529	-0.0776393	0.710557	0.782598	-0.148401	-1.0633	-0.0885531	0.662498	0.751662	-0.178815	0.96	1.21	1.56	1.82	1.54	1.49	1.01	0.98	1.37	1.02	0.96	1.04
ENSG00000131584.19	ACAP3	1.13476	0.182393	0.0343249	0.0688923	1.46439	-1.14046	-0.189619	0.0248712	0.061082	-1.6043	4.42	4.02	5.3	4.4	4.87	4.61	4.42	4.25	3.4	4.26	3.71	3.66
ENSG00000075239.13	ACAT1	1.05533	0.077694	0.464354	0.564356	0.333151	1.05125	0.0720992	0.426999	0.546155	0.369573	30.52	28.3	27.26	24.54	25.71	25.53	28.95	29.3	28.59	27.18	29.24	26.63
ENSG00000120437.8	ACAT2	-1.05474	-0.0768884	0.484546	0.583509	-0.314665	1.15109	0.203001	0.0635226	0.127476	1.19707	106.33	105.23	86.16	79.91	77.61	82.31	90.41	93.44	102.48	105.77	107.5	103.75
ENSG00000182827.9	ACBD3	1.17208	0.229066	0.0343565	0.0689301	1.46399	-1.0488	-0.0687395	0.422803	0.543095	-0.373862	22.37	22.09	19.04	17.65	23.04	21.94	24.6	25.14	19.33	19.17	19.78	19.21
ENSG00000181513.14	ACBD4	-3.53841	-1.8231	3.59e-06	5.49e-05	-5.4453	-2.69408	-1.42979	1.46e-05	0.000205779	-4.83627	1.97	1.61	1.49	2.27	0.55	0.59	0.35	0.44	0.47	0.62	0.81	0.43
ENSG00000107897.19	ACBD5	1.20087	0.26408	0.0105359	0.0261757	1.97733	1.12834	0.174208	0.0540509	0.112433	1.2672	9.26	8.45	7.97	7.19	9.59	9.81	10.18	10.3	8.57	8.87	9.15	8.32
ENSG00000230124.8	ACBD6	1.1627	0.217478	0.00141796	0.0051109	2.84834	-1.15323	-0.205679	0.00101985	0.00493479	-2.99146	45.13	44.21	44.05	43.28	52.94	51.81	52.17	48.11	38.7	41.93	38.04	38.77
ENSG00000176244.7	ACBD7	-1.5624	-0.643767	0.0646791	0.115651	-1.18924	-1.19759	-0.260129	0.393439	0.514841	-0.405123	0.27	0.28	0.18	0.23	0.09	0.17	0.16	0.17	0.16	0.11	0.26	0.17
ENSG00000110455.13	ACCS	-1.06747	-0.0942004	0.4009	0.503601	-0.396964	-1.14634	-0.197039	0.0616098	0.124575	-1.21035	1.95	2.6	2.21	2.57	2.66	2.29	1.87	2.1	2.05	2.05	2.2	1.43
ENSG00000102977.15	ACD	-1.9086	-0.932515	2.52e-05	0.000221956	-4.59937	-1.01896	-0.0271037	0.795986	0.858008	-0.0990947	32.83	35.35	30.58	25.42	15.57	13.64	17.9	16.38	28	30.62	33.2	29.85
ENSG00000130234.10	ACE2	1.66586	0.736264	0.00114919	0.00429611	2.93961	1.01764	0.0252237	0.874448	0.916571	0.058266	0.35	0.5	0.37	0.53	0.63	0.72	0.54	0.73	0.29	0.45	0.32	0.47
ENSG00000177076.6	ACER2	1.44169	0.527764	0.0016662	0.005838	2.77827	1.3463	0.429004	0.00445255	0.0157708	2.35139	0.78	1.04	0.98	1.11	1.51	1.27	1.46	1.16	1.25	1.25	1.17	1.01
ENSG00000078124.12	ACER3	-1.16657	-0.222269	0.00104403	0.00397366	-2.98129	-1.04819	-0.0678991	0.131709	0.226654	-0.880384	11.47	11.91	12.28	12.88	11.35	11.82	9.34	9.86	11.88	12.48	10.93	11.05
ENSG00000100813.14	ACIN1	1.02209	0.0315239	0.415316	0.517498	0.381622	1.01812	0.0259021	0.479646	0.594105	0.319079	67.74	68.06	74.96	81.99	78.57	75.04	72.52	73.29	75.97	69.28	68.99	72.39
ENSG00000131473.17	ACLY	-1.30962	-0.389153	3.61e-06	5.52e-05	-5.4421	-1.31794	-0.398282	1.52e-06	4.22e-05	-5.81883	82.09	82.78	84.75	86.35	64.49	63.19	62.48	63.54	61.44	62.54	62.85	61.54
ENSG00000122729.19	ACO1	-1.30133	-0.379982	0.000274442	0.00137145	-3.56155	-1.35635	-0.439733	3.05e-05	0.000353027	-4.5157	13.76	13.09	12.24	11.66	8.66	9.61	9.54	10.42	9.11	8.5	9.22	8.69
ENSG00000100412.16	ACO2	-1.32751	-0.408726	1.73e-06	3.23e-05	-5.76158	-1.56265	-0.64399	2.02e-08	2.36e-06	-7.69497	50.67	49.77	50.8	52.36	38.26	38.85	38.47	39.22	32.14	32.48	31.55	32.5
ENSG00000184227.8	ACOT1	1.47701	0.562683	0.0118342	0.0288272	1.92686	1.35829	0.441795	0.0134835	0.0377055	1.8702	1.51	1.83	1.41	1.51	2.33	1.69	2.71	2.02	1.81	1.74	2	1.94
ENSG00000162390.17	ACOT11	1.67909	0.747683	0.000182364	0.000998193	3.73906	1.13892	0.187662	0.226804	0.342207	0.644349	0.37	0.44	0.45	0.62	0.81	0.68	0.63	0.63	0.53	0.56	0.42	0.47
ENSG00000112304.11	ACOT13	1.3306	0.412072	0.00225037	0.00742676	2.64775	-1.51138	-0.595863	0.000167478	0.00124796	-3.77604	19.08	20.53	18.47	14.91	22.67	24.25	25.81	28.36	10.56	10.5	12.88	11.98
ENSG00000119673.14	ACOT2	1.74623	0.804245	2.6e-06	4.33e-05	5.58585	1.42222	0.508149	0.000134927	0.00106607	3.8699	5.64	5.21	4.96	5.63	8.27	9.05	9.07	8.36	6.13	6.96	7.37	6.34
ENSG00000177465.4	ACOT4	1.40771	0.493354	0.0108224	0.026756	1.96568	-1.03906	-0.055276	0.745201	0.816978	-0.127726	1.06	1.06	0.87	0.86	1.23	1.25	1.38	1.37	0.72	0.75	0.91	0.89
ENSG00000097021.19	ACOT7	-1.25474	-0.327389	0.0034573	0.0104964	-2.46126	-1.08155	-0.113105	0.165903	0.269434	-0.780147	23.07	23.79	25.37	30.11	20.6	20.79	19.9	17.98	21.87	23.1	22.6	22.19
ENSG00000101473.17	ACOT8	-1.29402	-0.371861	0.00100057	0.00383893	-2.99975	-1.08275	-0.114701	0.0908007	0.169265	-1.04191	19.41	17.64	17.31	17.7	11.01	12.75	14.13	14.5	15.97	15.62	17.43	15.1
ENSG00000123130.17	ACOT9	1.04112	0.0581344	0.439259	0.540101	0.357279	1.25845	0.331652	0.000270339	0.00178932	3.56809	54.33	57.51	51.48	50.2	48.25	54.71	57.99	60.71	64.12	62.3	66.81	62.8
ENSG00000161533.12	ACOX1	-1.00185	-0.00266802	0.956099	0.969816	-0.0194971	-1.09321	-0.128566	0.01796	0.0471464	-1.74569	12.63	11.62	13.06	12.87	11.71	12.94	10.62	11.62	10.8	11.3	12.22	11.21
ENSG00000087008.16	ACOX3	1.01573	0.0225197	0.761816	0.823402	0.11815	-1.05054	-0.0711319	0.333472	0.455842	-0.47694	3.12	2.98	4.78	5.17	3.55	3.49	4.09	3.32	3.09	3.7	2.67	2.77
ENSG00000143727.16	ACP1	-1.28186	-0.358237	0.00508854	0.0143334	-2.29341	-1.08893	-0.122913	0.216439	0.329804	-0.664664	69.6	73.03	61.01	53.92	47.39	49.7	50.04	53.13	58.52	55.24	58.48	57.12
ENSG00000134575.10	ACP2	1.15025	0.201943	0.0446321	0.0854183	1.35035	-1.08457	-0.11712	0.129495	0.223661	-0.887749	16.43	15.66	14.86	16.78	16.09	16.62	18.11	18.03	13.53	14.86	13.68	12.47
ENSG00000162836.12	ACP6	1.10268	0.141015	0.2425	0.336878	0.615289	-1.32874	-0.410062	0.00387004	0.0141204	-2.41228	8.34	7.66	6.39	7.45	9.11	8.58	9.32	9.04	5.38	6.07	5.53	5.12
ENSG00000183760.10	ACP7	-1.49523	-0.58037	0.00248188	0.00804066	-2.60522	1.12829	0.174133	0.142182	0.240203	0.847154	1.18	1.21	1.46	1.09	0.87	0.77	0.97	0.7	1.52	1.22	1.33	1.18
ENSG00000014257.16	ACPP	1.03861	0.0546548	0.709798	0.782155	0.148865	-1.54844	-0.630811	0.00130022	0.00597399	-2.88598	1.86	1.94	2.39	1.59	1.87	1.57	2.2	2.08	1.37	0.77	1.14	1.22
ENSG00000167107.12	ACSF2	-1.30348	-0.382371	0.00179632	0.0062075	-2.74562	-1.27631	-0.351976	0.000514718	0.00290759	-3.28843	19.44	17.71	18.47	21.07	13.87	13.28	15.81	14.87	14.97	14.28	16.09	14.09
ENSG00000176715.16	ACSF3	-1.20845	-0.273156	0.0046548	0.0132993	-2.3321	1.10014	0.13769	0.0814155	0.155129	1.08929	9.45	8.67	9.49	12.7	8.18	6.67	6.44	7.33	10.55	9.05	8.26	9.41
ENSG00000151726.14	ACSL1	1.34706	0.429815	0.0002851	0.0014164	3.545	-1.30037	-0.378926	0.000548394	0.00305465	-3.26091	3.31	3.65	3.64	3.07	4.8	4.37	3.89	4.55	2.65	2.62	2.6	2.34
ENSG00000123983.14	ACSL3	-1.19542	-0.257522	0.000564849	0.00243036	-3.24807	1.26802	0.342575	2.64e-05	0.000316026	4.57771	68.23	70.09	66.64	65.1	55.77	57.48	58.13	60.44	82.05	82.98	83.87	86.29
ENSG00000068366.19	ACSL4	1.36775	0.451804	8.34e-06	9.9e-05	5.07864	1.27991	0.356038	2.23e-05	0.000281003	4.65139	40.06	37.27	39.14	37.6	50.67	53.98	51.29	53.38	46.46	45.36	47.13	48.49
ENSG00000197142.10	ACSL5	1.87738	0.908723	0.00355963	0.0107326	2.44859	-1.19276	-0.254306	0.138771	0.235612	-0.857701	0.22	0.22	0.25	0.34	0.49	0.26	0.46	0.45	0.19	0.15	0.14	0.16
ENSG00000154930.15	ACSS1	1.05121	0.0720523	0.311679	0.41257	0.506292	-1.16474	-0.220011	0.0217282	0.0547036	-1.66298	3.46	3.33	4.06	4.49	3.96	3.91	3.55	3.65	2.84	2.94	3.39	2.91
ENSG00000131069.20	ACSS2	-1.6701	-0.739932	4.46e-07	1.35e-05	-6.35098	-1.11873	-0.161862	0.033268	0.0766933	-1.47797	12.61	13.74	13.49	12.86	8.02	7.61	7.48	7.81	10.08	10.33	11.26	10.97
ENSG00000107796.13	ACTA2	-1.40528	-0.490861	0.0144758	0.0339625	-1.83936	-1.29969	-0.378167	0.00481142	0.0167708	-2.31773	3.06	3.41	3.99	3.77	2.37	1.83	2.85	2.33	2.07	2.38	2.55	2.41
ENSG00000180139.11	ACTA2-AS1	-1.64692	-0.719767	0.00730119	0.0193793	-2.13661	-1.2494	-0.32124	0.0919297	0.170781	-1.03654	0.61	0.89	1.1	1.47	0.56	0.8	0.39	0.49	0.7	0.61	0.66	0.61
ENSG00000075624.15	ACTB	-1.16985	-0.226324	0.000456821	0.00205569	-3.34025	-1.0634	-0.0886778	0.103617	0.187272	-0.984568	2117.73	2140.09	2168.36	2415.42	2125.45	2113.3	2027.32	2041.98	1927.17	2162.58	1946.98	1968.4
ENSG00000169067.4	ACTBL2	2.40784	1.26774	2.79e-05	0.000238345	4.55498	1.52938	0.612944	0.00459445	0.0161445	2.33777	0.85	0.72	0.75	0.58	1.52	1.66	1.67	1.86	1.04	0.89	1.09	0.92
ENSG00000188460.4	ACTBP11	-1.03818	-0.0540622	0.735322	0.801724	-0.133522	-1.08538	-0.118197	0.497661	0.61079	-0.303067	1.39	2.03	1.94	1.91	2.17	1.66	1.68	1.32	1.29	1.97	1.32	1.37
ENSG00000213763.4	ACTBP2	-1.02312	-0.0329729	0.790417	0.845399	-0.102144	1.06648	0.0928533	0.561477	0.667644	0.250668	3.61	4.68	4.05	4.63	4.65	3.41	4.14	3.66	3.24	5.5	3.91	3.9
ENSG00000185607.5	ACTBP7	-1.01668	-0.0238706	0.899306	0.927155	-0.0460926	1.37795	0.462519	0.0180065	0.0472375	1.74457	0.77	0.88	0.94	1.09	1.25	0.84	0.85	0.64	0.91	0.99	1.16	1.34
ENSG00000184009.11	ACTG1	1.01639	0.0234494	0.614543	0.704073	0.211448	1.04937	0.0695192	0.136865	0.233267	0.863708	1059.86	1117.86	1019.19	1111.19	1100.21	1099.62	1212.24	1110.82	1068.71	1133.33	1051.33	1065.78
ENSG00000229465.1	ACTG1P11	1.04884	0.0688008	0.709838	0.782155	0.148841	1.17133	0.228142	0.191651	0.300209	0.717488	1.64	2.39	1.59	1.93	1.95	2.28	1.97	1.51	2.06	2.05	1.66	2.01
ENSG00000230581.2	ACTG1P14	1.04994	0.0703095	0.789732	0.844834	0.10252	1.41214	0.497888	0.0534736	0.111541	1.27186	0.51	0.44	0.88	0.66	0.64	0.87	0.65	0.35	0.94	0.58	0.79	0.7
ENSG00000241547.1	ACTG1P20	1.17413	0.231595	0.286669	0.385215	0.54262	-1.06331	-0.0885635	0.779193	0.844689	-0.108355	1.35	2.25	2.04	2.53	2.82	2.45	2.16	1.75	2.25	2.02	1.63	0.84
ENSG00000215388.3	ACTG1P3	-1.45269	-0.538724	0.0852294	0.144816	-1.06941	1.24904	0.320814	0.143577	0.241922	0.842916	1.27	1.37	2.25	2.7	2.03	1.33	0.79	0.97	2.23	2.26	1.62	1.9
ENSG00000163017.13	ACTG2	-3.97486	-1.9909	0.000318748	0.00154655	-3.49655	-2.159	-1.11036	0.00112769	0.00533553	-2.94781	1.37	1.01	0.88	0.97	0.27	0.47	0.11	0.28	0.41	0.3	0.51	0.47
ENSG00000182584.5	ACTL10	-1.46776	-0.553612	0.0511032	0.095456	-1.29155	-1.46977	-0.555588	0.0709067	0.139048	-1.14931	0.53	0.51	0.42	0.56	0.47	0.22	0.35	0.31	0.16	0.37	0.4	0.26
ENSG00000136518.17	ACTL6A	1.12021	0.163769	0.194002	0.281459	0.712195	1.03129	0.0444496	0.686663	0.770551	0.163256	86.37	85.18	69.85	54.56	74.03	80.65	83.8	83.14	74.6	77.79	77.67	76.27
ENSG00000072110.13	ACTN1	1.30328	0.38215	0.00687203	0.0184427	2.16292	1.16972	0.226166	0.037268	0.0839423	1.42866	270.62	284.37	329.61	375.47	500.84	466.91	412.78	383.47	370.99	381.77	359.04	369.22
ENSG00000130402.12	ACTN4	-1.12753	-0.173164	0.0268514	0.056293	-1.57103	1.15675	0.210075	0.00364508	0.0134811	2.43829	208.7	219.6	216.7	241.88	214.37	206.92	209.18	190.23	243.48	273.15	258.49	249.64
ENSG00000213493.3	ACTN4P1	1.15672	0.210043	0.258881	0.354795	0.5869	1.75571	0.812052	0.000190588	0.00137789	3.7199	0.82	1.26	1.44	1.4	1.14	1.57	1.4	1.27	1.9	1.85	1.83	1.91
ENSG00000131966.14	ACTR10	1.27424	0.349641	0.00207727	0.00697781	2.68251	1.3299	0.411321	0.000130548	0.00104074	3.88423	39.37	43.24	39.64	38.17	51.05	49.31	50.71	55.83	53.59	51.24	55.98	52.89
ENSG00000138107.13	ACTR1A	-1.29328	-0.371038	0.000435012	0.00198229	-3.3615	1.00939	0.01348	0.832063	0.885673	0.0798436	50.66	51.69	44.79	45.51	37.18	35.13	38.87	36.18	46.26	47.93	48.12	46.91
ENSG00000115073.7	ACTR1B	-1.18122	-0.240284	0.00568252	0.0157355	-2.24546	1.04435	0.0626014	0.316119	0.438758	0.50015	15.74	15.47	15.02	16.19	13.09	11.24	14.01	12.16	15.02	15.92	16.25	14.57
ENSG00000138071.13	ACTR2	-1.2169	-0.283209	0.00720404	0.0191749	-2.14242	-1.03907	-0.0552988	0.51421	0.626199	-0.28886	65.1	66.92	76.59	84.69	61.69	58.65	57.61	59.67	72.31	65.7	67.37	67.84
ENSG00000115091.11	ACTR3	-1.08911	-0.123145	0.246711	0.34141	-0.607811	1.25293	0.325312	0.00440721	0.0156657	2.35584	123.48	126.51	115.84	106.02	96.76	100.54	103.86	110.83	132.76	128.51	130.25	132.29
ENSG00000133627.18	ACTR3B	-1.07385	-0.102795	0.258994	0.354919	-0.586711	1.00023	0.000325341	0.997169	0.998168	0.00123121	6.58	5.92	7.45	7.1	4.59	6.05	4.91	5.71	6.1	4.18	5.7	5.07
ENSG00000106526.10	ACTR3C	-1.5571	-0.638861	0.000532258	0.00232285	-3.27388	-1.10737	-0.147137	0.162539	0.265211	-0.789041	7.35	7.36	7.95	9.93	5.39	4.44	5.44	4.58	7.37	6.29	5.49	6.62
ENSG00000101442.10	ACTR5	-1.08044	-0.111618	0.108578	0.176186	-0.964259	-1.08163	-0.113205	0.099441	0.18133	-1.00243	8.02	7.22	7.12	7.77	6.39	6.82	6.44	6.72	6.61	6.46	6.16	6.81
ENSG00000075089.9	ACTR6	1.14859	0.19986	0.153406	0.232435	0.814158	1.19317	0.254801	0.0582994	0.119132	1.23434	13.51	12.99	11.22	9.33	12.35	12.41	12.96	14.24	12.53	12.92	14.1	13.09
ENSG00000113812.14	ACTR8	1.10747	0.147265	0.03514	0.0702055	1.4542	1.03486	0.0494416	0.444095	0.561154	0.352524	12.55	10.47	12.61	11.47	14.07	11.52	13.76	12.93	12.91	11.02	11.87	12.39
ENSG00000184378.3	ACTRT3	1.34535	0.427976	0.00717307	0.0190987	2.14429	1.32093	0.401559	0.0125949	0.0357251	1.8998	5.78	5.4	4.25	4.66	5.83	6.73	6	6.79	5.85	5.32	6.41	6.66
ENSG00000115170.13	ACVR1	-1.37536	-0.459811	0.0884523	0.149072	-1.05329	1.10108	0.138923	0.498685	0.611859	0.302174	3.15	3.07	5.33	6.37	3.75	3.66	2.4	2.4	4.78	4.41	4.03	4.42
ENSG00000135503.13	ACVR1B	1.1215	0.165429	0.0144983	0.034001	1.83868	1.12013	0.163663	0.0118156	0.0340215	1.92754	5.67	5.53	6.08	6.13	6.93	6.72	6.88	6.34	6.47	5.72	6.88	6.35
ENSG00000123612.16	ACVR1C	1.26785	0.34239	0.102146	0.167801	0.990779	-1.1654	-0.220829	0.361158	0.483123	-0.442303	0.14	0.17	0.14	0.15	0.22	0.25	0.15	0.13	0.09	0.09	0.21	0.14
ENSG00000121989.15	ACVR2A	-1.01581	-0.0226277	0.811545	0.860775	-0.0906873	1.15922	0.213156	0.032032	0.074434	1.49442	3.11	4.06	4.28	3.83	3.53	3.23	3.88	4.71	4.63	4.12	4.24	4.96
ENSG00000114739.14	ACVR2B	-1.1618	-0.216366	0.00558164	0.0154959	-2.25324	-1.32324	-0.404071	4.42e-05	0.000466189	-4.35436	1.78	1.84	2.15	2.09	1.72	1.67	1.49	1.59	1.36	1.43	1.33	1.4
ENSG00000243989.9	ACY1	-1.33173	-0.4133	0.0114146	0.0279767	-1.94254	-1.08495	-0.117624	0.319033	0.441615	-0.496164	11.55	12.25	9.35	9.16	6.66	5.76	7.85	7.79	9.83	9.29	10.71	10.62
ENSG00000119640.9	ACYP1	1.06711	0.0937141	0.3511	0.453576	0.454569	-1.05206	-0.0732188	0.485964	0.599953	-0.313396	22.61	24.73	20.95	19.47	22.16	20.52	23.66	22.31	17.06	18.85	21	20.43
ENSG00000170634.13	ACYP2	1.16838	0.224508	0.200899	0.289624	0.697021	1.05183	0.0728978	0.5745	0.678813	0.24071	3	3.2	2.53	2.96	2.71	2.94	3.93	3.85	2.89	2.39	2.44	2.83
ENSG00000167604.14	AD000864.1	1.17489	0.232528	0.0851562	0.144722	1.06978	1.18566	0.24569	0.0732346	0.14286	1.13528	2.12	2.26	2.14	2.49	2.76	2.53	2.89	2.11	2.31	2.71	2.1	2.31
ENSG00000196839.13	ADA	-1.51276	-0.597182	2.89e-05	0.000244731	-4.53842	-1.32336	-0.404207	0.000179816	0.00131607	-3.74517	11.06	10.15	9.91	10.41	5.98	6.51	6.53	6.8	7.41	7.51	7.35	7.12
ENSG00000168803.15	ADAL	-1.33914	-0.421303	5.43e-05	0.00039502	-4.26532	1.14342	0.193359	0.00262334	0.01041	2.58115	8	9.27	10.11	10.42	6.71	8.66	5.73	7.47	11.09	9.67	10.23	11.15
ENSG00000137845.15	ADAM10	-1.04252	-0.060069	0.213675	0.304704	-0.670247	1.00368	0.00529712	0.910363	0.941967	0.0407852	67.48	69.27	90.13	85.29	78.83	75.24	71.09	74.9	84.09	71.81	71.22	79.63
ENSG00000073670.14	ADAM11	-1.5504	-0.63264	0.0326344	0.0660852	-1.48632	-1.09645	-0.132837	0.559912	0.666278	-0.25188	0.34	0.47	0.38	0.45	0.49	0.14	0.25	0.44	0.43	0.54	0.32	0.19
ENSG00000148848.14	ADAM12	1.07963	0.110543	0.238813	0.332562	0.621941	-1.02648	-0.0377023	0.727103	0.802694	-0.138404	1.37	1.02	1.14	1.15	1.27	0.9	1.07	0.95	1.2	0.87	1.07	0.79
ENSG00000143537.13	ADAM15	-1.1592	-0.213135	0.00431789	0.0125064	-2.36473	-1.14558	-0.196079	0.00926973	0.0280018	-2.03293	71.07	67.32	63.55	71.95	62.62	57.99	62.98	57.03	56.08	57.86	63.26	58.45
ENSG00000151694.13	ADAM17	-1.42841	-0.51441	3.95e-06	5.88e-05	-5.40382	-1.27677	-0.352493	4.3e-05	0.000457574	-4.36619	16.06	15.6	17.35	15.56	11.19	10.73	10.81	11.16	12.46	11.02	12.22	11.27
ENSG00000135074.15	ADAM19	-1.18717	-0.247532	0.00546508	0.0152245	-2.2624	-1.70725	-0.771678	1.1e-07	7.51e-06	-6.95842	6.67	7.24	7.36	7.71	6.8	5.89	5.58	5.72	4.22	3.92	3.81	4.11
ENSG00000229186.4	ADAM1A	1.60181	0.679704	0.253292	0.348818	0.596378	2.07296	1.05169	0.0625501	0.125983	1.20377	0.29	0.08	0.31	0.17	0.54	0.11	0.33	0.33	0.38	0.16	0.38	0.36
ENSG00000134007.4	ADAM20	1.64513	0.718205	0.0106405	0.0263909	1.97304	1.184	0.243668	0.289265	0.410282	0.538704	0.27	0.42	0.49	0.67	0.87	0.86	0.54	0.58	0.4	0.41	0.44	0.56
ENSG00000259158.4	ADAM20P1	1.81641	0.86109	0.00249855	0.00808273	2.60231	1.23581	0.305452	0.205864	0.317134	0.68642	0.33	0.32	0.46	0.79	0.99	0.84	0.66	0.72	0.49	0.5	0.37	0.5
ENSG00000114948.13	ADAM23	-1.07591	-0.105563	0.276287	0.374153	-0.558639	1.1833	0.242818	0.0343986	0.0786535	1.46346	2.58	2.36	3.51	2.5	4.81	3.1	1.58	2.71	3.65	3.63	3.92	3.59
ENSG00000197140.15	ADAM32	2.50162	1.32287	6.87e-06	8.64e-05	5.16334	1.67345	0.742828	0.000591311	0.00325292	3.22818	0.8	0.97	1.24	0.96	3.19	2.63	1.92	1.84	1.57	1.37	1.07	1.5
ENSG00000151651.16	ADAM8	-1.27872	-0.354703	0.00405547	0.0119039	-2.39196	-1.45683	-0.542832	4.55e-05	0.000475763	-4.3421	11.87	12.47	11.09	12.51	9.2	8.16	10.03	10.12	7.8	9.45	8.04	8.03
ENSG00000168615.12	ADAM9	1.49477	0.579919	3.49e-05	0.000281188	4.45773	1.35737	0.440812	0.0001009	0.000853304	3.99611	114.69	116.1	105.7	94.85	155.1	164.64	168.8	178.31	147.49	141.35	142.39	143.76
ENSG00000154734.15	ADAMTS1	1.83855	0.87857	2.99e-07	1.07e-05	6.52386	3.75484	1.90875	1.26e-10	8.75e-08	9.90013	50.66	52.52	41.8	48.41	85.26	78.61	76.57	86.44	157.73	168.3	159.93	165.87
ENSG00000151388.11	ADAMTS12	-1.10158	-0.13958	0.354297	0.456903	-0.450633	-2.39337	-1.25904	5.51e-05	0.000549775	-4.25872	0.49	0.22	0.51	0.34	0.31	0.44	0.31	0.37	0.06	0.33	0.16	0.33
ENSG00000166106.3	ADAMTS15	2.76391	1.46671	1.38e-07	6.41e-06	6.85961	-1.87161	-0.904283	3.96e-05	0.000431404	-4.402	0.32	0.42	0.47	0.45	1.09	1.12	1.14	0.99	0.18	0.18	0.2	0.2
ENSG00000145536.15	ADAMTS16	1.18486	0.244714	0.0913349	0.153006	1.03936	1.09717	0.133785	0.196599	0.305868	0.706418	6.37	6.46	8.16	12.63	9.47	10.68	9.08	8.91	8.06	8.57	7.33	9.08
ENSG00000140470.14	ADAMTS17	-1.30646	-0.385663	0.0849505	0.144478	-1.07083	1.24634	0.317696	0.139762	0.236942	0.854611	0.3	0.25	0.61	0.4	0.32	0.19	0.29	0.25	0.52	0.65	0.3	0.42
ENSG00000049192.15	ADAMTS6	1.34245	0.424866	0.000269565	0.00135376	3.56934	2.14947	1.10398	6.35e-08	5.03e-06	7.19693	3.62	3.84	2.67	2.93	3.81	4.3	3.42	4.25	6.6	5.9	5.6	6.98
ENSG00000143382.14	ADAMTSL4	-26.2849	-4.71616	3.53e-08	2.79e-06	-7.45175	-19.682	-4.2988	3.2e-08	3.16e-06	-7.49535	3.56	3.67	4.82	5.82	0.19	0.13	0.14	0.14	0.24	0.15	0.25	0.17
ENSG00000203804.4	ADAMTSL4-AS1	1.87762	0.908905	4.32e-05	0.00033102	4.36452	1.21711	0.283462	0.033361	0.0768585	1.47676	1.67	1.39	1.74	1.99	3.09	2.92	2.14	2.17	1.22	1.79	1.76	1.74
ENSG00000185761.11	ADAMTSL5	1.35122	0.434265	0.00659399	0.0178087	2.18085	1.59884	0.677025	0.000102992	0.000867785	3.98719	2.29	4.49	4.8	4.66	6.31	4.67	4.75	4.63	5.12	5.12	5.25	5
ENSG00000105963.15	ADAP1	-2.16556	-1.11474	3.87e-05	0.000304083	-4.41284	-1.90241	-0.927826	9.76e-05	0.000833045	-4.01046	6.62	6.44	5.33	7.88	3.18	3.18	2.85	2.71	2.81	3.28	3.97	2.47
ENSG00000160710.16	ADAR	1.1028	0.14117	0.0131916	0.0314802	1.8797	-1.41712	-0.502963	6.19e-07	2.43e-05	-6.20806	48.26	48.6	51.94	52.53	55.93	56.27	52.28	54.25	35.03	33.57	34.85	34.46
ENSG00000197381.16	ADARB1	1.27804	0.353935	0.0985777	0.163114	1.00622	1.66106	0.7321	0.00161319	0.00710308	2.79232	2.3	2.14	2.22	3.46	4.2	3.46	3.85	6.5	3.44	4.19	4.17	6.89
ENSG00000065457.10	ADAT1	-1.46811	-0.553963	0.000261784	0.00132221	-3.58206	1.01432	0.0205173	0.817323	0.874407	0.087606	32.84	32.84	34.04	42.1	22.43	23.57	20.76	21.4	31.77	31.32	32.36	32.66
ENSG00000189007.16	ADAT2	1.15673	0.210057	0.00378101	0.0112689	2.42239	1.26072	0.334245	0.000828627	0.00421562	3.08164	4.72	3.69	5.59	4.27	5.32	4.38	6.24	4.98	5.96	5.84	4.79	6.29
ENSG00000063761.16	ADCK1	1.78158	0.833154	1.45e-05	0.000148403	4.83808	1.17176	0.228682	0.0493589	0.104511	1.30663	2.21	1.7	2.25	2.63	4.09	3.11	3.36	3.58	1.8	1.84	2.34	2.27
ENSG00000133597.11	ADCK2	-2.56804	-1.36067	1.65e-09	4.69e-07	-8.78187	1.16548	0.220921	0.0015326	0.00680816	2.81457	26.01	24.11	23.36	26.43	10.04	9.98	9.62	9.18	27.65	28.38	28.24	27.64
ENSG00000173137.12	ADCK5	1.06979	0.0973335	0.301249	0.401178	0.521074	1.37218	0.456472	7.15e-05	0.000659817	4.14557	5.45	5.57	5.53	6.48	5.23	5.7	5.91	5.2	6.43	6.19	7.04	7.7
ENSG00000164742.16	ADCY1	1.62271	0.698403	0.000426302	0.00195217	3.37028	-1.00499	-0.00717507	0.952122	0.969875	-0.0213074	1.45	1.48	1.78	2.42	2.35	2.84	2.33	2.1	2.05	1.53	1.95	2.12
ENSG00000161912.18	ADCY10P1	-1.37775	-0.462314	0.0982087	0.16257	-1.00785	-1.79003	-0.839988	0.00311365	0.0118782	-2.50673	0.26	0.51	0.3	0.35	0.26	0.43	0.07	0.27	0.06	0.16	0.18	0.09
ENSG00000138031.14	ADCY3	-1.78017	-0.832014	8.87e-08	4.92e-06	-7.05227	-1.02226	-0.0317618	0.552392	0.659637	-0.257752	18.85	18.09	21.99	22.57	12.82	11.64	11.23	10.47	21.99	20.62	21.45	19.06
ENSG00000174233.11	ADCY6	-1.55365	-0.635662	4.54e-05	0.000344615	-4.34252	-1.34618	-0.428867	0.000247	0.00166738	-3.6073	2.87	3.54	3.69	3.43	2.48	2.06	1.82	1.64	2.14	2.59	2.43	2.61
ENSG00000121281.12	ADCY7	-1.41385	-0.499628	0.000163023	0.000914905	-3.78775	-1.2726	-0.347777	0.00173913	0.00752698	-2.75967	8.62	8.77	8.97	11.35	6.82	4.8	7.35	5.71	5.92	6.52	6.87	7.64
ENSG00000162104.10	ADCY9	1.03611	0.0511795	0.68977	0.765986	0.161295	-1.10381	-0.142486	0.237186	0.353997	-0.624911	3.99	3.5	4.74	5.16	4.66	4.47	3.34	3.59	3.03	3.65	2.66	3.74
ENSG00000087274.17	ADD1	-1.26131	-0.334928	2.58e-05	0.00022618	-4.58805	-1.29941	-0.377859	5.82e-06	0.000109081	-5.23506	43.04	41.51	40.3	49.57	35.79	32.42	33.05	33.37	32.54	32.08	31.29	30.93
ENSG00000148700.14	ADD3	-1.59456	-0.673156	9.49e-06	0.000109283	-5.02274	-1.22443	-0.292113	0.000854941	0.00432939	-3.06806	27.74	23.7	23.43	22.19	12.75	13.88	15.62	16.17	17.52	17.2	18.15	18
ENSG00000020181.17	ADGRA2	2.39841	1.26208	9.9e-06	0.000112507	5.00428	1.08775	0.121347	0.531831	0.641358	0.274226	0.32	0.36	0.24	0.35	0.77	0.74	0.78	0.7	0.23	0.28	0.31	0.37
ENSG00000152990.14	ADGRA3	-1.2392	-0.309409	0.0242881	0.051791	-1.61461	-1.30607	-0.385235	0.00688379	0.0221889	-2.16217	6.3	5.47	8.65	8.29	6.37	6.66	5.06	5.14	6.15	4.13	4.8	5.44
ENSG00000121753.12	ADGRB2	-1.17868	-0.237173	0.0619295	0.11156	-1.2081	-1.006	-0.0086241	0.939265	0.961636	-0.027212	2.7	2.97	3.76	4.24	3.01	2.69	2.62	2.54	2.74	3.04	2.98	3.08
ENSG00000180264.11	ADGRD2	-1.30696	-0.386215	0.169164	0.251763	-0.771691	1.51099	0.595498	0.0213102	0.0538889	1.67141	0.96	0.93	1.06	1.54	1.04	0.83	0.65	0.66	1.46	1.45	1.16	1.17
ENSG00000127507.18	ADGRE2	1.07752	0.107719	0.525976	0.622066	0.279034	-1.07449	-0.103651	0.568724	0.673649	-0.245099	0.41	0.38	0.69	0.54	0.67	0.69	0.31	0.45	0.33	0.49	0.35	0.7
ENSG00000123146.20	ADGRE5	1.30888	0.388329	0.00925923	0.0235421	2.03343	1.51301	0.59742	0.000403033	0.00241951	3.39466	8.36	8.38	10.15	10.88	12.5	11.07	11.78	10.83	12.95	13.69	13.34	11.85
ENSG00000153292.16	ADGRF1	1.64212	0.71556	2.56e-07	9.65e-06	6.59148	-1.44166	-0.527734	2.75e-06	6.37e-05	-5.56007	15.29	14.65	16.89	14.64	24.08	25.96	23.42	24.25	9.33	9.47	9.07	9.05
ENSG00000153294.11	ADGRF4	1.73133	0.79188	7.55e-07	1.85e-05	6.12225	1.25584	0.328649	0.000766363	0.00396881	3.11557	6	5.59	5.55	5.39	8.78	9.82	9.5	9.25	7.06	6.71	6.69	6.17
ENSG00000205336.11	ADGRG1	-2.54737	-1.34901	1.6e-08	1.77e-06	-7.79594	-1.12225	-0.166393	0.0486788	0.103387	-1.31266	36.44	36.88	35.3	39.46	15.05	13.74	15.64	15.85	32.64	32.69	34.65	32.82
ENSG00000112414.14	ADGRG6	1.21361	0.279304	6.95e-05	0.000472246	4.15816	-1.10206	-0.140207	0.00440118	0.0156547	-2.35643	22.5	20.82	22.71	24.42	32.47	30.4	25.7	29.32	20.8	23.7	21.93	25.21
ENSG00000072071.16	ADGRL1	1.56814	0.649054	0.00144297	0.00519294	2.84074	1.0025	0.00360648	0.97898	0.986879	0.00922619	2.05	2.6	3.17	2.95	3.81	4.23	3.48	3.47	2.61	2.21	2.94	2.36
ENSG00000117114.19	ADGRL2	-1.21014	-0.275177	0.0402105	0.078449	-1.39566	-2.44212	-1.28814	2.55e-06	6.04e-05	-5.59332	1.42	1.6	1.01	1.38	0.97	0.82	0.98	1.27	0.63	0.64	0.56	0.45
ENSG00000197894.11	ADH5	1.19192	0.253292	0.035087	0.0701476	1.45485	1.12981	0.176078	0.0756058	0.14629	1.12145	31.47	34.26	29.6	26.69	32.49	35.28	37.85	38.43	33.65	32.4	33.99	31.92
ENSG00000182551.14	ADI1	1.00958	0.0137571	0.861663	0.898454	0.0646623	-1.50258	-0.587442	1.68e-05	0.000226153	-4.77432	23.12	24.65	22.07	20.67	20.76	21.54	24.04	24.3	13.79	13.86	16	14.49
ENSG00000159346.13	ADIPOR1	1.20546	0.269583	0.00255514	0.00822471	2.59259	-1.2225	-0.289833	0.000749288	0.00390186	-3.12535	77.6	74.71	67.39	68.36	81.88	83.89	87.22	91.68	56.76	58.15	57.09	57.87
ENSG00000006831.10	ADIPOR2	1.10969	0.150163	0.0205362	0.0452198	1.68748	-1.52494	-0.608753	6.69e-07	2.58e-05	-6.1744	22.48	23.34	25.23	26.35	27.75	27.71	24.72	25.79	15.79	14.51	15.28	16.23
ENSG00000148671.13	ADIRF	-1.48611	-0.571544	0.000232488	0.00120725	-3.6336	-2.24324	-1.16559	2.65e-07	1.39e-05	-6.57672	168.16	166.26	139.7	132.05	85.12	78.14	106.23	100.7	62.14	64.01	76.09	76.11
ENSG00000272734.1	ADIRF-AS1	-1.10364	-0.142269	0.0727156	0.127087	-1.13837	-1.23887	-0.309022	0.000371407	0.00227481	-3.43015	8.88	8.58	5.59	6.34	6.71	5.29	6.31	6.6	5.91	7.16	6.32	4.82
ENSG00000156110.13	ADK	-1.23049	-0.299238	9.14e-05	0.000586224	-4.03884	1.14164	0.191106	0.000955921	0.00470083	3.01958	53.78	54.1	54.78	58.03	44.56	44.88	44.26	44.83	62.57	58.39	59.3	61.7
ENSG00000148926.10	ADM	1.50733	0.591996	6.57e-05	0.000451933	4.18258	1.45411	0.540133	8.38e-05	0.000741258	4.07673	26.62	29.02	24.11	22.53	36.89	36.56	40.59	37.63	36.04	36.33	35.84	34.49
ENSG00000101126.17	ADNP	-1.37344	-0.457793	0.20607	0.296154	-0.685986	-1.35234	-0.435463	0.155064	0.255912	-0.809489	31.06	31.58	68.13	73.03	46.12	46.69	24.34	25.29	38.65	29.22	27.96	36.23
ENSG00000101544.9	ADNP2	1.28446	0.361158	0.000456073	0.00205404	3.34097	1.11377	0.155454	0.0181506	0.0475608	1.74111	8.97	9.01	10.19	10.26	13.02	12.63	11.35	11.25	10.48	10.01	10.01	10.53
ENSG00000259456.3	ADNP-AS1	-1.55996	-0.641505	0.023423	0.0503374	-1.63036	1.16631	0.221946	0.20928	0.320974	0.679273	1.56	1.37	2.32	1.51	1.42	0.53	0.65	0.95	1.68	2.04	1.72	1.03
ENSG00000181915.4	ADO	1.2683	0.3429	0.000645899	0.00270786	3.18984	1.38671	0.471668	5.53e-05	0.000550539	4.25764	7.28	7.41	6.8	6.42	8.64	8.67	8.43	8.48	8.88	9.48	9.23	9.4
ENSG00000163485.17	ADORA1	1.98494	0.989096	0.000151627	0.00086261	3.81922	1.05292	0.0743913	0.578269	0.682435	0.23787	2.15	1.63	1.29	1.98	2.93	3.02	3.61	3.61	1.68	1.93	1.54	1.8
ENSG00000128271.22	ADORA2A	1.46627	0.55215	0.0806421	0.138372	1.09344	1.22859	0.297009	0.385918	0.507826	0.413505	0.34	0.77	0.99	1.07	0.52	1.13	0.54	1.13	0.47	0.49	0.97	0.45
ENSG00000178803.11	ADORA2A-AS1	-1.78667	-0.837271	0.00233032	0.00764002	-2.63258	-1.02811	-0.0399877	0.843171	0.893572	-0.0740842	0.53	0.4	0.47	0.51	0.2	0.28	0.27	0.18	0.37	0.34	0.65	0.42
ENSG00000170425.3	ADORA2B	1.18605	0.246165	0.00107763	0.0040747	2.96753	1.26891	0.34359	8.68e-05	0.000760868	4.06133	11.58	11.66	10.9	11.49	13.13	12.84	12.45	13.35	13.1	13.87	14.12	13.77
ENSG00000159322.17	ADPGK	1.41029	0.495994	1.85e-06	3.39e-05	5.7317	1.06725	0.0939026	0.0698472	0.137392	1.15585	23.91	23.35	23.03	25.82	33.46	32.42	31.25	33.05	24.53	26.05	24.82	24.63
ENSG00000153531.13	ADPRHL1	-1.16299	-0.217841	0.333602	0.436015	-0.476771	1.4636	0.549517	0.0243186	0.0599973	1.61406	0.41	0.55	0.65	0.3	0.44	0.33	0.39	0.48	0.49	0.39	0.53	0.56
ENSG00000116863.11	ADPRHL2	-1.00114	-0.00163956	0.988781	0.99209	-0.00489974	1.26329	0.337181	0.0123397	0.0351571	1.9087	15.83	15.32	13.46	11.5	12.94	13.04	14.15	13.25	15.71	17.49	17.36	16.55
ENSG00000170222.11	ADPRM	1.30797	0.387334	0.005969	0.0163748	2.2241	1.26392	0.337907	0.0187116	0.0487037	1.72789	3.14	3.62	3.53	3.05	4.12	3.81	4.45	4.05	4.4	3.39	3.62	3.72
ENSG00000184160.7	ADRA2C	1.2829	0.359413	0.0237004	0.0508056	1.62524	-1.71358	-0.777015	0.000374195	0.00228751	-3.4269	1.07	1.1	0.97	1.13	1.63	1.21	1.2	1.34	0.57	0.52	0.64	0.45
ENSG00000043591.5	ADRB1	1.25385	0.326365	0.10548	0.17216	0.97683	1.40653	0.492135	0.0248174	0.0609788	1.60524	0.35	0.38	0.29	0.46	0.4	0.49	0.4	0.49	0.54	0.38	0.48	0.42
ENSG00000169252.5	ADRB2	1.11299	0.154446	0.0558293	0.102359	1.25314	1.20443	0.26835	0.00383079	0.0140092	2.41671	16.38	16	13.9	14.18	16.13	16.39	16.84	16.58	18.05	17.75	17.69	16.78
ENSG00000130706.13	ADRM1	-1.37037	-0.454566	1.6e-05	0.000159031	-4.79645	-1.12796	-0.173717	0.0143891	0.0395446	-1.84197	175.79	180.26	162.63	161.28	125.27	119.82	128.56	120	141.46	155.5	151.17	141.1
ENSG00000239900.12	ADSL	1.04715	0.066474	0.423076	0.524992	0.373581	-1.02319	-0.0330764	0.675103	0.761371	-0.17063	43.39	43.44	39.23	42.55	41.15	41.77	41.81	40.74	39.56	37.1	39.3	35.96
ENSG00000035687.10	ADSS	1.33476	0.416578	0.000761954	0.00308883	3.11807	1.15357	0.206103	0.0111976	0.0325191	1.95087	23.8	23.72	23.22	20.7	28.06	28.34	31.36	32.28	27.13	24.78	25.38	24.88
ENSG00000185100.10	ADSSL1	1.60612	0.683583	0.00753728	0.0198883	2.12279	1.35372	0.436927	0.0651781	0.13006	1.1859	1.29	1.42	0.94	1.07	1.76	1.65	1.8	1.77	1.76	1.14	1.07	1.48
ENSG00000111863.12	ADTRP	-1.11685	-0.159429	0.128989	0.203045	-0.889448	1.14182	0.191339	0.108609	0.194864	0.964134	6.57	5.56	5.68	5.32	5.44	4.59	4.59	4.79	7.12	5.73	5.72	6.69
ENSG00000139154.15	AEBP2	1.05746	0.0806033	0.676887	0.75601	0.169484	-1.54525	-0.627841	0.0042299	0.0151737	-2.37367	14.76	15.28	20.09	23.46	19.59	20.24	14.66	16.8	10.63	9.29	11.7	10.88
ENSG00000181026.15	AEN	1.59615	0.6746	1.35e-05	0.000140521	4.86894	1.19277	0.254318	0.0106531	0.0312402	1.97253	15.45	15.03	13.26	12.63	21.42	20.41	22	21.65	16.17	16.8	15.49	15.69
ENSG00000104964.14	AES	-1.3826	-0.467388	0.000715234	0.00293992	-3.14555	-1.03941	-0.0557693	0.53077	0.640449	-0.275094	73.89	73.39	60.71	61.12	46.96	41.89	52.23	55.14	59.53	68.42	62.43	65.59
ENSG00000263335.1	AF001548.2	1.12687	0.172325	0.37556	0.477816	0.425321	-1.40451	-0.490063	0.0520315	0.109212	-1.28373	1.11	0.98	1.53	1.23	1.61	1.62	1.05	1.09	0.93	0.75	0.78	0.49
ENSG00000235888.2	AF064858.1	1.84879	0.886585	0.000148653	0.000849873	3.82783	1.37373	0.458104	0.0307737	0.0721489	1.51182	0.2	0.18	0.27	0.31	0.42	0.54	0.46	0.47	0.33	0.21	0.35	0.34
ENSG00000272163.1	AF106564.1	1.3978	0.483163	0.00467369	0.013346	2.33034	1.46748	0.553345	0.00178117	0.00766331	2.74929	1.05	1.4	1.09	1.42	1.76	1.49	1.82	1.5	1.57	1.83	1.63	1.42
ENSG00000259319.1	AF111167.2	-1.20488	-0.268892	0.248954	0.344014	-0.603881	1.01493	0.0213859	0.89788	0.933244	0.0467819	0.19	0.17	0.25	0.2	0.23	0.12	0.17	0.14	0.28	0.15	0.18	0.17
ENSG00000251136.8	AF117829.1	1.24037	0.310775	0.12339	0.19571	0.90872	1.21901	0.285715	0.0883076	0.165515	1.054	6.27	6.2	9.17	7.52	10.4	10.62	6.67	8.26	9.61	8.63	7.1	9.33
ENSG00000253500.5	AF121898.1	1.78688	0.837444	0.00016155	0.000908529	3.79169	-1.55945	-0.641033	0.00600074	0.0199808	-2.2218	1.65	2.04	1.95	1.78	3.05	3.4	2.97	3.59	0.93	0.82	1.2	1.38
ENSG00000235609.7	AF127577.4	1.53036	0.61387	5.93e-05	0.000420011	4.22694	1.38641	0.471349	0.000428551	0.00253222	3.368	0.97	0.94	1	1.05	1.47	1.27	1.4	1.6	1.37	1.07	1.28	1.3
ENSG00000231125.2	AF129075.1	1.06598	0.0921791	0.616578	0.705713	0.210012	1.11661	0.159127	0.355414	0.477508	0.449266	1.68	2.18	1.73	1.87	1.57	2.03	1.96	2.06	2.09	1.57	1.71	1.99
ENSG00000254556.1	AF131215.2	1.68725	0.754674	0.010224	0.0255339	1.99038	-1.24979	-0.321687	0.184093	0.291034	-0.734963	0.98	1.25	2.17	2.33	3.35	2.91	1.96	2.25	1.07	1.23	1.02	1.14
ENSG00000254936.4	AF131215.4	1.80374	0.850992	0.00102837	0.00392973	2.98785	-1.07687	-0.106839	0.507375	0.619811	-0.294671	2.13	2.51	3.34	3.77	5.86	6.02	3.78	4.41	2.89	2.26	2.06	2.46
ENSG00000255310.2	AF131215.5	1.83043	0.872182	0.000149507	0.000853579	3.82534	1.1607	0.214997	0.12829	0.222156	0.891808	2.01	2.21	2.96	3.19	5.32	4.75	3.56	4.28	2.88	2.61	2.27	2.9
ENSG00000269918.1	AF131215.6	1.56202	0.643416	0.00554346	0.0153952	2.25622	-1.11637	-0.158813	0.287761	0.408874	-0.540968	2.56	2.53	3.92	3.75	6.27	5.01	3.73	3.82	2.94	2.27	2.25	2.63
ENSG00000254332.1	AF201337.1	1.15175	0.203823	0.238378	0.33212	0.622733	1.24775	0.319329	0.100234	0.182588	0.998985	2.98	4.17	3.38	2.81	4.27	3.7	3.2	3.97	3.81	4.18	2.89	4.12
ENSG00000270137.1	AF230666.2	1.16432	0.219492	0.345787	0.448357	0.461191	-1.08025	-0.111369	0.65538	0.745702	-0.183506	1	0.98	1.9	2.04	1.99	1.45	1.49	1.37	1.38	1.01	0.9	1.17
ENSG00000196526.10	AFAP1	-1.96267	-0.972816	8.05e-07	1.93e-05	-6.09424	-1.68033	-0.748747	5.23e-06	0.000100837	-5.28137	9.07	9.36	11.18	12.37	6.12	5.12	4.87	4.7	6.24	6.09	5.44	5.52
ENSG00000157510.14	AFAP1L1	1.29476	0.37269	0.000469549	0.00209897	3.32832	1.18784	0.248337	0.00597546	0.0199124	2.22363	20.9	23.31	20.41	20.57	27.15	24.56	23.87	25.46	21.83	21.95	21.75	22.49
ENSG00000169129.15	AFAP1L2	-1.50585	-0.590581	4.17e-07	1.3e-05	-6.37965	1.18558	0.245598	0.000246409	0.00166409	3.60834	18.83	19.36	19.97	21.37	12.46	13.08	12.58	13.41	22.58	22.14	23.3	22.99
ENSG00000130396.20	AFDN	1.14085	0.190109	0.00461675	0.0132137	2.33566	1.02857	0.040647	0.459351	0.575205	0.337856	55.47	59.79	60.45	61.5	69.64	69.79	69.42	68.58	65.85	58.34	58.18	61.36
ENSG00000172493.20	AFF1	1.088	0.121683	0.563134	0.657132	0.249388	1.10426	0.14308	0.424689	0.544288	0.371929	5.47	5.27	8.77	8.36	7.69	8.3	6.51	6.17	6.98	6.79	6.14	8.23
ENSG00000072364.13	AFF4	1.01459	0.0208938	0.874034	0.908136	0.0584715	-1.04873	-0.0686481	0.517523	0.628893	-0.28607	21.73	20.21	28.38	34.56	24.37	26.91	22.63	25.56	22.22	22.51	21.09	20.34
ENSG00000135537.16	AFG1L	1.16154	0.216044	0.0894493	0.150564	1.04842	1.12866	0.174607	0.10247	0.185523	0.989402	1.94	1.77	1.62	1.94	1.54	1.67	1.55	2.69	2.4	1.63	1.92	1.33
ENSG00000223959.8	AFG3L1P	-1.47818	-0.563826	6.05e-06	7.93e-05	-5.21844	1.10714	0.146842	0.0292286	0.0692994	1.53419	24.71	23.55	28.71	28.54	17.44	15.22	15.5	17.48	28.95	28.34	26.25	26.8
ENSG00000141385.9	AFG3L2	1.09294	0.128216	0.0569639	0.10405	1.2444	1.03521	0.0499169	0.369842	0.491933	0.431984	36.28	35.94	32.52	33.45	35.53	39.14	37.23	40.15	35.62	34.6	34.44	35.38
ENSG00000183077.15	AFMID	1.00422	0.00606884	0.935843	0.954892	0.028797	1.18216	0.241429	0.00517499	0.0177593	2.28609	9.17	8.49	8.94	9.26	7.02	8.52	7.64	9.18	9.6	10.14	9.72	9.43
ENSG00000081051.7	AFP	4.27949	2.09744	0.00159448	0.00562935	2.79738	5.32986	2.4141	0.000898043	0.00448657	3.0467	1.09	0.78	0.61	0.17	1.71	2.75	2.35	2.73	2.75	2.32	1.97	2.33
ENSG00000119844.15	AFTPH	1.05708	0.0800899	0.229415	0.322156	0.639378	1.07222	0.100596	0.123635	0.215825	0.907858	39.14	36.24	34.28	34.23	35.27	36.27	37.82	38.08	39.28	37.18	37.89	38.31
ENSG00000038002.9	AGA	1.4238	0.509742	0.00134367	0.00488886	2.87171	-1.1015	-0.139463	0.21925	0.333262	-0.65906	12.93	17.38	13.7	13.88	16.05	19.87	22.09	20.68	10.89	11.31	12.59	13.6
ENSG00000157985.19	AGAP1	-1.25309	-0.325494	0.00330955	0.010118	-2.48023	1.23744	0.307355	0.00484098	0.0168554	2.31507	8.22	9.34	9.22	10.47	8.48	7.77	7.86	7.53	11.56	10.84	10.44	10.28
ENSG00000271880.1	AGAP11	1.0453	0.0639135	0.836419	0.879846	0.0775759	-2.77961	-1.47488	0.00137701	0.00624359	-2.86106	0.22	0.22	0.2	0.22	0.14	0.22	0.2	0.36	0.14	0.02	0.04	0.06
ENSG00000265018.6	AGAP12P	-1.00141	-0.00203008	0.988493	0.991924	-0.00502631	1.02016	0.028795	0.824435	0.879389	0.0838436	1.56	1.29	1.75	2.03	1.94	1.61	1.33	1.41	1.35	1.47	1.62	1.55
ENSG00000235529.1	AGAP1-IT1	1.13607	0.184054	0.421608	0.523834	0.375092	2.01518	1.01091	0.00144145	0.00647586	2.8412	1.24	0.89	1.04	1.21	1.43	1.39	0.82	1.26	1.62	2.5	1.44	2.09
ENSG00000135439.11	AGAP2	-2.76717	-1.46841	0.000224146	0.00117448	-3.64947	-2.63093	-1.39557	0.000138339	0.001085	-3.85905	0.44	0.26	0.26	0.51	0.15	0.06	0.07	0.12	0.05	0.1	0.1	0.08
ENSG00000255737.2	AGAP2-AS1	1.06382	0.0892587	0.381905	0.484212	0.418045	1.04708	0.0663712	0.547686	0.655289	0.261469	8.42	8.23	7.38	6.95	8.5	7.05	7.85	7.66	6.5	7.8	8.31	7.51
ENSG00000133612.19	AGAP3	-1.73913	-0.798369	5.59e-07	1.53e-05	-6.2522	1.00299	0.00431251	0.952604	0.970076	0.0210876	22.65	24.01	24.63	32.18	15.59	13.92	14.86	14.35	21.64	26.15	25.61	24.7
ENSG00000188234.13	AGAP4	-1.30749	-0.386797	0.00055427	0.00239439	-3.25628	-1.08705	-0.120413	0.188655	0.29648	-0.724331	4.81	5.46	9.29	9.18	6.05	5.25	5.07	3.69	5.98	4.18	4.93	7.12
ENSG00000172650.13	AGAP5	-1.25691	-0.329885	0.0386799	0.0759295	-1.41251	1.26556	0.339776	0.0609306	0.123373	1.21516	2.26	3.02	2.9	3.16	2.38	2.44	2.35	2.46	3.71	3.62	2.89	2.67
ENSG00000204149.11	AGAP6	-1.14982	-0.201407	0.127361	0.200906	-0.894965	1.09037	0.124813	0.300188	0.422161	0.522607	3.77	4.41	5.42	5.08	4.48	3.83	3.52	3.52	4.88	4.07	4.54	4.7
ENSG00000264204.2	AGAP7P	-1.23917	-0.309372	0.334683	0.437181	-0.475366	-1.32078	-0.401386	0.255586	0.37436	-0.592463	0.22	0.16	0.45	0.37	0.3	0.29	0.13	0.17	0.16	0.17	0.24	0.1
ENSG00000204172.12	AGAP9	-1.10696	-0.146605	0.27918	0.37725	-0.554116	1.2852	0.361995	0.0094623	0.0284586	2.024	3.96	4.24	5.5	5.92	4.58	4.61	3.42	3.88	5.5	6.18	5.19	6.15
ENSG00000165923.16	AGBL2	-3.06919	-1.61786	1.15e-06	2.46e-05	-5.94003	-1.3225	-0.403263	0.00782908	0.0244967	-2.10629	1.86	1.16	1.44	2.11	0.34	0.56	0.36	0.86	1.15	0.75	0.96	0.87
ENSG00000146856.14	AGBL3	-1.30048	-0.379039	0.0252888	0.053572	-1.59707	1.15078	0.202616	0.322964	0.445458	0.490846	1.1	1.4	1.32	1.68	0.82	1.01	0.59	0.81	1.58	0.88	1.22	1.4
ENSG00000084693.16	AGBL5	-1.68281	-0.75087	1.21e-06	2.53e-05	-5.91848	-1.02301	-0.0328224	0.639234	0.732458	-0.19434	12.74	11.64	11.07	11.23	6.85	7.25	6.88	7.1	10.6	11.2	12.02	11.9
ENSG00000204305.14	AGER	-1.54858	-0.630945	0.013159	0.0314197	-1.88078	1.32188	0.402593	0.0277371	0.066413	1.55694	1.38	1.24	1.51	1.11	0.84	0.76	0.69	0.91	1.76	1.23	1.53	1.4
ENSG00000173744.17	AGFG1	-1.23895	-0.309115	3.33e-05	0.000272526	-4.47742	1.29466	0.372576	3.17e-06	7.07e-05	5.49863	32.72	30.5	26.31	26.15	23.72	23.33	23.26	24.95	37.09	38.58	39.55	39.76
ENSG00000106351.13	AGFG2	-1.66577	-0.736188	2.12e-07	8.45e-06	-6.6729	-1.1892	-0.249993	0.00205159	0.0085708	-2.68791	9.05	9.46	8.58	9.27	6.15	6.12	6.35	6.33	7.71	7.12	7.11	7.13
ENSG00000164252.13	AGGF1	-1.03367	-0.0477728	0.497506	0.595969	-0.303202	1.0014	0.00201864	0.972447	0.982709	0.0121343	8.63	8.93	8.1	8.07	8.02	7.65	8.57	7.69	8.1	8.28	8.23	8.08
ENSG00000006530.17	AGK	-1.47337	-0.559115	8.74e-07	2.03e-05	-6.05858	1.17968	0.238394	0.000915424	0.00455065	3.03838	21.41	20.93	20	20.16	15.5	14.74	12.06	13.96	26.52	23.99	21.27	23.73
ENSG00000162688.17	AGL	-1.12697	-0.172451	0.0602834	0.10919	-1.2198	1.16063	0.214912	0.0197828	0.0509038	1.70371	7.76	8.27	10.01	9.82	7.81	8.6	6.8	7.26	10.73	9.05	9.52	9.85
ENSG00000116771.6	AGMAT	1.56169	0.64311	1.38e-05	0.000143192	4.85856	1.27322	0.34848	0.000931238	0.00460636	3.03094	3.53	3.72	3.3	3.3	5.03	4.88	5.1	5.35	4.23	4.05	4.1	3.98
ENSG00000092847.12	AGO1	1.03034	0.0431235	0.719987	0.790112	0.142675	-1.18529	-0.245246	0.0138607	0.038437	-1.85822	6.3	6.16	7.3	8.91	7.82	7.36	6.03	6.36	5.97	4.95	5.52	5.47
ENSG00000123908.12	AGO2	-1.03459	-0.0490584	0.774651	0.833297	-0.110894	-1.0915	-0.126307	0.383953	0.505531	-0.415722	25.02	25.19	31.72	34.11	30.28	27.41	25.19	23.82	23.93	24.52	21.43	24.92
ENSG00000126070.20	AGO3	1.06275	0.0878045	0.335728	0.438334	0.474012	-1.12265	-0.166906	0.0651843	0.13006	-1.18586	9.31	7.61	10.65	9.67	10.34	11.74	10.1	10.09	8.73	8.29	9.21	9.78
ENSG00000134698.11	AGO4	-1.14778	-0.198841	0.00439851	0.0127013	-2.35669	1.02542	0.0362108	0.513714	0.625786	0.289279	5	4.92	5.24	3.63	4.58	3.17	3.43	3.93	5.56	3.68	3.4	5.14
ENSG00000204310.13	AGPAT1	-1.36051	-0.444148	2.62e-05	0.000228404	-4.58223	-1.28477	-0.36151	0.000111108	0.000922076	-3.95425	19.63	18.98	17.97	18.76	12.77	12.88	13.81	13.45	13.18	14.12	14.59	13.1
ENSG00000169692.13	AGPAT2	1.18067	0.239604	0.0041803	0.0121732	2.37879	1.1786	0.23708	0.00967837	0.0290006	2.0142	16.1	15.81	15.76	18.25	20.28	18.04	18.78	19.02	17.16	19.73	20.47	18.14
ENSG00000160216.19	AGPAT3	-1.71054	-0.774449	9.52e-07	2.14e-05	-6.02127	-2.03835	-1.0274	5.08e-08	4.3e-06	-7.29413	7.73	8.08	8.42	11.34	4.49	4.01	4.12	4.53	3.98	4.6	3.93	4.09
ENSG00000026652.14	AGPAT4	2.0079	1.00569	3.5e-05	0.000282341	4.45552	1.88178	0.912098	3.17e-05	0.000363332	4.49871	0.7	0.63	0.36	0.45	0.97	0.62	0.88	0.99	1.07	1.26	0.82	0.95
ENSG00000279355.1	AGPAT4-IT1	1.64519	0.718253	0.0207569	0.0455572	1.68284	1.76095	0.816353	0.0394585	0.0877406	1.40386	0.22	0.16	0.26	0.15	0.37	0.39	0.26	0.22	0.36	0.26	0.15	0.39
ENSG00000155189.12	AGPAT5	1.48575	0.571193	2.72e-05	0.000234699	4.56533	1.03444	0.0488488	0.463343	0.579206	0.334097	14.51	15.25	13.34	12.81	18.97	19.96	20.29	22.66	14.56	13.13	14.14	13.14
ENSG00000018510.15	AGPS	-1.28344	-0.360017	0.000173623	0.000956819	-3.76039	-1.05669	-0.0795543	0.132972	0.228384	-0.87624	38.16	40.37	37.59	38.35	29.48	30.94	30.02	32.53	37.03	38.21	35.39	37.92
ENSG00000188157.15	AGRN	-1.05562	-0.0780948	0.799663	0.851911	-0.0970931	1.03121	0.0443441	0.880016	0.92048	0.0555093	16.4	20.16	29.65	45.24	30.7	25.64	25.37	23.25	27.06	27.44	26.33	29.42
ENSG00000135049.15	AGTPBP1	1.39815	0.483514	6.51e-06	8.38e-05	5.1861	1.58654	0.665888	1.79e-07	1.07e-05	6.74683	9.1	9.45	9.63	9.44	13.28	12.66	12.43	13.29	14.4	13.83	14.09	13.99
ENSG00000177674.16	AGTRAP	-1.45818	-0.544172	0.000177676	0.000976164	-3.75037	-1.07148	-0.0996074	0.311895	0.434556	-0.505991	21.75	20.29	18.67	17.96	12.32	12.3	13.75	12.41	15.26	17.96	18.71	16.64
ENSG00000153207.15	AHCTF1	1.19147	0.252748	0.000323168	0.00156285	3.49057	1.11523	0.157336	0.00316332	0.0120247	2.49986	22.64	22.83	23.16	24.19	27.68	28.84	24.78	26.77	26.95	25.21	23.63	26.6
ENSG00000101444.13	AHCY	-1.38854	-0.473572	2.64e-05	0.000229909	-4.57844	-1.06352	-0.0888467	0.14294	0.241129	-0.844845	275.69	266.21	241.87	229.78	179.64	179.27	188.92	187.84	232.32	238.11	242.15	236
ENSG00000168710.18	AHCYL1	1.02003	0.0286172	0.616164	0.705302	0.210303	-1.20048	-0.263615	0.000482621	0.00277829	-3.31639	24.89	24.51	29.37	28.97	27.48	27.89	25.68	27.28	21.71	21.41	21.77	21.6
ENSG00000158467.16	AHCYL2	-1.23256	-0.301652	0.00104188	0.00396731	-2.98218	1.07145	0.0995611	0.144678	0.243264	0.839599	6.47	7.75	11.34	10.93	7.25	7.82	6.29	6.72	8.43	8.13	8.09	10.35
ENSG00000126705.14	AHDC1	1.11451	0.156413	0.576326	0.669006	0.239332	-1.05051	-0.0710917	0.798714	0.859663	-0.0976087	1.51	1.69	2.51	4.51	2.53	2.4	2.51	2.1	1.91	1.99	1.69	1.98
ENSG00000135541.21	AHI1	-1.05507	-0.0773415	0.327772	0.429748	-0.484428	-1.07178	-0.100002	0.154964	0.255879	-0.809769	14.6	13.2	16.4	14.94	15.49	16.65	11.82	14.73	14.53	12.43	10.82	12.01
ENSG00000124942.14	AHNAK	-1.04595	-0.0648108	0.575346	0.668204	-0.240071	1.02028	0.02897	0.751172	0.821797	0.124261	146.05	149.37	199.13	207.07	197.08	202.27	153.95	157.34	175.49	159.54	156.51	169.22
ENSG00000185567.7	AHNAK2	1.21329	0.278927	0.0580823	0.105759	1.23596	1.29457	0.37247	0.0105422	0.0309626	1.97707	43.99	46.85	60.01	56.28	66.58	69.86	64.97	69.31	71.18	65.04	68.2	73.04
ENSG00000106546.14	AHR	1.35499	0.438282	0.000101247	0.00063342	3.99462	1.44928	0.535336	5.51e-07	2.27e-05	6.25876	9.63	10.63	10.99	10.29	12.69	13.65	14.24	14	15.04	13.89	12.33	12.67
ENSG00000063438.17	AHRR	1.54133	0.624178	0.0429089	0.0827464	1.36745	1.21955	0.286354	0.312904	0.43543	0.504589	0.5	0.78	1.11	1.56	1.7	1.47	1.76	1.29	1.27	1.09	1.05	0.89
ENSG00000286169.1	AHRR	1.37916	0.463788	0.00158735	0.00561399	2.79933	1.35398	0.437202	0.000683297	0.00363516	3.16539	1.5	1.29	1.64	1.96	2.34	2.04	1.52	1.73	2.16	2.35	1.77	1.99
ENSG00000100591.8	AHSA1	1.20481	0.268802	0.00125044	0.00459195	2.90294	1.19513	0.257162	0.000463817	0.0026933	3.33365	284.96	278.51	267.15	259.62	306.25	322.32	353.44	357.18	329.3	315.13	331.4	324.39
ENSG00000173209.23	AHSA2P	-1.41968	-0.505563	2.26e-05	0.000205952	-4.64582	1.00961	0.0137967	0.826253	0.880661	0.082887	22.07	22.4	25.65	26	15.9	16.05	15.34	15.13	25.16	21.99	21.62	22.93
ENSG00000186063.13	AIDA	1.0063	0.0090645	0.968335	0.978742	0.0139742	-1.23819	-0.308237	0.153982	0.254652	-0.812529	21.76	22.32	37.83	42.16	35.11	34.28	23.75	26.52	26.01	21.66	22.32	23.6
ENSG00000126878.13	AIF1L	1.54407	0.626737	0.00263882	0.00844538	2.57859	1.19537	0.257456	0.124319	0.216759	0.905462	0.93	1.07	0.94	0.87	1.16	1.4	1.53	1.64	0.95	0.93	1.18	0.85
ENSG00000156709.14	AIFM1	1.16193	0.216527	0.000691572	0.00286082	3.16016	-1.08985	-0.124125	0.0121867	0.0348267	-1.91411	23.03	22.24	24.81	26.79	27.71	25.2	24.59	26.84	21.68	16.98	18.85	20.52
ENSG00000042286.15	AIFM2	-1.73891	-0.798185	4.23e-05	0.000325763	-4.37373	-1.46655	-0.552429	0.000379933	0.00231286	-3.42029	4.31	3.69	5.24	5.41	2.44	2.89	2.39	2.43	3.01	2.81	2.93	2.92
ENSG00000183773.15	AIFM3	-1.25429	-0.326867	0.25197	0.34744	-0.598652	1.29386	0.371684	0.0977643	0.179101	1.00982	0.73	0.5	0.55	0.72	0.2	0.37	0.53	0.41	0.57	0.57	0.42	0.73
ENSG00000146416.18	AIG1	1.15489	0.207752	0.0186803	0.0418331	1.72862	1.07522	0.104627	0.193868	0.302886	0.712493	26.59	26.21	28.13	27.13	28.4	29.78	29.31	29.58	25.21	27.35	26.64	28.33
ENSG00000163568.15	AIM2	-1.02253	-0.0321493	0.695959	0.771019	-0.157416	-1.21116	-0.276385	0.00729535	0.0231805	-2.13695	10.01	10.68	9.65	9.58	8.73	9.73	9.47	10.08	7.33	7.74	8.33	7.28
ENSG00000164022.16	AIMP1	1.17078	0.227468	0.0728364	0.127244	1.13765	1.10494	0.143972	0.170016	0.27447	0.76951	26.87	21.69	23.85	21.72	25.97	33.81	27.21	30.99	26.02	24.57	22.51	24.11
ENSG00000234187.1	AIMP1P1	1.80987	0.855889	0.0831157	0.141805	1.08032	3.01709	1.59316	0.00305325	0.0117036	2.51524	0.21	0.49	0.59	0.16	0.72	0.44	0.36	0.87	0.7	0.65	0.71	0.84
ENSG00000106305.10	AIMP2	1.23369	0.302985	0.0194026	0.0431639	1.71214	-1.02391	-0.0340861	0.748747	0.819896	-0.125665	38.8	40.78	33.29	30.07	39.82	42.38	45.54	44.4	32.04	34.95	33.48	33.65
ENSG00000110711.10	AIP	1.10267	0.141001	0.146464	0.223949	0.834269	-1.10954	-0.149963	0.0881065	0.16524	-1.05499	40.57	40.23	34.81	32.78	38.61	36.58	42.56	41.36	31.22	32.19	32.82	32.18
ENSG00000232434.2	AJM1	-1.31399	-0.393953	0.182444	0.267593	-0.738869	1.04304	0.0607933	0.781678	0.84665	0.106972	0.23	0.22	0.17	0.22	0.14	0.11	0.23	0.15	0.16	0.18	0.25	0.18
ENSG00000129474.16	AJUBA	1.00761	0.0109393	0.79945	0.851768	0.0972089	1.31647	0.396671	3.85e-06	8.17e-05	5.4151	65.61	64.93	61.35	66.8	67.35	63.25	63.14	65.5	77.18	81.8	81.36	84.17
ENSG00000106992.19	AK1	1.22941	0.297969	0.0115138	0.0281771	1.93878	1.09139	0.126164	0.215277	0.328346	0.667003	32.4	35.26	25.62	29.28	35.44	36.47	35.35	38.95	29.76	32.95	34.96	29.4
ENSG00000004455.16	AK2	1.00405	0.00582537	0.937919	0.95648	0.0278346	1.04874	0.0686531	0.326796	0.449443	0.485723	180.69	172.9	159.88	156.03	153.02	156.55	176.43	172.15	171.55	169.94	171.71	167.64
ENSG00000147853.17	AK3	1.41084	0.496551	1.4e-05	0.000144157	4.85481	1.28508	0.361858	5.06e-05	0.000513025	4.29593	8.53	7.75	7.95	7.95	10.07	11.79	11.5	11.29	10.09	10.15	9.67	9.58
ENSG00000230042.1	AK3P3	-1.38807	-0.473078	0.114201	0.183745	-0.942332	1.08383	0.11614	0.615992	0.713615	0.210425	0.79	1	1.71	1.47	1.12	0.94	0.87	0.46	1.33	1.08	0.9	1.1
ENSG00000162433.15	AK4	1.05486	0.0770475	0.0984932	0.162991	1.00659	1.15418	0.206873	0.000401419	0.00241473	3.3964	34.85	33.85	34.15	34.22	33.21	38.48	32.31	37.83	41.8	40.13	37.06	38.83
ENSG00000263535.2	AK4P1	1.13004	0.176369	0.310326	0.410933	0.508182	1.17911	0.237702	0.23174	0.347751	0.634999	2.03	1.87	2.71	1.78	2.33	2.09	2.21	2.4	1.94	1.95	2.03	2.89
ENSG00000085231.14	AK6	1.14387	0.193925	0.245971	0.340735	0.609116	1.15992	0.214028	0.162759	0.265488	0.788455	10.87	10.09	9.52	7.82	9.15	8.93	10.34	10.04	10.31	9.34	10.05	8.99
ENSG00000155085.15	AK9	1.15539	0.208378	0.211875	0.302671	0.67392	1.18466	0.244477	0.126035	0.219201	0.899508	1.82	1.32	1.17	1.75	1.66	1.05	1.43	1.6	1.79	1.64	0.98	1.22
ENSG00000121057.13	AKAP1	1.15962	0.213656	0.00221498	0.00734442	2.65463	1.02011	0.0287245	0.520482	0.631294	0.283594	23.63	25.75	29.53	28.24	31.73	29.95	28.71	27.52	28.76	24.5	28.16	28.21
ENSG00000108599.15	AKAP10	1.09361	0.129097	0.0241691	0.0515711	1.61674	1.04772	0.067247	0.179761	0.28573	0.745305	8.77	8.6	9.92	10.05	11.04	10.52	10.43	10.01	9.8	9.37	8.42	8.58
ENSG00000023516.9	AKAP11	1.06781	0.09466	0.501273	0.59955	0.299926	-1.19076	-0.251888	0.0453415	0.0978035	-1.3435	5.16	5.29	7.17	7.14	7.34	7.39	5.39	5.77	5.51	4.63	4.68	5.08
ENSG00000131016.17	AKAP12	-2.35672	-1.23678	2.17e-10	1.56e-07	-9.66338	-1.12172	-0.165719	0.00445256	0.0157708	-2.35139	10.35	10.32	10.86	10.8	4.27	4.55	4.32	4.53	9.91	8.96	8.87	9.6
ENSG00000170776.21	AKAP13	1.3527	0.435839	0.00235293	0.00769678	2.62839	1.00181	0.00260554	0.976247	0.984869	0.0104404	21.2	22.59	32.02	30.95	37.66	38.28	28.87	33.28	25.23	25.53	24.75	25.84
ENSG00000197976.12	AKAP17A	1.13164	0.178415	0.0432611	0.0833064	1.3639	1.27724	0.353027	0.000437404	0.00256885	3.35912	2.84	3.25	3.2	3.37	3.54	3.03	3.35	3.41	3.67	3.97	3.64	3.56
ENSG00000197976.12_PAR_Y	AKAP17A	1.13164	0.178415	0.0432611	0.0833064	1.3639	1.27724	0.353027	0.000437404	0.00256885	3.35912	2.84	3.25	3.2	3.37	3.54	3.03	3.35	3.41	3.67	3.97	3.64	3.56
ENSG00000241978.9	AKAP2	1.2164	0.282622	0.000634747	0.00267012	3.1974	1.54458	0.627213	4.18e-07	1.88e-05	6.37847	91.11	91.62	86.32	88.02	108.12	110.99	109.09	111.54	135.35	130.64	128.51	129.28
ENSG00000179841.8	AKAP5	1.58963	0.668688	0.000550822	0.00238395	3.25899	1.27827	0.354195	0.00651385	0.0212269	2.18616	0.66	0.83	0.83	0.95	1.53	1.21	1.03	0.99	0.88	0.84	0.83	0.96
ENSG00000151320.11	AKAP6	1.43155	0.517575	0.0159092	0.0367403	1.79835	1.45213	0.538169	0.00337762	0.0126766	2.47139	0.61	0.43	0.87	0.96	0.94	1.2	0.59	0.79	1	0.98	0.62	0.89
ENSG00000118507.17	AKAP7	-1.25294	-0.325312	0.0864453	0.14639	-1.06326	-1.14104	-0.190354	0.344232	0.466957	-0.463149	0.42	0.68	0.78	1.1	0.65	0.47	0.84	0.51	0.62	0.39	0.4	0.89
ENSG00000105127.9	AKAP8	1.08513	0.117869	0.0614882	0.110851	1.21121	1.11065	0.151402	0.0308264	0.0722098	1.51108	11.95	12.2	11.54	11.03	12.74	12.13	13.3	12.31	12.15	13.49	12.81	13.1
ENSG00000011243.18	AKAP8L	1.1537	0.206266	0.0169566	0.0386663	1.77066	1.05476	0.0769081	0.289109	0.410133	0.538938	30.21	33.46	29.02	29.81	36.12	32.38	34.99	35.08	30.82	33.6	29.99	30.36
ENSG00000127914.16	AKAP9	-1.46941	-0.555239	3.4e-07	1.13e-05	-6.46911	1.09259	0.12775	0.0304401	0.0715459	1.51655	50.97	53.02	55.18	49.8	35.52	36.64	37.43	38.03	62.71	54.67	55.37	60.51
ENSG00000166452.11	AKIP1	-1.13869	-0.187378	0.170577	0.253562	-0.768079	-1.54121	-0.624065	0.000337993	0.00212218	-3.47109	16.35	17.54	17.94	14.69	10.64	13.56	13.5	14.55	12.25	9.58	8.84	10.49
ENSG00000174574.16	AKIRIN1	1.03531	0.0500585	0.437161	0.538052	0.359358	1.18271	0.24209	0.000523027	0.00294048	3.28148	27.42	26.52	25.92	25.13	25.49	26.16	26.58	28.65	29.98	29.29	30.53	30.42
ENSG00000135334.9	AKIRIN2	-1.05784	-0.0811166	0.711728	0.783491	-0.147686	-1.10723	-0.146952	0.479824	0.594234	-0.318918	5.69	6.51	9.58	12.18	7.18	7.93	6.07	6.33	6.99	6.77	7.6	6.31
ENSG00000106948.16	AKNA	1.03762	0.0532799	0.675671	0.755041	0.170265	-1.20983	-0.274804	0.0486096	0.103263	-1.31328	3.23	3.16	4.12	5.34	3.99	3.43	4.5	4.11	3.39	3.09	3.31	2.89
ENSG00000117448.13	AKR1A1	-1.00535	-0.00769597	0.935585	0.95487	-0.0289166	-1.04444	-0.0627326	0.462269	0.578134	-0.335105	43.76	42.66	38.96	35.25	33.71	35.19	40.22	42.74	34.09	38.82	38.69	37.4
ENSG00000085662.14	AKR1B1	-2.21465	-1.14708	7.43e-10	2.73e-07	-9.12904	-1.24168	-0.312292	8.56e-05	0.000752265	-4.0677	48.66	45.66	46.08	46.9	20.74	20.3	20.7	21.43	35.21	36.41	37.86	40.16
ENSG00000187134.14	AKR1C1	-4.92525	-2.3002	2.22e-05	0.000203052	-4.65418	1.86973	0.902829	0.00133093	0.00607967	2.87584	0.29	0.64	0.48	0.4	0.27	0.12	0.06	0.05	0.58	0.65	0.93	0.79
ENSG00000196139.14	AKR1C3	1.14035	0.189473	0.435365	0.536371	0.361147	-6.26606	-2.64756	1.65e-05	0.000223387	-4.78255	0.99	1.18	1.31	1.06	0.95	1.01	1.64	1.39	0.07	0.17	0.04	0.35
ENSG00000165568.18	AKR1E2	-1.06904	-0.0963146	0.640959	0.72648	-0.19317	-1.10444	-0.14331	0.47821	0.592828	-0.320381	0.73	0.81	1.28	1.13	0.81	0.85	1.04	0.6	1.15	0.54	0.64	0.8
ENSG00000053371.12	AKR7A2	-1.23917	-0.309369	0.00340976	0.0103793	-2.46728	-1.10815	-0.148149	0.0691638	0.136467	-1.16012	32.28	30.46	27.61	27.42	22.04	22.91	24.78	23.52	25.3	24.81	26.87	25.69
ENSG00000211454.14	AKR7L	1.18173	0.240903	0.540017	0.63607	0.267592	-1.01098	-0.015748	0.968501	0.980208	-0.0138998	0.4	0.43	0.19	0.77	0.92	0.35	0.44	0.33	0.45	0.26	0.35	0.38
ENSG00000142208.16	AKT1	1.1195	0.162858	0.00733213	0.0194454	2.13477	1.07098	0.0989337	0.0397275	0.0881902	1.40091	92.35	94.46	87.13	91.7	102.68	101.03	101.72	96.38	93.49	97.07	96.18	94.61
ENSG00000204673.10	AKT1S1	1.11212	0.153307	0.0311973	0.0636986	1.50588	-1.14419	-0.194325	0.0158108	0.0425954	-1.80105	12.41	13.44	12.2	13.64	13.98	13.07	14.75	14.05	10.53	12.06	11.56	10.62
ENSG00000105221.17	AKT2	1.07418	0.103235	0.139183	0.215605	0.856415	1.17405	0.231497	0.00382314	0.0139876	2.41758	34.23	36.49	34.51	38.23	42.62	37.68	38.32	43.55	43.24	39.98	40.27	42.63
ENSG00000117020.17	AKT3	1.0387	0.0547845	0.496194	0.594749	0.304349	-1.00147	-0.00212488	0.97618	0.984869	-0.01047	20.53	21.33	21.37	24.36	23.39	24.35	20.33	20.51	23.26	21.3	20.03	20.29
ENSG00000166971.17	AKTIP	-2.53621	-1.34268	1.34e-08	1.63e-06	-7.87402	-1.04942	-0.0695911	0.252458	0.370875	-0.597811	12.9	12.83	11.33	13.98	4.86	4.65	5	5.04	10.19	10.35	11.11	11.4
ENSG00000272977.1	AL008721.2	-1.28832	-0.365494	0.269091	0.36603	-0.570101	-1.15862	-0.212408	0.433863	0.552107	-0.362648	0.99	1.18	2.26	2.46	1.58	1.68	0.79	0.92	1.45	1.31	0.95	1.3
ENSG00000215022.7	AL008729.1	1.15932	0.213282	0.483885	0.582973	0.315258	-1.32087	-0.401484	0.266583	0.385955	-0.574167	0.14	0.29	0.38	0.43	0.33	0.38	0.3	0.36	0.14	0.09	0.19	0.17
ENSG00000272379.1	AL008729.2	-1.41067	-0.496377	0.03481	0.0697191	-1.4583	1.08506	0.117778	0.561253	0.667527	0.250841	3.02	3.68	5.62	5.09	3.79	2.82	2.3	2.86	5.39	3.59	3.63	3.94
ENSG00000227008.2	AL009174.1	1.17643	0.234421	0.133686	0.208909	0.873914	1.39412	0.479352	0.00980604	0.0292705	2.00851	9.7	13.69	12.05	9.28	12.82	13.7	11.8	12.6	14.19	15.23	12.12	14.83
ENSG00000281706.2	AL009179.1	1.0341	0.0483736	0.803421	0.854359	0.095057	1.13533	0.183111	0.3388	0.461191	0.470057	1.79	2.01	1.6	2.91	2.65	2.03	2.26	1.59	1.53	1.87	2.17	2.06
ENSG00000213062.4	AL021068.1	1.10563	0.144864	0.574389	0.667235	0.240794	-1.22553	-0.293409	0.291943	0.413311	-0.534701	1.18	0.7	1.13	0.68	1.2	1.08	0.8	0.83	0.68	0.6	0.53	0.65
ENSG00000272316.1	AL021368.2	-1.19683	-0.25922	0.044176	0.0847209	-1.35481	-1.51212	-0.59657	2.31e-05	0.000288002	-4.63662	1.2	1.38	1.46	1.54	1.27	1.26	0.9	0.98	0.78	0.83	0.79	0.9
ENSG00000234869.1	AL021392.1	-3.26191	-1.70572	0.00222954	0.00738014	-2.65178	-2.27876	-1.18825	0.0146735	0.0401057	-1.83347	0.25	0.1	0.26	0.27	0.08	0.03	0.05	0.05	0.06	0.04	0.06	0.1
ENSG00000275894.1	AL021578.1	-1.14271	-0.192457	0.157852	0.238168	-0.801751	1.0627	0.0877308	0.474006	0.588808	0.324216	3.34	2.99	3.46	4.09	2.68	3.11	3.12	2.87	3.69	3.28	2.97	3.17
ENSG00000284431.1	AL022238.4	1.97824	0.984217	0.392685	0.495323	0.405955	2.70937	1.43796	0.196442	0.305653	0.706765	0.15	0.08	0.23	0	0.04	0.14	0.22	0.11	0.12	0.25	0.19	0.06
ENSG00000279738.1	AL022311.1	1.30086	0.37946	0.00106256	0.00402713	2.97365	1.17236	0.22941	0.00519436	0.0178067	2.28447	0.51	0.58	0.54	0.55	0.77	0.69	0.62	0.61	0.6	0.6	0.57	0.61
ENSG00000272720.1	AL022322.1	1.47198	0.557763	0.069344	0.12233	1.15899	1.00403	0.00580835	0.982815	0.989249	0.00752806	0.58	0.57	0.87	1.5	1.37	1.52	0.8	1.09	0.73	0.55	0.81	0.72
ENSG00000231466.2	AL022324.2	-1.47456	-0.560286	0.0276957	0.0577192	-1.55759	-1.66176	-0.732714	0.0143987	0.0395591	-1.84168	1.13	1.43	1.33	2.32	1.16	0.91	1.02	0.78	0.93	0.92	0.73	0.53
ENSG00000273253.2	AL022328.4	-1.1844	-0.244162	0.351355	0.453868	-0.454254	-1.32391	-0.404804	0.0773096	0.148827	-1.11177	0.66	0.59	0.65	0.64	0.33	0.63	0.63	0.47	0.34	0.5	0.37	0.32
ENSG00000277581.1	AL023803.3	-1.21692	-0.283234	0.44495	0.545689	-0.351689	-1.23088	-0.299693	0.311131	0.433641	-0.507057	1.13	2.6	2.41	2.06	2.73	2.15	0.8	1.3	1.56	1.45	1.59	0.94
ENSG00000270638.1	AL023806.1	1.38327	0.468078	0.0973712	0.161464	1.01157	1.25072	0.322754	0.226384	0.341891	0.645154	0.46	0.34	0.26	0.38	0.47	0.54	0.55	0.35	0.34	0.43	0.38	0.34
ENSG00000280184.2	AL023806.3	1.24698	0.318441	0.0867999	0.146868	1.06148	-1.28596	-0.362847	0.0240583	0.0594562	-1.61873	0.56	0.53	0.68	0.75	0.98	0.67	0.85	0.66	0.49	0.47	0.36	0.43
ENSG00000272476.1	AL024507.2	-1.10302	-0.141463	0.639626	0.725524	-0.194074	1.04957	0.0698005	0.790345	0.853654	0.102183	0.32	0.22	0.24	0.18	0.2	0.15	0.24	0.24	0.18	0.21	0.24	0.21
ENSG00000278987.1	AL031009.1	1.03398	0.048205	0.7638	0.82516	0.117021	1.14118	0.19053	0.169554	0.273917	0.770693	1.27	1.22	1.82	1.94	1.73	1.62	1.15	1.62	1.5	1.57	1.43	1.68
ENSG00000261189.1	AL031058.1	-1.77028	-0.823978	0.0128543	0.0308516	-1.89095	-1.35399	-0.437213	0.154884	0.255773	-0.809993	1.03	0.72	0.92	0.7	0.3	0.6	0.48	0.39	0.35	0.74	0.36	0.64
ENSG00000285665.1	AL031274.1	-1.46213	-0.548072	0.275102	0.372984	-0.560506	-1.23749	-0.307421	0.397791	0.519347	-0.400345	0.63	0.67	1.78	1.87	1.25	1.4	0.46	0.23	0.93	0.75	0.59	0.61
ENSG00000268575.1	AL031282.2	-1.00665	-0.00956524	0.91055	0.936045	-0.0406964	-1.06964	-0.0971282	0.339129	0.461445	-0.469635	0.79	0.8	0.88	0.99	0.83	0.85	0.72	0.84	0.61	0.81	0.74	0.71
ENSG00000238084.4	AL031284.1	-1.38372	-0.468555	0.0801229	0.137685	-1.09624	1.1483	0.199494	0.425054	0.544494	0.371556	1.73	1.44	1.63	1.45	1.06	1.72	0.84	0.74	1.19	2	1.81	1.12
ENSG00000284602.1	AL031432.4	1.05392	0.0757649	0.525533	0.621677	0.2794	1.07641	0.106233	0.390984	0.51251	0.407841	1.12	1.38	1.19	1.19	1.23	1.33	1.17	1.22	1.25	1.18	1.13	1.09
ENSG00000278948.1	AL031587.5	1.03869	0.0547632	0.715536	0.786116	0.145369	1.14596	0.196554	0.188786	0.296626	0.724031	3.16	3.39	4.84	5.11	4.81	4.09	3.31	3.79	4.61	3.7	4	4.61
ENSG00000267882.2	AL031666.2	-1.17468	-0.232266	0.243724	0.338155	-0.613102	-1.09358	-0.129053	0.348331	0.47108	-0.458007	0.8	0.64	0.76	0.85	0.58	0.5	0.81	0.6	0.68	0.61	0.57	0.6
ENSG00000273451.1	AL031666.3	-2.91283	-1.54242	0.0011743	0.00437184	-2.93022	-2.35175	-1.23374	0.0126202	0.0357714	-1.89893	0.36	0.55	0.93	0.83	0.33	0.18	0.15	0.1	0.37	0.17	0.22	0.06
ENSG00000273951.1	AL031667.3	-1.31876	-0.399187	0.184898	0.270604	-0.733067	1.08197	0.113661	0.695946	0.778401	0.157424	1.66	1.58	1.12	0.97	1.01	1.03	0.73	1.11	1	1.33	0.98	1.63
ENSG00000278383.1	AL031673.1	1.73451	0.794524	0.00513365	0.0144329	2.28957	1.29851	0.376852	0.11672	0.206389	0.932856	2.81	1.79	3.39	4.25	5.88	5.68	4.62	3.82	3.36	3.09	3	3.76
ENSG00000261732.1	AL031708.1	-1.22133	-0.288454	0.0260018	0.0548242	-1.585	1.08698	0.120319	0.26418	0.383303	0.5781	0.66	0.71	0.65	0.89	0.62	0.57	0.5	0.58	0.74	0.67	0.7	0.71
ENSG00000226396.1	AL031727.1	-1.4854	-0.570854	0.0324617	0.0658136	-1.48863	-1.1241	-0.168772	0.425123	0.544539	-0.371485	2.22	2.26	2.56	1.88	1.97	1.01	1.18	1.63	1.6	2.01	1.23	1.87
ENSG00000235912.1	AL031729.1	1.08696	0.120299	0.441239	0.542082	0.355326	1.11854	0.161612	0.366822	0.488648	0.435544	22.03	24.04	29.59	23.16	27.54	24.97	25.61	29.41	21.65	26.02	29.19	26.79
ENSG00000272345.1	AL031775.1	1.02235	0.0318857	0.914668	0.938848	0.0387365	1.09436	0.13009	0.672785	0.75962	0.172123	0.5	0.83	1.59	1.1	0.72	1.08	0.9	0.97	1.18	0.78	0.65	0.94
ENSG00000282988.2	AL031777.3	-1.07326	-0.101996	0.392337	0.494961	-0.40634	-1.04814	-0.0678262	0.530894	0.640468	-0.274992	313.52	297.55	242.3	221.37	225.18	223.87	271.35	269.59	228.39	254.16	262.07	253.2
ENSG00000219023.1	AL033519.2	1.15506	0.207974	0.174079	0.257556	0.759254	1.021	0.0299771	0.873244	0.916003	0.0588642	12.67	15.39	13.92	10.83	15.92	13.72	16.19	13.21	11.56	15.39	13.31	9.19
ENSG00000284719.1	AL033527.5	1.22811	0.296441	0.168342	0.250725	0.773807	-1.11225	-0.153486	0.502435	0.615233	-0.29892	0.58	0.67	1.05	1.02	1.13	0.92	0.81	0.81	0.48	0.54	0.65	0.66
ENSG00000214019.2	AL034370.1	-1.29727	-0.375476	0.0837145	0.142661	-1.0772	1.03719	0.0526789	0.7714	0.838147	0.11272	0.66	0.51	0.61	0.6	0.36	0.49	0.48	0.43	0.51	0.66	0.45	0.52
ENSG00000237749.4	AL034379.1	1.27484	0.350311	0.00855093	0.0220213	2.06799	-1.13895	-0.1877	0.0829609	0.157492	-1.08113	73.32	90.23	79.75	71.46	96.08	99.14	107.67	85.67	62.52	64.63	60.96	70.65
ENSG00000284747.1	AL034417.4	1.05788	0.0811746	0.864151	0.900614	0.0634102	1.1578	0.211388	0.590786	0.692252	0.228569	0.2	0.23	0.2	0.69	0.5	0.23	0.14	0.4	0.31	0.16	0.31	0.3
ENSG00000285508.1	AL034430.1	-1.58597	-0.665367	0.719819	0.790035	-0.142777	10.8165	3.43516	0.0169579	0.0450632	1.77063	1.87	1.29	0	0	0.83	0	0.23	0	3.15	1.35	1.74	1.89
ENSG00000285723.1	AL034430.2	1.0026	0.00375167	0.967048	0.977798	0.0145519	1.60891	0.68608	4.78e-06	9.52e-05	5.32055	216.2	212.21	212.63	171.94	194.68	171.58	212.91	217.33	355.2	300.26	314.34	301.89
ENSG00000280395.1	AL034546.1	1.44578	0.531847	0.00169362	0.00591362	2.77118	1.20073	0.263909	0.178042	0.284064	0.749477	0.27	0.27	0.3	0.35	0.46	0.44	0.35	0.39	0.32	0.27	0.24	0.42
ENSG00000260257.2	AL035071.1	-1.30343	-0.382314	0.0671388	0.119102	-1.17303	-1.11579	-0.158069	0.375965	0.497883	-0.424853	3.68	3.93	5.28	6.46	4.42	3.87	2.69	2.99	4.83	3.41	3.3	4.09
ENSG00000285283.1	AL035078.4	-3.19658	-1.67653	0.498697	0.59691	-0.302163	-5.89331	-2.55908	0.241899	0.35912	-0.616366	0	0	2.36	3.96	1.02	0	0	0	0	0	0	0
ENSG00000277938.1	AL035252.3	-1.22467	-0.292399	0.137157	0.212956	-0.862783	1.25859	0.331813	0.0769457	0.148237	1.11382	0.38	0.49	0.61	0.78	0.45	0.48	0.35	0.44	0.54	0.67	0.56	0.67
ENSG00000185839.3	AL035411.1	-1.03506	-0.0497142	0.829677	0.874677	-0.0810912	1.05232	0.0735673	0.738609	0.812145	0.131585	1.28	1.32	0.93	1.28	0.92	1.17	1.26	1.14	1.16	1.25	0.91	1.02
ENSG00000235036.4	AL035456.1	-1.07422	-0.103287	0.577025	0.669577	-0.238806	1.47992	0.565519	0.00828721	0.0255996	2.08159	0.44	0.69	0.67	0.56	0.6	0.54	0.55	0.45	0.71	0.76	0.7	0.89
ENSG00000236456.1	AL035458.1	1.01187	0.0170285	0.94721	0.962971	0.0235537	-1.11997	-0.163463	0.432949	0.551252	-0.363563	1.62	1.59	2.11	1.75	1.93	1.05	1.96	1.99	1.39	1.3	1.66	0.99
ENSG00000275632.1	AL035461.2	-1.35453	-0.437791	0.00600154	0.0164489	-2.22174	1.15133	0.203297	0.123484	0.215656	0.908388	8.8	8.46	8.81	7.38	5.86	5.87	5.7	6.56	8.26	9.87	8.8	7.86
ENSG00000286235.1	AL035461.3	-1.03272	-0.0464553	0.787064	0.842542	-0.10399	1.57858	0.658627	0.00177024	0.00762449	2.75197	4.6	3.86	3.74	2.77	2.85	3.75	3.74	3.4	6.21	5.12	4.89	6.09
ENSG00000231113.2	AL035587.1	1.21755	0.283977	0.190341	0.276918	0.720467	1.53211	0.615518	0.0159659	0.0429049	1.79681	0.74	0.55	0.96	1.04	0.74	0.87	0.94	0.87	1.1	0.88	0.89	1.22
ENSG00000274173.1	AL035661.1	-1.41199	-0.497734	0.00273444	0.00869128	-2.56313	-1.43281	-0.518843	0.000441716	0.00258668	-3.35486	17.63	14.66	14.94	13.3	9.34	9.2	9.97	12.02	10.28	9.3	9.6	10.06
ENSG00000275576.1	AL049539.1	-1.4911	-0.576379	0.0530382	0.0983288	-1.27541	-1.30986	-0.389411	0.141584	0.239447	-0.848986	1.09	1.84	1.68	2.07	0.97	1.54	0.98	0.7	1.32	0.79	0.84	0.96
ENSG00000261116.1	AL049555.1	-4.71274	-2.23657	0.0884505	0.149072	-1.0533	-1.60323	-0.680979	0.520481	0.631294	-0.283595	0.49	0.7	0.48	0.41	0	0	0.94	0.53	0	0.96	0.56	0.66
ENSG00000284969.1	AL049629.2	1.31021	0.389798	0.051843	0.0965149	1.28531	1.11869	0.161815	0.407513	0.528544	0.389859	2.43	2.99	3.79	3.85	3.82	3.7	4.79	3.42	4.15	2.78	2.77	3.28
ENSG00000256566.1	AL049650.1	-2.74419	-1.45638	0.0870952	0.147244	-1.06001	-1.34019	-0.422439	0.262731	0.382171	-0.580489	0.7	1	0.83	0.73	0	0.54	0.67	0.43	0.26	0.85	0.3	0.85
ENSG00000205562.2	AL049775.1	3.65565	1.87013	6.73e-05	0.000461177	4.17194	3.87869	1.95557	3.98e-05	0.000432811	4.3997	0.11	0.12	0.09	0.15	0.44	0.39	0.29	0.52	0.32	0.29	0.33	0.39
ENSG00000279434.1	AL049776.1	1.12525	0.170244	0.659525	0.741604	0.180769	1.43391	0.519953	0.0623675	0.125726	1.20504	0.17	0.26	0.39	0.46	0.49	0.49	0.15	0.33	0.37	0.34	0.3	0.44
ENSG00000258759.1	AL049779.2	1.41115	0.496875	0.0422595	0.0817472	1.37408	2.08773	1.06193	0.000219821	0.00152511	3.65793	0.71	1.12	1.37	1.04	1.33	1.98	1.22	1.31	1.84	2.07	1.64	1.93
ENSG00000279594.1	AL049780.3	1.51165	0.596122	0.0907255	0.152143	1.04227	1.00629	0.00905252	0.977038	0.985542	0.0100887	0.82	0.34	1.1	0.87	1.31	1.34	0.73	0.95	0.57	0.59	0.62	0.69
ENSG00000258526.6	AL049828.1	-1.25076	-0.322804	0.384109	0.4864	-0.415545	-1.10366	-0.142298	0.72386	0.800188	-0.140345	0.47	0.2	0.61	0.72	0.38	0.4	0.28	0.35	0.22	0.4	0.29	0.34
ENSG00000213867.4	AL049830.1	-1.20827	-0.27294	0.175088	0.258631	-0.756743	-1.22136	-0.288486	0.200095	0.310311	-0.698763	8.74	11.57	9.96	8.09	6.94	8.71	9.61	5.97	5.48	9.94	5.63	7.95
ENSG00000258525.1	AL049830.3	1.49715	0.582216	0.034985	0.0699668	1.45612	-1.3046	-0.383604	0.0446599	0.0966313	-1.35008	0.8	0.69	1.09	0.96	1.32	1.78	0.85	1.36	0.68	0.47	1.01	0.5
ENSG00000280070.1	AL049833.3	2.09773	1.06883	0.00530745	0.0148519	2.27511	-1.37097	-0.455197	0.0990895	0.180889	-1.00397	0.74	0.85	1.62	1.57	3.17	3.01	1.66	1.63	0.94	0.57	0.67	0.75
ENSG00000269940.1	AL049840.3	1.09998	0.137474	0.25632	0.352136	0.591217	1.1339	0.181298	0.104302	0.188347	0.981706	8.62	10.16	10.94	10.93	13.2	10.06	9.29	11	11.05	10.29	11.43	9.28
ENSG00000269958.1	AL049840.4	1.22515	0.292962	0.00595904	0.0163502	2.22482	1.11969	0.163105	0.0734413	0.143114	1.13406	8.97	8.49	8.89	10.82	10.89	10.51	9.89	11.69	8.79	8.88	9.84	9.96
ENSG00000270108.1	AL049840.5	1.23654	0.306311	0.0950279	0.158182	1.02215	1.10268	0.141013	0.361399	0.483357	0.442013	4.87	5.35	6.65	8.57	8.98	8.79	6.06	6.73	7.02	5.86	5.7	5.97
ENSG00000259010.1	AL049869.1	-1.24168	-0.312295	0.291681	0.390428	-0.535091	-1.12162	-0.165586	0.528007	0.6379	-0.27736	0.42	0.35	0.53	0.32	0.22	0.3	0.4	0.31	0.25	0.42	0.23	0.3
ENSG00000213598.4	AL049873.1	-1.34585	-0.428522	0.0148727	0.0347531	-1.82761	-1.01013	-0.0145346	0.915129	0.945489	-0.0385176	14.45	12.42	11.86	11.46	7.93	11.03	9.21	8.38	11.03	11.04	12.5	9.96
ENSG00000233558.1	AL050331.1	-1.04801	-0.0676555	0.748386	0.812466	-0.125875	1.09023	0.124638	0.541987	0.650661	0.266011	1.66	1.64	1.4	1.25	1.77	1.31	1.17	1.31	1.39	1.55	1.4	1.26
ENSG00000259943.1	AL050341.2	1.08944	0.123583	0.5121	0.609284	0.290645	1.09081	0.125397	0.455977	0.572144	0.341058	1.24	1.25	1.3	0.97	1.09	1.23	1.33	1.4	1.04	1.17	1.27	1.1
ENSG00000273004.1	AL078644.2	-1.45238	-0.538415	0.0738144	0.128633	-1.13186	-1.24733	-0.318846	0.192928	0.301683	-0.714604	0.71	1.36	1.24	1.08	0.74	0.64	0.99	0.48	0.68	0.58	0.76	0.88
ENSG00000230922.1	AL079301.1	-1.95892	-0.970058	0.0482811	0.0911179	-1.31622	-1.5948	-0.673377	0.0708448	0.138944	-1.14969	1.29	1.8	3.63	4.05	2.18	1.84	0.7	0.73	1.47	1.13	1.12	1.67
ENSG00000237214.3	AL080243.2	1.03745	0.0530408	0.735265	0.801721	0.133556	1.08201	0.11372	0.604305	0.703864	0.218744	2.52	2.48	2.8	2.52	2.77	2.55	3.02	2.07	1.67	3.43	2.7	2.53
ENSG00000225793.2	AL080250.1	-1.46297	-0.548903	0.0390651	0.0765742	-1.40821	-1.21302	-0.278607	0.169374	0.273773	-0.771152	1.48	1.68	1.71	2.51	1.51	1.16	0.6	1.17	1.08	1.8	1.58	1.18
ENSG00000227627.2	AL080276.2	1.01607	0.0230023	0.892874	0.922267	0.0492096	1.05724	0.080307	0.562545	0.668484	0.249842	0.73	1.13	0.92	1.03	0.98	0.91	0.76	1.23	0.88	0.81	0.94	0.77
ENSG00000271789.1	AL080317.2	1.22523	0.293052	0.105821	0.172617	0.975429	-1.14806	-0.199203	0.211963	0.324126	-0.673741	1.02	1.09	1.6	1.71	2	1.71	1.28	1.41	0.94	1.05	0.93	1.12
ENSG00000272356.1	AL080317.3	1.44582	0.531889	0.023548	0.050539	1.62805	-1.04084	-0.057746	0.697272	0.779556	-0.156598	0.4	0.48	0.52	0.72	1.01	0.75	0.52	0.71	0.42	0.48	0.46	0.39
ENSG00000214093.3	AL096701.1	-1.43496	-0.521009	0.019468	0.0432738	-1.71068	1.12824	0.174069	0.361202	0.483134	0.442249	1.8	1.75	1.91	2.19	1.74	1.22	1.17	1.01	1.79	2.3	1.5	1.84
ENSG00000271857.1	AL096865.1	-1.09573	-0.131889	0.236912	0.330619	-0.625413	-1.00236	-0.0034026	0.975429	0.984602	-0.0108045	2.82	2.61	3.09	3.33	2.74	2.52	2.76	2.43	2.61	2.46	2.85	2.45
ENSG00000260669.2	AL096870.2	1.23408	0.303436	0.194446	0.281977	0.711201	1.14389	0.193948	0.457101	0.573016	0.339988	0.73	0.73	0.49	0.99	0.87	0.71	0.93	0.89	0.63	1	0.54	0.78
ENSG00000276603.1	AL109614.1	-1.58535	-0.664801	0.00715949	0.0190814	-2.14512	-1.10932	-0.14967	0.479488	0.594048	-0.319222	4.89	8.03	6.62	7.83	3.39	4.24	4.19	4.59	6.75	4.4	6.43	4.63
ENSG00000237686.6	AL109615.3	-2.25601	-1.17378	1.02e-05	0.000114794	-4.9928	-1.56414	-0.645366	0.000233734	0.00159875	-3.63128	2.28	1.82	2.13	2.35	0.9	0.86	0.82	1.11	1.54	1.2	1.24	1.18
ENSG00000234241.1	AL109618.1	1.13307	0.180237	0.355026	0.457662	0.449739	-1.00349	-0.00502237	0.976773	0.985338	-0.0102063	0.89	1.23	1.61	1.56	1.82	1.57	1.39	1	1.02	1.45	1.01	1.11
ENSG00000271895.2	AL109811.2	1.0587	0.0822984	0.731871	0.799414	0.135566	1.30373	0.382641	0.0166357	0.0443692	1.77896	1.65	1.59	1.86	2.23	2.79	2.79	1.74	1.44	2.28	1.95	2.09	2.41
ENSG00000216775.3	AL109918.1	-1.41202	-0.497759	0.000701715	0.00289022	-3.15384	-1.108	-0.147953	0.152436	0.252853	-0.816912	1.67	1.53	1.51	1.54	1.15	1.1	0.91	1.14	1.28	1.18	1.28	1.43
ENSG00000277558.1	AL109923.1	-1.43989	-0.525958	0.039062	0.0765742	-1.40825	-1.4153	-0.501103	0.0425971	0.0930873	-1.37062	2.04	1.8	2.34	3.13	2.09	1.67	1.47	0.96	1.32	1.78	0.96	1.59
ENSG00000271335.5	AL117336.2	-1.03911	-0.0553525	0.809411	0.859246	-0.0918307	-1.1376	-0.186	0.368791	0.490658	-0.43322	0.52	1.1	1.21	1.08	0.98	0.69	0.98	0.65	0.79	0.74	0.66	0.72
ENSG00000272983.1	AL117339.4	1.85736	0.893256	0.000738969	0.00301605	3.13137	-1.71165	-0.775385	0.000816368	0.00416572	-3.08811	0.12	0.14	0.13	0.15	0.28	0.33	0.2	0.2	0.06	0.07	0.08	0.06
ENSG00000236673.5	AL117378.1	1.1456	0.196102	0.868014	0.903737	0.0614732	-1.0333	-0.0472554	0.963328	0.977084	-0.0162258	0.45	0.69	6.29	16.25	8.41	7.25	0.88	0.84	2.63	1.5	1.29	1.99
ENSG00000273759.1	AL117379.1	-1.1101	-0.150694	0.380629	0.482976	-0.419498	-1.05257	-0.0739209	0.620496	0.716927	-0.207261	4.38	4.7	6.11	7.27	5.76	5.83	3.97	3.95	4.95	4.04	4.25	5.25
ENSG00000278192.1	AL118505.1	-1.82663	-0.869182	0.000304712	0.00149539	-3.51611	-1.03659	-0.0518388	0.753211	0.823369	-0.123083	1.62	1.26	1.72	2.13	0.95	1.04	0.82	0.68	1.69	1.42	1.09	1.47
ENSG00000268858.2	AL118506.1	-1.23962	-0.309898	0.00139372	0.00503588	-2.85582	-1.01145	-0.0164296	0.803037	0.863281	-0.0952645	4.85	5.35	5.34	6	4.39	4.2	3.68	4.09	4.96	5.3	4.85	4.75
ENSG00000279164.1	AL118508.2	-2.79597	-1.48335	5.51e-05	0.000398772	-4.25888	-1.08871	-0.122624	0.596895	0.69762	-0.224102	0.45	0.49	0.44	0.47	0.14	0.14	0.12	0.2	0.36	0.26	0.53	0.35
ENSG00000260708.1	AL118516.1	-1.19756	-0.260096	0.233506	0.327005	-0.631701	-1.32398	-0.404883	0.0985016	0.180098	-1.00656	6.67	6.02	5.24	3.78	4.12	4.29	4.53	4.51	3.08	3.31	4.25	3.91
ENSG00000271780.1	AL118558.3	-1.05665	-0.0794914	0.712089	0.783835	-0.147466	-1.03604	-0.0510843	0.779586	0.845001	-0.108136	2.1	2.17	1.78	1.49	1.48	1.66	2.01	1.77	1.73	1.56	1.56	1.59
ENSG00000258790.1	AL121594.1	1.67093	0.740655	0.0194238	0.0431993	1.71167	1.54799	0.630392	0.0555859	0.114838	1.25504	3.76	2.85	2.89	1.59	4.5	3.1	4.2	5.26	3.78	4.02	5.3	2.63
ENSG00000258738.1	AL121603.2	-1.0425	-0.0600508	0.749381	0.813273	-0.125297	1.56651	0.647554	0.00489761	0.0170193	2.31002	0.54	0.54	0.64	0.49	0.48	0.42	0.54	0.58	0.88	0.61	0.71	0.88
ENSG00000273165.1	AL121652.1	-1.16909	-0.225386	0.318399	0.420181	-0.497028	1.24551	0.316734	0.211123	0.32315	0.675465	1.97	2.52	2.08	1.58	1.79	1.72	1.68	1.46	1.69	2.58	1.94	2.61
ENSG00000235159.1	AL121672.2	-1.58608	-0.665466	0.0947937	0.157885	-1.02322	-1.85509	-0.891492	0.0201426	0.0516339	-1.69589	1.18	1.09	0.6	0.9	0.88	0.66	0.54	0.28	0.41	0.32	0.34	0.5
ENSG00000279253.1	AL121753.2	-1.42333	-0.509273	0.00922771	0.0234841	-2.03491	1.36501	0.448909	0.00539435	0.0183624	2.26806	1.15	1.25	1.71	1.61	1.01	1.07	1.09	0.7	1.47	1.86	1.77	1.75
ENSG00000165521.15	AL121768.1	1.68458	0.752389	1.01e-06	2.25e-05	5.99365	1.15222	0.204419	0.0306602	0.0719892	1.51342	2.46	2.66	2.62	2.28	4.63	4.44	3.38	4.7	2.57	2.63	2.53	2.77
ENSG00000242163.1	AL121769.1	1.25083	0.322885	0.429573	0.530811	0.366963	1.19149	0.252763	0.414445	0.535188	0.382534	3.66	5.39	11.91	9.79	11.92	13.47	4.99	6.75	8.72	6.39	6.72	7.69
ENSG00000274414.1	AL121772.1	-1.93505	-0.952371	0.00550552	0.0153082	-2.2592	-1.10317	-0.141655	0.527597	0.637646	-0.277698	0.35	0.3	0.56	0.51	0.14	0.31	0.17	0.2	0.31	0.42	0.25	0.33
ENSG00000273619.1	AL121832.2	-1.15434	-0.207074	0.325832	0.427933	-0.487006	1.03383	0.0479955	0.824577	0.879389	0.083769	2.62	1.81	3.57	3.73	2.47	2.25	2.38	2.21	2	2.71	2.58	3
ENSG00000275437.1	AL121832.3	-1.44008	-0.526148	0.10143	0.166896	-0.993832	-1.23679	-0.306599	0.177675	0.28377	-0.750373	0.62	0.82	0.93	1.6	0.85	0.93	0.44	0.43	0.64	0.64	0.64	0.73
ENSG00000260711.2	AL121839.2	-1.45057	-0.536623	0.00686006	0.0184194	-2.16367	-1.28634	-0.363275	0.0342875	0.0785118	-1.46486	0.25	0.26	0.41	0.41	0.24	0.23	0.22	0.18	0.24	0.21	0.23	0.21
ENSG00000273047.1	AL121845.2	-1.96607	-0.975318	0.0445772	0.0853334	-1.35089	1.05453	0.0766054	0.84107	0.891995	0.0751677	2	3.26	3.25	1.12	1.66	0.75	0.69	1.25	2.28	2.73	1.46	1.99
ENSG00000273154.3	AL121845.3	-1.35832	-0.441824	0.0138044	0.0326955	-1.85998	1.29244	0.370102	0.0264972	0.064029	1.5768	3.17	2.03	2.63	3.42	1.82	1.91	1.84	2.04	3.19	3.47	2.89	3.67
ENSG00000225912.1	AL121871.1	-1.11548	-0.157661	0.569633	0.66271	-0.244405	1.20998	0.274985	0.26517	0.384496	0.576475	2.3	2.57	3.06	1.59	2.64	1.57	1.6	2.51	2.46	2.77	2.51	2.19
ENSG00000275223.1	AL121906.2	-1.49828	-0.583311	0.145567	0.222999	-0.836936	1.12524	0.170239	0.657052	0.74686	0.1824	0.55	1.09	0.49	1.25	0.55	0.56	0.32	0.51	0.57	0.81	0.66	0.64
ENSG00000273108.1	AL121929.2	1.41946	0.505346	0.00500523	0.0141362	2.30058	1.3073	0.386595	0.0212945	0.0538663	1.67173	3.08	3.54	5.18	5.07	6.46	5.6	5.05	5.02	5.55	4.92	4.3	4.65
ENSG00000258824.2	AL122035.1	1.4474	0.533464	0.180622	0.265473	0.74323	1.59709	0.675444	0.155561	0.256575	0.808099	1.33	1.45	0.64	1.74	2.44	1.16	1.81	1.58	1.29	1.86	0.98	2.17
ENSG00000272909.1	AL122035.2	2.1029	1.07238	0.000135377	0.000787881	3.86846	1.54836	0.630739	0.00751389	0.0237521	2.12414	0.49	0.44	0.44	0.43	0.88	1.09	0.78	1	0.75	0.65	0.57	0.5
ENSG00000244733.5	AL132656.2	-1.18646	-0.246665	0.187632	0.273813	-0.726692	1.25923	0.332542	0.0762857	0.147285	1.11756	1.06	1.29	1.67	2.2	1.3	1.41	1.14	1.01	1.89	1.55	1.73	1.5
ENSG00000272489.1	AL132656.3	-1.05472	-0.0768575	0.740952	0.806396	-0.13021	-1.02209	-0.0315277	0.880535	0.920781	-0.0552536	0.89	0.81	1.11	1.02	1.17	1.2	0.53	0.81	1.04	0.87	0.52	0.95
ENSG00000280355.1	AL132656.4	1.63111	0.705855	0.000971417	0.00375285	3.01259	1.30757	0.38689	0.0614504	0.124316	1.21148	0.44	0.41	0.64	0.65	0.92	0.97	0.7	0.74	0.68	0.48	0.52	0.73
ENSG00000258445.3	AL132777.1	1.46395	0.549871	0.016647	0.0381126	1.77866	1.14075	0.189981	0.494922	0.608455	0.305463	2.68	3.8	4.44	4.29	6.74	6.34	5.19	3.8	5.5	4.85	2.24	3.65
ENSG00000258457.5	AL132780.2	1.35128	0.434328	0.0557608	0.102287	1.25367	1.58375	0.663342	0.0106341	0.0311923	1.9733	1.06	1.03	2.12	1.11	1.65	1.74	1.45	1.75	1.76	1.75	1.89	1.22
ENSG00000259132.1	AL132780.3	-1.28866	-0.365875	0.00291141	0.00912038	-2.5359	-1.01438	-0.0205994	0.81449	0.872426	-0.0891142	12.69	13.07	13.24	11.85	9.13	9.95	8.23	10.03	12.86	11.62	11.04	10.72
ENSG00000280129.1	AL132780.5	-1.08524	-0.118011	0.512107	0.609284	-0.290639	-1.12961	-0.175823	0.331153	0.453447	-0.479971	0.67	1.07	1.15	1.17	1.02	0.76	0.84	0.89	0.92	0.74	0.71	0.75
ENSG00000240023.1	AL133163.1	1.05627	0.078974	0.501119	0.599411	0.300059	1.22643	0.294464	0.0301256	0.0710155	1.52106	2.28	2.3	3	2.55	2.71	2.69	2.33	2.75	2.39	2.92	2.8	2.86
ENSG00000273162.1	AL133215.2	-1.54979	-0.63207	0.00203354	0.00686366	-2.69175	-1.30042	-0.378978	0.0299557	0.0707111	-1.52352	2.33	2.01	2.93	3.01	1.7	1.94	1.26	1.55	1.99	1.86	1.35	1.76
ENSG00000276805.2	AL133216.2	-1.1615	-0.215987	0.569692	0.662715	-0.24436	1.0479	0.0675008	0.800107	0.860768	0.0968517	0.05	0.08	0.06	0.13	0.09	0.03	0.08	0.07	0.07	0.05	0.07	0.07
ENSG00000276334.1	AL133243.2	-1.13721	-0.185495	0.160199	0.240918	-0.79534	-1.06244	-0.0873757	0.478918	0.593479	-0.319739	2.21	2.7	3.2	3.52	2.6	2.42	2.08	2.56	2.36	2.58	2.14	2.61
ENSG00000276517.1	AL133243.3	-1.13911	-0.187912	0.0973315	0.161432	-1.01175	1.05048	0.0710462	0.490224	0.604166	0.309605	1.39	1.41	1.8	1.71	1.24	1.48	1.22	1.34	1.6	1.47	1.3	1.62
ENSG00000279544.1	AL133243.4	-1.20468	-0.26865	0.0461387	0.0877209	-1.33593	1.14886	0.200202	0.180712	0.286872	0.743012	0.87	1.14	1.11	0.97	0.93	0.83	0.75	0.75	0.92	1.07	0.93	1.29
ENSG00000219747.1	AL133260.1	1.13511	0.182832	0.347591	0.450156	0.458931	1.0778	0.108094	0.615028	0.712719	0.211105	6.46	7.94	5.33	5.68	7.89	8.73	5.9	6.26	6.18	7.16	4.51	7.33
ENSG00000219682.4	AL133268.1	-1.11029	-0.150938	0.297036	0.396383	-0.527191	-1.10354	-0.142135	0.345692	0.468263	-0.46131	1.16	1.04	1.27	1.18	1.02	0.87	1.03	1.07	1.09	0.98	0.86	0.79
ENSG00000251194.2	AL133330.1	1.48287	0.568392	0.170687	0.253633	0.7678	1.7007	0.76613	0.0704688	0.13841	1.152	0.36	0.92	1.24	1.47	1.09	2.09	1.08	1	1.33	1	1.08	1.52
ENSG00000260000.2	AL133338.1	-1.07787	-0.108181	0.657927	0.7402	-0.181822	-1.00851	-0.0122195	0.953812	0.97064	-0.0205374	0.8	0.78	0.75	0.59	0.56	0.52	0.82	0.69	0.68	0.49	0.63	0.75
ENSG00000255339.6	AL133352.1	-1.46684	-0.55271	0.357629	0.460457	-0.446567	-1.09067	-0.125221	0.807731	0.866853	-0.0927333	2.76	1.52	0.83	0.62	0.42	0.81	2.61	1	1.68	0.21	1.36	2.05
ENSG00000285932.1	AL133353.2	-1.25151	-0.323665	0.300984	0.400891	-0.521457	-1.07143	-0.0995423	0.748895	0.81996	-0.125579	0.53	0.7	0.47	0.42	0.46	0.25	0.43	0.53	0.24	0.6	0.42	0.55
ENSG00000260461.1	AL133355.1	-4.33877	-2.11729	0.0048884	0.0138686	-2.31083	-3.66673	-1.87449	0.0610531	0.123574	-1.21429	0.18	0.1	0.26	0.47	0.04	0.14	0	0.01	0	0.13	0.24	0
ENSG00000260285.1	AL133367.1	-1.07723	-0.107324	0.438798	0.539657	-0.357735	-1.33568	-0.417579	0.0500727	0.105781	-1.3004	0.52	0.6	0.46	0.61	0.52	0.52	0.45	0.46	0.27	0.46	0.39	0.32
ENSG00000245261.1	AL133375.1	1.07774	0.108008	0.643732	0.728756	0.191295	-1.27306	-0.348303	0.238429	0.355454	-0.622641	0.67	0.5	0.7	0.74	0.68	1.03	0.61	0.48	0.73	0.41	0.32	0.3
ENSG00000232450.1	AL133517.1	-1.45264	-0.538677	0.0921441	0.154186	-1.03553	-1.46336	-0.54929	0.0814867	0.155228	-1.08891	0.67	0.57	1.25	1.2	0.9	0.43	0.52	0.49	0.49	0.63	0.36	0.42
ENSG00000273893.1	AL133520.1	1.30736	0.386655	0.262567	0.358964	0.580761	1.60749	0.684813	0.0452326	0.0976665	1.34455	1.41	1.7	1.31	0.71	2.03	1.11	1.47	1.81	1.5	1.48	2.03	1.94
ENSG00000272892.1	AL133551.1	-1.07459	-0.103782	0.715417	0.786109	-0.145441	1.01754	0.0250883	0.919506	0.948264	0.0364456	0.8	0.64	0.71	0.48	0.43	0.55	0.68	0.68	0.61	0.68	0.49	0.51
ENSG00000266680.1	AL135905.1	-1.43158	-0.517611	0.0040572	0.0119061	-2.39177	-1.01133	-0.0162573	0.885959	0.924519	-0.0525865	1.51	1.5	1.74	1.74	1.04	0.94	1.2	1.18	1.27	1.57	1.31	1.53
ENSG00000285976.1	AL135905.2	-1.08838	-0.122187	0.68407	0.761515	-0.164899	-1.28463	-0.361355	0.142217	0.240212	-0.847049	14.15	14.88	27.28	27.67	25.06	24.36	13.03	13.42	18.53	13.76	12.63	16.19
ENSG00000272447.1	AL135925.1	-1.57611	-0.65637	0.00788722	0.0206337	-2.10308	1.50543	0.590173	0.000628062	0.00341399	3.202	1.22	1.45	1.38	1.29	0.95	0.55	1.02	0.78	2.04	1.79	1.63	1.71
ENSG00000258727.1	AL135999.1	-1.20802	-0.272647	0.246502	0.341228	-0.60818	-1.04527	-0.0638739	0.719377	0.796364	-0.143044	0.2	0.19	0.26	0.29	0.15	0.16	0.23	0.2	0.2	0.16	0.22	0.18
ENSG00000261242.1	AL136038.3	1.26068	0.3342	0.152962	0.231892	0.815417	1.18812	0.248683	0.179905	0.285847	0.744956	0.59	0.55	0.58	0.54	0.63	0.6	0.88	0.69	0.58	0.6	0.53	0.58
ENSG00000270878.1	AL136038.4	-1.15728	-0.210739	0.368568	0.471068	-0.433482	-1.10389	-0.1426	0.553061	0.660288	-0.257227	0.55	0.49	0.6	0.81	0.78	0.53	0.36	0.41	0.54	0.43	0.59	0.32
ENSG00000273783.1	AL136040.1	1.19596	0.258172	0.313694	0.414987	0.503493	1.45992	0.545888	0.0370729	0.0835734	1.43094	1.08	1.04	0.72	0.76	0.86	0.96	1.13	1.15	1.02	0.98	1.27	1.31
ENSG00000269967.1	AL136115.2	1.33634	0.418291	0.14149	0.218451	0.849273	1.68782	0.755164	0.00270291	0.0106649	2.56817	1.28	0.92	1.67	1.66	2.51	2.1	1.09	1.7	2	1.76	1.97	2.1
ENSG00000217648.1	AL136116.3	1.15122	0.203159	0.224458	0.316678	0.648865	-1.20782	-0.272408	0.119447	0.210226	-0.922826	1.18	1.09	1.11	1.17	1.67	1.33	1.17	1	0.7	0.86	0.75	1.02
ENSG00000241255.1	AL136126.1	-1.04491	-0.0633822	0.745397	0.810125	-0.127612	1.01321	0.0189265	0.938294	0.961009	0.0276612	3.52	4.51	5.66	4.33	4.32	4.56	4.85	3.04	2.94	5.98	4.46	3.28
ENSG00000279289.1	AL136164.3	1.54497	0.627581	0.00395782	0.0116937	2.40254	1.50556	0.590298	0.000345026	0.00215029	3.46215	2.11	2.03	2.92	2.82	4.49	4.17	2.85	2.95	3.75	3.26	3.07	3.46
ENSG00000276434.1	AL136221.1	-1.358	-0.441486	0.349381	0.451957	-0.456701	1.12407	0.168726	0.640963	0.733735	0.193167	0.59	0.98	1.7	1.58	1.01	1.3	0.91	0.17	0.86	1.01	0.71	1.39
ENSG00000254692.1	AL136295.1	1.36297	0.446751	0.121772	0.19356	0.914453	1.43782	0.523883	0.0539011	0.112252	1.2684	7.2	9.57	5.05	3.89	6.73	7.28	8.8	9.23	8.33	8.4	8.31	8.25
ENSG00000259529.2	AL136295.5	1.30284	0.381664	0.141265	0.218184	0.849965	1.21959	0.286395	0.258128	0.377192	0.588164	1.22	1.14	1.86	2.76	2.2	2	2.35	1.52	1.62	2.18	2.09	1.47
ENSG00000278784.1	AL136295.7	1.02212	0.0315604	0.879017	0.91226	0.0560026	1.10642	0.145893	0.519186	0.630387	0.284677	0.93	0.84	0.99	1.53	0.98	1.23	1.15	0.75	1.01	0.91	0.75	1.4
ENSG00000276255.2	AL136379.1	1.22436	0.292028	0.2266	0.319006	0.64474	-1.42418	-0.510133	0.0353278	0.0803187	-1.45188	0.29	0.21	0.31	0.28	0.31	0.48	0.31	0.24	0.19	0.12	0.16	0.16
ENSG00000231767.4	AL136454.1	-1.14993	-0.201542	0.0922205	0.154266	-1.03517	-1.04163	-0.0588425	0.593068	0.694417	-0.226895	22.06	27.06	21.87	20.66	20.75	18.68	18.91	17.69	20.69	21.08	19.15	19.56
ENSG00000275318.1	AL136981.2	1.16515	0.220519	0.0908349	0.15231	1.04175	1.07626	0.106025	0.42324	0.543277	0.373413	2.99	2.76	3.46	3.8	4.35	3.74	3.51	3.19	2.57	3.37	3.2	3.21
ENSG00000151303.11	AL136982.1	1.2205	0.287476	0.376328	0.478605	0.424434	-1.01214	-0.0174072	0.955852	0.972065	-0.0196093	0.13	0.06	0.19	0.13	0.21	0.16	0.1	0.13	0.08	0.09	0.1	0.13
ENSG00000237280.1	AL136982.3	-1.04768	-0.0671973	0.828997	0.874416	-0.0814472	1.01372	0.0196636	0.949853	0.968506	0.0223437	1.07	1.21	0.7	1.58	1.07	1.08	0.68	1.31	0.71	0.97	1.22	0.84
ENSG00000272033.1	AL136984.1	1.17374	0.231111	0.256933	0.352782	0.590179	1.21992	0.286789	0.101028	0.183616	0.995559	1.09	1	1.49	1.23	2.13	1.2	1.14	1.21	1.68	1.18	1.09	1.26
ENSG00000283828.1	AL137002.2	-1.00134	-0.00193885	0.992668	0.994449	-0.003196	1.09414	0.129798	0.623843	0.719896	0.204925	0.17	0.17	0.26	0.3	0.26	0.21	0.21	0.16	0.2	0.23	0.25	0.13
ENSG00000229931.1	AL137003.1	1.11301	0.154469	0.644481	0.729195	0.19079	-1.01986	-0.0283662	0.921184	0.949505	-0.0356538	1.55	1.06	1.1	0.77	1.07	1.35	1.85	0.79	0.92	0.83	0.79	0.82
ENSG00000272341.1	AL137003.2	-1.10933	-0.149684	0.348083	0.450508	-0.458317	-1.0389	-0.055058	0.733015	0.80727	-0.134887	0.97	0.78	1.29	1.44	1.01	0.91	0.96	0.89	1.02	0.82	0.91	0.93
ENSG00000273784.4	AL137058.2	1.15811	0.211777	0.214403	0.305366	0.668769	1.32957	0.410956	0.0180611	0.0473497	1.74326	4.09	3.51	2.96	3.71	4.23	3.33	3.97	4.31	4.03	4.4	4.55	3.74
ENSG00000235018.1	AL137077.1	1.00065	0.000937409	0.998129	0.998622	0.000813428	-1.09175	-0.126636	0.623681	0.719773	-0.205038	1.11	1.47	2.03	2.81	2.94	2.55	0.71	1.6	1.62	1.51	1.12	1.23
ENSG00000283078.1	AL137077.2	-1.15137	-0.203352	0.265362	0.361838	-0.576162	-1.29315	-0.370884	0.0541043	0.112474	-1.26677	0.86	0.84	1.02	0.81	0.63	0.89	0.63	0.8	0.56	0.63	0.7	0.48
ENSG00000272084.1	AL137127.1	-1.1377	-0.186126	0.362205	0.464916	-0.441046	-1.08024	-0.111357	0.631378	0.725791	-0.199711	0.32	0.28	0.22	0.39	0.25	0.29	0.23	0.23	0.3	0.23	0.25	0.19
ENSG00000254537.1	AL137161.1	-1.35671	-0.440117	0.359537	0.462006	-0.444256	-1.04185	-0.059153	0.887318	0.925481	-0.0519208	4.26	3.09	2.22	1.28	2.56	2.34	0.84	2.01	2.85	1.84	1.61	1.67
ENSG00000261553.5	AL137782.1	1.2331	0.302286	0.017182	0.0391065	1.76493	-1.27473	-0.350194	0.00697311	0.0224149	-2.15657	1.61	2.21	2.51	2.11	2.44	3.07	2.69	2.77	1.47	2.02	1.32	1.52
ENSG00000285853.1	AL137802.3	-4.20068	-2.07062	0.0549102	0.101006	-1.26035	-1.34044	-0.42271	0.388089	0.509885	-0.411068	0.31	0.44	0.19	0.45	0	0	0.36	0.2	0.23	0.04	0.22	0.23
ENSG00000279633.1	AL137918.1	3.49463	1.80514	2.89e-05	0.000244731	4.53884	2.47107	1.30514	0.000542239	0.00302908	3.26581	0.12	0.14	0.22	0.25	0.71	0.73	0.43	0.53	0.32	0.44	0.25	0.39
ENSG00000274204.1	AL138689.1	-1.75732	-0.813374	0.0961274	0.159762	-1.01715	-1.08454	-0.117079	0.726047	0.801871	-0.139035	0.56	0.77	1.33	1.83	0.68	1.19	0.25	0.4	0.74	0.56	0.74	1.04
ENSG00000272269.1	AL138724.1	1.15358	0.206116	0.286889	0.385415	0.542286	1.63399	0.708403	0.00197128	0.00830691	2.70525	1.3	1.56	1.07	1.72	1.53	1.5	1.78	1.39	2.02	2.02	2.17	1.8
ENSG00000218976.2	AL138725.1	-1.83951	-0.879319	0.0285077	0.0591073	-1.54504	1.32465	0.405612	0.165153	0.268429	0.782113	0.31	0.42	0.76	0.99	0.24	0.45	0.22	0.24	0.66	0.63	0.61	0.6
ENSG00000232454.2	AL138752.1	1.25498	0.327667	0.199595	0.288	0.69985	1.52354	0.607429	0.0653444	0.130347	1.18479	4.27	4.9	2.88	5.53	6.61	5.55	5.28	4.13	3.65	6.45	7.17	6.16
ENSG00000259953.1	AL138756.1	2.07917	1.05601	2.83e-05	0.000240457	4.54834	1.38652	0.47147	0.0117421	0.0338219	1.93025	0.56	0.28	0.37	0.42	0.54	0.62	0.42	0.49	0.42	0.49	0.28	0.48
ENSG00000244332.1	AL138759.1	-1.26281	-0.336642	0.319831	0.421761	-0.49508	-1.21241	-0.277882	0.331203	0.453476	-0.479905	1.44	1.03	1.28	1.67	1.11	0.46	1.16	1.48	0.6	1.1	0.64	1.45
ENSG00000233589.1	AL138789.1	1.41871	0.504577	0.253536	0.349083	0.595961	1.07846	0.108979	0.747592	0.818869	0.126335	0.9	0.99	2.24	2.67	3.32	3.41	1.16	1.48	1.6	1.41	0.92	1.9
ENSG00000277151.1	AL138820.1	1.16637	0.222025	0.208535	0.299034	0.68082	1.0268	0.0381504	0.815064	0.872749	0.0888082	0.3	0.33	0.45	0.52	0.53	0.54	0.38	0.35	0.39	0.31	0.31	0.43
ENSG00000285278.1	AL138885.3	1.47495	0.560667	0.0502018	0.0940435	1.29928	1.4174	0.503245	0.0228402	0.0569118	1.6413	0.31	0.28	0.25	0.23	0.28	0.47	0.34	0.49	0.29	0.34	0.32	0.39
ENSG00000276809.1	AL138955.1	-1.27759	-0.353423	0.357973	0.460617	-0.446149	-1.38255	-0.467335	0.15909	0.260993	-0.798358	0.47	0.5	1.27	1.01	0.84	0.85	0.43	0.29	0.42	0.48	0.33	0.55
ENSG00000240624.1	AL138976.1	2.1177	1.0825	0.0146366	0.0342772	1.83456	3.20412	1.67993	0.00361283	0.0133928	2.44215	0.62	0.38	0.99	1.72	1.94	1.72	1.46	1.17	1.97	1.71	1.67	1.8
ENSG00000259775.1	AL138976.2	-1.0438	-0.061843	0.841045	0.883313	-0.0751807	-1.2799	-0.356026	0.324345	0.446824	-0.488992	1.53	1.41	1.03	0.78	1.58	1.01	0.86	0.97	0.71	0.96	0.45	1.04
ENSG00000220472.1	AL139095.2	1.07721	0.107295	0.649476	0.733361	0.187437	1.01207	0.017306	0.937442	0.960542	0.0280554	3.22	5.22	3.76	2.75	3.71	3.16	4.17	4.42	3.57	3.57	3.32	2.76
ENSG00000230570.1	AL139095.3	-1.38468	-0.469558	0.275825	0.373683	-0.559366	-1.29915	-0.37757	0.43505	0.553134	-0.361461	0.58	0.18	0.4	0.73	0.35	0.24	0.24	0.27	0.22	0.13	0.27	0.31
ENSG00000217130.1	AL139100.1	1.05187	0.0729616	0.647153	0.731452	0.188993	-1.05911	-0.0828533	0.619643	0.716199	-0.207858	5.12	7.71	7.47	6.44	6.49	6.86	7.99	5.95	4.51	6.81	5.56	5.8
ENSG00000254708.1	AL139174.1	1.45394	0.539967	0.23807	0.331806	0.623296	1.25226	0.324535	0.464133	0.579876	0.333358	0.34	0.45	1.26	1.23	1.45	1.55	0.59	0.7	1.1	0.58	0.44	0.9
ENSG00000230615.6	AL139220.2	2.41449	1.27172	0.000326651	0.00157686	3.48592	-1.37686	-0.461386	0.117923	0.208057	-0.928401	0.81	0.98	0.55	0.5	1.55	1.63	1.18	2.51	0.36	0.39	0.62	0.5
ENSG00000215168.2	AL139276.1	1.01438	0.0205983	0.936641	0.955526	0.0284267	-1.02074	-0.0296154	0.897962	0.933269	-0.046742	0.82	1.11	1.4	2.05	1.58	1.55	0.84	1.17	1.15	1.3	0.9	1
ENSG00000234694.1	AL139289.2	-1.55117	-0.633356	0.0485565	0.0915558	-1.31375	-1.4156	-0.501414	0.0394663	0.0877443	-1.40377	2.32	3.85	2.27	2.89	1.57	1.2	2.41	1.78	1.69	1.77	1.87	1.55
ENSG00000256500.5	AL139300.1	1.18795	0.248468	0.219456	0.310731	0.658652	-1.24122	-0.31176	0.110716	0.197675	-0.955789	4.45	5.3	3.56	3.42	4.8	5.33	3.49	5.3	2.99	2.64	3.72	2.9
ENSG00000259049.1	AL139317.3	1.05092	0.0716558	0.729852	0.797831	0.136765	1.22877	0.297219	0.0474481	0.101256	1.32378	1.64	1.95	2.03	2.17	3.26	1.71	1.83	1.38	2.22	2.28	1.8	1.93
ENSG00000277159.1	AL139384.2	-3.00869	-1.58914	0.0038823	0.0115083	-2.41091	-1.28549	-0.362323	0.267498	0.386959	-0.572679	0.23	0.16	0.11	0.15	0.04	0.11	0.03	0.02	0.11	0.07	0.09	0.12
ENSG00000275880.1	AL139385.1	-3.10907	-1.63649	5.69e-05	0.000407046	-4.24514	-1.22399	-0.291589	0.0717238	0.140427	-1.14434	0.36	0.3	0.39	0.44	0.12	0.17	0.12	0.06	0.23	0.27	0.28	0.26
ENSG00000277687.1	AL139407.1	-1.11311	-0.1546	0.528079	0.624279	-0.277301	1.51826	0.60242	0.00533641	0.0181961	2.27275	1.81	1.29	1.72	2.45	2.3	1.92	1.13	1.13	2.51	1.96	2.29	2.68
ENSG00000230221.2	AL157384.1	-1.33116	-0.412688	0.0830284	0.141701	-1.08077	1.15332	0.205798	0.345287	0.467998	0.46182	0.23	0.4	0.4	0.29	0.3	0.21	0.2	0.23	0.25	0.38	0.33	0.32
ENSG00000239665.8	AL157392.3	1.1751	0.232786	0.223002	0.314981	0.651692	-1.2035	-0.267242	0.0764685	0.147573	-1.11652	5.69	6.56	8.46	10.14	12.74	10.41	7	8.03	5.91	5.86	5.46	6.51
ENSG00000237842.2	AL157713.1	1.0159	0.0227568	0.951527	0.966268	0.0215788	-1.06262	-0.0876296	0.816562	0.873885	-0.0880108	0.4	0.26	0.18	0.44	0.36	0.2	0.4	0.26	0.23	0.2	0.19	0.25
ENSG00000285820.1	AL157829.1	1.36261	0.446376	0.0472574	0.0895449	1.32553	1.18537	0.245332	0.272096	0.392282	0.565278	0.21	0.2	0.3	0.33	0.38	0.32	0.39	0.26	0.29	0.32	0.22	0.21
ENSG00000258904.1	AL157871.5	-1.0302	-0.0429242	0.894285	0.923193	-0.0485241	-1.01846	-0.0263963	0.890024	0.92743	-0.0505983	1.17	1.22	1.5	1.56	2.56	0.87	0.84	1.34	1.27	1.25	0.95	0.91
ENSG00000273381.1	AL158071.5	1.15051	0.202269	0.18334	0.268688	0.736742	-1.10047	-0.138121	0.5246	0.634889	-0.280172	0.17	0.18	0.22	0.2	0.22	0.25	0.2	0.19	0.21	0.15	0.1	0.15
ENSG00000269929.2	AL158152.1	1.16031	0.214506	0.00750037	0.0198105	2.12492	1.04927	0.0693843	0.266932	0.386361	0.573599	5.59	5.84	6.52	5.88	6.64	7.2	6.15	6.58	5.92	5.69	5.76	6.38
ENSG00000228328.2	AL158201.1	1.05142	0.0723406	0.676386	0.75558	0.169805	1.24824	0.31989	0.0231414	0.0575547	1.63561	2.74	2.64	2.83	3.57	3.47	4.03	2.22	2.51	2.7	3.59	3.21	3.66
ENSG00000260912.1	AL158206.1	1.35208	0.43518	0.016868	0.0385234	1.77294	1.28439	0.361083	0.0978345	0.179115	1.00951	0.49	0.72	0.73	0.61	0.78	0.9	0.8	0.83	0.57	0.6	0.81	0.91
ENSG00000260917.1	AL158212.3	1.05552	0.0779488	0.713072	0.784491	0.146867	1.20575	0.269926	0.111775	0.199298	0.951655	0.87	0.99	1.39	1.71	1.56	1.46	0.96	0.95	1.37	1.27	1.17	1.39
ENSG00000279392.1	AL158801.5	-1.40016	-0.485596	0.00282267	0.00890355	-2.54934	-1.32777	-0.409001	0.0252255	0.0617206	-1.59816	6.69	7.64	6.82	7.04	5.16	5.27	5.13	4.14	3.81	5.83	4.09	5.46
ENSG00000226088.1	AL158839.1	4.10742	2.03823	2.49e-08	2.3e-06	7.60456	3.08898	1.62713	5.42e-08	4.51e-06	7.26607	22.32	23.9	18.57	17.34	72.62	78.89	80.61	91.05	58.09	58.91	59.75	59.86
ENSG00000258634.3	AL160006.1	-1.04435	-0.0625995	0.434295	0.535339	-0.362215	1.04393	0.0620223	0.453218	0.569468	0.343692	2.4	2.6	2.7	2.36	2.54	2.23	2.13	2.15	2.55	2.28	2.26	2.62
ENSG00000275216.2	AL161431.1	-2.05971	-1.04244	0.185768	0.271606	-0.73103	-2.30625	-1.20555	0.107676	0.193479	-0.967882	6.28	6.68	26.98	55.24	12.98	11.94	4.72	5.31	9.01	5.77	5.53	7.56
ENSG00000233178.7	AL161457.2	-1.25943	-0.332773	0.18244	0.267593	-0.73888	1.28469	0.361421	0.224198	0.339266	0.649369	0.37	0.5	0.67	0.61	0.46	0.41	0.48	0.26	0.88	0.44	0.58	0.4
ENSG00000214770.3	AL161756.1	1.15882	0.212651	0.153568	0.232658	0.813699	-1.00385	-0.00554689	0.971743	0.98237	-0.0124486	1.15	1.01	1.23	1.1	1.43	1.48	1.02	1.27	1	0.78	1.06	1.19
ENSG00000278291.1	AL161772.1	-1.06054	-0.084794	0.587946	0.679572	-0.230662	-1.04119	-0.0582296	0.715452	0.793282	-0.145419	0.6	0.53	0.52	0.68	0.46	0.5	0.54	0.6	0.39	0.5	0.46	0.62
ENSG00000276672.1	AL161891.1	1.1824	0.24172	0.0135457	0.0322005	1.8682	1.04831	0.0680652	0.338461	0.460985	0.470491	1.49	1.55	1.72	1.57	1.92	1.91	1.57	1.66	1.51	1.48	1.44	1.54
ENSG00000070778.13	AL162171.1	1.81335	0.858654	3.81e-06	5.73e-05	5.41871	1.35182	0.4349	0.000778642	0.00401504	3.10866	4.18	4.3	5.67	5.65	9.32	8.45	8.09	8.13	6.9	5.71	5.58	6.47
ENSG00000278576.1	AL162171.4	1.36311	0.4469	0.0749791	0.130256	1.12506	-1.14519	-0.195581	0.308803	0.431096	-0.510319	0.99	0.87	1.48	1.72	2.01	1.97	1.41	1.09	0.97	0.96	0.78	1.07
ENSG00000272030.1	AL162258.2	-1.17943	-0.238091	0.283999	0.382515	-0.546683	-1.08762	-0.121176	0.688649	0.772021	-0.162002	1.12	0.8	1.16	1.14	0.95	0.63	0.91	0.67	0.38	0.94	1.16	0.9
ENSG00000277959.1	AL162274.2	1.05238	0.0736509	0.797949	0.850868	0.0980251	1.5059	0.59063	0.0452446	0.0976665	1.34443	2.96	2.3	4.73	2.12	3.7	3.61	2.8	2.04	3.92	3.26	3.59	4.43
ENSG00000257307.1	AL162311.2	1.11371	0.155372	0.529067	0.62513	0.276489	1.15193	0.204058	0.439185	0.556885	0.357353	0.77	1.67	1.23	1.52	1.54	1.73	1.12	1.1	1.32	1.61	0.97	1.16
ENSG00000231856.2	AL162377.1	-1.02989	-0.0424946	0.910963	0.936292	-0.0404993	1.02351	0.033525	0.93737	0.960542	0.0280888	0.48	0.38	0.17	0.36	0.32	0.28	0.26	0.34	0.26	0.25	0.23	0.32
ENSG00000274421.1	AL162390.1	1.34356	0.426061	0.0499262	0.0936834	1.30167	-1.12184	-0.165864	0.480456	0.594769	-0.318347	1.13	1.18	1.72	2.17	2.69	1.85	1.76	1.59	1.69	1.23	0.86	1.04
ENSG00000243155.1	AL162431.2	-1.35214	-0.435249	0.0741373	0.129043	-1.12996	-1.87103	-0.903832	0.00314858	0.0119772	-2.50189	0.76	0.73	0.9	1.64	0.81	0.69	0.68	0.53	0.46	0.5	0.43	0.36
ENSG00000285796.1	AL162458.1	-1.34416	-0.426702	0.000452668	0.00204325	-3.34422	-1.31818	-0.398543	0.000304273	0.00194841	-3.51674	0.66	0.67	0.67	0.7	0.46	0.5	0.46	0.49	0.45	0.46	0.47	0.46
ENSG00000225032.5	AL162586.1	-1.11344	-0.15502	0.565067	0.658865	-0.2479	-1.01664	-0.0238071	0.909392	0.941309	-0.0412491	0.57	1.17	1.14	2.07	1.65	1.5	0.72	0.81	1.05	0.7	0.97	0.94
ENSG00000177788.5	AL162595.1	1.16286	0.217681	0.390327	0.492925	0.408571	-1.40491	-0.49048	0.135815	0.23186	-0.867052	5.38	4.08	4.57	3.22	4	6.19	5.6	4.11	3.72	1.7	3.17	2.38
ENSG00000237788.1	AL162615.1	-1.46789	-0.553743	0.0366599	0.0726957	-1.43581	-1.17556	-0.233345	0.194105	0.303108	-0.711963	0.89	0.91	1.51	1.55	1.13	0.86	0.73	0.5	0.92	0.8	0.92	0.86
ENSG00000260806.1	AL163051.1	1.33665	0.418618	0.0944401	0.157394	1.02484	1.03652	0.0517419	0.826107	0.880565	0.0829634	0.64	0.4	0.76	0.49	0.72	0.61	0.7	0.84	0.44	0.58	0.56	0.44
ENSG00000276182.1	AL163051.2	1.48602	0.571454	0.00407031	0.0119302	2.39037	1.1977	0.260263	0.0387961	0.0865672	1.41121	4.45	4.73	5.9	5.24	8.69	8.01	5.32	7.65	5.73	5.2	4.77	6.03
ENSG00000270605.1	AL353622.1	-1.26917	-0.343885	0.0978397	0.162125	-1.00948	-1.66898	-0.738964	0.002548	0.0101733	-2.5938	0.5	0.66	0.52	0.68	0.46	0.5	0.5	0.32	0.3	0.37	0.25	0.3
ENSG00000213073.4	AL353625.1	1.41353	0.499298	0.00180614	0.00623389	2.74325	1.37504	0.459471	0.0206227	0.0525407	1.68565	0.95	0.75	0.69	0.97	1.05	1.21	1.06	1.38	0.98	1.11	1.13	1.01
ENSG00000272906.1	AL353708.3	1.20913	0.273965	0.387002	0.489374	0.412287	-1.04158	-0.0587772	0.864884	0.90965	-0.0630421	0.33	0.3	0.66	0.65	0.48	0.79	0.51	0.34	0.17	0.34	0.51	0.36
ENSG00000243695.1	AL353729.1	1.16518	0.220549	0.575311	0.668204	0.240097	1.32259	0.403364	0.255883	0.374732	0.591959	0.56	0.5	0.89	1.45	1.82	1.08	0.51	0.6	0.91	0.88	0.52	1.32
ENSG00000165121.11	AL353743.1	1.1604	0.214626	0.131379	0.20584	0.881475	-1.71388	-0.777267	0.000529912	0.00296721	-3.2758	0.66	0.75	0.99	0.89	1.03	1.01	0.75	0.89	0.33	0.4	0.46	0.42
ENSG00000232110.7	AL353751.1	-3.05183	-1.60967	1.35e-06	2.74e-05	-5.87022	-1.18879	-0.249492	0.0426916	0.0932428	-1.36966	11.33	9.11	8.54	9.16	2.36	2.66	3.14	3.49	9.97	9.14	6.9	6.31
ENSG00000280077.1	AL353763.2	1.18647	0.246677	0.159325	0.239965	0.797716	1.21137	0.276636	0.155301	0.25625	0.808825	1.19	1.33	2.03	2	2.21	1.83	1.44	1.85	1.8	1.81	1.26	2.05
ENSG00000279608.1	AL353795.3	1.17686	0.23494	0.125365	0.198085	0.901825	1.31499	0.395047	0.0174571	0.0460834	1.75803	0.4	0.49	0.7	0.72	0.69	0.66	0.57	0.59	0.66	0.67	0.63	0.64
ENSG00000259994.1	AL353796.1	1.00785	0.0112803	0.93578	0.954889	0.028826	-1.16712	-0.222952	0.20684	0.318087	-0.684365	0.52	0.48	0.5	0.53	0.52	0.44	0.49	0.53	0.48	0.34	0.42	0.32
ENSG00000261334.1	AL353803.4	1.26771	0.342227	0.145183	0.222474	0.838083	1.03717	0.052657	0.839139	0.89042	0.0761659	0.24	0.3	0.2	0.29	0.38	0.31	0.26	0.31	0.28	0.19	0.22	0.18
ENSG00000228906.1	AL353804.1	1.43572	0.52177	0.032685	0.0661583	1.48565	-1.18659	-0.24682	0.312814	0.435343	-0.504713	1.33	1.89	2.82	2.69	3.32	3.39	2.76	2.48	1.25	1.74	1.44	1.49
ENSG00000280378.1	AL353898.3	1.23753	0.30746	0.13251	0.207367	0.877752	1.15441	0.207161	0.310083	0.432489	0.508522	0.36	0.29	0.32	0.38	0.42	0.4	0.32	0.45	0.26	0.33	0.36	0.33
ENSG00000215895.4	AL354702.1	-1.20978	-0.274742	0.369926	0.472616	-0.431885	-1.22663	-0.294704	0.345404	0.46803	-0.461673	0.51	0.97	1.25	1.73	1.1	0.9	0.63	0.69	0.51	0.86	0.69	0.86
ENSG00000225489.6	AL354707.1	-1.18154	-0.240664	0.1988	0.287108	-0.701583	1.24807	0.3197	0.101175	0.183863	0.994926	0.9	1.29	1.31	0.92	0.86	0.92	0.9	0.8	1.02	1.57	1.01	1.01
ENSG00000213080.3	AL354714.2	1.37295	0.457283	0.00279419	0.00882919	2.55374	1.34492	0.427525	0.00618475	0.0204057	2.20868	4.86	6.29	6.11	5.19	7.38	7.57	7.85	6.4	6.16	7.95	6.07	7.25
ENSG00000275160.1	AL354718.1	2.3646	1.24159	9.8e-05	0.000617829	4.00864	1.59738	0.675705	0.00535148	0.018232	2.27153	2	1.3	1.38	1.62	3.98	3.37	3.17	4.15	2.17	2.29	2.39	2.01
ENSG00000286162.1	AL354744.1	1.24245	0.31319	0.126762	0.200059	0.89701	1.79941	0.847523	0.00162708	0.0071504	2.78859	2	1.49	1.7	1.41	2.4	1.76	2.01	1.81	2.5	3.34	2.2	2.59
ENSG00000236028.1	AL354766.2	-1.65381	-0.72579	0.0438218	0.084156	-1.35831	-1.36	-0.443607	0.1385	0.235389	-0.858551	5.5	8.23	4.58	3.73	2.72	2.65	4.32	3.01	4.08	3.3	3.64	3
ENSG00000226332.2	AL354836.1	-1.93411	-0.951669	0.0126535	0.0304507	-1.89779	-1.36816	-0.452235	0.108744	0.195024	-0.963596	2.28	2.68	5.36	5.36	2.53	2.37	1.53	1.21	2.34	2.69	2.31	2.02
ENSG00000266896.1	AL354892.3	1.23699	0.306839	0.15447	0.233806	0.811155	1.2884	0.365578	0.0916185	0.170388	1.03802	0.3	0.35	0.43	0.35	0.35	0.44	0.49	0.41	0.5	0.4	0.33	0.35
ENSG00000254473.1	AL354920.1	1.52064	0.604679	0.185129	0.270893	0.732525	1.68967	0.756741	0.119963	0.210954	0.920952	1.03	0.69	0.28	0.63	0.58	0.91	1.06	0.95	0.8	0.86	0.76	0.85
ENSG00000239392.2	AL354989.2	-1.98989	-0.992687	0.0539929	0.0995962	-1.26766	-1.00884	-0.0126959	0.968649	0.980236	-0.0138337	0.47	0.2	0.44	0.41	0.33	0.29	0.07	0.14	0.23	0.24	0.34	0.37
ENSG00000241494.1	AL355032.1	1.11251	0.153815	0.344673	0.44702	0.462593	1.14519	0.195587	0.239917	0.356881	0.619939	11.05	13.43	12.1	9.09	12.92	10.46	12.89	12.66	10.85	13.42	10.09	13
ENSG00000259001.3	AL355075.4	-1.00183	-0.00263783	0.982501	0.98873	-0.00766681	1.13471	0.182326	0.11059	0.197531	0.956282	492.73	488.51	374.3	363.01	428.5	374.45	483.99	428.13	447.92	491.47	500.86	463.13
ENSG00000258412.1	AL355102.1	1.08387	0.116187	0.738798	0.804647	0.131474	1.35278	0.435923	0.0898017	0.167764	1.04672	1.78	1.45	1.99	1.41	1.82	0.88	2.14	2.5	1.41	2.07	1.76	2.5
ENSG00000285991.1	AL355312.6	1.29649	0.374616	0.137118	0.212917	0.862905	-1.04529	-0.0638988	0.791094	0.854059	-0.101772	0.48	0.33	0.27	0.39	0.47	0.6	0.48	0.33	0.21	0.35	0.35	0.34
ENSG00000225092.2	AL355336.1	1.25064	0.322671	0.174001	0.257542	0.759448	1.1692	0.225525	0.243511	0.360743	0.613482	0.57	0.5	0.79	0.84	1.13	0.99	0.67	0.55	0.7	0.8	0.51	0.7
ENSG00000274605.1	AL355338.1	-1.56295	-0.64427	4.7e-05	0.000354224	-4.32784	-1.0458	-0.0646049	0.44207	0.559208	-0.354509	12.15	11.24	11.05	10.6	6.66	6.59	7.09	6.78	9.3	9.96	10.03	9.94
ENSG00000273002.1	AL355388.2	-1.21203	-0.277429	0.195797	0.283404	-0.708194	-1.10236	-0.140593	0.549951	0.657409	-0.259676	0.65	0.44	0.43	0.52	0.44	0.4	0.41	0.36	0.36	0.55	0.32	0.39
ENSG00000273373.1	AL355488.1	1.04335	0.0612179	0.634149	0.720426	0.197808	-1.05092	-0.0716486	0.500113	0.613	-0.300932	2.72	3.11	3.81	3.25	3.66	3.67	2.59	2.9	3.12	2.61	2.53	2.95
ENSG00000238058.2	AL355574.1	-1.00183	-0.00263188	0.984375	0.989939	-0.00683939	1.13462	0.18221	0.145124	0.243733	0.83826	8.37	7.19	9.66	10.69	8.38	8.93	7.39	10.32	9.51	10.16	7.96	9.22
ENSG00000259828.1	AL355596.1	1.56166	0.643079	0.000123086	0.000732411	3.90979	2.36335	1.24083	2.66e-06	6.19e-05	5.57592	0.37	0.38	0.45	0.45	0.61	0.63	0.6	0.63	1.04	0.8	0.79	0.87
ENSG00000219470.1	AL355802.1	-1.08412	-0.116519	0.508235	0.605818	-0.293936	1.04451	0.0628329	0.569155	0.673967	0.244769	3.07	3.88	4.19	4.15	3.94	4.47	2.44	3.18	3.81	3.28	3.53	3.44
ENSG00000232774.7	AL355916.1	3.14695	1.65395	5.97e-06	7.86e-05	5.22416	2.31519	1.21113	6.89e-05	0.000643812	4.16189	0.43	0.5	0.44	0.4	1.18	1.38	1.3	1.42	0.95	0.76	0.89	0.87
ENSG00000273066.5	AL355987.4	1.1359	0.183837	0.206775	0.29693	0.684502	1.20263	0.266191	0.0914249	0.170127	1.03894	0.45	0.49	0.62	0.96	0.65	0.72	0.62	0.69	0.6	0.68	0.67	0.77
ENSG00000258768.2	AL356019.2	1.22189	0.28911	0.0825827	0.141089	1.08311	1.07121	0.0992404	0.607841	0.706712	0.21621	0.47	0.5	0.68	0.72	0.89	0.72	0.53	0.69	0.73	0.44	0.44	0.66
ENSG00000231187.2	AL356056.2	-1.28578	-0.362639	0.0269735	0.0564833	-1.56906	1.05809	0.0814619	0.603305	0.702955	0.219463	3.72	4.26	3.97	3.62	2.87	3.14	3.11	2.62	3.66	4.36	2.96	3.72
ENSG00000283265.1	AL356234.3	7.68408	2.94187	2.44e-07	9.34e-06	6.61259	4.82808	2.27145	3.48e-06	7.53e-05	5.45844	0.36	0.49	0.3	0.32	2.77	3.25	2.47	2.46	1.59	1.68	1.3	1.35
ENSG00000248503.2	AL356235.1	1.28763	0.364717	0.166793	0.24883	0.777822	1.12467	0.169499	0.529375	0.639262	0.276236	0.21	0.36	0.4	0.67	0.65	1.49	0.7	0.47	0.76	0.23	0.78	0.27
ENSG00000279838.1	AL356273.3	1.65051	0.722911	0.000116483	0.000704776	3.93374	-1.04237	-0.0598677	0.707134	0.786568	-0.150498	1.58	1.28	1.49	1.46	2.27	2.5	2.01	2.44	1.54	1.33	1.13	0.99
ENSG00000272945.1	AL356299.2	-1.46529	-0.551188	0.165708	0.247485	-0.780655	1.46096	0.546917	0.132027	0.227054	0.879337	0.94	1.32	0.73	1.21	0.59	0.68	1.16	0.34	1.8	1.49	1.08	0.79
ENSG00000273382.1	AL356488.3	1.14656	0.197315	0.213585	0.304603	0.670429	1.07528	0.104708	0.534428	0.643829	0.272111	0.33	0.4	0.42	0.52	0.54	0.39	0.42	0.46	0.41	0.45	0.29	0.41
ENSG00000213087.3	AL356535.1	2.0966	1.06805	0.0375282	0.0741089	1.42564	2.12805	1.08953	0.0472504	0.100917	1.32559	2.31	2.11	1.88	0.55	4.12	2.81	4.35	2.07	2.6	4.19	2.21	2.23
ENSG00000233514.1	AL356653.1	1.07002	0.0976434	0.696685	0.771547	0.156964	1.09184	0.126759	0.67021	0.757509	0.173789	3.45	5.41	3.81	2.64	4.3	4.25	3.2	4.08	3.95	4.3	4.2	2.4
ENSG00000259318.1	AL356801.1	1.96154	0.97199	0.000237744	0.00122707	3.62389	1.73613	0.795878	0.00275704	0.0108278	2.55956	7.09	6.75	9.96	5.71	13.95	15.23	12.77	15.18	10.58	12.69	9.22	13.75
ENSG00000224356.5	AL356966.1	-1.31764	-0.397958	0.124364	0.196907	-0.905306	-1.06414	-0.0896827	0.637946	0.731565	-0.195216	0.52	0.71	0.7	0.69	0.5	0.44	0.35	0.44	0.61	0.52	0.49	0.47
ENSG00000277496.1	AL357033.4	-1.71799	-0.780726	0.0496648	0.0932856	-1.30395	1.09238	0.127471	0.625503	0.720785	0.20377	0.46	0.21	0.38	0.37	0.13	0.13	0.28	0.2	0.32	0.27	0.33	0.34
ENSG00000219712.1	AL357054.1	-1.09378	-0.129326	0.610926	0.700779	-0.214012	-1.10614	-0.14554	0.583338	0.686239	-0.23408	0.8	0.79	1.38	1.61	1.44	0.96	0.86	0.68	1.3	0.76	0.78	0.68
ENSG00000237499.6	AL357060.1	2.03137	1.02246	0.00886965	0.0227033	2.05209	3.0151	1.5922	0.000156572	0.001185	3.80529	0.81	1.67	0.65	1.13	1.53	2.39	1.67	2.15	2.94	2.58	2.73	2.17
ENSG00000285130.2	AL358113.1	1.01136	0.0162932	0.972894	0.982114	0.0119344	-1.75023	-0.807542	0.0171935	0.0455304	-1.76464	0.35	0.35	0.36	0.22	0.38	0.19	0.53	0.31	0.13	0.25	0.1	0.23
ENSG00000216813.1	AL358178.1	-1.21673	-0.283013	0.370138	0.472851	-0.431636	-1.15125	-0.203206	0.409625	0.530238	-0.387614	3.09	4.11	7	4.29	4.97	5.37	2.66	2.21	3.79	4.08	2.64	3.11
ENSG00000258711.2	AL358334.2	1.12347	0.167959	0.222167	0.31402	0.653321	1.20404	0.267885	0.0780601	0.149986	1.10757	0.48	0.59	0.58	0.53	0.68	0.5	0.62	0.56	0.55	0.72	0.57	0.5
ENSG00000282386.1	AL358472.4	1.02669	0.0379984	0.851867	0.891396	0.0696282	-1.27145	-0.346477	0.138701	0.235543	-0.857919	1.33	2.07	1.5	1.87	1.42	1.61	1.86	1.72	1.16	1.19	1.41	0.85
ENSG00000285779.1	AL358472.7	-1.5955	-0.674013	0.217433	0.308595	-0.662675	-5.30043	-2.40611	0.0265427	0.0641291	-1.57606	0.12	0.51	0.27	0.51	0.12	0.32	0.08	0.22	0	0	0.22	0.11
ENSG00000225580.2	AL358942.1	1.32602	0.407102	0.163102	0.244291	0.78754	1.66987	0.739735	0.00238516	0.00965413	2.62248	0.43	0.43	0.42	0.38	0.36	0.51	0.59	0.66	0.56	0.6	0.59	0.6
ENSG00000273186.1	AL359091.5	1.19435	0.25623	0.141381	0.218321	0.84961	1.1103	0.150954	0.362118	0.483954	0.441149	4.14	5.32	4.73	4.34	6.41	5.36	4.37	5.65	4.33	3.99	4.43	5.54
ENSG00000279406.1	AL359183.1	-1.63918	-0.712971	0.0158096	0.0365568	-1.80108	1.14497	0.195306	0.35139	0.474173	0.454211	0.26	0.26	0.27	0.27	0.19	0.09	0.19	0.14	0.21	0.21	0.31	0.29
ENSG00000247287.2	AL359220.1	1.47355	0.559301	0.000406647	0.00187739	3.39078	1.91525	0.937533	3.19e-07	1.56e-05	6.49684	4.38	3.52	4.23	4.23	6.88	6.09	4.94	5.84	7.39	7.17	7.07	7.59
ENSG00000280186.1	AL359258.3	1.33716	0.419173	0.165598	0.247343	0.780945	1.24235	0.313077	0.271103	0.391076	0.566866	0.37	0.24	0.19	0.23	0.35	0.28	0.28	0.4	0.29	0.24	0.24	0.29
ENSG00000213540.3	AL359504.1	1.16775	0.223731	0.418005	0.520169	0.378818	1.0157	0.0224802	0.943279	0.963888	0.0253598	1.06	1.29	2.44	1.85	2.79	1.66	1.67	1.34	1.53	0.88	0.99	2.14
ENSG00000271576.1	AL359504.2	1.07413	0.103163	0.775969	0.834299	0.110156	-1.1102	-0.150823	0.585262	0.687795	-0.232649	0.49	0.3	0.4	0.4	0.3	0.28	0.43	0.71	0.21	0.44	0.31	0.24
ENSG00000234156.2	AL359636.2	1.34999	0.432946	0.0501585	0.0940167	1.29966	1.58138	0.661185	0.0100833	0.0298669	1.9964	0.73	0.52	0.76	0.91	0.78	0.78	1.21	0.87	0.93	1.11	1.41	1.06
ENSG00000229965.1	AL359704.1	1.34667	0.4294	0.181742	0.266757	0.740544	1.04774	0.0672837	0.841884	0.892562	0.074748	0.99	1.74	1.18	0.67	1.4	1.77	1.15	1.47	0.93	1.37	0.94	0.8
ENSG00000272129.1	AL359715.3	1.26996	0.344778	0.104315	0.170688	0.981655	1.11814	0.161102	0.42837	0.547207	0.368181	0.43	0.36	0.45	0.42	0.53	0.7	0.43	0.44	0.37	0.33	0.49	0.38
ENSG00000285851.1	AL359762.3	1.23516	0.304702	0.405394	0.507981	0.392123	-1.15444	-0.20719	0.572138	0.676348	-0.242499	0.15	0.32	0.55	0.64	0.6	0.47	0.38	0.3	0.28	0.26	0.28	0.22
ENSG00000282849.1	AL359834.1	-1.61	-0.687063	0.00454889	0.0130578	-2.34209	1.13882	0.187539	0.153036	0.253585	0.815207	2.74	3.17	3.28	3.5	2.1	1.47	2.48	1.57	2.87	3.67	3.09	3.2
ENSG00000205740.2	AL359878.1	-1.6742	-0.743469	0.0172964	0.0392936	-1.76205	-1.24908	-0.320862	0.279643	0.400244	-0.553396	0.27	0.24	0.22	0.17	0.12	0.1	0.12	0.14	0.19	0.13	0.1	0.2
ENSG00000228818.1	AL359918.1	-1.0029	-0.00417966	0.974097	0.983049	-0.0113979	1.03381	0.047965	0.716625	0.794198	0.144708	0.86	1.06	1.33	1.39	1.07	1.24	1.01	1.01	1	1.01	0.94	1.2
ENSG00000279670.1	AL359922.3	1.21189	0.277255	0.267603	0.364385	0.572509	1.04501	0.0635122	0.743703	0.815727	0.128601	2.52	2.94	4.79	5.23	5.47	5.31	3.14	3.55	3.68	3.54	2.93	3.68
ENSG00000270103.3	AL360012.1	1.01857	0.0265515	0.92465	0.946155	0.0340226	-1.1039	-0.142609	0.648634	0.740502	-0.188	824.62	1035.46	1235.44	1381.65	926.29	1188.81	1291.8	1127.62	826.56	1140.1	894.72	1196.3
ENSG00000261654.1	AL360270.2	1.96407	0.973847	0.00283005	0.0089203	2.54821	1.29869	0.377056	0.0630395	0.126736	1.20039	0.22	0.25	0.36	0.33	0.8	0.67	0.41	0.39	0.4	0.34	0.24	0.34
ENSG00000273010.1	AL360270.3	1.14884	0.200174	0.330783	0.432854	0.480457	1.20449	0.268424	0.460857	0.576684	0.336434	0.32	0.57	0.46	0.56	0.65	0.52	0.44	0.49	0.71	0.54	0.59	0.23
ENSG00000273038.2	AL365203.2	-1.42956	-0.515569	0.029497	0.0608297	-1.53022	-1.51768	-0.601869	0.00520068	0.0178207	-2.28394	1	0.98	1.17	0.92	0.61	0.95	0.49	0.81	0.68	0.52	0.69	0.48
ENSG00000124593.16	AL365205.1	-1.81714	-0.861666	1.48e-06	2.89e-05	-5.82913	-1.09773	-0.134527	0.10188	0.184745	-0.99191	1.89	1.99	2.17	2.32	1.05	1.05	1.09	1.06	1.59	1.69	1.85	1.64
ENSG00000214558.4	AL365217.1	1.30219	0.380942	0.0271438	0.0567663	1.56633	1.06213	0.0869604	0.706057	0.785715	0.15116	0.4	0.62	0.66	0.62	0.72	0.78	0.75	0.62	0.57	0.57	0.33	0.7
ENSG00000223861.1	AL365436.1	1.87818	0.909336	0.023917	0.0511681	1.62129	1.18347	0.243017	0.566529	0.671633	0.246777	0.96	0.86	1.87	3.59	2.86	2.77	2.45	2.66	0.98	1.75	1.89	1.36
ENSG00000231434.1	AL365440.1	1.32944	0.410819	0.230244	0.323125	0.637811	-1.01224	-0.0175499	0.952436	0.970027	-0.0211642	2.95	3.63	7.35	8.59	8.35	8.12	5.42	4.48	4.81	4.89	4.04	4.76
ENSG00000224950.2	AL390066.1	1.17536	0.233107	0.409044	0.511455	0.38823	-1.07565	-0.105214	0.74322	0.815426	-0.128882	0.11	0.13	0.25	0.27	0.23	0.16	0.19	0.19	0.14	0.12	0.07	0.16
ENSG00000243960.1	AL390195.1	1.10114	0.139002	0.389621	0.492109	0.409358	1.12201	0.166079	0.335223	0.457569	0.474667	11.15	16.72	13.66	9.16	11.97	11.55	14.73	16.37	13.95	16.17	13.36	10.75
ENSG00000226465.2	AL390198.1	1.07099	0.0989393	0.813626	0.86253	0.089575	1.44808	0.534142	0.26712	0.386482	0.573294	6.11	2.49	2.25	2.17	2.1	2.5	3.83	3.39	4.26	5.87	3.4	1.92
ENSG00000279819.1	AL390318.1	1.05653	0.0793272	0.724961	0.793703	0.139686	-1.04075	-0.0576266	0.802511	0.86289	-0.0955489	1.18	0.79	1.28	1.46	1.54	1.32	1.12	0.82	0.99	0.98	0.66	1.15
ENSG00000217801.10	AL390719.1	1.38524	0.470138	0.00418265	0.0121779	2.37855	1.55942	0.641006	0.000517297	0.00291803	3.28626	2.37	3.07	2.75	3.74	4.37	3.97	4.03	4.28	4.08	4.04	4.4	4.25
ENSG00000272141.1	AL390719.2	-1.2255	-0.293375	0.0869207	0.147026	-1.06088	-1.0317	-0.0450192	0.818184	0.874928	-0.0871492	2	1.49	1.9	2.01	1.53	1.39	1.27	1.6	1.89	2.01	1.24	1.34
ENSG00000214144.3	AL390728.1	1.1184	0.161431	0.220996	0.312638	0.655616	-1.21108	-0.2763	0.0787287	0.151053	-1.10387	1.52	2	1.67	2.24	2.32	1.88	1.91	1.75	1.32	1.66	1.23	1.21
ENSG00000227671.4	AL390728.4	1.22116	0.288254	0.00737885	0.0195417	2.13201	1.35945	0.443026	0.000283321	0.00184574	3.54772	13.09	12.82	14.67	15.27	15.97	15.46	16.08	14.27	18.42	18.09	16.85	18.5
ENSG00000259865.1	AL390728.6	1.01789	0.0255756	0.90192	0.929061	0.0448322	1.85049	0.887906	0.00118901	0.00556797	2.92482	0.5	0.65	0.83	0.56	0.65	0.65	0.71	0.46	1.2	0.93	0.84	1.14
ENSG00000234062.8	AL390879.1	-1.27936	-0.355421	0.191254	0.278095	-0.718391	-1.12931	-0.175442	0.404636	0.525751	-0.392935	0.94	0.8	1.49	1.18	1.25	0.75	0.7	0.64	0.95	0.94	0.59	1.03
ENSG00000232499.2	AL391058.1	-1.9583	-0.969599	0.00829343	0.0214806	-2.08127	-1.22861	-0.297027	0.257638	0.376682	-0.58899	1.83	2.17	3.52	4.96	1.37	2.11	1.15	1.16	2.26	2.23	1.71	2.12
ENSG00000224635.1	AL391095.1	-1.3303	-0.411755	0.0554162	0.101763	-1.25636	-1.21639	-0.282611	0.146872	0.245997	-0.833061	0.86	0.82	0.96	1.44	0.94	0.8	0.52	0.7	0.86	0.58	0.78	0.66
ENSG00000275401.1	AL391095.3	-1.19295	-0.254533	0.162413	0.243484	-0.78938	-1.07837	-0.108852	0.466157	0.581587	-0.331468	2.62	3.33	4.15	4.3	3.18	3.84	2.46	2.3	3.1	2.65	3.14	2.71
ENSG00000272455.1	AL391244.2	-1.1237	-0.168251	0.135574	0.211019	-0.867824	-1.14058	-0.18977	0.191948	0.300561	-0.716816	1.54	1.75	1.72	1.72	1.46	1.56	1.34	1.44	1.55	1.08	1.37	1.22
ENSG00000250995.1	AL391280.1	1.13642	0.1845	0.43809	0.538949	0.358437	-1.34661	-0.429328	0.145534	0.244227	-0.837035	1.07	0.73	0.7	0.92	1.2	0.79	0.75	1.03	0.63	0.34	0.73	0.48
ENSG00000284618.1	AL391294.1	1.39174	0.476893	0.122641	0.194675	0.911364	1.80959	0.855666	0.0256593	0.0625429	1.59075	0.11	0.15	0.07	0.11	0.17	0.15	0.15	0.09	0.12	0.16	0.24	0.14
ENSG00000270504.1	AL391422.4	-1.86834	-0.901759	0.000217364	0.00114958	-3.66281	1.20375	0.267538	0.10857	0.194822	0.96429	0.7	0.67	0.61	0.75	0.33	0.4	0.31	0.36	0.58	0.74	0.79	0.79
ENSG00000224934.4	AL391684.1	-1.98488	-0.989051	5.95e-06	7.85e-05	-5.22545	-1.48926	-0.574593	0.000320734	0.00203136	-3.49385	1.04	1.1	1.38	1.42	0.68	0.57	0.57	0.54	0.73	0.78	0.62	0.78
ENSG00000229808.1	AL391825.1	1.20248	0.266018	0.293887	0.392926	0.531819	-1.68123	-0.749518	0.0472321	0.100917	-1.32576	0.64	0.7	1.19	1.24	1.17	1.31	0.68	0.83	0.87	0.4	0.22	0.53
ENSG00000277879.1	AL391988.1	1.26545	0.339654	0.0258245	0.0545001	1.58797	1.28948	0.366788	0.017676	0.0465385	1.75262	1.13	1.46	1.72	1.69	1.91	2.1	1.53	1.79	1.94	1.77	1.6	1.5
ENSG00000285988.1	AL392086.3	3.08025	1.62305	0.260411	0.356499	0.58434	-1.07321	-0.101938	0.946725	0.966117	-0.0237763	1.56	2.14	0	0	0.38	0.25	1.42	1.82	0	0.59	0.01	0.31
ENSG00000228106.5	AL392172.1	1.46659	0.552464	0.00383326	0.01139	2.41643	1.00791	0.0113733	0.93614	0.959786	0.0286592	8.36	10.81	8.59	8.32	10.78	11.07	18.71	13.48	7.85	6.82	9.08	6.81
ENSG00000223478.1	AL441992.1	-1.42189	-0.50781	0.0925653	0.154731	-1.03355	1.08499	0.117687	0.579535	0.683424	0.236921	4.15	4.07	3.48	2.86	1.57	2.6	3.07	2.75	3.7	2.8	3.27	4.41
ENSG00000286112.1	AL441992.2	1.49769	0.582741	0.0480607	0.0907994	1.31821	1.46161	0.547562	0.0468911	0.100346	1.32891	0.46	0.31	0.49	0.22	0.49	0.49	0.61	0.44	0.49	0.48	0.44	0.42
ENSG00000276248.1	AL442125.1	-1.55447	-0.636422	0.0140018	0.0330809	-1.85382	1.03773	0.0534373	0.783453	0.848043	0.105987	0.68	0.77	1.35	1.35	0.73	0.69	0.51	0.52	0.88	1.04	0.81	0.9
ENSG00000277767.1	AL442128.2	-1.81181	-0.857435	0.00772977	0.0203269	-2.11183	-1.2359	-0.305561	0.265333	0.384527	-0.576208	0.5	0.44	0.41	0.4	0.18	0.26	0.31	0.17	0.39	0.2	0.25	0.42
ENSG00000213036.3	AL445305.1	-1.07807	-0.108455	0.721068	0.790976	-0.142024	-1.1133	-0.154846	0.529796	0.63953	-0.275891	1.46	1.77	3.06	3.19	2.75	3.02	1.5	1.27	2.06	1.4	1.83	1.69
ENSG00000279423.1	AL445363.3	2.21609	1.14802	0.306277	0.40647	0.513886	3.04903	1.60835	0.132634	0.227926	0.877345	0.35	1.7	0	1.2	1.03	0.28	1.16	1.26	0.88	0.6	0.87	2.06
ENSG00000286231.1	AL445423.2	1.00526	0.00757396	0.974392	0.983097	0.0112663	-1.33771	-0.419768	0.11113	0.198302	-0.95417	2	1.52	2.42	1.41	1.64	1.91	2.27	1.24	1.34	1.51	1.23	0.81
ENSG00000227034.1	AL445433.1	1.13308	0.180251	0.643595	0.728702	0.191388	-1.04036	-0.0570851	0.874093	0.916382	-0.0584425	9.39	12.41	13.68	4.31	13.71	13.24	10.86	5.81	6.96	8.77	6.34	10.11
ENSG00000233461.5	AL445524.1	1.3965	0.481813	0.0313097	0.063886	1.50432	-1.07824	-0.108683	0.612233	0.710292	-0.213083	8.34	9.19	6.29	5.54	10.34	8.9	9.61	10.53	7.31	5.73	5.66	5.57
ENSG00000283982.1	AL445623.2	-1.1362	-0.184214	0.3724	0.474804	-0.42899	-1.01465	-0.0209854	0.922393	0.950165	-0.0350838	0.09	0.12	0.16	0.15	0.13	0.13	0.08	0.09	0.09	0.11	0.09	0.15
ENSG00000285839.1	AL445685.3	1.0737	0.102587	0.120558	0.191984	0.918805	1.0352	0.0499122	0.406398	0.527312	0.391048	18.85	19.39	17.65	17.77	18.31	19.17	19.32	20.39	17.56	17.92	18.28	19.33
ENSG00000230555.2	AL450326.1	-1.60368	-0.681388	0.0296668	0.0611114	-1.52773	-1.17841	-0.236846	0.358907	0.480828	-0.445017	1.22	1.25	0.87	1.66	0.83	0.94	0.47	0.71	1.01	0.9	0.66	0.92
ENSG00000230202.1	AL450405.1	-1.12698	-0.172461	0.506367	0.604144	-0.295535	1.06367	0.0890465	0.636565	0.730427	0.196157	3.83	4.39	3.17	3.53	2.72	2.28	4.16	3.64	3.63	3.97	2.74	3.83
ENSG00000229021.2	AL450992.1	-1.05791	-0.0812118	0.710309	0.782461	-0.148553	-1.13571	-0.183597	0.282999	0.403754	-0.548216	0.33	0.26	0.41	0.3	0.33	0.32	0.35	0.19	0.24	0.27	0.23	0.25
ENSG00000179743.4	AL450998.2	1.11891	0.162093	0.454901	0.555536	0.342083	1.02765	0.0393441	0.844198	0.894242	0.0735555	0.61	0.39	0.53	0.4	0.46	0.57	0.55	0.46	0.43	0.42	0.43	0.42
ENSG00000224621.1	AL451042.1	-1.5259	-0.60966	0.0788156	0.135727	-1.10339	-1.0319	-0.0453085	0.884158	0.923337	-0.0534703	2.04	1.78	1.05	2.53	1.16	0.92	1.16	1.07	1.54	1.74	1.35	1.18
ENSG00000227959.1	AL451042.2	-1.24844	-0.320127	0.120282	0.191681	-0.919801	1.02619	0.0372962	0.831223	0.885073	0.0802825	1.23	1.33	1.1	1.89	1.21	0.97	1.12	0.91	1.19	1.29	1.1	1.28
ENSG00000279659.1	AL451064.2	1.31126	0.390955	0.17417	0.257603	0.759027	-1.01267	-0.0181574	0.919143	0.948013	-0.0366168	0.54	0.83	1.06	1.02	1.76	1.19	0.69	0.93	0.66	0.69	0.73	0.8
ENSG00000271380.1	AL451085.2	-1.12955	-0.175753	0.541757	0.637377	-0.266196	-1.1556	-0.208642	0.510653	0.622721	-0.291874	1.01	1.34	0.91	0.65	1.07	0.88	0.67	0.67	0.77	0.49	0.62	0.94
ENSG00000285103.2	AL451123.1	-1.67109	-0.740792	0.0169442	0.0386508	-1.77098	1.53779	0.620856	0.00404704	0.0146293	2.39286	0.46	0.48	0.52	0.55	0.3	0.21	0.45	0.23	0.78	0.6	0.62	0.57
ENSG00000272288.5	AL451165.2	-1.25586	-0.32868	0.132896	0.207857	-0.876488	-1.21462	-0.280507	0.263735	0.382971	-0.578832	4.02	3.46	3.04	4.55	2.5	3.38	3.03	2.48	3.22	3.64	2.35	1.8
ENSG00000261068.2	AL512274.1	1.71703	0.779919	0.0587121	0.106726	1.23127	-1.43722	-0.523286	0.164401	0.267431	-0.784095	0.75	0.82	1.75	2.62	3.1	2.9	1.59	1.43	0.96	0.9	0.58	0.78
ENSG00000257884.2	AL512310.7	-1.28791	-0.365028	0.115789	0.185741	-0.936333	1.04337	0.0612445	0.824394	0.879389	0.0838651	0.17	0.26	0.38	0.36	0.24	0.22	0.18	0.19	0.18	0.39	0.22	0.25
ENSG00000257622.1	AL512356.1	-4.27635	-2.09638	0.149711	0.227988	-0.824746	-6.22357	-2.63774	0.0370811	0.0835802	-1.43085	5.96	7.05	17.5	17.36	10.58	11.09	0	7.98	9.74	0	4.15	1.71
ENSG00000260063.1	AL512408.1	1.44916	0.535215	0.00395364	0.0116898	2.403	-1.10945	-0.149849	0.371428	0.49351	-0.430125	0.4	0.42	0.5	0.59	0.7	0.78	0.56	0.63	0.38	0.42	0.36	0.3
ENSG00000170161.6	AL512625.1	1.1843	0.24403	0.058532	0.106494	1.23261	1.15907	0.212973	0.0761251	0.147135	1.11847	1.1	1.18	1.54	1.34	1.62	1.31	1.35	1.6	1.26	1.47	1.24	1.46
ENSG00000215284.2	AL512633.1	-1.43923	-0.525298	0.206307	0.296417	-0.685486	-1.1011	-0.13894	0.543752	0.652144	-0.264599	1.49	1.7	2.55	2.66	2.22	2.63	0.57	1.11	2.3	1.62	1.36	1.29
ENSG00000275198.1	AL512791.2	1.25859	0.331808	0.180855	0.265743	0.74267	-1.20561	-0.269762	0.344619	0.467324	-0.462661	0.22	0.18	0.13	0.16	0.19	0.27	0.2	0.19	0.13	0.08	0.15	0.14
ENSG00000232952.1	AL512844.1	-1.06143	-0.0860057	0.679536	0.757791	-0.167788	-1.02716	-0.0386634	0.856383	0.903454	-0.0673319	0.74	1.05	0.8	0.69	0.7	0.93	0.62	0.77	0.59	0.92	0.64	0.68
ENSG00000256966.6	AL513165.2	1.55654	0.638347	0.112543	0.1816	0.948683	1.5247	0.608528	0.102254	0.185192	0.990321	0.75	0.37	0.27	1.07	1.05	0.74	1.05	0.83	0.92	0.88	0.92	0.8
ENSG00000276997.4	AL513314.2	-1.35203	-0.435131	0.142115	0.219141	-0.847361	-1.16974	-0.226184	0.45684	0.572801	-0.340236	2.83	2.47	6.18	4.79	2.94	3.26	3.64	2.18	2.71	2.41	2.68	5.11
ENSG00000225313.5	AL513327.1	1.11502	0.157068	0.661724	0.743403	0.179323	-1.56406	-0.645296	0.0527835	0.110379	-1.2775	5.55	5.54	10.75	13.95	15.34	12.28	6.82	6.26	4.69	4.68	4.2	4.02
ENSG00000269896.2	AL513477.1	-1.5181	-0.602267	0.0157962	0.0365418	-1.80145	-1.11504	-0.157097	0.334781	0.457044	-0.475239	0.66	0.45	0.89	1.06	0.72	1.15	1	1.78	0.41	1.29	0.41	0.39
ENSG00000279443.1	AL513497.1	1.60661	0.684019	0.01809	0.0407478	1.74256	1.00126	0.00181692	0.996072	0.997507	0.00170924	0.2	0.32	0.26	0.3	0.3	0.51	0.42	0.44	0.12	0.29	0.4	0.15
ENSG00000223599.1	AL513523.1	-1.00381	-0.00548584	0.985118	0.990243	-0.00651162	-1.35957	-0.443155	0.0986905	0.180372	-1.00572	1.45	1.16	2.41	2.82	2.78	2.15	1.23	1.38	1.23	0.99	1.11	1.43
ENSG00000285571.1	AL513548.4	1.29178	0.369366	0.152235	0.231007	0.817485	-2.22747	-1.1554	0.00553947	0.0187605	-2.25653	0.43	0.49	0.76	0.57	0.58	0.94	0.52	0.79	0.36	0.18	0.08	0.17
ENSG00000228506.2	AL513550.1	-1.06523	-0.0911652	0.480382	0.579615	-0.318414	-1.10713	-0.146826	0.158055	0.259589	-0.801192	1.22	1.38	1.67	1.45	1.1	1.47	1.23	1.3	1.19	1.17	1.08	1.14
ENSG00000258593.2	AL583810.1	-1.20438	-0.268294	0.592831	0.684094	-0.227069	-1.54191	-0.624722	0.275367	0.395836	-0.560087	0.31	0.46	1.2	2.13	0.77	0.56	0.48	0.67	0.58	0.25	0.3	0.55
ENSG00000232389.1	AL583856.1	1.4268	0.512785	0.0200971	0.0444415	1.69687	1.42138	0.507293	0.00802306	0.0249669	2.09566	1.45	1.91	1.46	1.42	1.95	2.02	2.08	2.64	2.02	2.14	1.78	1.9
ENSG00000271793.1	AL589666.1	1.12908	0.175145	0.506641	0.604408	0.295299	1.26413	0.338148	0.20103	0.311428	0.696739	1.62	1.61	2.78	1.45	2.15	2.39	2.43	1.26	1.85	2.99	1.54	1.95
ENSG00000270983.1	AL589674.1	-1.06442	-0.090072	0.619119	0.707787	-0.208226	1.09476	0.130617	0.619004	0.715741	0.208306	3.04	3.78	4.59	3.93	3.96	3.11	3.51	3.78	3.25	5.26	2.32	4.81
ENSG00000244306.11	AL589743.1	1.12014	0.163679	0.0162554	0.0373909	1.789	-1.01894	-0.0270706	0.581233	0.684511	-0.235649	62.54	59.91	61.32	68.25	73.84	57.56	67.2	75.58	66.76	47.7	61.38	61.26
ENSG00000232295.7	AL589935.1	2.29022	1.19549	0.00335922	0.0102563	2.47376	1.83746	0.87771	0.00704588	0.0225626	2.15206	0.98	1.14	1.97	1.63	4.35	4.72	2.05	2.38	3.29	2.74	1.58	2
ENSG00000260604.2	AL590004.3	2.3655	1.24214	2.98e-08	2.46e-06	7.52546	1.08787	0.121504	0.289675	0.410695	0.538089	0.42	0.43	0.49	0.48	1.03	0.98	0.99	1.04	0.45	0.39	0.39	0.51
ENSG00000284299.1	AL590132.1	-1.10629	-0.145726	0.723393	0.792614	-0.140626	1.15499	0.207876	0.579068	0.682924	0.237271	0.16	0.13	0.09	0.09	0.11	0.15	0.12	0.05	0.07	0.14	0.1	0.17
ENSG00000179627.10	AL590327.1	1.33124	0.412769	0.000557516	0.00240713	3.25374	-1.36855	-0.452645	0.000460218	0.00267921	-3.33704	1.31	1.25	1.37	1.44	1.82	1.82	1.66	1.51	0.85	0.88	1	0.82
ENSG00000204802.3	AL590399.1	1.15405	0.206704	0.0611386	0.110414	1.21368	1.35811	0.4416	0.00483815	0.0168521	2.31532	1.71	1.58	1.58	1.78	1.8	1.92	1.94	1.88	1.4	2.29	2.07	2.01
ENSG00000231652.2	AL590428.1	-1.16383	-0.218875	0.547917	0.643176	-0.261285	-1.03598	-0.051002	0.773409	0.839785	-0.111591	0.64	0.59	0.53	0.61	0.66	0.22	0.53	0.71	0.46	0.5	0.58	0.44
ENSG00000256029.6	AL590560.1	1.335	0.416845	0.0767025	0.132823	1.11519	-1.1167	-0.159239	0.516696	0.628317	-0.286765	0.05	0.16	0.17	0.08	0.17	0.13	0.14	0.17	0.08	0.08	0.15	0.3
ENSG00000272668.2	AL590560.2	1.48204	0.567586	0.000462272	0.00207395	3.3351	-1.84689	-0.885098	2.56e-06	6.04e-05	-5.59205	0.53	0.54	0.66	0.65	0.94	0.95	0.72	0.76	0.29	0.29	0.26	0.29
ENSG00000216802.1	AL590617.1	-1.2002	-0.263276	0.348532	0.451014	-0.457757	-1.13773	-0.186153	0.482077	0.596239	-0.316884	1.05	1.89	2.24	2.83	2.18	1.23	1.52	1.26	1.47	1.11	1.63	1.59
ENSG00000204362.6	AL590644.1	-1.06333	-0.0885899	0.597045	0.688075	-0.223993	-1.04956	-0.0697882	0.626961	0.721944	-0.202759	0.37	0.43	0.53	0.4	0.42	0.32	0.33	0.37	0.3	0.39	0.66	0.34
ENSG00000232850.3	AL590708.1	-1.37008	-0.454261	0.0632945	0.113564	-1.19863	-1.34016	-0.4224	0.0590604	0.12041	-1.2287	0.57	0.49	0.54	0.6	0.27	0.43	0.39	0.44	0.37	0.3	0.48	0.29
ENSG00000218426.5	AL590867.2	-1.31203	-0.3918	0.0519674	0.0966909	-1.28427	-1.10219	-0.140375	0.398235	0.519841	-0.399861	20.35	21.19	15	14.37	13.34	12.36	11.29	15.13	13.4	15.75	14.31	14.68
ENSG00000218418.2	AL591135.1	1.35289	0.436042	0.10338	0.169364	0.985563	1.29809	0.376391	0.12367	0.215862	0.907736	0.14	0.11	0.22	0.12	0.16	0.16	0.21	0.22	0.18	0.19	0.15	0.13
ENSG00000285219.1	AL591485.1	-1.08242	-0.114263	0.340588	0.442964	-0.46777	1.05402	0.075899	0.504971	0.617509	0.296733	1.7	1.98	2.13	2.53	2.22	1.44	1.72	1.92	2.04	2.18	1.7	2.03
ENSG00000225300.1	AL591623.1	-1.09534	-0.131374	0.79542	0.849011	-0.0994036	1.25597	0.328798	0.399288	0.520881	0.398714	0.12	0.22	0.42	0.51	0.42	0.46	0.12	0.12	0.34	0.22	0.32	0.27
ENSG00000254929.6	AL591684.2	-1.07227	-0.100667	0.51347	0.61053	-0.289485	1.31664	0.396856	0.010719	0.0313953	1.96985	3.71	2.7	4.16	3.62	3.88	3.61	2.82	2.54	3.88	4.34	3.96	4.72
ENSG00000116883.8	AL591845.1	-1.12034	-0.163939	0.204594	0.294268	-0.689108	1.18885	0.249566	0.0279959	0.0669235	1.5529	3.82	3.79	5.03	5.07	4.29	4.23	3.21	3.27	4.91	4.89	4.32	5.1
ENSG00000219133.2	AL592114.1	-1.01845	-0.0263748	0.947487	0.963071	-0.0234267	-1.09324	-0.128605	0.736344	0.810323	-0.132919	3.58	3.01	9.3	9.55	5.6	9.04	3.69	4.15	3.61	3.6	4.32	6.83
ENSG00000272750.1	AL592148.3	1.25625	0.329129	0.190724	0.27745	0.719594	-1.0935	-0.128949	0.40921	0.529843	-0.388053	0.35	0.46	0.48	0.5	0.76	0.76	0.4	0.36	0.38	0.33	0.3	0.41
ENSG00000234297.2	AL592293.2	1.26521	0.339375	0.147771	0.225532	0.830411	1.32617	0.407268	0.0568638	0.116855	1.24516	1.06	0.98	0.98	1.14	1.77	0.93	1.44	1.04	1.36	0.91	1.16	1.49
ENSG00000215840.3	AL592295.1	-1.10117	-0.13904	0.39392	0.496493	-0.404592	1.05958	0.0834861	0.649525	0.741254	0.187404	7.06	9.08	11.26	12.37	9.33	9.74	7.55	7.15	7.04	10.58	8.97	11.55
ENSG00000232995.7	AL592435.1	-1.03293	-0.046743	0.644453	0.729195	-0.190809	-1.02409	-0.0343443	0.758948	0.827792	-0.119788	4.93	5.31	6.47	6.29	5.66	5.66	4.88	6.24	4.58	4.63	4.52	5.25
ENSG00000232486.1	AL592437.2	1.48324	0.568755	0.0382031	0.075194	1.4179	1.41626	0.502091	0.00829683	0.0256144	2.08109	0.55	0.68	1	0.85	1.33	1.63	0.81	0.83	0.96	1.12	0.83	0.91
ENSG00000215835.2	AL596087.1	1.06699	0.0935451	0.712684	0.784236	0.147103	1.08257	0.114458	0.628324	0.723045	0.201816	0.78	0.68	0.44	0.62	0.59	0.59	0.82	0.56	0.61	0.55	0.48	0.73
ENSG00000235381.1	AL596202.1	-1.28123	-0.35753	0.124132	0.196597	-0.906118	1.05479	0.0769499	0.701156	0.782185	0.154185	0.41	0.56	0.68	0.81	0.56	0.63	0.36	0.32	0.64	0.5	0.42	0.69
ENSG00000229261.1	AL596223.1	1.27001	0.344835	0.20684	0.296998	0.684366	1.39377	0.478988	0.0916364	0.170401	1.03793	0.31	0.29	0.22	0.5	0.36	0.35	0.43	0.39	0.44	0.34	0.33	0.36
ENSG00000261534.1	AL596244.1	1.69352	0.760027	0.00374578	0.0111801	2.42646	-1.20663	-0.270984	0.147929	0.247223	-0.829947	0.47	0.38	0.66	0.69	1.14	1.02	0.66	0.74	0.43	0.43	0.34	0.35
ENSG00000280099.1	AL603750.1	-1.07872	-0.10932	0.603131	0.693607	-0.219588	-1.47347	-0.559214	0.0104399	0.0306958	-1.9813	1.06	0.78	0.81	1.02	0.71	0.81	0.71	1.07	0.47	0.53	0.51	0.63
ENSG00000234329.1	AL604028.2	-1.23408	-0.303441	0.191845	0.278829	-0.71705	1.11493	0.156958	0.404127	0.525217	0.393483	1.92	3.17	2.57	3.93	2.78	2.75	1.86	1.63	2.93	2.39	2.74	2.92
ENSG00000226292.1	AL606495.1	-1.02892	-0.0411289	0.885834	0.91746	-0.0526474	-1.47318	-0.558932	0.0690287	0.136234	-1.16097	1.24	1.63	0.89	1.62	1.58	1.44	1.3	0.74	0.84	0.89	0.45	0.85
[truncated: 13,893 more rows]
